# Supplementary material for: Silencing long-descending inter-enlargement propriospinal neurons improves hindlimb stepping after contusive spinal cord injuries
Source: eLife. 2023 Dec 15;12:e82944. doi: 10.7554/eLife.82944 (PMC10776087; doi:10.7554/eLife.82944)
Supplement: Figure 2—source data 1. — These files contain interlimb phase data for the pre-injury control time point with the animals walking on acrylic and sylgard surfaces, plus pre-injury DoxON (silenced) with the animals walking on acrylic and sylgard surfaces. Raw data for Figure 2—figure supplement 2A-F can be found associated with Shepard et al., 2021. [file elife-82944-fig2-data1.xlsx]

## Sheet: Pre-Injury Con. Phase - Acrylic
Time point	Animal ID	Hindlimb Phase	Heterolateral Phase	Homolateral Phase	Forelimb Phase			Time point	Animal ID	Hindlimb Phase	Heterolateral Phase	Homolateral Phase	Forelimb Phase			Time point	Animal ID	Hindlimb Phase	Heterolateral Phase	Homolateral Phase	Forelimb Phase			Time point	Animal ID	Hindlimb Phase	Heterolateral Phase	Homolateral Phase	Forelimb Phase
BL	2	0.535714	0.178571	0.607143	0.571429			PD1	2	0.64	0	0.56	0.5			Post D1	2	0.583333	0.125	0.541667	0.545455			PD2	5	0.540541	0	0.513514	0.5625
BL	2	0.53125	0.21875	0.75	0.566667			PD1	2	0.5	0.107143	0.571429	0.52			Post D1	2	0.5	0.0909091	0.545455	0.52381			PD2	5	0.534884	0.162791	0.790698	0.675
BL	2	0.538462	0.0769231	0.615385	0.5			PD1	2	0.605263	0	0.710526	0.574468			Post D1	2	0.541667	0.291667	0.666667	0.526316			PD2	5	0.547619	0.142857	0.52381	0.674419
BL	2	0.5	0.115385	0.615385	0.52			PD1	2	0.53125	0.09375	0.5	0.551724			Post D1	2	0.541667	0.125	0.541667	0.545455			PD2	5	0.568182	0.0227273	0.636364	0.613636
BL	2	0.566667	0.233333	0.6	0.645161			PD1	2	0.512821	0.179487	0.641026	0.571429			Post D1	2	0.666667	0.190476	0.619048	0.55			PD2	5	0.548387	0.03125	0.516129	0.53125
BL	2	0.62963	0.296296	0.703704	0.576923			PD1	2	0.578947	0.210526	0.684211	0.513514			Post D1	2	0.538462	0.192308	0.576923	0.545455			PD2	5	0.533333	0.0666667	0.533333	0.548387
BL	2	0.535714	0.107143	0.571429	0.580645			PD1	2	0.510638	0.234043	0.659574	0.545455			Post D1	2	0.517241	0.0689655	0.586207	0.517241			PD2	5	0.64	0.12	0.68	0.5
BL	2	0.64	0.2	0.6	0.565217			PD1	2	0.566667	0.133333	0.566667	0.566667			Post D1	2	0.580645	0.225806	0.548387	0.615385			PD2	5	0.547619	0.0476191	0.547619	0.552632
BL	2	0.633333	0.2	0.6	0.555556			PD1	2	0.612903	0.225806	0.548387	0.642857			Post D1	2	0.535714	0.107143	0.571429	0.535714			PD2	5	0.5625	0.0476191	0.5	0.545455
BL	2	0.678571	0.285714	0.642857	0.615385			PD1	2	0.527778	0.111111	0.5	0.6			Post D1	2	0.583333	0.0689655	0.666667	0.611111			PD2	6	0.571429	0	0.607143	0.592593
BL	3	0.515152	0	0.69697	0.657143			PD1	2	0.551724	0.206897	0.689655	0.518519			Post D1	2	0.518519	0.0769231	0.548387	0.516129			PD2	6	0.516129	0.0357143	0.580645	0.5625
BL	3	0.515152	0.121212	0.575758	0.517241			PD1	2	0.560976	0.146341	0.634146	0.512195			Post D1	3	0.517241	0.04	0.586207	0.580645			PD2	6	0.571429	0	0.571429	0.571429
BL	3	0.558824	0.0882353	0.647059	0.59375			PD1	2	0.575758	0	0.545455	0.571429			Post D1	3	0.56	0.08	0.52	0.5			PD2	6	0.631579	0.0526316	0.578947	0.571429
BL	3	0.566667	0.133333	0.6	0.517241			PD1	2	0.548387	0.0645161	0.516129	0.551724			Post D1	3	0.85	0.2	0.6	0.578947			PD2	6	0.684211	0	0.526316	0.571429
BL	3	0.571429	0.107143	0.535714	0.586207			PD1	3	0.555556	0.0882353	0.592593	0.59375			Post D1	3	0.772727	0.181818	0.590909	0.590909			PD2	6	0.52	0.08	0.64	0.5
BL	3	0.527778	0.0344828	0.722222	0.54			PD1	3	0.558824	0.0882353	0.529412	0.535714			Post D1	3	0.6	0.12	0.56	0.521739			PD2	6	0.56	0.04	0.64	0.576923
BL	3	0.551724	0.137931	0.517241	0.541667			PD1	3	0.580645	0.0645161	0.548387	0.53125			Post D1	3	0.653846	0.0769231	0.538462	0.555556			PD2	6	0.652174	0.0434783	0.521739	0.565217
BL	3	0.535714	0	0.535714	0.5			PD1	3	0.580645	0.0967742	0.580645	0.5			Post D1	3	0.52	0.08	0.56	0.571429			PD2	6	0.5	0.0384615	0.576923	0.517241
BL	3	0.555556	0.0714286	0.592593	0.551724			PD1	3	0.5625	0.15625	0.625	0.5			Post D1	3	0.615385	0.115385	0.5	0.583333			PD2	6	0.535714	0.0357143	0.607143	0.571429
BL	3	0.604651	0.0833333	0.511628	0.538462			PD1	3	0.571429	0.0714286	0.607143	0.516129			Post D1	3	0.695652	0.130435	0.565217	0.565217			PD2	7	0.565217	0.121212	0.565217	0.541667
BL	3	0.583333	0.115385	0.555556	0.606061			PD1	3	0.517241	0.0344828	0.551724	0.571429			Post D1	3	0.6	0.12	0.52	0.565217			PD2	7	0.521739	0.0869565	0.521739	0.545455
BL	4	0.529412	0.235294	0.705882	0.515152			PD1	3	0.558824	0	0.529412	0.555556			Post D1	3	0.782609	0.26087	0.608696	0.6			PD2	7	0.608696	0.130435	0.565217	0.545455
BL	4	0.516129	0.258065	0.774194	0.516129			PD1	3	0.551724	0	0.551724	0.5			Post D1	4	0.538462	0.0714286	0.538462	0.5			PD2	7	0.636364	0.181818	0.545455	0.6
BL	4	0.5	0.194444	0.694444	0.513514			PD1	3	0.53125	0.125	0.53125	0.535714			Post D1	4	0.513514	0.054054	0.540541	0.513514			PD2	7	0.6	0.16	0.56	0.583333
BL	4	0.571429	0.238095	0.761905	0.564103			PD1	3	0.516129	0	0.612903	0.6			Post D1	4	0.542857	0.0571429	0.542857	0.514286			PD2	7	0.555556	0.037037	0.555556	0.517241
BL	4	0.55	0.125	0.55	0.585366			PD1	3	0.5	0.0322581	0.5	0.515152			Post D1	4	0.548387	0.0967742	0.580645	0.53125			PD2	7	0.535714	0.142857	0.607143	0.52
BL	4	0.5	0.166667	0.633333	0.533333			PD1	3	0.595238	0	0.595238	0.527778			Post D1	4	0.529412	0.030303	0.5	0.513514			PD2	7	0.533333	0	0.6	0.586207
BL	4	0.5	0.125	0.5625	0.575758			PD1	4	0.538462	0.153846	0.564103	0.542857			Post D1	4	0.515152	0.0606061	0.515152	0.5			PD2	7	0.545455	0.0333333	0.575758	0.5
BL	4	0.512821	0.102564	0.564103	0.560976			PD1	4	0.530612	0.0204082	0.510204	0.555556			Post D1	4	0.580645	0.193548	0.548387	0.645161			PD2	8	0.52	0.08	0.6	0.541667
BL	4	0.527778	0.0277778	0.527778	0.538462			PD1	4	0.536585	0.0487805	0.560976	0.525			Post D1	4	0.678571	0.142857	0.571429	0.6			PD2	8	0.515152	0.030303	0.575758	0.580645
BL	4	0.5	0.0588235	0.529412	0.515152			PD1	4	0.547619	0.190476	0.690476	0.525			Post D1	4	0.586207	0.172414	0.62069	0.535714			PD2	8	0.571429	0.030303	0.514286	0.575758
BL	4	0.558824	0	0.558824	0.53125			PD1	4	0.525	0.2	0.65	0.55			Post D1	4	0.551724	0.0689655	0.551724	0.5			PD2	8	0.589744	0.0857143	0.692308	0.642857
BL	4	0.55	0.0588235	0.55	0.555556			PD1	4	0.577778	0.155556	0.644444	0.541667			Post D1	5	0.592593	0.0740741	0.518519	0.571429			PD2	8	0.55814	0.0232558	0.674419	0.690476
BL	5	0.548387	0.0645161	0.645161	0.514286			PD1	4	0.522727	0.159091	0.636364	0.522727			Post D1	5	0.607143	0.178571	0.571429	0.56			PD2	8	0.527778	0	0.583333	0.517241
BL	5	0.5	0.147059	0.588235	0.516129			PD1	4	0.534884	0.139535	0.604651	0.565217			Post D1	5	0.62963	0.148148	0.666667	0.518519			PD2	8	0.590909	0.194444	0.568182	0.64
BL	5	0.5	0.0652174	0.521739	0.512195			PD1	4	0.511111	0.133333	0.688889	0.555556			Post D1	5	0.62963	0.111111	0.592593	0.535714			PD2	8	0.619048	0.0476191	0.52381	0.545455
BL	5	0.527778	0.0434783	0.527778	0.558824			PD1	4	0.55	0.025	0.55	0.533333			Post D1	5	0.5	0.133333	0.633333	0.517241			PD2	8	0.555556	0.0416667	0.6	0.56
BL	5	0.53125	0.111111	0.6875	0.548387			PD1	4	0.542857	0.0263158	0.514286	0.5			Post D1	5	0.633333	0.166667	0.633333	0.517241			PD2	8	0.52	0.030303	0.6	0.52
BL	5	0.655172	0.275862	0.724138	0.518519			PD1	4	0.552632	0.0263158	0.5	0.5			Post D1	5	0.525	0.05	0.575	0.525			PD2	8	0.564103	0.0714286	0.586957	0.608696
BL	5	0.571429	0.0571429	0.657143	0.512195			PD1	4	0.555556	0.0833333	0.5	0.558824			Post D1	5	0.548387	0.16129	0.548387	0.571429			PD2	8	0.53125	0	0.514286	0.542857
BL	5	0.606061	0.121212	0.515152	0.580645			PD1	5	0.52381	0.166667	0.714286	0.575			Post D1	5	0.571429	0.0357143	0.571429	0.517241			PD2	8	0.555556	0.14	0.586207	0.517241
BL	5	0.529412	0.0588235	0.588235	0.529412			PD1	5	0.513514	0.0810811	0.540541	0.585366			Post D1	5	0.526316	0.131579	0.5	0.588235			PD2	13	0.542857	0.037037	0.542857	0.575
BL	5	0.606061	0.242424	0.575758	0.592593			PD1	5	0.5	0.117647	0.617647	0.515152			Post D1	5	0.56	0.12	0.52	0.565217			PD2	13	0.518519	0	0.518519	0.5
BL	5	0.633333	0.030303	0.633333	0.525			PD1	5	0.535714	0.025	0.571429	0.53125			Post D1	5	0.625	0.166667	0.666667	0.521739			PD2	13	0.535714	0	0.535714	0.535714
BL	5	0.6	0.0666667	0.6	0.515152			PD1	5	0.575	0.025	0.525	0.55			Post D1	6	0.52	0.16	0.6	0.521739			PD2	13	0.586207	0	0.551724	0.566667
BL	5	0.517241	0.103448	0.551724	0.535714			PD1	5	0.525	0.025	0.525	0.526316			Post D1	6	0.625	0.208333	0.625	0.565217			PD2	13	0.575758	0.0606061	0.515152	0.545455
BL	5	0.62963	0.185185	0.592593	0.56			PD1	5	0.53125	0.0625	0.5625	0.515152			Post D1	6	0.571429	0.0952381	0.619048	0.52381			PD2	13	0.59375	0.03125	0.53125	0.548387
BL	6	0.517241	0.137931	0.689655	0.592593			PD1	5	0.577778	0.0681818	0.511111	0.5			Post D1	6	0.533333	0.133333	0.533333	0.555556			PD2	13	0.578947	0	0.552632	0.538462
BL	6	0.551724	0.206897	0.655172	0.518519			PD1	5	0.568182	0	0.545455	0.595238			Post D1	6	0.636364	0.121212	0.545455	0.575758			PD2	13	0.518519	0.0384615	0.555556	0.5
BL	6	0.5	0.0487805	0.552632	0.522727			PD1	5	0.59375	0.15625	0.5625	0.566667			Post D1	6	0.541667	0.125	0.625	0.52			PD2	13	0.538462	0	0.538462	0.5
BL	6	0.609756	0.121951	0.585366	0.558824			PD1	5	0.666667	0.233333	0.633333	0.571429			Post D1	6	0.545455	0.0384615	0.590909	0.538462			PD2	13	0.578947	0	0.526316	0.52381
BL	6	0.529412	0.0882353	0.588235	0.527778			PD1	5	0.606061	0.121212	0.636364	0.527778			Post D1	6	0.518519	0.16	0.555556	0.517241			PD2	13	0.777778	0.111111	0.5	0.611111
BL	6	0.625	0.0416667	0.541667	0.583333			PD1	5	0.52	0.0714286	0.52	0.517241			Post D1	6	0.548387	0.0322581	0.516129	0.6			PD2	14	0.575758	0.121212	0.727273	0.588235
BL	6	0.6	0.04	0.56	0.565217			PD1	5	0.535714	0	0.5	0.538462			Post D1	6	0.538462	0.115385	0.538462	0.541667			PD2	14	0.7	0.08	0.76	0.68
BL	6	0.517241	0.04	0.62069	0.548387			PD1	6	0.6	0.0344828	0.56	0.555556			Post D1	7	0.545455	0.136364	0.590909	0.5			PD2	14	0.516129	0.129032	0.580645	0.575758
BL	6	0.5	0.0344828	0.535714	0.548387			PD1	6	0.62069	0	0.517241	0.535714			Post D1	7	0.541667	0.0416667	0.541667	0.5			PD2	14	0.564103	0.0769231	0.564103	0.525
BL	6	0.535714	0.107143	0.571429	0.5			PD1	6	0.644444	0.111111	0.644444	0.585366			Post D1	7	0.538462	0.115385	0.538462	0.541667			PD2	14	0.551724	0.0344828	0.62069	0.5
BL	6	0.518519	0.0740741	0.666667	0.571429			PD1	6	0.533333	0.133333	0.6	0.548387			Post D1	7	0.545455	0.0454546	0.545455	0.5			PD2	14	0.510638	0.0212766	0.617021	0.528302
BL	6	0.515152	0	0.575758	0.513514			PD1	6	0.607143	0.0357143	0.535714	0.586207			Post D1	7	0.6	0.2	0.6	0.52381			PD2	14	0.5	0.108696	0.521739	0.547619
BL	6	0.551724	0	0.586207	0.586207			PD1	6	0.62069	0.0689655	0.551724	0.576923			Post D1	7	0.5	0.0384615	0.5	0.5			PD2	14	0.5625	0.125	0.5625	0.5625
BL	7	0.518519	0.111111	0.666667	0.5			PD1	6	0.5	0.0666667	0.633333	0.515152			Post D1	7	0.518519	0.0384615	0.62963	0.541667			PD2	14	0.529412	0.117647	0.588235	0.515152
BL	7	0.633333	0.166667	0.633333	0.5			PD1	6	0.5	0	0.566667	0.53125			Post D1	7	0.535714	0	0.571429	0.5			PD2	17	0.595238	0.119048	0.714286	0.581395
BL	7	0.545455	0.0454546	0.545455	0.521739			PD1	6	0.566667	0.0666667	0.6	0.516129			Post D1	7	0.583333	0.166667	0.666667	0.538462			PD2	17	0.533333	0.111111	0.711111	0.6
BL	7	0.638889	0.111111	0.638889	0.575758			PD1	6	0.517241	0.0689655	0.551724	0.517241			Post D1	7	0.52	0	0.56	0.541667			PD2	17	0.536585	0.097561	0.609756	0.5
BL	7	0.576923	0.153846	0.653846	0.5			PD1	6	0.590909	0.363636	0.818182	0.6			Post D1	8	0.625	0.208333	0.541667	0.619048			PD2	17	0.566667	0.0333333	0.5	0.5
BL	7	0.516129	0.0645161	0.548387	0.545455			PD1	6	0.625	0.458333	0.916667	0.521739			Post D1	8	0.65	0.2	0.65	0.571429			PD2	17	0.5	0.0333333	0.6	0.518519
BL	7	0.555556	0.0740741	0.555556	0.5			PD1	7	0.533333	0	0.533333	0.575758			Post D1	8	0.65	0.1	0.55	0.571429			PD2	17	0.548387	0	0.548387	0.5
BL	7	0.533333	0.0645161	0.5	0.53125			PD1	7	0.529412	0.156863	0.509804	0.625			Post D1	8	0.75	0.15	0.55	0.6			PD2	17	0.533333	0.1	0.566667	0.518519
BL	7	0.521739	0.0869565	0.695652	0.538462			PD1	7	0.527778	0.111111	0.555556	0.6			Post D1	8	0.555556	0.0555556	0.555556	0.55			PD2	17	0.551724	0	0.517241	0.5
BL	7	0.518519	0.148148	0.555556	0.56			PD1	7	0.533333	0.2	0.633333	0.535714			Post D1	8	0.722222	0	0.5	0.529412			PD2	17	0.5625	0.03125	0.5625	0.551724
BL	7	0.589744	0.25641	0.692308	0.515152			PD1	7	0.540541	0.135135	0.621622	0.513514			Post D1	8	0.666667	0	0.619048	0.6			PD2	17	0.516129	0.0625	0.516129	0.515152
BL	7	0.6	0	0.56	0.538462			PD1	7	0.566667	0	0.566667	0.5			Post D1	8	0.571429	0.0476191	0.571429	0.5			PD2	17	0.515152	0.030303	0.515152	0.545455
BL	7	0.666667	0	0.541667	0.5			PD1	7	0.52	0.08	0.6	0.5			Post D1	8	0.578947	0	0.526316	0.526316			PD2	17	0.586207	0.103448	0.551724	0.551724
BL	8	0.551724	0	0.586207	0.551724			PD1	7	0.555556	0.037037	0.518519	0.535714			Post D1	8	0.7	0.2	0.5	0.684211			PD2	17	0.555556	0.0740741	0.592593	0.5
BL	8	0.6	0.0333333	0.533333	0.6			PD1	7	0.514286	0.0571429	0.628571	0.555556			Post D1	9	0.5	0.0769231	0.615385	0.518519			PD2	18	0.516129	0.0645161	0.516129	0.548387
BL	8	0.518519	0.0333333	0.555556	0.68			PD1	7	0.538462	0.0769231	0.512821	0.552632			Post D1	9	0.56	0.24	0.56	0.619048			PD2	18	0.529412	0.0588235	0.617647	0.542857
BL	8	0.633333	0.0322581	0.566667	0.653846			PD1	7	0.533333	0.166667	0.666667	0.517241			Post D1	9	0.541667	0	0.5	0.545455			PD2	18	0.535714	0.142857	0.535714	0.576923
BL	8	0.586207	0.103448	0.551724	0.586207			PD1	7	0.6	0.0333333	0.633333	0.529412			Post D1	9	0.5	0.0833333	1	0.52			PD2	18	0.521739	0	0.521739	0.52
BL	8	0.56	0.0344828	0.56	0.56			PD1	8	0.65625	0.15625	0.59375	0.5625			Post D1	9	0.571429	0.0454546	0.636364	0.5			PD2	18	0.631579	0.105263	0.526316	0.529412
BL	8	0.516129	0	0.612903	0.516129			PD1	8	0.606061	0.151515	0.606061	0.545455			Post D1	9	0.571429	0.192308	0.52381	0.52			PD2	18	0.565217	0	0.565217	0.583333
BL	8	0.565217	0.0416667	0.521739	0.565217			PD1	8	0.621622	0.162162	0.702703	0.555556			Post D1	9	0.615385	0.0476191	0.52381	0.588235			PD2	18	0.515152	0	0.515152	0.555556
BL	8	0.666667	0.0740741	0.541667	0.666667			PD1	8	0.571429	0	0.542857	0.513514			Post D1	9	0.52381	0.037037	0.5	0.518519			PD2	18	0.615385	0.233769	0.692308	0.5
BL	8	0.62069	0	0.517241	0.62069			PD1	8	0.513514	0.135135	0.540541	0.53125			Post D1	9	0.521739	0.0454546	0.571429	0.545455
BL	8	0.548387	0.0322581	0.516129	0.548387			PD1	8	0.53125	0.09375	0.65625	0.5			Post D1	9	0.590909	0	0.521739	0.5
BL	8	0.533333	0.0333333	0.566667	0.533333			PD1	8	0.529412	0.0882353	0.558824	0.529412			Post D1	10	0.538462	0	0.538462	0.545455
BL	8	0.518519	0.0666667	0.555556	0.518519			PD1	8	0.571429	0.166667	0.595238	0.526316			Post D1	10	0.552632	0.157895	0.631579	0.513514
BL	9	0.53125	0.15625	0.65625	0.516129			PD1	8	0.580645	0.0645161	0.516129	0.5625			Post D1	10	0.516129	0.0645161	0.645161	0.514286
BL	9	0.527778	0.194444	0.722222	0.558824			PD1	8	0.542857	0.114286	0.542857	0.545455			Post D1	10	0.636364	0.0434783	0.590909	0.565217
BL	9	0.533333	0.1	0.733333	0.558824			PD1	8	0.529412	0.0588235	0.558824	0.515152			Post D1	10	0.636364	0.0909091	0.636364	0.545455
BL	9	0.5	0.0333333	0.5	0.533333			PD1	8	0.545455	0.0606061	0.545455	0.515152			Post D1	10	0.52381	0.0476191	0.619048	0.521739
BL	9	0.5	0.03125	0.59375	0.5625			PD1	8	0.516129	0	0.516129	0.545455			Post D1	10	0.68	0	0.52	0.52
BL	9	0.515152	0.0909091	0.575758	0.65625			PD1	9	0.529412	0.0588235	0.647059	0.526316			Post D1	10	0.636364	0	0.590909	0.571429
BL	9	0.571429	0	0.619048	0.56			PD1	9	0.529412	0.0588235	0.588235	0.529412			Post D1	10	0.5	0.136364	0.545455	0.571429
BL	9	0.529412	0.0294118	0.647059	0.677419			PD1	9	0.555556	0.0740741	0.592593	0.5			Post D1	10	0.736842	0	0.578947	0.619048
BL	9	0.535714	0.0588235	0.607143	0.551724			PD1	9	0.518519	0.111111	0.592593	0.5			Post D1	11	0.5	0.0588235	0.558824	0.514286
BL	9	0.5625	0.0357143	0.75	0.709677			PD1	9	0.558824	0	0.558824	0.527778			Post D1	11	0.575758	0.0909091	0.545455	0.53125
BL	9	0.526316	0.0789474	0.578947	0.633333			PD1	9	0.5	0.0625	0.53125	0.5			Post D1	11	0.5	0.0333333	0.566667	0.516129
BL	9	0.52	0.131579	0.68	0.551724			PD1	9	0.515152	0	0.515152	0.516129			Post D1	11	0.605263	0.0357143	0.578947	0.564103
BL	9	0.541667	0	0.5	0.545455			PD1	9	0.571429	0.0606061	0.571429	0.518519			Post D1	11	0.53125	0.03125	0.53125	0.516129
BL	9	0.56	0.0833333	0.56	0.565217			PD1	9	0.566667	0.107143	0.533333	0.551724			Post D1	11	0.53125	0	0.5	0.515152
BL	9	0.565217	0.16	0.608696	0.5			PD1	9	0.576923	0.1	0.576923	0.517241			Post D1	11	0.5	0.0294118	0.5	0.513514
BL	10	0.5	0.266667	0.766667	0.516129			PD1	9	0.515152	0.121212	0.515152	0.513514			Post D1	11	0.5	0	0.529412	0.515152
BL	10	0.5	0.285714	0.785714	0.5			PD1	9	0.62069	0.103448	0.586207	0.580645			Post D1	11	0.555556	0.037037	0.555556	0.5
BL	10	0.634615	0.0769231	0.538462	0.545455			PD1	10	0.522727	0.204545	0.75	0.533333			Post D1	11	0.535714	0.0714286	0.571429	0.56
BL	10	0.514286	0.0769231	0.628571	0.5			PD1	10	0.540541	0.162162	0.783784	0.575			Post D1	12	0.526316	0	0.578947	0.578947
BL	10	0.548387	0.142857	0.677419	0.53125			PD1	10	0.525	0.125	0.65	0.538462			Post D1	12	0.6	0	0.55	0.55
BL	10	0.525	0.15	0.7	0.536585			PD1	10	0.513514	0.243243	0.702703	0.515152			Post D1	12	0.538462	0	0.538462	0.538462
BL	10	0.512821	0.179487	0.666667	0.5			PD1	10	0.54	0.18	0.72	0.6			Post D1	12	0.5	0	0.541667	0.578947
BL	10	0.564103	0.205128	0.692308	0.5			PD1	10	0.552632	0.131579	0.684211	0.5			Post D1	12	0.652174	0.0869565	0.565217	0.5
BL	10	0.5	0.2	0.7	0.512821			PD1	10	0.548387	0.0645161	0.677419	0.558824			Post D1	12	0.541667	0.0416667	0.541667	0.5
BL	10	0.578947	0.157895	0.657895	0.525			PD1	10	0.540541	0.162162	0.702703	0.526316			Post D1	12	0.5	0	0.5	0.521739
BL	10	0.5	0.0666667	0.7	0.558824			PD1	10	0.514286	0.171429	0.685714	0.514286			Post D1	12	0.5	0.0416667	0.541667	0.545455
BL	10	0.53125	0.25	0.71875	0.5			PD1	10	0.5	0.194444	0.777778	0.617647			Post D1	12	0.521739	0.0416667	0.571429	0.571429
BL	10	0.575758	0.30303	0.787879	0.516129			PD1	10	0.527778	0.25	0.722222	0.5			Post D1	12	0.6	0.0416667	0.52381	0.52381
BL	10	0.515152	0.151515	0.606061	0.545455			PD1	10	0.513514	0.189189	0.756757	0.583333			Post D1	13	0.652174	0	0.521739	0.5
BL	10	0.548387	0.129032	0.709677	0.5625			PD1	10	0.529412	0.176471	0.676471	0.514286			Post D1	13	0.521739	0	0.521739	0.521739
BL	11	0.552632	0.131579	0.605263	0.538462			PD1	11	0.522727	0.181818	0.681818	0.578947			Post D1	13	0.625	0	0.541667	0.576923
BL	11	0.513514	0.108108	0.621622	0.5			PD1	11	0.525	0.125	0.65	0.511628			Post D1	13	0.533333	0.0333333	0.5	0.517241
BL	11	0.5	0.105263	0.736842	0.631579			PD1	11	0.5	0	0.529412	0.5			Post D1	13	0.666667	0.0833333	0.541667	0.56
BL	11	0.540541	0.0810811	0.513514	0.567568			PD1	11	0.552632	0.0789474	0.526316	0.514286			Post D1	13	0.681818	0.136364	0.545455	0.590909
BL	11	0.5	0.0666667	0.566667	0.516129			PD1	11	0.567568	0.108108	0.567568	0.540541			Post D1	13	0.521739	0.0434783	0.521739	0.565217
BL	11	0.512821	0	0.512821	0.555556			PD1	11	0.542857	0.0571429	0.6	0.513514			Post D1	13	0.565217	0.0434783	0.521739	0.583333
BL	11	0.513514	0.0769231	0.594595	0.5			PD1	11	0.62069	0.103448	0.586207	0.533333			Post D1	13	0.636364	0.0909091	0.545455	0.545455
BL	11	0.5	0.0588235	0.558824	0.514286			PD1	11	0.551724	0.103448	0.551724	0.551724			Post D1	13	0.533333	0.12	0.5	0.533333
BL	11	0.545455	0.0909091	0.575758	0.5			PD1	11	0.575758	0.0606061	0.575758	0.515152			Post D1	13	0.518519	0.136364	0.6	0.6
BL	11	0.527778	0.0833333	0.555556	0.540541			PD1	11	0.606061	0.0606061	0.545455	0.515152			Post D1	14	0.625	0.0416667	0.5	0.521739
BL	11	0.589744	0.0512821	0.615385	0.55			PD1	11	0.583333	0.0833333	0.583333	0.5			Post D1	14	0.558824	0.0588235	0.5	0.517241
BL	11	0.540541	0.108108	0.540541	0.542857			PD1	11	0.594595	0.162162	0.567568	0.558824			Post D1	14	0.5	0.0882353	0.633333	0.518519
BL	11	0.5	0.0555556	0.527778	0.540541			PD1	12	0.535714	0.142857	0.571429	0.571429			Post D1	14	0.538462	0	0.5	0.518519
BL	11	0.551724	0.0344828	0.551724	0.5			PD1	12	0.538462	0.115385	0.615385	0.518519			Post D1	14	0.535714	0.0714286	0.571429	0.538462
BL	12	0.514286	0.2	0.657143	0.542857			PD1	12	0.516129	0	0.516129	0.533333			Post D1	14	0.548387	0.0322581	0.612903	0.545455
BL	12	0.515152	0.151515	0.727273	0.542857			PD1	12	0.5	0.0322581	0.538462	0.518519			Post D1	14	0.540541	0.108108	0.513514	0.558824
BL	12	0.555556	0.148148	0.592593	0.555556			PD1	12	0.571429	0	0.5	0.5			Post D1	14	0.607143	0.0357143	0.535714	0.538462
BL	12	0.586207	0.137931	0.62069	0.517241			PD1	12	0.517241	0	0.517241	0.518519			Post D1	14	0.533333	0.1	0.6	0.576923
BL	12	0.585366	0.0243902	0.512195	0.545455			PD1	12	0.551724	0.0689655	0.551724	0.517241			Post D1	14	0.615385	0.15625	0.5	0.5625
BL	12	0.527778	0.138889	0.527778	0.625			PD1	12	0.6	0.0571429	0.514286	0.516129			Post D1	15	0.538462	0	0.538462	0.518519
BL	12	0.535714	0.107143	0.642857	0.5			PD1	12	0.571429	0.0571429	0.6	0.516129			Post D1	15	0.555556	0.037037	0.62963	0.515152
BL	12	0.5	0.0625	0.5	0.5625			PD1	12	0.5	0.0333333	0.533333	0.52			Post D1	15	0.542857	0.0857143	0.657143	0.606061
BL	12	0.516129	0.129032	0.548387	0.551724			PD1	13	0.571429	0.0526316	0.571429	0.564103			Post D1	15	0.6	0.08	0.6	0.5
BL	12	0.533333	0.0333333	0.533333	0.5			PD1	13	0.605263	0	0.526316	0.555556			Post D1	15	0.607143	0.0714286	0.607143	0.535714
BL	12	0.518519	0.037037	0.555556	0.518519			PD1	13	0.567568	0.027027	0.702703	0.641026			Post D1	15	0.533333	0.133333	0.566667	0.518519
BL	12	0.580645	0.0322581	0.516129	0.5			PD1	13	0.588235	0.117647	0.558824	0.516129			Post D1	15	0.575758	0.121212	0.666667	0.545455
BL	12	0.518519	0.0645161	0.518519	0.555556			PD1	13	0.607143	0	0.535714	0.514286			Post D1	15	0.6	0.08	0.56	0.538462
BL	13	0.5	0.0333333	0.6	0.540541			PD1	13	0.5	0.0333333	0.533333	0.5			Post D1	15	0.535714	0.0714286	0.571429	0.518519
BL	13	0.5625	0	0.5625	0.545455			PD1	13	0.5	0	0.5	0.516129			Post D1	15	0.536585	0.195122	0.634146	0.529412
BL	13	0.580645	0.0322581	0.516129	0.5625			PD1	13	0.548387	0.0322581	0.580645	0.515152			Post D1	15	0.607143	0.107143	0.642857	0.545455
BL	13	0.517241	0.0344828	0.517241	0.517241			PD1	13	0.518519	0	0.518519	0.533333			Post D1	16	0.527778	0.138889	0.611111	0.5
BL	13	0.538462	0	0.538462	0.518519			PD1	13	0.571429	0	0.5	0.517241			Post D1	16	0.606061	0.030303	0.606061	0.513514
BL	13	0.583333	0.0416667	0.541667	0.521739			PD1	13	0.515152	0.030303	0.545455	0.538462			Post D1	16	0.612903	0	0.580645	0.575758
BL	13	0.548387	0.129032	0.516129	0.6			PD1	13	0.53125	0.09375	0.65625	0.6			Post D1	16	0.551724	0.137931	0.62069	0.5625
BL	13	0.517241	0.0344828	0.551724	0.53125			PD1	13	0.514286	0.171429	0.571429	0.5625			Post D1	16	0.516129	0.0967742	0.612903	0.529412
BL	13	0.5	0	0.5	0.53125			PD1	14	0.511628	0.139535	0.604651	0.591837			Post D1	16	0.517241	0.0689655	0.551724	0.517241
BL	13	0.558824	0.0588235	0.5	0.53125			PD1	14	0.511628	0.0930233	0.534884	0.577778			Post D1	16	0.517241	0.0689655	0.551724	0.5
BL	13	0.515152	0	0.515152	0.527778			PD1	14	0.55	0.175	0.65	0.513514			Post D1	16	0.6	0.15	0.55	0.578947
BL	13	0.527778	0.166667	0.583333	0.5			PD1	14	0.527778	0.138889	0.555556	0.53125			Post D1	16	0.53125	0.0882353	0.636364	0.545455
BL	14	0.527778	0.166667	0.583333	0.594595			PD1	14	0.5625	0.09375	0.65625	0.529412			Post D1	16	0.5	0.135135	0.575758	0.515152
BL	14	0.588235	0.176471	0.647059	0.529412			PD1	14	0.542857	0.142857	0.6	0.515152			Post D1	16	0.518519	0.030303	0.535714	0.535714
BL	14	0.534884	0.0465116	0.511628	0.5			PD1	14	0.522727	0.136364	0.545455	0.571429			Post D1	16	0.558824	0.030303	0.516129	0.548387
BL	14	0.5	0.0697674	0.578947	0.568182			PD1	14	0.5	0.111111	0.583333	0.552632			Post D1	17	0.527778	0.0555556	0.527778	0.527778
BL	14	0.512195	0.0731707	0.536585	0.516129			PD1	14	0.526316	0.0789474	0.605263	0.512821			Post D1	17	0.515152	0.0909091	0.545455	0.53125
BL	14	0.648649	0.0810811	0.540541	0.552632			PD1	14	0.5	0.175	0.6	0.585366			Post D1	17	0.533333	0.0666667	0.533333	0.517241
BL	14	0.565217	0.0869565	0.608696	0.533333			PD1	14	0.538462	0.205128	0.692308	0.5			Post D1	17	0.516129	0.0322581	0.516129	0.518519
BL	14	0.575	0	0.55	0.580645			PD1	14	0.568182	0	0.545455	0.538462			Post D1	17	0.518519	0	0.555556	0.517241
BL	14	0.538462	0.225	0.538462	0.5625			PD1	14	0.5	0.0625	0.520833	0.511111			Post D1	17	0.518519	0.0740741	0.518519	0.521739
BL	14	0.512195	0	0.609756	0.567568			PD1	14	0.55	0.125	0.625	0.534884			Post D1	17	0.571429	0.142857	0.547619	0.527778
BL	14	0.5	0	0.522727	0.6			PD1	14	0.545455	0.181818	0.522727	0.634146			Post D1	17	0.59375	0	0.53125	0.53125
BL	14	0.6	0.204545	0.55	0.607843			PD1	15	0.522727	0.159091	0.636364	0.543478			Post D1	17	0.533333	0	0.566667	0.548387
BL	14	0.521739	0.0434783	0.521739	0.545455			PD1	15	0.55	0.2	0.7	0.512821			Post D1	17	0.555556	0.037037	0.518519	0.5
BL	14	0.534884	0	0.511628	0.5			PD1	15	0.512195	0.170732	0.707317	0.52381			Post D1	17	0.535714	0	0.535714	0.5
BL	15	0.583333	0.166667	0.5625	0.55814			PD1	15	0.540541	0.135135	0.675676	0.540541			Post D1	17	0.548387	0.0645161	0.548387	0.517241
BL	15	0.527778	0.166667	0.694444	0.5			PD1	15	0.514286	0.171429	0.685714	0.529412			Post D1	18	0.545455	0.0909091	0.590909	0.5
BL	15	0.527778	0.0833333	0.638889	0.526316			PD1	15	0.558824	0.176471	0.676471	0.5			Post D1	18	0.576923	0.0384615	0.576923	0.533333
BL	15	0.53125	0.0625	0.625	0.545455			PD1	15	0.534884	0.116279	0.627907	0.531915			Post D1	18	0.56	0.12	0.6	0.521739
BL	15	0.542857	0	0.514286	0.5			PD1	15	0.511628	0.186047	0.674419	0.525			Post D1	18	0.583333	0.04	0.5	0.52
BL	15	0.53125	0.0285714	0.625	0.566667			PD1	15	0.555556	0.177778	0.644444	0.533333			Post D1	18	0.521739	0.0416667	0.565217	0.541667
BL	15	0.515152	0.09375	0.666667	0.6			PD1	15	0.514286	0.114286	0.628571	0.513514			Post D1	18	0.565217	0	0.521739	0.541667
BL	15	0.516129	0	0.645161	0.512821			PD1	15	0.5	0.0882353	0.647059	0.542857			Post D1	18	0.625	0.125	0.541667	0.583333
BL	15	0.5	0.111111	0.583333	0.53125			PD1	15	0.5625	0.1875	0.65625	0.516129			Post D1	18	0.636364	0.0909091	0.636364	0.521739
BL	15	0.526316	0	0.578947	0.619048			PD1	15	0.589744	0.205128	0.692308	0.513514			Post D1	18	0.517241	0.0689655	0.551724	0.5
BL	15	0.512195	0.097561	0.512195	0.527778			PD1	15	0.525	0.2	0.725	0.525			Post D1	18	0.607143	0.166667	0.62069	0.551724
BL	15	0.606061	0.0606061	0.606061	0.645161			PD1	16	0.555556	0.0277778	0.5	0.515152			Post D1	18	0.517241	0.0434783	0.6	0.56
BL	15	0.555556	0	0.555556	0.515152			PD1	16	0.551724	0.0555556	0.62069	0.535714			Post D1	19	0.535714	0.0714286	0.571429	0.5625
BL	15	0.529412	0.0833333	0.617647	0.516129			PD1	16	0.527778	0	0.5	0.526316			Post D1	19	0.566667	0.0333333	0.766667	0.709677
BL	16	0.533333	0.133333	0.566667	0.518519			PD1	16	0.552632	0.157895	0.605263	0.53125			Post D1	19	0.571429	0.0357143	0.5	0.535714
BL	16	0.548387	0.129032	0.612903	0.516129			PD1	16	0.534884	0.0465116	0.604651	0.510638			Post D1	19	0.55	0.0909091	0.55	0.5
BL	16	0.517241	0.137931	0.586207	0.518519			PD1	16	0.5	0.0882353	0.735294	0.578947			Post D1	19	0.5	0	0.545455	0.545455
BL	16	0.514286	0.142857	0.628571	0.5			PD1	16	0.516129	0.0645161	0.548387	0.53125			Post D1	19	0.545455	0	0.590909	0.55
BL	16	0.536585	0.121951	0.536585	0.540541			PD1	16	0.65	0.075	0.525	0.513514			Post D1	19	0.5	0	0.5	0.526316
BL	16	0.527778	0.0833333	0.527778	0.578947			PD1	16	0.5	0	0.526316	0.513514			Post D1	19	0.5	0.05	0.611111	0.555556
BL	16	0.527778	0.0833333	0.555556	0.527778			PD1	16	0.526316	0.105263	0.552632	0.540541			Post D1	19	0.586207	0	0.517241	0.538462
BL	16	0.515152	0.181818	0.606061	0.533333			PD1	16	0.5625	0.09375	0.5625	0.545455			Post D1	19	0.6	0.15	0.55	0.555556
BL	16	0.5	0.107143	0.571429	0.551724			PD1	16	0.516129	0	0.580645	0.5625			Post D1	20	0.625	0.0416667	0.541667	0.538462
BL	16	0.521739	0	0.608696	0.538462			PD1	16	0.5	0.0833333	0.527778	0.515152			Post D1	20	0.625	0.0606061	0.5	0.541667
BL	16	0.5	0.235294	0.558824	0.576923			PD1	17	0.553191	0.0851064	0.617021	0.520833			Post D1	20	0.545455	0.0909091	0.509091	0.54902
BL	16	0.5	0.204545	0.636364	0.568182			PD1	17	0.511628	0.0232558	0.627907	0.565217			Post D1	20	0.533333	0.111111	0.577778	0.533333
BL	16	0.571429	0.25	0.678571	0.6			PD1	17	0.55814	0.116279	0.511628	0.609756			Post D1	20	0.526316	0.184211	0.552632	0.611111
BL	16	0.607143	0.0714286	0.714286	0.545455			PD1	17	0.512821	0.0769231	0.538462	0.560976			Post D1	20	0.64	0.12	0.52	0.590909
BL	17	0.5	0.15	0.625	0.513514			PD1	17	0.578947	0.131579	0.526316	0.558824			Post D1	20	0.5	0	0.65625	0.677419
BL	17	0.538462	0.205128	0.615385	0.567568			PD1	17	0.558824	0.0294118	0.529412	0.558824			Post D1	20	0.575758	0.03125	0.545455	0.5
BL	17	0.540541	0.243243	0.756757	0.527778			PD1	17	0.5	0.03125	0.53125	0.515152			Post D1	20	0.576923	0.0384615	0.538462	0.541667
BL	17	0.5	0.125	0.5625	0.517241			PD1	17	0.512821	0.0769231	0.512821	0.571429			Post D1	20	0.5	0.0384615	0.541667	0.5
BL	17	0.555556	0	0.518519	0.5			PD1	17	0.555556	0.205128	0.666667	0.5			Post D1	20	0.538462	0.0357143	0.538462	0.517241
BL	17	0.5	0.133333	0.566667	0.5			PD1	17	0.538462	0.0384615	0.576923	0.518519			Post D1	20	0.5	0.0714286	0.535714	0.56
BL	17	0.583333	0.194444	0.638889	0.542857			PD1	17	0.533333	0.166667	0.6	0.5
BL	17	0.525	0.025	0.55	0.543478			PD1	18	0.5	0.195652	0.652174	0.5
BL	17	0.531915	0.12766	0.531915	0.604167			PD1	18	0.545455	0.0681818	0.590909	0.54
BL	17	0.510204	0.0222222	0.591837	0.535714			PD1	18	0.516129	0.0967742	0.580645	0.516129
BL	17	0.511111	0.0888889	0.555556	0.525			PD1	18	0.548387	0.0967742	0.580645	0.516129
BL	17	0.55814	0.0232558	0.72093	0.652174			PD1	18	0.553191	0.12766	0.638298	0.510638
BL	17	0.571429	0.0952381	0.52381	0.538462			PD1	18	0.545455	0.136364	0.590909	0.545455
BL	17	0.526316	0.0526316	0.5	0.575			PD1	18	0.5625	0.0625	0.65625	0.575758
BL	18	0.548387	0	0.645161	0.526316			PD1	18	0.548387	0.0967742	0.612903	0.533333
BL	18	0.511111	0.155556	0.666667	0.605263			PD1	18	0.606061	0.0606061	0.515152	0.558824
BL	18	0.588235	0.264706	0.735294	0.5			PD1	18	0.542857	0.114286	0.571429	0.515152
BL	18	0.5	0.0625	0.65625	0.542857			PD1	18	0.5	0.09375	0.65625	0.529412
BL	18	0.5	0.09375	0.59375	0.516129			PD1	18	0.542857	0.114286	0.571429	0.529412
BL	18	0.5	0.238095	0.642857	0.514286			PD1	19	0.529412	0.176471	0.647059	0.515152
BL	18	0.5	0.09375	0.53125	0.575758			PD1	19	0.529412	0.0588235	0.617647	0.5
BL	18	0.564103	0.102564	0.666667	0.578947			PD1	19	0.515152	0.030303	0.69697	0.647059
BL	18	0.55814	0.139535	0.534884	0.658537			PD1	19	0.535714	0.0714286	0.571429	0.518519
BL	18	0.578947	0.131579	0.736842	0.657143			PD1	19	0.571429	0.0357143	0.607143	0.571429
BL	18	0.555556	0.138889	0.583333	0.555556			PD1	19	0.583333	0.111111	0.5	0.575758
BL	18	0.59375	0	0.53125	0.5			PD1	19	0.56	0.04	0.6	0.538462
BL	18	0.586957	0.0625	0.782609	0.727273			PD1	19	0.548387	0.0322581	0.612903	0.580645
BL	18	0.514286	0.114286	0.714286	0.583333			PD1	19	0.53125	0.40625	0.90625	0.583333
BL	19	0.6	0.125	0.75	0.595238			PD1	19	0.5	0.46875	0.875	0.529412
BL	19	0.5	0.03125	0.65625	0.555556			PD1	19	0.548387	0.0645161	0.548387	0.555556
BL	19	0.527778	0.166667	0.666667	0.580645			PD1	19	0.535714	0.0645161	0.571429	0.5
BL	19	0.533333	0.121212	0.533333	0.514286			PD1	20	0.515152	0.0909091	0.606061	0.53125
BL	19	0.606061	0.0909091	0.515152	0.538462			PD1	20	0.513514	0.135135	0.621622	0.514286
BL	19	0.5	0.1	0.6	0.535714			PD1	20	0.5	0	0.558824	0.512821
BL	19	0.5	0.166667	0.7	0.571429			PD1	20	0.515152	0.027027	0.545455	0.527778
BL	19	0.65625	0.15625	0.5	0.576923			PD1	20	0.540541	0.027027	0.540541	0.542857
BL	19	0.517241	0.206897	0.724138	0.576923			PD1	20	0.592593	0.148148	0.574074	0.510638
BL	19	0.555556	0.194444	0.75	0.571429			PD1	20	0.515152	0	0.545455	0.529412
BL	19	0.535714	0.0714286	0.642857	0.551724			PD1	20	0.548387	0	0.516129	0.516129
BL	19	0.515152	0.0606061	0.575758	0.515152			PD1	20	0.538462	0.0512821	0.564103	0.540541
BL	20	0.515152	0.030303	0.575758	0.529412			PD1	20	0.5	0.0588235	0.588235	0.529412
BL	20	0.529412	0.0882353	0.617647	0.5625
BL	20	0.552632	0.131579	0.684211	0.567568
BL	20	0.578947	0.105263	0.578947	0.538462
BL	20	0.525	0.05	0.65	0.6
BL	20	0.525	0.1	0.6	0.526316
BL	20	0.576923	0.115385	0.615385	0.518519
BL	20	0.518519	0.037037	0.62963	0.551724
BL	20	0.533333	0	0.533333	0.548387
BL	20	0.514286	0.0285714	0.514286	0.515152
BL	20	0.580645	0.0967742	0.612903	0.529412
BL	20	0.551724	0.0689655	0.551724	0.533333
	Average	0.544704	0.0995533	0.600969	0.549528				Average	0.545718	0.0978571	0.594599	0.538139				Average	0.56782	0.0801013	0.565652	0.542765				Average	0.56065	0.0625627	0.575775	0.554047
	St. Deviation	0.0395159	0.0724851	0.0708365	0.0416379				St. Deviation	0.0344406	0.0768543	0.0736045	0.0307939				St. Deviation	0.0594981	0.0623541	0.0552696	0.0357314				St. Deviation	0.0473679	0.054696	0.0619355	0.0446686
	Total Number Steps	249	249	249	249				Total Number Steps	238	238	238	238				Total Number Steps	203	203	203	203				Total Number Steps	82	82	82	82
	# of steps outside 2 S.D.	6	18	21	17				# of steps outside 2 S.D.	3	8	11	5				# of steps outside 2 S.D.	19	3	2	4				# of steps outside 2 S.D.	4	1	3	6

## Sheet: Pre-Injury Dox Phase - Acrylic
Time point	Animal ID	Hindlimb Phase	Heterolateral Phase	Homolateral Phase	Forelimb Phase			Time point	Animal ID	Hindlimb Phase	Heterolateral Phase	Homolateral Phase	Forelimb Phase			Time point	Animal ID	Hindlimb Phase	Heterolateral Phase	Homolateral Phase	Forelimb Phase			Time point	Animal ID	Hindlimb Phase	Heterolateral Phase	Homolateral Phase	Forelimb Phase			Time point	Animal ID	Hindlimb Phase	Heterolateral Phase	Homolateral Phase	Forelimb Phase
D1D5	2	0.536	0.071	0.571	0.517			D1D8	2	0.583333	0.208333	0.625	0.52381			D2D5	5	0.515152	0.0909091	0.545455	0.583333			D2D8	5	0.571429	0.0714286	0.607143	0.5			D2D13	5	0.5	0.0526316	0.5	0.564103
D1D5	2	0.5	0.0416667	0.5	0.56			D1D8	2	0.541667	0.208333	0.75	0.541667			D2D5	5	0.586207	0.172414	0.586207	0.555556			D2D8	5	0.571429	0.142857	0.571429	0.538462			D2D13	5	0.516129	0.0967742	0.548387	0.533333
D1D5	2	0.62069	0.241379	0.586207	0.6			D1D8	2	0.607143	0.142857	0.607143	0.551724			D2D5	5	0.583333	0.125	0.541667	0.545455			D2D8	5	0.666667	0.208333	0.583333	0.590909			D2D13	5	0.512821	0.0769231	0.512821	0.564103
D1D5	2	0.757576	0.242424	0.848485	0.625			D1D8	2	0.535714	0.142857	0.678571	0.535714			D2D5	5	0.619048	0.190476	0.619048	0.55			D2D8	5	0.76	0.32	0.64	0.636364			D2D13	5	0.5	0	0.5625	0.514286
D1D5	2	0.5	0.294118	0.705882	0.5625			D1D8	2	0.576923	0.192308	0.615385	0.56			D2D5	5	0.555556	0	0.518519	0.56			D2D8	5	0.535714	0	0.5	0.518519			D2D13	5	0.708333	0.291667	0.625	0.619048
D1D5	2	0.571429	0.214286	0.642857	0.52			D1D8	2	0.666667	0.166667	0.625	0.56			D2D5	5	0.666667	0.0740741	0.541667	0.565217			D2D8	5	0.583333	0.0357143	0.583333	0.533333			D2D13	5	0.8	0.0606061	0.72	0.588235
D1D5	2	0.64	0.08	0.52	0.565217			D1D8	2	0.592593	0.185185	0.592593	0.541667			D2D5	5	0.576923	0.0384615	0.538462	0.551724			D2D8	5	0.571429	0	0.535714	0.52			D2D13	5	0.607143	0.0357143	0.5	0.535714
D1D5	2	0.692308	0.115385	0.5	0.615385			D1D8	2	0.607143	0.142857	0.714286	0.551724			D2D5	5	0.538462	0.115385	0.5	0.545455			D2D8	5	0.666667	0.107143	0.62963	0.518519			D2D13	5	0.515152	0.030303	0.515152	0.5
D1D5	2	0.681818	0.0909091	0.5	0.590909			D1D8	2	0.53125	0.1875	0.5625	0.586207			D2D5	5	0.521739	0.0434783	0.565217	0.5			D2D8	5	0.653846	0.269231	0.576923	0.619048			D2D13	5	0.607143	0.142857	0.607143	0.5
D1D5	3	0.526316	0.0789474	0.657895	0.5			D1D8	2	0.612903	0.193548	0.709677	0.516129			D2D5	5	0.56	0.08	0.52	0.541667			D2D8	5	0.791667	0.333333	0.75	0.565217			D2D13	5	0.558824	0	0.529412	0.526316
D1D5	3	0.571429	0.0714286	0.571429	0.517241			D1D8	2	0.541667	0	0.541667	0.521739			D2D5	6	0.619048	0	0.52381	0.545455			D2D8	5	0.576923	0.0384615	0.5	0.555556			D2D13	5	0.552632	0.105263	0.578947	0.62069
D1D5	3	0.5	0.166667	0.566667	0.555556			D1D8	2	0.5	0.0416667	0.590909	0.6			D2D5	6	0.619048	0	0.52381	0.545455			D2D8	5	0.535714	0.0714286	0.535714	0.518519			D2D13	6	0.515152	0.030303	0.69697	0.628571
D1D5	3	0.5	0.0714286	0.535714	0.541667			D1D8	3	0.636364	0.136364	0.545455	0.571429			D2D5	6	0.666667	0.0476191	0.52381	0.571429			D2D8	6	0.583333	0.0833333	0.625	0.541667			D2D13	6	0.6	0.0666667	0.666667	0.62069
D1D5	3	0.652174	0.0714286	0.521739	0.541667			D1D8	3	0.714286	0.190476	0.619048	0.55			D2D5	6	0.6	0	0.6	0.571429			D2D8	6	0.52	0.04	0.56	0.5			D2D13	6	0.533333	0.1	0.633333	0.533333
D1D5	3	0.580645	0.0645161	0.548387	0.5			D1D8	3	0.538462	0	0.538462	0.52			D2D5	6	0.736842	0	0.526316	0.571429			D2D8	6	0.619048	0	0.571429	0.590909			D2D13	6	0.5	0.15625	0.625	0.5
D1D5	3	0.555556	0.037037	0.518519	0.571429			D1D8	3	0.541667	0.0384615	0.541667	0.52			D2D5	6	0.833333	0.111111	0.611111	0.571429			D2D8	6	0.666667	0.0416667	0.541667	0.6			D2D13	6	0.586207	0.0689655	0.586207	0.516129
D1D5	3	0.714286	0.142857	0.52381	0.631579			D1D8	3	0.515152	0.030303	0.545455	0.53125			D2D5	6	0.684211	0	0.526316	0.590909			D2D8	6	0.55	0	0.575	0.564103			D2D13	6	0.555556	0.194444	0.583333	0.548387
D1D5	3	0.625	0.0416667	0.5	0.56			D1D8	3	0.538462	0	0.538462	0.5			D2D5	6	0.809524	0.142857	0.52381	0.6			D2D8	6	0.517241	0.025	0.62069	0.555556			D2D13	6	0.56	0	0.56	0.56
D1D5	3	0.625	0.125	0.583333	0.521739			D1D8	3	0.52	0.0769231	0.56	0.52			D2D5	6	0.684211	0	0.526316	0.571429			D2D8	6	0.5	0	0.576923	0.555556			D2D13	6	0.571429	0	0.607143	0.576923
D1D5	3	0.6	0.12	0.56	0.56			D1D8	3	0.52	0	0.56	0.56			D2D5	7	0.625	0.0833333	0.625	0.52			D2D8	6	0.586207	0.0344828	0.586207	0.571429			D2D13	6	0.555556	0.037037	0.62963	0.551724
D1D5	3	0.636364	0	0.590909	0.52			D1D8	3	0.555556	0	0.518519	0.52			D2D5	7	0.842105	0.315789	0.526316	0.75			D2D8	6	0.52	0.04	0.56	0.518519			D2D13	6	0.607143	0.0714286	0.642857	0.592593
D1D5	3	0.5	0.0769231	0.538462	0.5			D1D8	3	0.541667	0	0.541667	0.521739			D2D5	7	0.541667	0	0.541667	0.619048			D2D8	6	0.6	0.04	0.56	0.52			D2D13	6	0.625	0.0833333	0.541667	0.571429
D1D5	4	0.548387	0.129032	0.580645	0.588235			D1D8	3	0.652174	0.0416667	0.521739	0.545455			D2D5	7	0.789474	0.125	0.526316	0.705882			D2D8	6	0.518519	0.0740741	0.62963	0.517241			D2D13	6	0.583333	0.0416667	0.583333	0.576923
D1D5	4	0.586207	0.103448	0.551724	0.566667			D1D8	4	0.5	0.0833333	0.555556	0.617647			D2D5	7	0.727273	0.181818	0.590909	0.590909			D2D8	6	0.516129	0.129032	0.612903	0.517241			D2D13	7	0.619048	0.0952381	0.619048	0.541667
D1D5	4	0.517241	0.0344828	0.517241	0.548387			D1D8	4	0.517241	0.0689655	0.517241	0.566667			D2D5	7	0.809524	0.238095	0.52381	0.736842			D2D8	7	0.64	0.16	0.64	0.538462			D2D13	7	0.64	0.16	0.56	0.583333
D1D5	4	0.571429	0.142857	0.571429	0.52			D1D8	4	0.555556	0.0740741	0.555556	0.518519			D2D5	7	0.888889	0.333333	0.611111	0.705882			D2D8	7	0.809524	0.238095	0.571429	0.681818			D2D13	7	0.636364	0.0909091	0.681818	0.541667
D1D5	4	0.516129	0.0322581	0.516129	0.555556			D1D8	4	0.551724	0.103448	0.551724	0.535714			D2D5	7	0.8	0.3	0.55	0.722222			D2D8	7	0.583333	0.208333	0.541667	0.636364			D2D13	7	0.772727	0.363636	0.590909	0.705882
D1D5	4	0.59375	0.0967742	0.65625	0.548387			D1D8	4	0.6	0.12	0.6	0.52			D2D5	8	0.515152	0.030303	0.575758	0.518519			D2D8	7	0.772727	0.227273	0.545455	0.681818			D2D13	7	0.809524	0.428571	0.809524	0.6
D1D5	4	0.526316	0.210526	0.657895	0.53125			D1D8	4	0.592593	0.0740741	0.666667	0.592593			D2D5	8	0.645161	0.151515	0.580645	0.580645			D2D8	7	0.782609	0.304348	0.565217	0.684211			D2D13	7	0.583333	0.166667	0.583333	0.565217
D1D5	4	0.571429	0.171429	0.628571	0.567568			D1D8	4	0.545455	0.0909091	0.515152	0.5625			D2D5	8	0.764706	0.117647	0.529412	0.611111			D2D8	7	0.666667	0.208333	0.541667	0.6			D2D13	7	0.714286	0.142857	0.571429	0.571429
D1D5	4	0.514286	0.0285714	0.514286	0.516129			D1D8	4	0.551724	0.0689655	0.517241	0.535714			D2D5	8	0.736842	0.263158	0.631579	0.611111			D2D8	7	0.65	0.15	0.6	0.608696			D2D13	7	0.76	0.44	0.68	0.647059
D1D5	4	0.5	0.0857143	0.6	0.517241			D1D8	4	0.555556	0.0740741	0.555556	0.518519			D2D5	8	0.842105	0.368421	0.578947	0.777778			D2D8	7	0.586207	0.137931	0.551724	0.555556			D2D13	7	0.857143	0.285714	0.52381	0.764706
D1D5	4	0.514286	0.0857143	0.542857	0.551724			D1D8	4	0.64	0.12	0.56	0.541667			D2D5	8	0.888889	0.333333	0.666667	0.684211			D2D8	7	0.6	0.133333	0.633333	0.5			D2D13	7	1	0.388889	0.611111	0.722222
D1D5	4	0.586207	0.0857143	0.62069	0.518519			D1D8	5	0.514286	0.0857143	0.657143	0.540541			D2D5	8	1	0.375	0.5	0.8			D2D8	7	0.566667	0.0333333	0.6	0.53125			D2D13	8	0.583333	0.0416667	0.583333	0.518519
D1D5	5	0.529412	0.0294118	0.588235	0.513514			D1D8	5	0.529412	0.117647	0.558824	0.545455			D2D5	8	0.882353	0.352941	0.529412	1			D2D8	7	0.566667	0.03125	0.7	0.6875			D2D13	8	0.652174	0.217391	0.608696	0.590909
D1D5	5	0.558824	0.0882353	0.588235	0.53125			D1D8	5	0.580645	0.0645161	0.516129	0.533333			D2D5	8	0.7	0.15	0.65	1			D2D8	7	0.894737	0.315789	0.631579	0.684211			D2D13	8	0.772727	0.272727	0.636364	0.619048
D1D5	5	0.529412	0.147059	0.588235	0.53125			D1D8	5	0.566667	0.0333333	0.5	0.517241			D2D5	8	0.65	0.15	0.6	0.6			D2D8	8	0.645161	0.258065	0.612903	0.56			D2D13	8	0.7	0.25	0.6	0.631579
D1D5	5	0.621622	0.0810811	0.513514	0.594595			D1D8	5	0.517241	0.0689655	0.551724	0.5			D2D5	8	0.947368	0.473684	0.631579	0.842105			D2D8	8	0.566667	0.2	0.566667	0.65625			D2D13	8	1	0.375	0.5625	0.75
D1D5	5	0.666667	0.0909091	0.515152	0.575758			D1D8	5	0.517241	0.0344828	0.586207	0.533333			D2D5	13	0.714286	0.142857	0.52381	0.6			D2D8	8	0.645161	0.129032	0.516129	0.636364			D2D13	8	0.52	0	0.6	0.6
D1D5	5	0.55	0	0.625	0.571429			D1D8	5	0.555556	0.0555556	0.527778	0.552632			D2D5	13	0.666667	0.0952381	0.52381	0.55			D2D8	8	0.763636	0.2	0.636364	0.545455			D2D13	8	0.583333	0.0416667	0.5	0.55
D1D5	5	0.632653	0.125	0.510204	0.557692			D1D8	5	0.565217	0.0869565	0.521739	0.588235			D2D5	13	0.541667	0.44	0.541667	0.517241			D2D8	8	0.548387	0	0.516129	0.533333			D2D13	8	0.894737	0.368421	0.631579	0.761905
D1D5	5	0.522727	0.0408163	0.545455	0.65			D1D8	5	0.6	0	0.571429	0.583333			D2D5	13	0.55	0.05	0.5	0.571429			D2D8	8	0.809524	0.190476	0.619048	0.625			D2D13	8	0.941176	0.352941	0.529412	0.875
D1D5	5	0.6	0.228571	0.628571	0.736842			D1D8	5	0.612903	0.0322581	0.548387	0.638889			D2D5	13	0.894737	0.315789	0.631579	0.666667			D2D8	8	0.636364	0.227273	0.590909	0.6			D2D13	8	0.9	0.3	0.6	0.894737
D1D5	5	0.857143	0.228571	0.642857	0.6			D1D8	5	0.56	0.12	0.52	0.583333			D2D5	13	0.578947	0.0526316	0.526316	0.55			D2D8	8	0.9	0.25	0.55	0.684211			D2D13	13	0.55	0	0.55	0.5
D1D5	5	0.571429	0.0526316	0.542857	0.511628			D1D8	5	0.615385	0.0384615	0.576923	0.5			D2D5	13	0.941176	0.294118	0.588235	0.705882			D2D8	8	0.818182	0.181818	0.5	0.695652			D2D13	13	0.9	0.0588235	0.529412	0.652174
D1D5	5	0.526316	0.0263158	0.552632	0.542857			D1D8	6	0.551724	0.0689655	0.62069	0.5			D2D5	13	0.85	0.25	0.55	0.666667			D2D8	8	0.8	0.35	0.55	0.764706			D2D13	13	0.652174	0.130435	0.565217	0.583333
D1D5	6	0.536585	0.146341	0.707317	0.511111			D1D8	6	0.56	0.04	0.56	0.5			D2D5	13	0.65	0	0.5	0.555556			D2D8	8	0.888889	0.333333	0.722222	0.631579			D2D13	13	0.5	0.0833333	0.5	0.52381
D1D5	6	0.545455	0.0606061	0.636364	0.513514			D1D8	6	0.575758	0.121212	0.606061	0.516129			D2D5	13	0.736842	0.1	0.526316	0.578947			D2D8	13	0.73913	0.130435	0.521739	0.608696			D2D13	13	0.736842	0.105263	0.526316	0.619048
D1D5	6	0.580645	0.0967742	0.580645	0.5			D1D8	6	0.580645	0	0.612903	0.555556			D2D5	14	0.5	0	0.5	0.56			D2D8	13	0.608696	0.0869565	0.565217	0.521739			D2D13	13	0.652174	0.0869565	0.521739	0.583333
D1D5	6	0.666667	0	0.541667	0.576923			D1D8	6	0.53125	0	0.5625	0.545455			D2D5	14	0.625	0.107143	0.583333	0.565217			D2D8	13	0.555556	0.037037	0.592593	0.5			D2D13	13	0.615385	0.115385	0.538462	0.5
D1D5	6	0.586207	0.0689655	0.517241	0.5			D1D8	6	0.571429	0.0357143	0.535714	0.518519			D2D5	14	0.518519	0	0.555556	0.6			D2D8	13	0.727273	0.181818	0.545455	0.652174			D2D13	13	0.941176	0.470588	0.647059	0.764706
D1D5	6	0.510204	0.163265	0.673469	0.595238			D1D8	6	0.62069	0.103448	0.517241	0.576923			D2D5	14	0.583333	0.0740741	0.583333	0.545455			D2D8	13	0.52	0.04	0.52	0.541667			D2D13	13	0.636364	0.0454546	0.545455	0.608696
D1D5	6	0.538462	0.102564	0.666667	0.511628			D1D8	6	0.535714	0	0.607143	0.521739			D2D5	14	0.5	0.0714286	0.607143	0.535714			D2D8	13	0.6	0	0.6	0.6			D2D13	13	0.652174	0.130435	0.608696	0.521739
D1D5	6	0.525	0.2	0.65	0.5			D1D8	6	0.608696	0.173913	0.782609	0.538462			D2D5	14	0.533333	0.1	0.5	0.586207			D2D8	13	0.608696	0.130435	0.565217	0.545455			D2D13	14	0.5	0.175	0.575	0.567568
D1D5	6	0.538462	0.0769231	0.576923	0.5			D1D8	6	0.617647	0.0294118	0.735294	0.648649			D2D5	14	0.592593	0.111111	0.592593	0.518519			D2D8	13	0.85	0.3	0.6	0.666667			D2D13	14	0.578947	0.105263	0.605263	0.536585
D1D5	6	0.535714	0.142857	0.678571	0.576923			D1D8	6	0.5	0.1	0.6	0.53125			D2D5	14	0.714286	0.142857	0.52381	0.6			D2D8	14	0.517241	0.137931	0.62069	0.5			D2D13	14	0.545455	0.151515	0.545455	0.580645
D1D5	6	0.5	0.0714286	0.535714	0.518519			D1D8	6	0.5	0.178571	0.535714	0.515152			D2D5	14	0.8	0.15	0.55	0.6			D2D8	14	0.566667	0.133333	0.6	0.533333			D2D13	14	0.586207	0.172414	0.586207	0.586207
D1D5	6	0.606061	0.121212	0.636364	0.548387			D1D8	7	0.636364	0.0909091	0.545455	0.619048			D2D5	14	0.535714	0.0357143	0.535714	0.521739			D2D8	14	0.633333	0.1	0.6	0.516129			D2D13	14	0.636364	0.181818	0.636364	0.52381
D1D5	6	0.586207	0	0.586207	0.6			D1D8	7	0.619048	0.0952381	0.52381	0.571429			D2D5	14	0.727273	0.142857	0.590909	0.590909			D2D8	14	0.513514	0.108108	0.513514	0.594595			D2D13	14	0.708333	0.208333	0.666667	0.521739
D1D5	6	0.612903	0.0322581	0.516129	0.517241			D1D8	7	0.5	0.09375	0.53125	0.588235			D2D5	14	0.52	0.04	0.52	0.521739			D2D8	14	0.517241	0.0689655	0.586207	0.516129			D2D13	14	0.62963	0.148148	0.555556	0.576923
D1D5	7	0.52	0	0.6	0.545455			D1D8	7	0.529412	0.147059	0.588235	0.594595			D2D5	14	0.576923	0.04	0.5	0.5			D2D8	14	0.575758	0.212121	0.818182	0.714286			D2D13	14	0.666667	0.208333	0.625	0.565217
D1D5	7	0.590909	0.12	0.590909	0.545455			D1D8	7	0.62069	0.0357143	0.517241	0.558824			D2D5	17	0.555556	0.185185	0.62963	0.52			D2D8	14	0.514286	0.0285714	0.514286	0.515152			D2D13	14	0.535714	0	0.535714	0.5
D1D5	7	0.541667	0	0.5	0.571429			D1D8	7	0.516129	0.0645161	0.548387	0.6			D2D5	17	0.5	0.0333333	0.5	0.518519			D2D8	14	0.543478	0.0285714	0.630435	0.538462			D2D13	14	0.5	0.0714286	0.576923	0.535714
D1D5	7	0.7	0.1	0.55	0.590909			D1D8	7	0.642857	0.234286	0.535714	0.545455			D2D5	17	0.555556	0.037037	0.518519	0.518519			D2D8	14	0.540541	0.173913	0.621622	0.55			D2D13	14	0.567568	0	0.648649	0.59375
D1D5	7	0.619048	0.142857	0.571429	0.571429			D1D8	7	0.518519	0.111111	0.592593	0.52			D2D5	17	0.518519	0.037037	0.555556	0.518519			D2D8	14	0.666667	0.208333	0.625	0.565217			D2D13	14	0.615385	0.192308	0.615385	0.521739
D1D5	7	0.518519	0.0740741	0.592593	0.518519			D1D8	7	0.529412	0.0882353	0.588235	0.5			D2D5	17	0.5	0	0.535714	0.517241			D2D8	14	0.580645	0.0322581	0.516129	0.5			D2D13	14	0.653846	0.115385	0.653846	0.5
D1D5	7	0.52	0.08	0.56	0.52			D1D8	8	0.56	0.12	0.6	0.538462			D2D5	17	0.529412	0.0882353	0.588235	0.548387			D2D8	14	0.516129	0	0.548387	0.538462			D2D13	17	0.555556	0	0.518519	0.517241
D1D5	7	0.5	0.0833333	0.541667	0.541667			D1D8	8	0.592593	0.111111	0.592593	0.518519			D2D5	17	0.518519	0	0.518519	0.538462			D2D8	14	0.541667	0.0416667	0.583333	0.5			D2D13	17	0.56	0.08	0.72	0.533333
D1D5	7	0.565217	0	0.521739	0.521739			D1D8	8	0.545455	0.0606061	0.575758	0.5			D2D5	17	0.615385	0.0384615	0.5	0.538462			D2D8	14	0.518519	0.0740741	0.518519	0.538462			D2D13	17	0.5	0.0333333	0.533333	0.516129
D1D5	7	0.5	0.0416667	0.583333	0.541667			D1D8	8	0.53125	0.0625	0.5625	0.5			D2D5	17	0.517241	0.0344828	0.517241	0.5			D2D8	17	0.538462	0.0384615	0.5	0.538462			D2D13	17	0.521739	0	0.521739	0.541667
D1D5	7	0.571429	0.142857	0.571429	0.526316			D1D8	8	0.53125	0.0625	0.53125	0.516129			D2D5	18	0.571429	0.0952381	0.619048	0.52381			D2D8	17	0.516129	0.0322581	0.548387	0.535714			D2D13	17	0.521739	0.0434783	0.521739	0.5
D1D5	8	0.551724	0.0689655	0.517241	0.551724			D1D8	8	0.575758	0.181818	0.575758	0.551724			D2D5	18	0.666667	0.291667	0.666667	0.571429			D2D8	17	0.533333	0	0.5	0.516129			D2D13	17	0.5	0.037037	0.5	0.5
D1D5	8	0.516129	0.0645161	0.645161	0.580645			D1D8	8	0.518519	0.037037	0.518519	0.52			D2D5	18	0.708333	0.291667	0.75	0.541667			D2D8	17	0.551724	0.0344828	0.517241	0.533333			D2D13	17	0.518519	0.0740741	0.518519	0.5
D1D5	8	0.56	0.04	0.6	0.518519			D1D8	8	0.5	0.037037	0.5	0.5			D2D5	18	0.526316	0.0526316	0.526316	0.526316			D2D8	17	0.53125	0	0.5	0.516129			D2D13	17	0.516129	0	0.516129	0.5
D1D5	8	0.517241	0.0344828	0.517241	0.5			D1D8	8	0.5	0.0714286	0.535714	0.535714			D2D5	18	0.714286	0.190476	0.571429	0.619048			D2D8	17	0.545455	0.03125	0.515152	0.515152			D2D13	17	0.571429	0.0952381	0.571429	0.52381
D1D5	8	0.533333	0	0.5	0.516129			D1D8	8	0.518519	0.0740741	0.592593	0.518519			D2D5	18	0.5	0	0.538462	0.538462			D2D8	17	0.535714	0.0322581	0.5	0.5			D2D13	18	0.636364	0.136364	0.545455	0.571429
D1D5	8	0.571429	0.0714286	0.571429	0.5625			D1D8	8	0.533333	0.0666667	0.5	0.5			D2D5	18	0.64	0.2	0.64	0.521739			D2D8	17	0.516129	0.0645161	0.516129	0.5			D2D13	18	0.7	0.2	0.6	0.578947
D1D5	8	0.5	0.0357143	0.5	0.551724			D1D8	8	0.5	0.0666667	0.576923	0.535714			D2D5	18	0.521739	0.0434783	0.521739	0.541667			D2D8	17	0.517241	0.0689655	0.517241	0.535714			D2D13	18	0.55	0	0.5	0.52381
D1D5	8	0.517241	0	0.517241	0.5			D1D8	9	0.5	0.0666667	0.666667	0.62069			D2D5	18	0.571429	0.0952381	0.619048	0.52381			D2D8	17	0.517241	0.0689655	0.551724	0.5			D2D13	18	0.541667	0.0416667	0.583333	0.52
D1D5	8	0.5	0.0344828	0.6	0.551724			D1D8	9	0.538462	0.115385	0.538462	0.64			D2D5	18	0.652174	0.190476	0.636364	0.545455			D2D8	17	0.5625	0.125	0.5625	0.533333			D2D13	18	0.516129	0	0.516129	0.515152
D1D5	8	0.538462	0	0.538462	0.52			D1D8	9	0.608696	0.0869565	0.565217	0.545455			D2D5	18	0.695652	0.291667	0.727273	0.590909			D2D8	18	0.517241	0.0689655	0.551724	0.5			D2D13	18	0.517241	0.103448	0.517241	0.576923
D1D5	8	0.52	0.0384615	0.56	0.521739			D1D8	9	0.652174	0.130435	0.565217	0.5			D2D5	18	0.55	0.0526316	0.526316	0.526316			D2D8	18	0.636364	0.0909091	0.590909	0.521739			D2D13	18	0.583333	0.166667	0.583333	0.565217
D1D5	9	0.545455	0	0.5	0.578947			D1D8	9	0.5	0	0.545455	0.52											D2D8	18	0.521739	0.0434783	0.565217	0.521739			D2D13	18	0.5	0	0.538462	0.5
D1D5	9	0.65	0.136364	0.6	0.52381			D1D8	9	0.526316	0.08	0.631579	0.65											D2D8	18	0.555556	0.037037	0.555556	0.5			D2D13	18	0.565217	0.0434783	0.565217	0.55
D1D5	9	0.575	0.05	0.575	0.512195			D1D8	9	0.538462	0	0.538462	0.56											D2D8	18	0.692308	0.148148	0.692308	0.545455			D2D13	18	0.541667	0	0.541667	0.52381
D1D5	9	0.540541	0.162162	0.648649	0.545455			D1D8	9	0.56	0.0384615	0.56	0.5											D2D8	18	0.5	0.0714286	0.535714	0.518519
D1D5	9	0.608696	0.0434783	0.521739	0.521739			D1D8	9	0.583333	0.0416667	0.5	0.541667											D2D8	18	0.5	0	0.5	0.5
D1D5	9	0.625	0.0833333	0.583333	0.521739			D1D8	9	0.565217	0.0434783	0.521739	0.521739											D2D8	18	0.52	0	0.52	0.5
D1D5	9	0.541667	0.0416667	0.583333	0.541667			D1D8	9	0.545455	0	0.545455	0.571429
D1D5	9	0.541667	0.0416667	0.541667	0.521739			D1D8	10	0.576923	0.0769231	0.576923	0.52
D1D5	9	0.571429	0.0476191	0.52381	0.52381			D1D8	10	0.608696	0.0434783	0.652174	0.583333
D1D5	9	0.636364	0.0909091	0.545455	0.52381			D1D8	10	0.5	0.138889	0.75	0.611111
D1D5	10	0.53125	0.125	0.59375	0.53125			D1D8	10	0.542857	0.0857143	0.685714	0.583333
D1D5	10	0.535714	0.0714286	0.607143	0.5			D1D8	10	0.5	0.227273	0.659091	0.513514
D1D5	10	0.5	0.107143	0.642857	0.555556			D1D8	10	0.529412	0.117647	0.617647	0.527778
D1D5	10	0.64	0	0.6	0.583333			D1D8	10	0.529412	0.205882	0.676471	0.516129
D1D5	10	0.551724	0.04	0.586207	0.518519			D1D8	10	0.526316	0.210526	0.710526	0.513514
D1D5	10	0.515152	0.181818	0.606061	0.5			D1D8	10	0.551724	0.172414	0.655172	0.548387
D1D5	10	0.5	0.0384615	0.692308	0.548387			D1D8	10	0.52	0.16	0.72	0.538462
D1D5	10	0.542857	0.0857143	0.542857	0.515152			D1D8	10	0.517241	0.172414	0.689655	0.517241
D1D5	10	0.517241	0.103448	0.62069	0.517241			D1D8	10	0.518519	0.111111	0.703704	0.551724
D1D5	10	0.538462	0.192308	0.615385	0.541667			D1D8	11	0.529412	0.0588235	0.558824	0.5
D1D5	10	0.53125	0.125	0.59375	0.545455			D1D8	11	0.515152	0	0.545455	0.514286
D1D5	10	0.53125	0.09375	0.59375	0.533333			D1D8	11	0.512195	0.097561	0.560976	0.525
D1D5	10	0.515152	0.151515	0.636364	0.516129			D1D8	11	0.542857	0.142857	0.571429	0.558824
D1D5	11	0.513514	0.0263158	0.567568	0.511111			D1D8	11	0.590909	0.113636	0.636364	0.534884
D1D5	11	0.5	0.0789474	0.526316	0.5			D1D8	11	0.534884	0.0697674	0.55814	0.533333
D1D5	11	0.585366	0	0.512195	0.512821			D1D8	11	0.555556	0.111111	0.611111	0.529412
D1D5	11	0.529412	0.0487805	0.529412	0.514286			D1D8	11	0.585366	0.121951	0.682927	0.575
D1D5	11	0.558824	0	0.5	0.53125			D1D8	11	0.54	0.12	0.68	0.54902
D1D5	11	0.606061	0.0588235	0.575758	0.5			D1D8	11	0.571429	0.0238095	0.547619	0.531915
D1D5	11	0.5	0	0.533333	0.5			D1D8	11	0.518519	0.148148	0.555556	0.531915
D1D5	11	0.548387	0.0645161	0.548387	0.517241			D1D8	11	0.514286	0.0285714	0.571429	0.512821
D1D5	11	0.5	0.0344828	0.617647	0.52381			D1D8	11	0.526316	0.0526316	0.631579	0.594595
D1D5	11	0.551724	0	0.517241	0.5			D1D8	12	0.633333	0.03125	0.666667	0.636364
D1D5	11	0.5	0.0681818	0.590909	0.511111			D1D8	12	0.5625	0.03125	0.5	0.5
D1D5	11	0.5	0.157895	0.605263	0.514286			D1D8	12	0.52	0	0.52	0.535714
D1D5	12	0.515152	0.0333333	0.515152	0.552632			D1D8	12	0.545455	0.181818	0.636364	0.555556
D1D5	12	0.566667	0.0666667	0.5	0.518519			D1D8	12	0.516129	0.0322581	0.516129	0.517241
D1D5	12	0.555556	0.111111	0.518519	0.56			D1D8	12	0.52	0.04	0.52	0.521739
D1D5	12	0.608696	0.217391	0.608696	0.571429			D1D8	12	0.521739	0.04	0.521739	0.5
D1D5	12	0.555556	0.148148	0.518519	0.583333			D1D8	12	0.5	0	0.541667	0.5
D1D5	12	0.580645	0.193548	0.645161	0.517241			D1D8	12	0.551724	0.103448	0.517241	0.555556
D1D5	12	0.714286	0.2	0.571429	0.551724			D1D8	12	0.56	0.04	0.56	0.518519
D1D5	12	0.576923	0	0.5	0.5			D1D8	13	0.540541	0.153846	0.594595	0.619048
D1D5	12	0.608696	0.0869565	0.521739	0.565217			D1D8	13	0.615385	0	0.615385	0.52
D1D5	13	0.695652	0.173913	0.565217	0.590909			D1D8	13	0.533333	0	0.533333	0.516129
D1D5	13	0.541667	0	0.625	0.625			D1D8	13	0.518519	0.037037	0.592593	0.615385
D1D5	13	0.5625	0	0.5	0.516129			D1D8	13	0.586207	0.0689655	0.689655	0.6
D1D5	13	0.594595	0.162162	0.621622	0.515152			D1D8	13	0.513514	0.027027	0.513514	0.552632
D1D5	13	0.6	0.0666667	0.5	0.566667			D1D8	13	0.542857	0.0571429	0.628571	0.588235
D1D5	13	0.571429	0.178571	0.535714	0.565217			D1D8	13	0.564103	0.025641	0.512821	0.55
D1D5	13	0.636364	0	0.545455	0.538462			D1D8	13	0.782609	0.173913	0.608696	0.590909
D1D5	13	0.555556	0.0740741	0.518519	0.555556			D1D8	13	0.541667	0.0416667	0.5	0.521739
D1D5	13	0.642857	0.0714286	0.5	0.571429			D1D8	14	0.558824	0.0882353	0.558824	0.542857
D1D5	13	0.518519	0.03125	0.518519	0.535714			D1D8	14	0.542857	0.0857143	0.542857	0.542857
D1D5	14	0.5	0.142857	0.642857	0.5			D1D8	14	0.576923	0	0.5	0.52
D1D5	14	0.555556	0.0740741	0.555556	0.551724			D1D8	14	0.52	0.0384615	0.56	0.52
D1D5	14	0.540541	0	0.621622	0.548387			D1D8	14	0.653846	0.153846	0.538462	0.6
D1D5	14	0.515152	0.162162	0.606061	0.558824			D1D8	14	0.68	0.04	0.6	0.5
D1D5	14	0.516129	0.151515	0.709677	0.575758			D1D8	14	0.516129	0.0645161	0.645161	0.6
D1D5	14	0.566667	0.0333333	0.5	0.533333			D1D8	14	0.514286	0.0285714	0.514286	0.514286
D1D5	14	0.5	0.0333333	0.5	0.5			D1D8	14	0.533333	0.04	0.533333	0.516129
D1D5	14	0.529412	0.0333333	0.529412	0.583333			D1D8	14	0.571429	0.0285714	0.542857	0.5
D1D5	14	0.516129	0.0882353	0.516129	0.529412			D1D8	14	0.548387	0.0322581	0.645161	0.612903
D1D5	14	0.59322	0.0847458	0.576271	0.527273			D1D8	14	0.571429	0.142857	0.542857	0.548387
D1D5	14	0.525	0.025	0.525	0.555556			D1D8	14	0.516129	0	0.516129	0.517241
D1D5	14	0.515152	0.075	0.606061	0.555556			D1D8	14	0.62069	0.0645161	0.551724	0.555556
D1D5	14	0.5	0.0625	0.5625	0.533333			D1D8	15	0.53125	0.03125	0.53125	0.5
D1D5	14	0.533333	0	0.533333	0.548387			D1D8	15	0.53125	0.0625	0.59375	0.548387
D1D5	15	0.512195	0.243902	0.707317	0.513514			D1D8	15	0.5	0.0384615	0.576923	0.538462
D1D5	15	0.589744	0.205128	0.666667	0.560976			D1D8	15	0.527778	0.0833333	0.638889	0.621622
D1D5	15	0.575758	0.181818	0.606061	0.548387			D1D8	15	0.533333	0.1	0.6	0.5
D1D5	15	0.6	0.0666667	0.666667	0.529412			D1D8	15	0.551724	0.137931	0.586207	0.535714
D1D5	15	0.555556	0.111111	0.555556	0.529412			D1D8	15	0.666667	0.128205	0.692308	0.564103
D1D5	15	0.6	0.1	0.6	0.526316			D1D8	15	0.611111	0.194444	0.638889	0.529412
D1D5	15	0.513514	0.162162	0.621622	0.527778			D1D8	15	0.533333	0.0888889	0.644444	0.519231
D1D5	15	0.566667	0.166667	0.666667	0.516129			D1D8	15	0.527778	0.111111	0.638889	0.527778
D1D5	15	0.5625	0.21875	0.59375	0.571429			D1D8	15	0.538462	0.128205	0.564103	0.552632
D1D5	15	0.567568	0.108108	0.594595	0.581395			D1D8	15	0.526316	0.0263158	0.552632	0.515152
D1D5	15	0.583333	0.194444	0.583333	0.575758			D1D8	15	0.527778	0.105263	0.583333	0.513514
D1D5	16	0.517241	0.0344828	0.551724	0.576923			D1D8	16	0.576923	0.192308	0.538462	0.590909
D1D5	16	0.617647	0.0588235	0.5	0.5			D1D8	16	0.652174	0.0434783	0.652174	0.518519
D1D5	16	0.527778	0.0588235	0.527778	0.633333			D1D8	16	0.514286	0	0.628571	0.536585
D1D5	16	0.512195	0.222222	0.536585	0.590909			D1D8	16	0.540541	0.054054	0.540541	0.514286
D1D5	16	0.529412	0.0243902	0.5	0.514286			D1D8	16	0.545455	0.1	0.545455	0.5
D1D5	16	0.545455	0.212121	0.636364	0.5			D1D8	16	0.535714	0.142857	0.607143	0.606061
D1D5	16	0.566667	0.0666667	0.6	0.533333			D1D8	16	0.586207	0.172414	0.551724	0.607143
D1D5	16	0.53125	0.09375	0.5	0.566667			D1D8	16	0.62963	0.148148	0.592593	0.555556
D1D5	16	0.517241	0	0.586207	0.53125			D1D8	16	0.571429	0.0357143	0.571429	0.516129
D1D5	16	0.5625	0.03125	0.5625	0.542857			D1D8	16	0.571429	0.114286	0.657143	0.542857
D1D5	16	0.5625	0.0625	0.5	0.517241			D1D8	16	0.548387	0	0.548387	0.53125
D1D5	17	0.534884	0	0.511628	0.5			D1D8	16	0.535714	0.0357143	0.5	0.541667
D1D5	17	0.512195	0.0232558	0.512195	0.511628			D1D8	17	0.55	0.025	0.55	0.525
D1D5	17	0.5625	0.0208333	0.520833	0.511628			D1D8	17	0.52381	0.0714286	0.5	0.55
D1D5	17	0.545455	0.0227273	0.568182	0.521739			D1D8	17	0.511628	0	0.511628	0.52381
D1D5	17	0.541667	0.125	0.520833	0.604651			D1D8	17	0.583333	0.0232558	0.527778	0.514286
D1D5	17	0.542857	0.0571429	0.514286	0.555556			D1D8	17	0.512195	0.0243902	0.512195	0.512195
D1D5	17	0.540541	0.054054	0.513514	0.567568			D1D8	17	0.540541	0.027027	0.513514	0.513514
D1D5	17	0.555556	0.0277778	0.555556	0.527778			D1D8	17	0.545455	0	0.527273	0.568627
D1D5	17	0.515152	0.030303	0.545455	0.515152			D1D8	17	0.510204	0.0727273	0.612245	0.511111
D1D5	17	0.5	0	0.5	0.511628			D1D8	17	0.603774	0.163265	0.660377	0.54386
D1D5	17	0.577778	0.0888889	0.533333	0.555556			D1D8	17	0.52	0.1	0.56	0.575
D1D5	17	0.52381	0.0952381	0.52381	0.526316			D1D8	17	0.55102	0.1	0.591837	0.509804
D1D5	18	0.517241	0	0.517241	0.53125			D1D8	17	0.529412	0.0882353	0.558824	0.542857
D1D5	18	0.566667	0.0333333	0.566667	0.551724			D1D8	17	0.513514	0.135135	0.540541	0.571429
D1D5	18	0.571429	0	0.535714	0.566667			D1D8	18	0.533333	0.0333333	0.533333	0.516129
D1D5	18	0.517241	0	0.517241	0.517241			D1D8	18	0.52	0.04	0.52	0.52
D1D5	18	0.542857	0.0857143	0.542857	0.555556			D1D8	18	0.518519	0.037037	0.555556	0.5
D1D5	18	0.567568	0	0.594595	0.560976			D1D8	18	0.52	0	0.52	0.5
D1D5	18	0.545455	0.0909091	0.515152	0.517241			D1D8	18	0.555556	0.0740741	0.555556	0.5
D1D5	18	0.592593	0.037037	0.518519	0.5			D1D8	18	0.521739	0	0.521739	0.521739
D1D5	18	0.555556	0	0.518519	0.518519			D1D8	18	0.538462	0	0.5	0.565217
D1D5	18	0.548387	0.0322581	0.580645	0.571429			D1D8	18	0.565217	0.115385	0.652174	0.521739
D1D5	18	0.517241	0.0645161	0.551724	0.5625			D1D8	19	0.541667	0.0645161	0.583333	0.571429
D1D5	19	0.517241	0.103448	0.62069	0.53125			D1D8	19	0.516129	0.0322581	0.548387	0.571429
D1D5	19	0.521739	0.111111	0.565217	0.5			D1D8	19	0.538462	0.0384615	0.5	0.545455
D1D5	19	0.548387	0.0322581	0.516129	0.533333			D1D8	19	0.666667	0.115385	0.619048	0.5
D1D5	19	0.5625	0	0.5	0.555556			D1D8	19	0.545455	0	0.515152	0.571429
D1D5	19	0.555556	0.0555556	0.583333	0.566667			D1D8	19	0.521739	0.151515	0.652174	0.535714
D1D5	19	0.5625	0.0625	0.5	0.517241			D1D8	19	0.5	0.05	0.6	0.55
D1D5	19	0.5625	0.03125	0.65625	0.636364			D1D8	19	0.55	0.0833333	0.6	0.571429
D1D5	19	0.592593	0.037037	0.666667	0.586207			D1D8	19	0.73913	0.0869565	0.521739	0.565217
D1D5	19	0.535714	0.0357143	0.571429	0.535714			D1D8	19	0.583333	0.0833333	0.5	0.5
D1D5	19	0.590909	0	0.590909	0.608696			D1D8	19	0.551724	0.0689655	0.62069	0.555556
D1D5	19	0.6	0.04	0.56	0.583333			D1D8	19	0.535714	0.107143	0.607143	0.518519
D1D5	20	0.538462	0	0.5	0.5			D1D8	20	0.555556	0.0277778	0.527778	0.529412
D1D5	20	0.517241	0	0.551724	0.5			D1D8	20	0.5	0.0277778	0.59375	0.548387
D1D5	20	0.576923	0.115385	0.5	0.583333			D1D8	20	0.551724	0.0689655	0.517241	0.551724
D1D5	20	0.535714	0.0357143	0.571429	0.576923			D1D8	20	0.5	0.0625	0.576923	0.551724
D1D5	20	0.56	0	0.52	0.52			D1D8	20	0.5	0.0666667	0.533333	0.518519
D1D5	20	0.5	0	0.541667	0.541667			D1D8	20	0.555556	0.0333333	0.555556	0.518519
D1D5	20	0.5	0.037037	0.5	0.5			D1D8	20	0.535714	0.0357143	0.535714	0.5
D1D5	20	0.518519	0.0740741	0.518519	0.5			D1D8	20	0.517241	0.0689655	0.551724	0.5
D1D5	20	0.5	0.0384615	0.5	0.52			D1D8	20	0.606061	0.030303	0.515152	0.545455
D1D5	20	0.518519	0	0.518519	0.52			D1D8	20	0.606061	0.030303	0.515152	0.53125
D1D5	20	0.517241	0.0689655	0.551724	0.5			D1D8	20	0.5	0.075	0.575	0.5
D1D5	20	0.586207	0.0344828	0.517241	0.566667			D1D8	20	0.540541	0.0370374	0.594595	0.571429
	Average	0.558055	0.0780644	0.566047	0.542444				Average	0.554581	0.0773575	0.576189	0.54231				Average	0.653073	0.129023	0.562084	0.591588				Average	0.608937	0.111184	0.574789	0.563377				Average	0.624564	0.123959	0.581282	0.575313
	St. Deviation	0.0520641	0.064341	0.0557093	0.0348808				St. Deviation	0.0463413	0.0570638	0.0580295	0.0344756				St. Deviation	0.127899	0.118175	0.0533466	0.0965231				St. Deviation	0.104228	0.0968725	0.0582572	0.0626109				St. Deviation	0.125087	0.117587	0.0596121	0.0795321
	Total Number Steps	218	218	218	218				Total Number Steps	218	218	218	218				Total Number Steps	82	82	82	82				Total Number Steps	88	88	88	88				Total Number Steps	85	85	85	85
	# of steps outside 2 S.D.	12	4	1	7				# of steps outside 2 S.D.	11	1	4	7				# of steps outside 2 S.D.	38	17	2	14				# of steps outside 2 S.D.	25	11	3	17				# of steps outside 2 S.D.	25	13	1	14

## Sheet: Pre-Injury Con Phase - Sylgard
Time point	Animal ID	Hindlimb Phase	Heterolateral Phase	Homolateral Phase	Forelimb Phase			Time point	Animal ID	Hindlimb Phase	Heterolateral Phase	Homolateral Phase	Forelimb Phase			Time point	Animal ID	Hindlimb Phase	Heterolateral Phase	Homolateral Phase	Forelimb Phase			Time point	Animal ID	Hindlimb Phase	Heterolateral Phase	Homolateral Phase	Forelimb Phase
BL	2	0.571429	0.0714286	0.678571	0.514286			PD1	2	0.517241	0.137931	0.655172	0.53125			PostD1	2	0.642857	0.142857	0.571429	0.571429			PD2	5	0.608696	0.173913	0.565217	0.590909
BL	2	0.515152	0.212121	0.666667	0.535714			PD1	2	0.535714	0.142857	0.642857	0.538462			PostD1	2	0.608696	0.0434783	0.521739	0.565217			PD2	5	0.68	0.12	0.56	0.576923
BL	2	0.526316	0.0526316	0.578947	0.5			PD1	2	0.636364	0.227273	0.727273	0.521739			PostD1	2	0.608696	0.0434783	0.565217	0.590909			PD2	5	0.68	0.16	0.52	0.625
BL	2	0.5	0.136364	0.590909	0.5			PD1	2	0.607143	0.142857	0.75	0.586207			PostD1	2	0.586207	0.103448	0.517241	0.6			PD2	5	0.586207	0.0689655	0.62069	0.6
BL	2	0.541667	0.125	0.541667	0.565217			PD1	2	0.555556	0.185185	0.777778	0.5			PostD1	2	0.655172	0.137931	0.586207	0.535714			PD2	5	0.538462	0.115385	0.538462	0.56
BL	2	0.608696	0.217391	0.608696	0.571429			PD1	2	0.576923	0.115385	0.653846	0.5			PostD1	2	0.5	0.0769231	0.576923	0.5			PD2	5	0.64	0.16	0.6	0.541667
BL	2	0.592593	0.037037	0.592593	0.565217			PD1	2	0.571429	0.142857	0.619048	0.52381			PostD1	2	0.617647	0.117647	0.5	0.566667			PD2	5	0.535714	0.0357143	0.5	0.535714
BL	2	0.566667	0.0333333	0.566667	0.5			PD1	2	0.615385	0.269231	0.653846	0.545455			PostD1	2	0.517241	0	0.517241	0.516129			PD2	5	0.607143	0.142857	0.5	0.6
BL	2	0.541667	0	0.541667	0.5			PD1	2	0.653846	0.192308	0.653846	0.52			PostD1	2	0.52	0	0.56	0.5			PD2	5	0.586207	0.103448	0.517241	0.571429
BL	2	0.583333	0.0833333	0.541667	0.565217			PD1	3	0.517241	0	0.517241	0.533333			PostD1	3	0.592593	0.09375	0.555556	0.529412			PD2	5	0.607143	0.0714286	0.571429	0.517241
BL	3	0.535714	0.0714286	0.571429	0.5			PD1	3	0.515152	0.0606061	0.545455	0.516129			PostD1	3	0.5625	0.03125	0.53125	0.571429			PD2	5	0.533333	0.0666667	0.533333	0.533333
BL	3	0.586207	0.0689655	0.551724	0.517241			PD1	3	0.5	0.0416667	0.583333	0.5			PostD1	3	0.592593	0.0740741	0.518519	0.538462			PD2	5	0.6	0.136364	0.5	0.53125
BL	3	0.615385	0	0.538462	0.5			PD1	3	0.535714	0.178571	0.571429	0.541667			PostD1	3	0.642857	0.178571	0.607143	0.52			PD2	6	0.5	0	0.5	0.52381
BL	3	0.62963	0.0769231	0.518519	0.571429			PD1	3	0.533333	0	0.533333	0.518519			PostD1	3	0.571429	0.107143	0.535714	0.538462			PD2	6	0.55	0.0454546	0.55	0.545455
BL	3	0.538462	0.0384615	0.538462	0.535714			PD1	3	0.6	0.1	0.542857	0.542857			PostD1	3	0.642857	0.107143	0.571429	0.535714			PD2	6	0.65	0.05	0.55	0.5
BL	3	0.52	0	0.56	0.518519			PD1	3	0.541667	0.0882353	0.541667	0.551724			PostD1	3	0.555556	0.111111	0.555556	0.521739			PD2	6	0.736842	0.263158	0.684211	0.6
BL	3	0.56	0.08	0.52	0.521739			PD1	3	0.5	0.147059	0.5	0.538462			PostD1	3	0.5	0.037037	0.5	0.518519			PD2	6	0.73913	0.217391	0.652174	0.565217
BL	3	0.583333	0.0416667	0.5	0.5			PD1	3	0.626667	0.0333333	0.533333	0.571429			PostD1	3	0.518519	0	0.518519	0.5			PD2	6	0.545455	0.0454546	0.636364	0.52
BL	3	0.576923	0.0416667	0.538462	0.541667			PD1	3	0.535714	0.142857	0.678571	0.6			PostD1	3	0.535714	0.0357143	0.535714	0.518519			PD2	6	0.692308	0.0384615	0.538462	0.566667
BL	4	0.5	0.0333333	0.5	0.548387			PD1	4	0.516129	0.193548	0.612903	0.566667			PostD1	3	0.592593	0.111111	0.518519	0.576923			PD2	6	0.655172	0.172414	0.551724	0.541667
BL	4	0.548387	0.0645161	0.516129	0.566667			PD1	4	0.527778	0.111111	0.555556	0.578947			PostD1	3	0.652174	0.0434783	0.565217	0.52			PD2	6	0.75	0.1	0.5	0.6
BL	4	0.543478	0.108696	0.673913	0.52			PD1	4	0.555556	0.0833333	0.583333	0.513514			PostD1	3	0.62963	0.111111	0.555556	0.52			PD2	6	0.727273	0.0909091	0.545455	0.545455
BL	4	0.542857	0.142857	0.628571	0.514286			PD1	4	0.564103	0.0512821	0.564103	0.5			PostD1	4	0.566667	0.166667	0.533333	0.576923			PD2	7	0.521739	0.130435	0.608696	0.56
BL	4	0.545455	0.121212	0.636364	0.5			PD1	4	0.588235	0.147059	0.529412	0.580645			PostD1	4	0.62069	0.0344828	0.586207	0.515152			PD2	7	0.608696	0.173913	0.608696	0.545455
BL	4	0.529412	0.117647	0.529412	0.548387			PD1	4	0.5625	0.09375	0.59375	0.516129			PostD1	4	0.5	0.09375	0.5	0.517241			PD2	7	0.636364	0.181818	0.545455	0.6
BL	4	0.548387	0.0967742	0.612903	0.5			PD1	4	0.548387	0.0967742	0.580645	0.516129			PostD1	4	0.5	0.0384615	0.5	0.59375			PD2	7	0.521739	0	0.521739	0.541667
BL	4	0.53125	0.0625	0.59375	0.53125			PD1	4	0.571429	0.107143	0.571429	0.5			PostD1	4	0.538462	0	0.576923	0.5			PD2	7	0.625	0.125	0.5	0.608696
BL	4	0.514286	0.0571429	0.514286	0.542857			PD1	4	0.551724	0.172414	0.62069	0.518519			PostD1	4	0.533333	0.0666667	0.5	0.535714			PD2	7	0.548387	0.0967742	0.580645	0.53125
BL	4	0.5	0.0666667	0.633333	0.5			PD1	4	0.5	0.0384615	0.576923	0.5			PostD1	4	0.548387	0.0645161	0.548387	0.516129			PD2	7	0.518519	0.037037	0.62963	0.551724
BL	4	0.5	0.117647	0.588235	0.5			PD1	4	0.5	0.0714286	0.535714	0.518519			PostD1	4	0.517241	0.103448	0.551724	0.535714			PD2	7	0.555556	0.111111	0.592593	0.52
BL	4	0.540541	0.054054	0.513514	0.575			PD1	4	0.513514	0.027027	0.513514	0.575			PostD1	4	0.52	0	0.52	0.5			PD2	7	0.583333	0.0833333	0.5	0.565217
BL	4	0.5625	0.03125	0.5625	0.515152			PD1	4	0.535714	0.0714286	0.571429	0.518519			PostD1	5	0.608696	0	0.5	0.583333			PD2	8	0.5	0.0416667	0.583333	0.5
BL	4	0.533333	0.0666667	0.5	0.551724			PD1	5	0.535714	0.0322581	0.5	0.5			PostD1	5	0.608696	0.142857	0.583333	0.608696			PD2	8	0.606061	0.242424	0.606061	0.538462
BL	5	0.548387	0	0.548387	0.585366			PD1	5	0.516129	0.193548	0.580645	0.5			PostD1	5	0.695652	0.217391	0.608696	0.625			PD2	8	0.695652	0.0434783	0.521739	0.541667
BL	5	0.53125	0.0322581	0.5625	0.552632			PD1	5	0.52	0	0.6	0.535714			PostD1	5	0.708333	0.208333	0.625	0.583333			PD2	8	0.708333	0.0833333	0.5	0.565217
BL	5	0.533333	0.266667	0.644444	0.551724			PD1	5	0.538462	0.0769231	0.576923	0.541667			PostD1	5	0.653846	0.153846	0.576923	0.56			PD2	8	0.555556	0.148148	0.62963	0.606061
BL	5	0.515152	0.212121	0.727273	0.55			PD1	5	0.633333	0.1	0.533333	0.645161			PostD1	5	0.68	0.230769	0.615385	0.583333			PD2	8	0.6	0.133333	0.6	0.533333
BL	5	0.5	0	0.529412	0.517241			PD1	5	0.538462	0.0625	0.538462	0.517241			PostD1	5	0.527778	0.03125	0.5625	0.566667			PD2	8	0.541667	0	0.541667	0.52381
BL	5	0.638889	0.147059	0.638889	0.571429			PD1	5	0.53125	0.1875	0.59375	0.541667			PostD1	5	0.535714	0.03125	0.5	0.571429			PD2	8	0.576923	0.125	0.538462	0.6
BL	5	0.548387	0.129032	0.612903	0.52			PD1	5	0.6	0.114286	0.514286	0.611111			PostD1	5	0.521739	0.037037	0.518519	0.653846			PD2	8	0.644059	0.115385	0.615385	0.5
BL	5	0.533333	0.2	0.6	0.565217			PD1	5	0.617647	0.0882353	0.529412	0.571429			PostD1	5	0.608696	0.142857	0.52381	0.6			PD2	8	0.52	0.0384615	0.518519	0.518519
BL	5	0.535714	0	0.535714	0.565217			PD1	6	0.615385	0.115385	0.538462	0.541667			PostD1	6	0.521739	0.0434783	0.521739	0.571429			PD2	13	0.7	0.45	0.55	0.571429
BL	5	0.576923	0.153846	0.576923	0.56			PD1	6	0.625	0	0.5	0.5			PostD1	6	0.681818	0	0.5	0.541667			PD2	13	0.642857	0.357143	0.642857	0.583333
BL	6	0.517241	0.103448	0.551724	0.518519			PD1	6	0.6	0	0.56	0.576923			PostD1	6	0.52381	0.025	0.52381	0.5			PD2	13	0.608696	0.478261	0.521739	0.538462
BL	6	0.52	0.12	0.64	0.565217			PD1	6	0.552632	0.030303	0.552632	0.571429			PostD1	6	0.65	0.075	0.55	0.583333			PD2	13	0.592593	0.481481	0.518519	0.5
BL	6	0.541667	0.0416667	0.583333	0.5			PD1	6	0.575758	0.0285714	0.515152	0.545455			PostD1	6	0.567568	0.0810811	0.621622	0.6			PD2	13	0.64	0.5	0.5	0.6
BL	6	0.576923	0.0384615	0.576923	0.538462			PD1	6	0.571429	0.114286	0.6	0.566667			PostD1	6	0.551724	0.103448	0.551724	0.527778			PD2	13	0.708333	0.375	0.625	0.541667
BL	6	0.5	0.0789474	0.552632	0.5			PD1	6	0.571429	0.0285714	0.542857	0.5			PostD1	6	0.5	0.0357143	0.571429	0.540541			PD2	13	0.68	0.48	0.52	0.55
BL	6	0.5	0.0357143	0.535714	0.56			PD1	6	0.588235	0.0294118	0.558824	0.529412			PostD1	6	0.5	0.0833333	0.583333	0.590909			PD2	13	0.5	0.458333	0.541667	0.545455
BL	6	0.555556	0.0740741	0.518519	0.576923			PD1	7	0.535714	0.25	0.571429	0.608696			PostD1	6	0.576923	0.153846	0.615385	0.6			PD2	13	0.64	0.115385	0.538462	0.538462
BL	6	0.5	0.0769231	0.576923	0.5			PD1	7	0.608696	0	0.565217	0.583333			PostD1	7	0.576923	0.153846	0.538462	0.583333			PD2	13	0.576923	0.0833333	0.541667	0.5
BL	7	0.52381	0	0.52381	0.52381			PD1	7	0.56	0.04	0.52	0.5			PostD1	7	0.625	0.208333	0.666667	0.521739			PD2	14	0.555556	0.037037	0.518519	0.535714
BL	7	0.55	0	0.5	0.52381			PD1	7	0.583333	0	0.5	0.5			PostD1	7	0.538462	0	0.576923	0.555556			PD2	14	0.551724	0.103448	0.586207	0.5
BL	7	0.583333	0	0.541667	0.52381			PD1	7	0.538462	0	0.615385	0.52381			PostD1	7	0.555556	0.0263158	0.555556	0.5			PD2	14	0.5	0.1875	0.59375	0.551724
BL	7	0.517241	0.241379	0.62069	0.56			PD1	7	0.545455	0.192308	0.545455	0.521739			PostD1	7	0.526316	0.1	0.526316	0.513514			PD2	14	0.609756	0.121951	0.585366	0.547619
BL	7	0.580645	0.16129	0.612903	0.575758			PD1	7	0.625	0	0.541667	0.541667			PostD1	7	0.56	0.0652174	0.54	0.625			PD2	14	0.521739	0	0.521739	0.521739
BL	7	0.5	0.1875	0.625	0.548387			PD1	7	0.5	0.0769231	0.538462	0.5			PostD1	7	0.608696	0.0930233	0.543478	0.541667			PD2	14	0.52	0	0.52	0.545455
BL	7	0.590909	0.0909091	0.5	0.590909			PD1	7	0.521739	0.0434783	0.565217	0.5			PostD1	7	0.55814	0.08	0.55814	0.52381			PD2	14	0.516129	0.0645161	0.516129	0.580645
BL	7	0.619048	0.190476	0.571429	0.578947			PD1	8	0.5625	0.09375	0.625	0.53125			PostD1	7	0.56	0.0952381	0.52	0.578947			PD2	14	0.592593	0.0740741	0.555556	0.518519
BL	7	0.521739	0.0869565	0.652174	0.541667			PD1	8	0.558824	0.117647	0.588235	0.515152			PostD1	7	0.56	0	0.52	0.52			PD2	14	0.5	0.0416667	0.5	0.521739
BL	7	0.545455	0.0454546	0.590909	0.521739			PD1	8	0.580645	0	0.612903	0.625			PostD1	8	0.52	0.04	0.52	0.5			PD2	14	0.517241	0	0.551724	0.535714
BL	7	0.565217	0	0.521739	0.541667			PD1	8	0.566667	0.0333333	0.5	0.5			PostD1	8	0.565217	0	0.521739	0.521739			PD2	14	0.5	0.107143	0.535714	0.5
BL	7	0.571429	0.125	0.52381	0.565217			PD1	8	0.571429	0.107143	0.535714	0.555556			PostD1	8	0.586207	0.0344828	0.551724	0.517241			PD2	17	0.607143	0.0714286	0.5	0.538462
BL	8	0.516129	0.16129	0.645161	0.516129			PD1	8	0.62963	0.0740741	0.518519	0.555556			PostD1	8	0.571429	0.0384615	0.535714	0.517241			PD2	17	0.576923	0.115385	0.538462	0.52381
BL	8	0.5625	0.125	0.59375	0.545455			PD1	8	0.535714	0.0357143	0.5	0.551724			PostD1	8	0.5	0	0.5	0.586207			PD2	17	0.52381	0.0769231	0.571429	0.521739
BL	8	0.5	0.0357143	0.607143	0.516129			PD1	8	0.583333	0.125	0.541667	0.545455			PostD1	8	0.538462	0.0384615	0.538462	0.64			PD2	17	0.517241	0.0689655	0.517241	0.571429
BL	8	0.516129	0.129032	0.580645	0.5			PD1	8	0.5	0	0.5	0.521739			PostD1	8	0.5	0.0625	0.541667	0.52			PD2	17	0.608696	0	0.521739	0.52
BL	8	0.529412	0.147059	0.676471	0.514286			PD1	8	0.565217	0.0434783	0.521739	0.541667			PostD1	8	0.5625	0.0625	0.5	0.52			PD2	17	0.571429	0.0357143	0.535714	0.518519
BL	8	0.545455	0.151515	0.606061	0.545455			PD1	8	0.535714	0.107143	0.535714	0.555556			PostD1	8	0.514286	0	0.542857	0.542857			PD2	17	0.517241	0.0857143	0.517241	0.533333
BL	8	0.576923		0.576923	0.571429			PD1	8	0.642857	0.142857	0.607143	0.518519			PostD1	8	0.514286	0	0.542857	0.542857			PD2	17	0.542857	0.0571429	0.542857	0.533333
BL	8	0.517241	0.0689655	0.586207	0.53125			PD1	9	0.548387	0.193548	0.516129	0.615385			PostD1	8	0.515152	0	0.545455	0.517241			PD2	17	0.580645	0.16129	0.548387	0.571429
BL	8	0.5	0.0384615	0.576923	0.518519			PD1	9	0.56	0.0384615	0.64	0.516129			PostD1	9	0.545455	0.0454546	0.545455	0.578947			PD2	18	0.52	0	0.52	0.541667
BL	8	0.555556	0.0344828	0.555556	0.533333			PD1	9	0.6	0.0384615	0.52	0.518519			PostD1	9	0.518519	0.0909091	0.518519	0.580645			PD2	18	0.6	0	0.566667	0.53125
BL	8	0.586207	0.0344828	0.551724	0.555556			PD1	9	0.538462	0.1	0.538462	0.541667			PostD1	9	0.541667	0	0.583333	0.56			PD2	18	0.565217	0.0869565	0.521739	0.545455
BL	8	0.514286	0.0285714	0.542857	0.513514			PD1	9	0.5	0.0333333	0.533333	0.5			PostD1	9	0.565217	0.0434783	0.608696	0.5			PD2	18	0.5	0	0.533333	0.56
BL	8	0.5	0.0588235	0.558824	0.515152			PD1	9	0.642857	0.0357143	0.607143	0.5			PostD1	9	0.576923	0	0.5	0.518519			PD2	18	0.56	0.166667	0.6	0.517241
BL	9	0.636364	0.0909091	0.5	0.590909			PD1	9	0.5	0.075	0.525	0.526316			PostD1	9	0.5	0.0384615	0.538462	0.52			PD2	18	0.52	0.0740741	0.56	0.529412
BL	9	0.521739	0	0.521739	0.52381			PD1	9	0.6	0.12	0.52	0.545455			PostD1	9	0.538462	0	0.538462	0.538462			PD2	18	0.518519	0.0740741	0.518519	0.521739
BL	9	0.521739	0.0869565	0.521739	0.5			PD1	9	0.521739	0.0384615	0.521739	0.5			PostD1	9	0.541667	0	0.541667	0.52			PD2	18	0.52	0.04	0.52	0.538462
BL	9	0.5	0	0.541667	0.541667			PD1	10	0.580645	0.258065	0.774194	0.515152			PostD1	9	0.6	0.12	0.6	0.52			PD2	18	0.56	0.12	0.56	0.541667
BL	9	0.56	0	0.56	0.52381			PD1	10	0.588235	0.264706	0.764706	0.515152			PostD1	9	0.636364	0.136364	0.545455	0.571429			PD2	18	0.625	0.125	0.5625	0.548387
BL	9	0.56	0	0.52	0.5			PD1	10	0.5	0.233333	0.7	0.5			PostD1	10	0.583333	0	0.583333	0.56
BL	9	0.583333	0	0.541667	0.56			PD1	10	0.538462	0.192308	0.769231	0.535714			PostD1	10	0.5	0.0769231	0.541667	0.541667
BL	9	0.583333	0.0833333	0.541667	0.590909			PD1	10	0.529412	0.147059	0.764706	0.6			PostD1	10	0.615385	0.0769231	0.538462	0.545455
BL	10	0.592593	0.111111	0.62963	0.538462			PD1	10	0.527778	0.166667	0.694444	0.542857			PostD1	10	0.52	0.217391	0.6	0.555556
BL	10	0.518519	0.148148	0.62963	0.518519			PD1	10	0.595238	0.190476	0.761905	0.6			PostD1	10	0.695652	0.0909091	0.695652	0.541667
BL	10	0.52	0.16	0.64	0.52			PD1	10	0.545455	0.151515	0.757576	0.5			PostD1	10	0.636364	0	0.636364	0.52
BL	10	0.541667	0.0416667	0.666667	0.576923			PD1	10	0.515152	0.181818	0.666667	0.5			PostD1	10	0.586207	0	0.517241	0.517241
BL	10	0.615385	0.0384615	0.615385	0.576923			PD1	10	0.513514	0.108108	0.648649	0.526316			PostD1	10	0.551724	0.0689655	0.551724	0.518519
BL	10	0.541667	0.125	0.708333	0.5			PD1	10	0.5	0.25	0.6875	0.5			PostD1	10	0.5	0.0384615	0.576923	0.5
BL	10	0.608696	0.0434783	0.652174	0.56			PD1	10	0.52	0.12	0.72	0.555556			PostD1	10	0.538462	0.153846	0.653846	0.565217
BL	10	0.592593	0.185185	0.555556	0.565217			PD1	10	0.5	0.125	0.666667	0.541667			PostD1	11	0.536585	0.027027	0.536585	0.574074
BL	10	0.576923	0.0384615	0.615385	0.5			PD1	11	0.533333	0.111111	0.577778	0.512195			PostD1	11	0.540541	0.03125	0.513514	0.552632
BL	10	0.5	0.192308	0.692308	0.52			PD1	11	0.52381	0.0952381	0.642857	0.534884			PostD1	11	0.606061	0.030303	0.515152	0.515152
BL	10	0.5	0.125	0.666667	0.5			PD1	11	0.542857	0.0571429	0.571429	0.529412			PostD1	11	0.588235	0.0882353	0.558824	0.5
BL	11	0.55814	0.162791	0.651163	0.533333			PD1	11	0.53125	0.03125	0.5625	0.515152			PostD1	11	0.534884	0.0697674	0.511628	0.513514
BL	11	0.526316	0.157895	0.631579	0.538462			PD1	11	0.5625	0.03125	0.53125	0.515152			PostD1	11	0.536585	0.0697674	0.560976	0.522727
BL	11	0.516129	0	0.677419	0.6			PD1	11	0.558824	0.0294118	0.529412	0.5			PostD1	11	0.515152	0	0.515152	0.529412
BL	11	0.5	0.131579	0.578947	0.515152			PD1	11	0.514286	0.142857	0.571429	0.516129			PostD1	11	0.53125	0.03125	0.5	0.53125
BL	11	0.588235	0.0294118	0.529412	0.527778			PD1	11	0.575758	0.030303	0.636364	0.540541			PostD1	11	0.571429	0	0.542857	0.578947
BL	11	0.514286	0.0857143	0.542857	0.515152			PD1	11	0.5	0.104167	0.520833	0.6			PostD1	11	0.548387	0.0571429	0.516129	0.516129
BL	11	0.517241	0.0344828	0.551724	0.516129			PD1	11	0.527778	0.0555556	0.611111	0.512821			PostD1	11	0.514286	0	0.514286	0.545455
BL	11	0.517241	0.103448	0.62069	0.517241			PD1	12	0.566667	0.0232558	0.566667	0.545455			PostD1	11	0.514286	0.0285714	0.514286	0.5
BL	11	0.5	0.115385	0.615385	0.551724			PD1	12	0.607143	0.116279	0.607143	0.567568			PostD1	12	0.583333	0	0.5	0.5
BL	11	0.622857	0.107143	0.535714	0.571429			PD1	12	0.548387	0.0666667	0.516129	0.5			PostD1	12	0.5625	0.125	0.5625	0.5625
BL	11	0.527778	0.111111	0.583333	0.527778			PD1	12	0.56	0.0714286	0.52	0.535714			PostD1	12	0.625	0.0416667	0.5	0.56
BL	11	0.527778	0.111111	0.638889	0.527778			PD1	12	0.535714	0.0645161	0.535714	0.52			PostD1	12	0.586207	0.0689655	0.517241	0.538462
BL	12	0.533333	0.166667	0.566667	0.555556			PD1	12	0.53125	0.129032	0.5	0.538462			PostD1	12	0.517241	0.0344828	0.517241	0.5
BL	12	0.535714	0.142857	0.607143	0.551724			PD1	12	0.5	0.04	0.571429	0.517241			PostD1	12	0.583333	0.0416667	0.541667	0.545455
BL	12	0.538462	0.153846	0.576923	0.521739			PD1	12	0.5	0	0.533333	0.5			PostD1	12	0.518519	0.0740741	0.518519	0.5
BL	12	0.625	0.125	0.625	0.52			PD1	12	0.517241	0	0.517241	0.555556			PostD1	12	0.608696	0	0.52	0.52
BL	12	0.6	0	0.52	0.538462			PD1	13	0.535714	0.0357143	0.607143	0.516129			PostD1	12	0.545455	0.125	0.52	0.52
BL	12	0.5	0.115385	0.576923	0.5			PD1	13	0.555556	0.0689655	0.555556	0.541667			PostD1	13	0.615385	0	0.576923	0.633333
BL	12	0.518519	0.148148	0.592593	0.538462			PD1	13	0.607143	0.142857	0.535714	0.5			PostD1	13	0.545455	0	0.5	0.5
BL	12	0.583333	0.0833333	0.541667	0.541667			PD1	13	0.555556	0.0714286	0.5	0.516129			PostD1	13	0.6	0	0.52	0.555556
BL	12	0.566667	0.0666667	0.633333	0.53125			PD1	13	0.580645	0.0833333	0.548387	0.518519			PostD1	13	0.619048	0.0476191	0.571429	0.521739
BL	12	0.56	0	0.52	0.5			PD1	13	0.5625	0	0.53125	0.545455			PostD1	13	0.666667	0.125	0.5	0.625
BL	12	0.646	0.0416667	0.583333	0.541667			PD1	13	0.615385	0.0625	0.5	0.53125			PostD1	13	0.5	0.0833333	0.5	0.545455
BL	12	0.6	0.12	0.6	0.52			PD1	13	0.521739	0.0769231	0.565217	0.566667			PostD1	13	0.576923	0.0769231	0.538462	0.5
BL	13	0.518519	0.0740741	0.666667	0.615385			PD1	14	0.5	0.129032	0.558824	0.53125			PostD1	13	0.64	0	0.6	0.62963
BL	13	0.555556	0.037037	0.62963	0.571429			PD1	14	0.5625	0.037037	0.53125	0.5			PostD1	13	0.533333	0	0.566667	0.59375
BL	13	0.6	0.04	0.56	0.6			PD1	14	0.592593	0	0.555556	0.516129			PostD1	13	0.521739	0	0.521739	0.5
BL	13	0.608696	0	0.521739	0.521739			PD1	14	0.545455	0.0882353	0.575758	0.514286			PostD1	14	0.555556	0.037037	0.592593	0.516129
BL	13	0.619048	0	0.571429	0.625			PD1	14	0.548387	0.0909091	0.580645	0.533333			PostD1	14	0.551724	0.0689655	0.551724	0.5
BL	13	0.608696	0.0434783	0.565217	0.608696			PD1	14	0.642857	0.0645161	0.535714	0.515152			PostD1	14	0.6	0	0.52	0.535714
BL	13	0.590909	0.0454546	0.545455	0.625			PD1	14	0.515152	0.0357143	0.515152	0.533333			PostD1	14	0.5	0.0416667	0.5	0.521739
BL	13	0.541667	0	0.5	0.52			PD1	14	0.5625	0	0.5625	0.533333			PostD1	14	0.551724	0.137931	0.551724	0.5
BL	13	0.565217	0	0.608696	0.576923			PD1	14	0.533333	0.03125	0.533333	0.5			PostD1	14	0.64	0.0344828	0.52	0.5
BL	14	0.5	0.15625	0.65625	0.5			PD1	15	0.5	0	0.583333	0.548387			PostD1	14	0.518519	0.037037	0.518519	0.586207
BL	14	0.517241	0.103448	0.586207	0.548387			PD1	15	0.513514	0.0857143	0.540541	0.53125			PostD1	14	0.586207	0.137931	0.517241	0.576923
BL	14	0.566667	0	0.533333	0.517241			PD1	15	0.545455	0	0.606061	0.5			PostD1	14	0.542857	0.114286	0.6	0.53125
BL	14	0.548387	0.0333333	0.612903	0.551724			PD1	15	0.555556	0.135135	0.666667	0.53125			PostD1	14	0.5	0.0833333	0.583333	0.513514
BL	14	0.535714	0.0357143	0.535714	0.5			PD1	15	0.526316	0.181818	0.631579	0.548387			PostD1	15	0.512195	0.170732	0.634146	0.542857
BL	14	0.548387	0.0322581	0.548387	0.571429			PD1	15	0.517241	0.0833333	0.655172	0.538462			PostD1	15	0.531915	0.0638298	0.617021	0.509804
BL	14	0.555556	0.0645161	0.592593	0.5			PD1	15	0.517241	0.184211	0.655172	0.515152			PostD1	15	0.531915	0.0425532	0.510638	0.541667
BL	14	0.5	0	0.5	0.583333			PD1	15	0.55	0.103448	0.5	0.5			PostD1	15	0.652174	0.0344828	0.608696	0.517241
BL	14	0.535714	0.0357143	0.642857	0.53125			PD1	15	0.527778	0.103448	0.555556	0.533333			PostD1	15	0.517241	0.0344828	0.551724	0.555556
BL	15	0.515152	0.151515	0.636364	0.515152			PD1	15	0.517241	0.025	0.655172	0.525			PostD1	15	0.633333	0.1	0.6	0.5
BL	15	0.575758	0.181818	0.69697	0.53125			PD1	15	0.571429	0.0277778	0.642857	0.517241			PostD1	15	0.514286	0.114286	0.542857	0.583333
BL	15	0.517241	0.103448	0.62069	0.535714			PD1	16	0.586207	0.172414	0.586207	0.518519			PostD1	15	0.6	0.0333333	0.633333	0.545455
BL	15	0.545455	0.030303	0.515152	0.517241			PD1	16	0.517241	0.107143	0.517241	0.5			PostD1	15	0.5	0.0588235	0.529412	0.516129
BL	15	0.551724	0.0909091	0.62069	0.5			PD1	16	0.529412	0.0689655	0.558824	0.5			PostD1	15	0.516129	0.0645161	0.612903	0.548387
BL	15	0.545455	0.121212	0.545455	0.548387			PD1	16	0.545455	0	0.575758	0.516129			PostD1	16	0.518519	0.037037	0.518519	0.535714
BL	15	0.516129	0.0322581	0.612903	0.529412			PD1	16	0.545455	0.117647	0.575758	0.5			PostD1	16	0.551724	0	0.689655	0.6875
BL	15	0.5	0.0769231	0.615385	0.5			PD1	16	0.5	0.030303	0.588235	0.5			PostD1	16	0.538462	0.153846	0.5	0.590909
BL	15	0.545455	0	0.606061	0.551724			PD1	16	0.538462	0.0606061	0.576923	0.53125			PostD1	16	0.619048	0	0.52381	0.619048
BL	15	0.5	0.121212	0.625	0.5			PD1	16	0.6	0.0294118	0.56	0.513514			PostD1	16	0.565217	0.0434783	0.521739	0.518519
BL	16	0.52	0.04	0.56	0.52			PD1	17	0.529412	0.0384615	0.647059	0.538462			PostD1	16	0.681818	0.0454546	0.5	0.545455
BL	16	0.538462	0.115385	0.538462	0.541667			PD1	17	0.59375	0.0555556	0.5625	0.515152			PostD1	16	0.608696	0.173913	0.521739	0.5
BL	16	0.56	0.12	0.6	0.5			PD1	17	0.548387	0.0857143	0.516129	0.571429			PostD1	16	0.526316	0.0526316	0.526316	0.5625
BL	16	0.566667	0.1	0.666667	0.566667			PD1	17	0.575758	0.0555556	0.515152	0.555556			PostD1	17	0.516129	0.0322581	0.548387	0.516129
BL	16	0.52	0.04	0.56	0.5			PD1	17	0.512821	0.030303	0.538462	0.515152			PostD1	17	0.516129	0.0322581	0.548387	0.533333
BL	16	0.518519	0.111111	0.592593	0.52			PD1	17	0.529412	0.030303	0.588235	0.53125			PostD1	17	0.514286	0	0.514286	0.53125
BL	16	0.518519	0.037037	0.555556	0.52381			PD1	17	0.541667	0.0487805	0.5	0.560976			PostD1	17	0.529412	0.0857143	0.529412	0.542857
BL	16	0.615385	0.115385	0.576923	0.592593			PD1	17	0.536585	0	0.609756	0.540541			PostD1	17	0.517241	0.0294118	0.517241	0.5
BL	17	0.525	0.125	0.6	0.525			PD1	17	0.531915	0.0208333	0.659574	0.547619			PostD1	17	0.5	0.0588235	0.529412	0.548387
BL	17	0.512195	0.146341	0.658537	0.525			PD1	17	0.520833	0.104167	0.520833	0.543478			PostD1	17	0.548387	0	0.516129	0.517241
BL	17	0.5	0.0294118	0.588235	0.513514			PD1	17	0.512195	0.0851064	0.585366	0.55102			PostD1	17	0.566667	0.0645161	0.6	0.517241
BL	17	0.529412	0.0294118	0.5	0.529412			PD1	17	0.543478	0.0416667	0.521739	0.54			PostD1	17	0.555556	0	0.555556	0.571429
BL	17	0.55	0.075	0.65	0.560976			PD1	17	0.521739	0.0243902	0.608696	0.560976			PostD1	17	0.5625	0.03125	0.53125	0.5
BL	17	0.540541	0.162162	0.567568	0.558824			PD1	18	0.567568	0.0434783	0.648649	0.555556			PostD1	17	0.514286	0.0285714	0.514286	0.5
BL	17	0.5	0.09375	0.5625	0.516129			PD1	18	0.538462	0.0652174	0.666667	0.555556			PostD1	18	0.619048	0.0476191	0.52381	0.590909
BL	17	0.580645	0.0322581	0.516129	0.545455			PD1	18	0.558824	0.135135	0.588235	0.512821			PostD1	18	0.625	0.0833333	0.541667	0.521739
BL	17	0.517241	0.0344828	0.551724	0.517241			PD1	18	0.516129	0.205128	0.548387	0.5			PostD1	18	0.521739	0	0.521739	0.571429
BL	17	0.518519	0.1	0.62963	0.53125			PD1	18	0.5	0.0294118	0.576923	0.517241			PostD1	18	0.5	0.0384615	0.538462	0.5
BL	18	0.527778	0.194444	0.75	0.540541			PD1	18	0.53125	0.0967742	0.625	0.5			PostD1	18	0.583333	0.125	0.541667	0.545455
BL	18	0.5	0.190476	0.690476	0.512195			PD1	18	0.6	0.0769231	0.533333	0.52			PostD1	18	0.636364	0.136364	0.590909	0.545455
BL	18	0.540541	0.108108	0.567568	0.527778			PD1	18	0.551724	0.09375	0.551724	0.53125			PostD1	18	0.681818	0.181818	0.590909	0.571429
BL	18	0.542857	0.0857143	0.571429	0.527778			PD1	19	0.533333	0.0689655	0.5	0.5			PostD1	18	0.517241	0.103448	0.551724	0.518519
BL	18	0.538462	0.115385	0.576923	0.5			PD1	19	0.517241	0.147059	0.517241	0.5			PostD1	18	0.592593	0.037037	0.555556	0.517241
BL	18	0.555556	0.0740741	0.518519	0.571429			PD1	19	0.538462	0	0.538462	0.517241			PostD1	18	0.5	0.0416667	0.541667	0.52381
BL	18	0.516129	0	0.580645	0.566667			PD1	19	0.535714	0.0333333	0.535714	0.5			PostD1	19	0.631579	0	0.526316	0.55
BL	18	0.535714	0.0322581	0.535714	0.518519			PD1	19	0.518519	0.0344828	0.518519	0.538462			PostD1	19	0.545455	0.0454546	0.5	0.526316
BL	18	0.538462	0.0769231	0.538462	0.538462			PD1	19	0.5	0	0.5	0.555556			PostD1	19	0.631579	0.0909091	0.526316	0.555556
BL	18	0.52	0.08	0.56	0.52			PD1	19	0.678571	0.107143	0.535714	0.535714			PostD1	19	0.608696	0.0526316	0.652174	0.583333
BL	18	0.538462	0.0384615	0.576923	0.5			PD1	19	0.541667	0	0.625	0.5			PostD1	19	0.5	0.0434783	0.5	0.555556
BL	18	0.518519	0.0740741	0.518519	0.538462			PD1	19	0.529412	0.0714286	0.735294	0.576923			PostD1	19	0.571429	0.0714286	0.52381	0.6
BL	18	0.545455	0.0606061	0.515152	0.517241			PD1	19	0.516129	0.117647	0.580645	0.5			PostD1	19	0.5	0.0952381	0.555556	0.5
BL	18	0.555556	0.0740741	0.592593	0.518519			PD1	20	0.527778	0.16129	0.527778	0.65625			PostD1	19	0.55	0.05	0.55	0.52381
BL	19	0.518519	0.0740741	0.555556	0.551724			PD1	20	0.529412	0	0.529412	0.566667			PostD1	20	0.56	0	0.52	0.518519
BL	19	0.521739	0.0434783	0.565217	0.565217			PD1	20	0.521739	0.0294118	0.543478	0.5			PostD1	20	0.5	0	0.538462	0.56
BL	19	0.571429	0.137931	0.619048	0.521739			PD1	20	0.527778	0.0588235	0.527778	0.548387			PostD1	20	0.541667	0.0384615	0.541667	0.5
BL	19	0.583333	0.0434783	0.75	0.538462			PD1	20	0.53125	0.0217391	0.6875	0.607843			PostD1	20	0.541667	0.0416667	0.541667	0.5
BL	19	0.533333	0.153846	0.566667	0.514286			PD1	20	0.552632	0.0263158	0.526316	0.513514			PostD1	20	0.583333	0.0833333	0.541667	0.521739
BL	19	0.513514	0.0384615	0.594595	0.545455			PD1	20	0.551724	0.0789474	0.551724	0.605263			PostD1	20	0.545455	0	0.5	0.521739
BL	19	0.5	0.107143	0.6	0.533333			PD1	20	0.53125	0.03125	0.53125	0.558824			PostD1	20	0.52	0.04	0.56	0.565217
BL	19	0.52	0.0357143	0.6	0.52			PD1	20	0.567568	0.125	0.513514	0.514286			PostD1	20	0.5	0	0.538462	0.52
BL	20	0.527778	0.194444	0.666667	0.540541			PD1	20	0.555556	0	0.555556	0.518519			PostD1	20	0.583333	0	0.541667	0.576923
BL	20	0.545455	0.121212	0.757576	0.583333			PD1	20	0.535714	0.027027	0.535714	0.527778			PostD1	20	0.548387	0.0645161	0.548387	0.535714
BL	20	0.53125	0	0.5	0.516129
BL	20	0.529412	0	0.558824	0.516129
BL	20	0.516129	0.0882353	0.548387	0.5
BL	20	0.5	0	0.576923	0.56
BL	20	0.535714	0.0384615	0.571429	0.5
BL	20	0.52	0	0.52	0.538462
BL	20	0.535714	0.0714286	0.535714	0.551724
BL	20	0.521739	0.0869565	0.652174	0.565217
	Average	0.543909	0.0802145	0.583256	0.536345				Average	0.549939	0.0825419	0.577499	0.533405				Average	0.563457	0.0605079	0.546845	0.543013				Average	0.586735	0.125484	0.552067	0.54664
	St. Deviation	0.0345029	0.05915	0.0542219	0.0284848				St. Deviation	0.0371115	0.0642411	0.065697	0.0309706				St. Deviation	0.0505038	0.0538664	0.0389764	0.03622				St. Deviation	0.0671366	0.122928	0.04281	0.029879
	Total Number Steps	197	196	197	197				Total Number Steps	189	189	189	189				Total Number Steps	189	189	189	189				Total Number Steps	81	81	81	81
	# of steps outside 2 S.D.	0	6	9	4				# of steps outside 2 S.D.	2	7	16	8				# of steps outside 2 S.D.	12	1	2	10				# of steps outside 2 S.D.	13	10	1	3

## Sheet: Pre-Injury Dox Phase - Sylgard
Time point	Animal ID	Hindlimb Phase	Heterolateral Phase	Homolateral Phase	Forelimb Phase			Time point	Animal ID	Hindlimb Phase	Heterolateral Phase	Homolateral Phase	Forelimb Phase			Time point	Animal ID	Hindlimb Phase	Heterolateral Phase	Homolateral Phase	Forelimb Phase			Time point	Animal ID	Hindlimb Phase	Heterolateral Phase	Homolateral Phase	Forelimb Phase			Time point	Animal ID	Hindlimb Phase	Heterolateral Phase	Homolateral Phase	Forelimb Phase
D1D5	2	0.521739	0.0434783	0.608696	0.541667			D1D8	2	0.909091	0.363636	0.590909	0.736842			D2D5	5	0.681818	0.227273	0.590909	0.6			D2D8	5	0.592593	0.111111	0.518519	0.6			D2D13	5	0.5625	0.1875	0.59375	0.518519
D1D5	2	0.727273	0.318182	0.590909	0.684211			D1D8	2	0.782609	0.391304	0.913043	0.545455			D2D5	5	0.62963	0.111111	0.518519	0.607143			D2D8	5	0.73913	0.217391	0.521739	0.666667			D2D13	5	0.645161	0.193548	0.645161	0.548387
D1D5	2	0.863636	0.318182	0.636364	0.631579			D1D8	2	0.5	0.125	0.59375	0.5			D2D5	5	0.653846	0.115385	0.538462	0.576923			D2D8	5	0.62963	0	0.518519	0.636364			D2D13	5	0.521739	0	0.652174	0.576923
D1D5	2	0.681818	0.0909091	0.590909	0.56			D1D8	2	0.56	0.08	0.56	0.5			D2D5	5	0.607143	0.178571	0.571429	0.541667			D2D8	5	0.772727	0.185185	0.636364	0.590909			D2D13	5	0.548387	0.0322581	0.580645	0.6
D1D5	2	0.592593	0.111111	0.555556	0.518519			D1D8	2	0.894737	0.421053	0.631579	0.764706			D2D5	5	0.8	0.24	0.64	0.583333			D2D8	5	0.56	0.04	0.52	0.56			D2D13	5	0.625	0.0833333	0.583333	0.52
D1D5	2	0.551724	0.172414	0.62069	0.5			D1D8	2	1	0.214286	0.5	0.777778			D2D5	5	0.68	0.2	0.64	0.521739			D2D8	5	0.6	0.08	0.6	0.541667			D2D13	5	0.625	0.166667	0.5	0.636364
D1D5	2	0.576923	0.153846	0.692308	0.518519			D1D8	2	0.888889	0.388889	0.5	0.875			D2D5	5	0.947368	0.473684	0.631579	0.9			D2D8	5	0.548387	0.0967742	0.516129	0.625			D2D13	5	0.84	0.44	0.88	0.578947
D1D5	2	0.95	0.210526	0.555556	0.5			D1D8	2	0.666667	0.25	0.625	0.571429			D2D5	5	0.791667	0.208333	0.541667	0.652174			D2D8	5	0.678571	0.214286	0.607143	0.56			D2D13	5	0.88	0.294118	0.823529	0.521739
D1D5	3	0.52	0	0.52	0.521739			D1D8	3	0.571429	0.0476191	0.571429	0.52381			D2D5	5	0.818182	0.227273	0.636364	0.590909			D2D8	5	0.782609	0.26087	0.652174	0.590909			D2D13	5	0.612903	0.129032	0.548387	0.566667
D1D5	3	0.73913	0.26087	0.521739	0.736842			D1D8	3	0.842105	0.368421	0.631579	0.631579			D2D5	6	0.518519	0.0344828	0.555556	0.551724			D2D8	5	0.56	0.08	0.52	0.583333			D2D13	5	0.714286	0.142857	0.535714	0.678571
D1D5	3	0.535714	0.142857	0.535714	0.56			D1D8	3	0.666667	0.142857	0.571429	0.571429			D2D5	6	0.535714	0.0344828	0.5	0.518519			D2D8	5	0.625	0.125	0.625	0.521739			D2D13	5	0.580645	0	0.516129	0.551724
D1D5	3	0.72	0.12	0.52	0.615385			D1D8	3	0.761905	0.190476	0.619048	0.55			D2D5	6	0.52381	0.0434783	0.52381	0.521739			D2D8	6	0.619048	0	0.52381	0.545455			D2D13	5	0.592593	0.0645161	0.555556	0.5
D1D5	3	0.625	0.125	0.541667	0.545455			D1D8	3	0.636364	0.136364	0.590909	0.52381			D2D5	6	0.565217	0	0.565217	0.565217			D2D8	6	0.684211	0.0526316	0.526316	0.55			D2D13	6	0.666667	0	0.555556	0.578947
D1D5	3	0.72	0.16	0.56	0.6			D1D8	3	0.545455	0.0454546	0.545455	0.5			D2D5	6	0.777778	0.166667	0.555556	0.611111			D2D8	6	0.777778	0.166667	0.555556	0.588235			D2D13	6	0.578947	0.111111	0.578947	0.590909
D1D5	3	0.619048	0.142857	0.52381	0.631579			D1D8	3	0.518519	0	0.518519	0.5			D2D5	6	0.7	0.05	0.55	0.636364			D2D8	6	0.789474	0.105263	0.526316	0.588235			D2D13	6	0.833333	0	0.555556	0.578947
D1D5	3	0.538462	0.08	0.538462	0.518519			D1D8	3	0.52	0.037037	0.52	0.56			D2D5	6	0.714286	0.142857	0.571429	0.608696			D2D8	6	0.782609	0.304348	0.608696	0.666667			D2D13	6	0.52	0.12	0.6	0.545455
D1D5	3	0.684211	0.157895	0.526316	0.631579			D1D8	4	0.5	0.0416667	0.5	0.541667			D2D5	6	0.653846	0.0384615	0.538462	0.592593			D2D8	6	0.761905	0.142857	0.619048	0.6			D2D13	6	0.518519	0.0740741	0.592593	0.5
D1D5	3	0.652174	0.0526316	0.521739	0.521739			D1D8	4	0.6	0.16	0.56	0.583333			D2D5	7	0.75	0.15	0.55	0.619048			D2D8	6	0.5	0	0.5	0.5			D2D13	6	0.652174	0	0.565217	0.583333
D1D5	4	0.583333	0.0416667	0.541667	0.555556			D1D8	4	0.571429	0.0476191	0.571429	0.541667			D2D5	7	0.636364	0.136364	0.545455	0.65			D2D8	6	0.65	0	0.55	0.55			D2D13	6	0.518519	0.037037	0.62963	0.571429
D1D5	4	0.535714	0.0714286	0.535714	0.518519			D1D8	4	0.590909	0.0909091	0.590909	0.521739			D2D5	7	0.736842	0	0.578947	0.533333			D2D8	6	0.62069	0	0.517241	0.5			D2D13	6	0.516129	0.129032	0.516129	0.571429
D1D5	4	0.517241	0.0689655	0.517241	0.565217			D1D8	4	0.727273	0.181818	0.590909	0.590909			D2D5	7	0.75	0.210526	0.65	0.55			D2D8	6	0.608696	0.0344828	0.565217	0.521739			D2D13	6	0.666667	0	0.5	0.526316
D1D5	4	0.56	0.137931	0.52	0.571429			D1D8	4	0.6	0.12	0.6	0.52			D2D5	7	0.619048	0.142857	0.52381	0.6			D2D8	7	0.636364	0.136364	0.545455	0.571429			D2D13	7	0.947368	0.210526	0.631579	0.75
D1D5	4	0.52	0	0.64	0.615385			D1D8	4	0.625	0.125	0.583333	0.541667			D2D5	7	0.8	0.25	0.55	0.7			D2D8	7	0.5	0.0416667	0.5	0.521739			D2D13	7	0.882353	0.294118	0.529412	0.777778
D1D5	4	0.538462	0.115385	0.538462	0.521739			D1D8	4	0.583333	0.0416667	0.541667	0.5			D2D5	7	0.857143	0.285714	0.571429	0.7			D2D8	7	0.52	0	0.56	0.521739			D2D13	7	0.947368	0.315789	0.526316	0.842105
D1D5	4	0.52381	0.0476191	0.571429	0.52381			D1D8	4	0.541667	0.0416667	0.541667	0.5			D2D5	7	0.52	0.08	0.52	0.6			D2D8	7	0.75	0.2	0.6	0.6			D2D13	7	0.9	0.3	0.55	0.764706
D1D5	4	0.615385	0.115385	0.692308	0.6			D1D8	5	0.535714	0.142857	0.535714	0.56			D2D5	7	0.652174	0.217391	0.521739	0.65			D2D8	7	0.6	0.12	0.56	0.576923			D2D13	7	0.789474	0.157895	0.631579	0.529412
D1D5	4	0.571429	0.114286	0.542857	0.558824			D1D8	5	0.583333	0.0416667	0.541667	0.521739			D2D5	7	0.695652	0.130435	0.521739	0.666667			D2D8	7	0.714286	0.214286	0.535714	0.708333			D2D13	7	0.73913	0.26087	0.521739	0.75
D1D5	5	0.538462	0.192308	0.576923	0.565217			D1D8	5	0.56	0.12	0.56	0.515152			D2D5	7	0.628571	0.114286	0.571429	0.633333			D2D8	7	0.818182	0.227273	0.590909	0.652174			D2D13	7	0.857143	0.333333	0.571429	0.789474
D1D5	5	0.73913	0.130435	0.565217	0.6			D1D8	5	0.515152	0.0606061	0.575758	0.574468			D2D5	7	0.85	0.25	0.6	0.65			D2D8	7	0.842105	0.263158	0.578947	0.666667			D2D13	7	0.947368	0.368421	0.578947	0.882353
D1D5	5	0.64	0.16	0.6	0.541667			D1D8	5	0.512195	0.0555556	0.560976	0.53125			D2D5	8	0.944444	0.333333	0.611111	0.722222			D2D8	8	0.558824	0	0.529412	0.529412			D2D13	7	0.55	0	0.55	0.526316
D1D5	5	0.75	0.15	0.55	0.619048			D1D8	5	0.527778	0.0555556	0.527778	0.538462			D2D5	8	0.9375	0.3125	0.5	0.8			D2D8	8	0.53125	0	0.53125	0.535714			D2D13	8	0.875	0.3125	0.5625	0.733333
D1D5	5	0.727273	0.272727	0.636364	0.578947			D1D8	5	0.551724	0.137931	0.551724	0.517241			D2D5	8	0.566667	0.133333	0.5	0.607143			D2D8	8	0.592593	0.148148	0.592593	0.538462			D2D13	8	0.85	0.35	0.55	0.777778
D1D5	5	0.652174	0.217391	0.608696	0.571429			D1D8	5	0.566667	0.2	0.6	0.52			D2D5	8	0.708333	0.25	0.541667	0.681818			D2D8	8	0.666667	0.212121	0.666667	0.5			D2D13	8	0.947368	0.368421	0.526316	0.882353
D1D5	5	0.727273	0.181818	0.5	0.631579			D1D8	5	0.625	0.1875	0.6875	0.5			D2D5	8	0.941176	0.294118	0.647059	0.9375			D2D8	8	0.941176	0.352941	0.647059	0.705882			D2D13	8	1	0.4375	0.625	0.8125
D1D5	5	0.518519	0	0.555556	0.545455			D1D8	6	0.809524	0.190476	0.571429	0.6			D2D5	8	0.941176	0.352941	0.588235	0.777778			D2D8	8	0.888889	0.333333	0.611111	0.722222			D2D13	8	0.761905	0.238095	0.571429	0.666667
D1D5	6	0.571429	0	0.52381	0.521739			D1D8	6	0.8	0.1	0.55	0.666667			D2D5	8	1	0.411765	0.529412	0.888889			D2D8	8	0.652174	0.0869565	0.608696	0.5			D2D13	8	0.809524	0.238095	0.619048	0.619048
D1D5	6	0.619048	0	0.571429	0.608696			D1D8	6	0.52	0.12	0.64	0.541667			D2D5	8	0.888889	0.333333	0.555556	0.888889			D2D8	8	0.947368	0.388889	0.611111	0.777778			D2D13	8	0.888889	0.166667	0.5	0.684211
D1D5	6	0.526316	0.0526316	0.5	0.564103			D1D8	6	0.535714	0	0.607143	0.633333			D2D5	13	0.736842	0.105263	0.578947	0.571429			D2D8	8	0.9375	0.3125	0.5	0.823529			D2D13	8	0.740741	0.148148	0.555556	0.75
D1D5	6	0.517241	0.0689655	0.517241	0.551724			D1D8	6	0.59375	0.0625	0.5	0.5			D2D5	13	0.772727	0.181818	0.545455	0.5			D2D8	8	1	0.388889	0.611111	0.733333			D2D13	8	1	0.444444	0.611111	0.823529
D1D5	6	0.681818	0.0909091	0.5	0.571429			D1D8	6	0.533333	0.0909091	0.6	0.6			D2D5	13	0.565217	0	0.608696	0.583333			D2D8	13	0.551724	0	0.517241	0.517241			D2D13	13	1	0.235294	0.529412	0.722222
D1D5	6	0.538462	0.0384615	0.538462	0.541667			D1D8	6	0.606061	0.0909091	0.515152	0.518519			D2D5	13	0.761905	0.238095	0.52381	0.666667			D2D8	13	0.636364	0	0.545455	0.5			D2D13	13	0.7	0.1	0.55	0.590909
D1D5	6	0.62963	0.222222	0.592593	0.545455			D1D8	6	0.555556	0	0.592593	0.56			D2D5	13	0.56	0.12	0.6	0.5			D2D8	13	1	0.411765	0.588235	0.8			D2D13	13	0.652174	0.0434783	0.608696	0.541667
D1D5	6	0.617647	0.0384615	0.705882	0.619048			D1D8	6	0.566667	0.0740741	0.6	0.588235			D2D5	13	0.666667	0.111111	0.555556	0.666667			D2D8	13	0.882353	0	1	0.66667			D2D13	13	0.736842	0.0526316	0.526316	0.590909
D1D5	6	0.619048	0.0476191	0.52381	0.571429			D1D8	7	0.52381	0	0.52381	0.55			D2D5	13	0.772727	0	0.590909	0.684211			D2D8	13	0.571429	0.0714286	0.607143	0.555556			D2D13	13	0.761905	0.190476	0.52381	0.611111
D1D5	6	0.5	0.0434783	0.545455	0.5			D1D8	7	0.565217	0.130435	0.608696	0.5			D2D5	13	0.842105	0.136364	0.578947	0.578947			D2D8	13	0.52381	0.0476191	0.571429	0.55			D2D13	13	0.727273	0.0454546	0.590909	0.586207
D1D5	7	0.9	0.35	0.6	0.705882			D1D8	7	0.619048	0.0952381	0.571429	0.545455			D2D5	13	0.85	0.2	0.55	0.588235			D2D8	13	0.95	0.45	0.6	0.652174			D2D13	13	0.772727	0.363636	0.590909	0.736842
D1D5	7	0.545455	0	0.590909	0.565217			D1D8	7	0.666667	0.238095	0.571429	0.611111			D2D5	13	0.888889	0.333333	0.681111	0.705882			D2D8	13	0.933333	0.333333	0.666667	0.733333			D2D13	13	0.55	0.1	0.55	0.5
D1D5	7	0.541667	0.125	0.541667	0.52381			D1D8	7	0.56	0.08	0.56	0.538462			D2D5	14	0.608696	0.0434783	0.521739	0.521739			D2D8	13	1	0.210526	0.526316	0.75			D2D13	13	0.888889	0.388889	0.611111	0.777778
D1D5	7	0.6	0	0.52	0.5			D1D8	7	0.52	0.08	0.6	0.52			D2D5	14	0.62963	0.185185	0.518519	0.608696			D2D8	13	0.863636	0.391304	0.521739	0.521739			D2D13	13	0.9	0.35	0.6	0.777778
D1D5	7	0.541667	0.04	0.541667	0.5			D1D8	7	0.666667	0.0952381	0.571429	0.545455			D2D5	14	0.857143	0.238095	0.571429	0.631579			D2D8	13	0.875	0.333333	0.666667	0.833333			D2D13	14	0.52	0	0.52	0.5
D1D5	7	0.5	0.0909091	0.590909	0.52381			D1D8	7	0.64	0.16	0.6	0.521739			D2D5	14	0.809524	0.238095	0.619048	0.619048			D2D8	13	0.904762	0.25	0.625	0.6875			D2D13	14	0.56	0.04	0.52	0.541667
D1D5	7	0.75	0	0.6	0.529412			D1D8	8	0.590909	0.0454546	0.545455	0.571429			D2D5	14	0.541667	0	0.5	0.571429			D2D8	14	0.823529	0.176471	0.529412	0.6875			D2D13	14	0.55	0.1	0.55	0.526316
D1D5	7	0.608696	0.15	0.565217	0.565217			D1D8	8	0.571429	0.178571	0.607143	0.555556			D2D5	14	0.7	0.125	0.6	0.578947			D2D8	14	0.615385	0.0769231	0.615385	0.666667			D2D13	14	0.658696	0	0.521739	0.578947
D1D5	8	0.545455	0	0.545455	0.541667			D1D8	8	0.666667	0.0555556	0.5	0.578947			D2D5	14	0.85	0.4	0.65	0.7			D2D8	14	0.842105	0.263158	0.578947	0.647059			D2D13	14	1	0.173913	0.611111	0.625
D1D5	8	0.5	0.0416667	0.583333	0.565217			D1D8	8	0.625	0.0833333	0.5	0.565217			D2D5	14	0.857143	0.333333	0.571429	0.722222			D2D8	14	0.607143	0.0714286	0.571429	0.5			D2D13	14	0.944444	0.444444	0.5	0.666667
D1D5	8	0.608696	0.130435	0.565217	0.545455			D1D8	8	0.636364	0.181818	0.545455	0.6			D2D5	14	0.888889	0.277778	0.555556	0.8125			D2D8	14	0.62963	0.037037	0.518519	0.535714			D2D13	14	1	0.285714	0.571429	0.647059
D1D5	8	0.6	0.12	0.56	0.590909			D1D8	8	0.666667	0.208333	0.625	0.565217			D2D5	14	0.6	0	0.52	0.518519			D2D8	14	1	0.375	0.625	0.75			D2D13	14	0.761905	0.32	0.5	0.55
D1D5	8	0.666667	0.208333	0.583333	0.521739			D1D8	8	0.8	0.133333	0.533333	0.684211			D2D5	14	0.64	0.12	0.52	0.590909			D2D8	14	0.518519	0.037037	0.518519	0.521739			D2D13	14	0.8	0.2	0.64	0.619048
D1D5	8	0.5	0	0.541667	0.541667			D1D8	8	0.85	0.3	0.5	0.75			D2D5	17	0.52	0	0.52	0.5			D2D8	14	0.608696	0.111111	0.565217	0.541667			D2D13	14	0.75	0	0.6	0.555556
D1D5	8	0.708333	0.208333	0.666667	0.541667			D1D8	9	0.608696	0.173913	0.521739	0.6			D2D5	17	0.545455	0	0.5	0.521739			D2D8	14	0.571429	0.0476191	0.52381	0.52381			D2D13	17	0.551724	0	0.551724	0.535714
D1D5	8	0.642857	0.178571	0.642857	0.535714			D1D8	9	0.517241	0.206897	0.62069	0.538462			D2D5	17	0.6	0.114286	0.571429	0.533333			D2D8	14	0.764706	0.0588235	0.529412	0.6			D2D13	17	0.517241	0.0344828	0.517241	0.517241
D1D5	9	0.590909	0.0454546	0.545455	0.521739			D1D8	9	0.538462	0.153846	0.653846	0.535714			D2D5	17	0.545455	0.0285714	0.5	0.5			D2D8	14	0.944444	0.388889	0.5	0.875			D2D13	17	0.571429	0.0714286	0.535714	0.5
D1D5	9	0.576923	0	0.538462	0.545455			D1D8	9	0.52381	0	0.571429	0.526316			D2D5	17	0.7	0.05	0.55	0.545455			D2D8	17	0.5	0	0.541667	0.521739			D2D13	17	0.548387	0	0.548387	0.538462
D1D5	9	0.619048	0.153846	0.571429	0.541667			D1D8	9	0.538462	0.0952381	0.692308	0.62963			D2D5	17	0.5	0	0.53125	0.566667			D2D8	17	0.526316	0	0.526316	0.555556			D2D13	17	0.590909	0.181818	0.636364	0.5
D1D5	9	0.52381	0	0.52381	0.52381			D1D8	9	0.583333	0.125	0.5	0.631579			D2D5	17	0.533333	0.0625	0.6	0.575758			D2D8	17	0.540541	0.0526316	0.540541	0.513514			D2D13	17	0.615385	0.153846	0.615385	0.538462
D1D5	9	0.565217	0	0.521739	0.55			D1D8	9	0.681818	0.272727	0.590909	0.571429			D2D5	17	0.5	0.0357143	0.535714	0.538462			D2D8	17	0.517241	0.0689655	0.517241	0.52			D2D13	17	0.571429	0.0357143	0.571429	0.517241
D1D5	9	0.542857	0.0285714	0.6	0.625			D1D8	9	0.6	0	0.56	0.633333			D2D5	17	0.535714	0.0357143	0.535714	0.517241			D2D8	17	0.538462	0.0769231	0.538462	0.52			D2D13	17	0.545455	0.242424	0.606061	0.538462
D1D5	9	0.52	0.0571429	0.52	0.518519			D1D8	9	0.791667	0.208333	0.583333	0.807692			D2D5	17	0.551724	0.0689655	0.551724	0.5			D2D8	17	0.565217	0.0434783	0.521739	0.545455			D2D13	17	0.823529	0.294118	0.647059	0.666667
D1D5	9	0.52	0.08	0.52	0.526316			D1D8	9	0.782609	0.304348	0.565217	0.714286			D2D5	18	0.5	0	0.55	0.529412			D2D8	17	0.608696	0.0434783	0.521739	0.541667			D2D13	17	0.708333	0.25	0.583333	0.555556
D1D5	9	0.52	0	0.52	0.521739			D1D8	10	0.636364	0	0.590909	0.571429			D2D5	18	0.52381	0	0.52381	0.5			D2D8	17	0.545455	0	0.5	0.52381			D2D13	17	0.583333	0.0416667	0.541667	0.521739
D1D5	10	0.590909	0.272727	0.772727	0.538462			D1D8	10	0.727273	0.0454546	0.545455	0.571429			D2D5	18	0.521739	0.0434783	0.521739	0.5			D2D8	18	0.789474	0.210526	0.631579	0.6			D2D13	17	0.52	0	0.56	0.52381
D1D5	10	0.5	0.0909091	0.727273	0.521739			D1D8	10	0.52381	0.0454546	0.619048	0.52381			D2D5	18	0.714286	0.0952381	0.52381	0.636364			D2D8	18	0.55	0	0.55	0.55			D2D13	18	0.75	0.2	0.55	0.631579
D1D5	10	0.695652	0.0434783	0.565217	0.590909			D1D8	10	0.55	0.0952381	0.55	0.52381			D2D5	18	0.714286	0.190476	0.571429	0.578947			D2D8	18	0.714286	0.190476	0.619048	0.55			D2D13	18	0.75	0.25	0.6	0.611111
D1D5	10	0.64	0	0.56	0.576923			D1D8	10	0.842105	0.105263	0.526316	0.65			D2D5	18	0.571429	0	0.52381	0.5			D2D8	18	0.6	0	0.6	0.6			D2D13	18	0.52381	0.0952381	0.571429	0.5
D1D5	10	0.535714	0.0357143	0.714286	0.612903			D1D8	10	0.782609	0.130435	0.521739	0.636364			D2D5	18	0.571429	0.0476191	0.571429	0.5			D2D8	18	0.7	0.2	0.6	0.6			D2D13	18	0.55	0	0.55	0.526316
D1D5	10	0.657143	0	0.542857	0.526316			D1D8	10	0.85	0.35	0.5	0.833333			D2D5	18	0.761905	0.142857	0.52381	0.636364			D2D8	18	0.52381	0	0.571429	0.526316			D2D13	18	0.533333	0	0.533333	0.548387
D1D5	10	0.6	0.2	0.56	0.590909			D1D8	10	0.894737	0.473684	0.684211	0.764706											D2D8	18	0.565217	0.130435	0.565217	0.52381			D2D13	18	0.53125	0.03125	0.53125	0.517241
D1D5	10	0.52	0.12	0.6	0.555556			D1D8	11	0.567568	0.054054	0.648649	0.578947											D2D8	18	0.684211	0	0.619048	0.52381			D2D13	18	0.518519	0	0.555556	0.517241
D1D5	10	0.5	0.115385	0.576923	0.571429			D1D8	11	0.577778	0.133333	0.644444	0.560976											D2D8	18	0.545455	0.2	0.5	0.5			D2D13	18	0.944444	0.277778	0.722222	0.6
D1D5	10	0.535714	0.107143	0.571429	0.580645			D1D8	11	0.515152	0.0606061	0.545455	0.515152											D2D8	18	0.7	0	0.619048	0.571429			D2D13	18	0.703704	0.185185	0.518519	0.625
D1D5	10	0.518519	0.0740741	0.555556	0.535714			D1D8	11	0.617647	0.0294118	0.558824	0.5																			D2D13	18	0.75	0.157895	0.611111	0.611111
D1D5	11	0.516129	0	0.516129	0.5			D1D8	11	0.542857	0.0857143	0.542857	0.515152																			D2D13	18	0.6875	0.166667	0.578947	0.578947
D1D5	11	0.517241	0.0322581	0.517241	0.517241			D1D8	11	0.571429	0.0857143	0.571429	0.527778																			D2D13	18	0.5	0.05	0.526316	0.526316
D1D5	11	0.567568	0.108108	0.567568	0.527778			D1D8	11	0.59375	0.0625	0.59375	0.515152
D1D5	11	0.594595	0.054054	0.567568	0.512821			D1D8	11	0.52	0	0.52	0.521739
D1D5	11	0.5	0.0882353	0.529412	0.53125			D1D8	11	0.5	0.117647	0.617647	0.514286
D1D5	11	0.580645	0.0967742	0.612903	0.516129			D1D8	11	0.517241	0.0689655	0.586207	0.516129
D1D5	11	0.545455	0.030303	0.575758	0.518519			D1D8	12	0.681818	0.136364	0.545455	0.52381
D1D5	11	0.517241	0.0344828	0.62069	0.53125			D1D8	12	0.55	0.1	0.65	0.526316
D1D5	11	0.5625	0.125	0.625	0.515152			D1D8	12	0.6875	0.142857	0.5	0.611111
D1D5	11	0.542857	0.142857	0.628571	0.5			D1D8	12	0.833333	0.277778	0.666667	0.611111
D1D5	12	0.52381	0.0476191	0.571429	0.52381			D1D8	12	0.518519	0.0740741	0.592593	0.5
D1D5	12	0.5	0.0833333	0.541667	0.521739			D1D8	12	0.575758	0.151515	0.545455	0.566667
D1D5	12	0.583333	0.125	0.583333	0.521739			D1D8	12	0.666667	0.0476191	0.571429	0.521739
D1D5	12	0.565217	0.0434783	0.521739	0.521739			D1D8	12	0.75	0.15	0.55	1
D1D5	12	0.652174	0.0869565	0.521739	0.55			D1D8	12	0.684211	0.157895	0.578947	0.555556
D1D5	12	0.583333	0.0434783	0.541667	0.52			D1D8	13	0.833333	0.0555556	0.5	0.652174
D1D5	12	0.521739	0.0416667	0.565217	0.578947			D1D8	13	0.857143	0.285714	0.571429	0.684211
D1D5	12	0.538462	0.217391	0.653846	0.548387			D1D8	13	0.941176	0.294118	0.529412	0.8125
D1D5	13	0.684211	0.0526316	0.526316	0.6			D1D8	13	0.55	0	0.55	0.52381
D1D5	13	0.541667	0.0740741	0.5	0.518519			D1D8	13	0.772727	0.0909091	0.545455	0.666667
D1D5	13	0.555556	0.0454546	0.518519	0.538462			D1D8	13	0.666667	0.148148	0.518519	0.583333
D1D5	13	0.636364	0.263158	0.5	0.583333			D1D8	13	0.727273	0.136364	0.545455	0.590909
D1D5	13	0.789474	0.24	0.684211	0.6			D1D8	13	0.73913	0.0869565	0.565217	0.52381
D1D5	13	0.72	0.181818	0.56	0.619048			D1D8	13	0.5	0	0.5	0.5
D1D5	13	0.681818	0.227273	0.636364	0.545455			D1D8	14	0.545455	0.0416667	0.545455	0.541667
D1D5	13	0.727273	0.1	0.590909	0.619048			D1D8	14	0.736842	0.105263	0.578947	0.571429
D1D5	14	0.518519	0	0.518519	0.538462			D1D8	14	0.625	0.25	0.541667	0.65
D1D5	14	0.666667	0.0476191	0.571429	0.521739			D1D8	14	1	0.235294	0.529412	0.705882
D1D5	14	0.521739	0	0.521739	0.541667			D1D8	14	0.567568	0.0810811	0.540541	0.564103
D1D5	14	0.541667	0.0416667	0.625	0.538462			D1D8	14	0.516129	0.0967742	0.612903	0.516129
D1D5	14	0.857143	0.190476	0.666667	0.52381			D1D8	14	0.681818	0.0909091	0.5	0.590909
D1D5	14	0.809524	0.0476191	0.619048	0.5			D1D8	14	0.727273	0.136364	0.545455	0.571429
D1D5	14	0.608696	0.130435	0.565217	0.52381			D1D8	15	0.547619	0.0952381	0.666667	0.545455
D1D5	14	0.538462	0	0.5	0.52			D1D8	15	0.541667	0.104167	0.625	0.531915
D1D5	14	0.52	0	0.52	0.518519			D1D8	15	0.580645	0.193548	0.612903	0.518519
D1D5	14	0.535714	0.0714286	0.535714	0.5			D1D8	15	0.6	0.08	0.6	0.518519
D1D5	15	0.571429	0.107143	0.571429	0.518519			D1D8	15	0.535714	0.178571	0.678571	0.56
D1D5	15	0.53125	0.09375	0.5625	0.516129			D1D8	15	0.5	0.1	0.733333	0.612903
D1D5	15	0.5	0	0.625	0.576923			D1D8	15	0.615385	0.153846	0.666667	0.555556
D1D5	15	0.586207	0.206897	0.551724	0.565217			D1D8	15	0.782609	0.26087	0.869565	0.5625
D1D5	15	0.586207	0.103448	0.551724	0.551724			D1D8	15	0.703704	0.222222	0.666667	0.555556
D1D5	15	0.6	0.133333	0.566667	0.551724			D1D8	15	0.542857	0.142857	0.571429	0.516129
D1D5	15	0.529412	0.176471	0.647059	0.5			D1D8	15	0.538462	0.0769231	0.615385	0.517241
D1D5	15	0.512195	0.121951	0.658537	0.52381			D1D8	16	0.52	0.08	0.56	0.5
D1D5	15	0.5	0.1875	0.6875	0.515152			D1D8	16	0.521739	0	0.521739	0.52381
D1D5	15	0.558824	0.264706	0.647059	0.580645			D1D8	16	0.777778	0.0555556	0.555556	0.72
D1D5	15	0.612903	0.193548	0.645161	0.588235			D1D8	16	0.818182	0.363636	0.545455	0.764706
D1D5	16	0.583333	0	0.583333	0.5			D1D8	16	0.571429	0.142857	0.52381	0.578947
D1D5	16	0.8	0.2	0.65	0.5			D1D8	16	0.608696	0.130435	0.652174	0.521739
D1D5	16	0.521739	0	0.521739	0.541667			D1D8	16	0.7	0.2	0.6	0.555556
D1D5	16	0.52	0.08	0.52	0.521739			D1D8	16	0.541667	0.166667	0.541667	0.571429
D1D5	16	0.6	0.16	0.56	0.565217			D1D8	17	0.548387	0	0.516129	0.516129
D1D5	16	0.625	0.166667	0.625	0.541667			D1D8	17	0.516129	0	0.548387	0.533333
D1D5	16	0.541667	0.0833333	0.541667	0.521739			D1D8	17	0.5	0.0588235	0.558824	0.514286
D1D5	16	0.5	0.0384615	0.5	0.521739			D1D8	17	0.515152	0.121212	0.666667	0.580645
D1D5	16	0.8	0.3	0.6	0.684211			D1D8	17	0.5	0	0.558824	0.605263
D1D5	16	0.809524	0.285714	0.666667	0.619048			D1D8	17	0.5	0.0666667	0.566667	0.535714
D1D5	17	0.526316	0.0789474	0.552632	0.513514			D1D8	17	0.592593	0.037037	0.518519	0.518519
D1D5	17	0.589744	0.179487	0.538462	0.6			D1D8	17	0.538462	0.0384615	0.5	0.52
D1D5	17	0.513514	0	0.540541	0.5			D1D8	17	0.580645	0	0.548387	0.548387
D1D5	17	0.558824	0	0.529412	0.538462			D1D8	17	0.526316	0	0.5	0.513514
D1D5	17	0.538462	0.025641	0.512821	0.5			D1D8	17	0.53125	0.0263158	0.5625	0.558824
D1D5	17	0.575758	0.027027	0.545455	0.542857			D1D8	18	0.521739	0	0.521739	0.52381
D1D5	17	0.540541	0.0810811	0.540541	0.515152			D1D8	18	0.636364	0.227273	0.636364	0.526316
D1D5	17	0.548387	0.0967742	0.548387	0.5			D1D8	18	0.652174	0.0869565	0.608696	0.631579
D1D5	17	0.542857	0	0.514286	0.513514			D1D8	18	0.5	0.0869565	0.607143	0.535714
D1D5	17	0.522727	0.0810811	0.545455	0.545455			D1D8	18	0.5	0.0833333	0.541667	0.576923
D1D5	18	0.541667	0	0.541667	0.5			D1D8	18	0.521739	0	0.521739	0.5
D1D5	18	0.5	0.0833333	0.5	0.565217			D1D8	18	0.666667	0.238095	0.619048	0.578947
D1D5	18	0.518519	0.0740741	0.518519	0.521739			D1D8	18	0.576923	0.115385	0.538462	0.592593
D1D5	18	0.541667	0	0.541667	0.52381			D1D8	18	0.64	0.16	0.64	0.5
D1D5	18	0.565217	0.125	0.565217	0.541667			D1D8	18	0.6	0.04	0.52	0.5
D1D5	18	0.541667	0.0869565	0.583333	0.56			D1D8	19	0.526316	0.0416667	0.578947	0.545455
D1D5	18	0.548387	0.225806	0.548387	0.615385			D1D8	19	0.541667	0.0833333	0.541667	0.52381
D1D5	18	0.615385	0.0384615	0.576923	0.5625			D1D8	19	0.52381	0.142857	0.571429	0.55
D1D5	18	0.555556	0.148148	0.518519	0.545455			D1D8	19	0.5	0.125	0.625	0.545455
D1D5	18	0.551724	0.0344828	0.517241	0.518519			D1D8	19	0.565217	0.0434783	0.565217	0.52
D1D5	19	0.708333	0.0416667	0.583333	0.608696			D1D8	19	0.75	0.25	0.65	0.578947
D1D5	19	0.62963	0	0.518519	0.5			D1D8	19	0.526316	0.0526316	0.526316	0.55
D1D5	19	0.526316	0.0789474	0.605263	0.512195			D1D8	19	0.583333	0.0833333	0.541667	0.5
D1D5	19	0.6	0.075	0.625	0.55			D1D8	19	0.545455	0.1	0.545455	0.521739
D1D5	19	0.888889	0.111111	0.555556	0.666667			D1D8	20	0.583333	0	0.5	0.52
D1D5	19	0.565217	0.0869565	0.608696	0.521739			D1D8	20	0.551724	0.0344828	0.517241	0.580645
D1D5	19	0.736842	0.157895	0.526316	0.666667			D1D8	20	0.565217	0	0.521739	0.521739
D1D5	19	0.681818	0.0909091	0.590909	0.666667			D1D8	20	0.535714	0	0.535714	0.576923
D1D5	19	0.565217	0.037037	0.521739	0.5			D1D8	20	0.517241	0.0714286	0.586207	0.5625
D1D5	19	0.583333	0.037037	0.541667	0.538462			D1D8	20	0.52	0	0.52	0.521739
D1D5	20	0.548387	0	0.548387	0.515152			D1D8	20	0.55	0.08	0.55	0.52381
D1D5	20	0.529412	0.0882353	0.529412	0.516129			D1D8	20	0.5	0.115385	0.538462	0.521739
D1D5	20	0.516129	0.0322581	0.516129	0.548387			D1D8	20	0.52	0	0.52	0.52
D1D5	20	0.5	0	0.538462	0.518519
D1D5	20	0.5	0	0.5	0.516129
D1D5	20	0.516129	0.0322581	0.548387	0.555556
D1D5	20	0.535714	0.0357143	0.535714	0.5
D1D5	20	0.529412	0.0294118	0.5	0.529412
D1D5	20	0.516129	0.0322581	0.548387	0.516129
	Average	0.592093	0.0944583	0.566909	0.550685				Average	0.618833	0.117329	0.573283	0.571238				Average	0.695173	0.147149	0.559386	0.613647				Average	0.69141	0.137539	0.57128	0.595951				Average	0.708161	0.160281	0.57468	0.610825
	St. Deviation	0.0907783	0.0805361	0.0517378	0.0446434				St. Deviation	0.115076	0.0956965	0.0595941	0.0795051				St. Deviation	0.136982	0.117568	0.0423051	0.100654				St. Deviation	0.149676	0.129367	0.0676415	0.0900275				St. Deviation	0.156091	0.133286	0.061879	0.101905
	Total Number Steps	177	177	177	177				Total Number Steps	171	171	171	171				Total Number Steps	76	76	76	76				Total Number Steps	80	80	80	80				Total Number Steps	83	83	83	83
	# of steps outside 2 S.D.	37	12	8	23				# of steps outside 2 S.D.	51	22	7	33				# of steps outside 2 S.D.	44	21	1	34				# of steps outside 2 S.D.	38	18	1	24				# of steps outside 2 S.D.	48	27	3	32
