# Supplementary material for: Silencing long-descending inter-enlargement propriospinal neurons improves hindlimb stepping after contusive spinal cord injuries
Source: eLife. 2023 Dec 15;12:e82944. doi: 10.7554/eLife.82944 (PMC10776087; doi:10.7554/eLife.82944)
Supplement: Figure 3—source data 1. [file elife-82944-fig3-data1.xlsx]

## Sheet: Pre-Inj Acrylic
Time point	Animal ID	Swing Time	Stance Time	Stride Time	Stride Distance	Speed			Time point	Animal ID	Swing Time	Stance Time	Stride Time	Stride Distance	Speed
BL	2	0.13	0.15	0.28	18.7509	66.9675			D1D5	2	0.11	0.17	0.28	20.603	73.581
BL	2	0.11	0.21	0.32	14.3213	44.7541			D1D5	2	0.12	0.12	0.24	25.1524	104.801
BL	2	0.13	0.13	0.26	18.7726	72.2022			D1D5	2	0.16	0.13	0.29	23.6375	81.5086
BL	2	0.14	0.12	0.26	19.7955	76.1365			D1D5	2	0.12	0.21	0.33	13.0817	39.6415
BL	2	0.15	0.15	0.3	19.6095	65.365			D1D5	2	0.14	0.2	0.34	14.5374	42.757
BL	2	0.14	0.13	0.27	19.015	70.4259			D1D5	2	0.16	0.12	0.28	21.2523	75.9012
BL	2	0.12	0.16	0.28	17.7862	63.5222			D1D5	2	0.13	0.12	0.25	24.2686	97.0742
BL	2	0.14	0.11	0.25	22.9396	91.7584			D1D5	2	0.13	0.13	0.26	22.0101	84.6542
BL	2	0.16	0.14	0.3	20.2677	67.559			D1D5	2	0.12	0.1	0.22	25.4144	115.52
BL	2	0.15	0.13	0.28	17.2627	61.6525			D1D5	3	0.15	0.23	0.38	15.8961	41.8319
BL	3	0.12	0.21	0.33	14.2686	43.2382			D1D5	3	0.11	0.17	0.28	19.9344	71.1945
BL	3	0.14	0.19	0.33	17.8393	54.0584			D1D5	3	0.14	0.16	0.3	19.5579	65.1931
BL	3	0.17	0.17	0.34	17.2997	50.8816			D1D5	3	0.14	0.14	0.28	23.3438	83.3707
BL	3	0.15	0.15	0.3	18.3968	61.3225			D1D5	3	0.11	0.12	0.23	22.3994	97.3888
BL	3	0.13	0.15	0.28	20.3339	72.621			D1D5	3	0.14	0.17	0.31	18.9938	61.2703
BL	3	0.07	0.29	0.36	11.5786	32.1629			D1D5	3	0.13	0.14	0.27	20.8314	77.1535
BL	3	0.15	0.14	0.29	22.361	77.1068			D1D5	3	0.1	0.11	0.21	20.5831	98.0146
BL	3	0.15	0.13	0.28	21.71	77.5356			D1D5	3	0.13	0.11	0.24	22.1315	92.2148
BL	3	0.12	0.15	0.27	18.2722	67.6748			D1D5	3	0.14	0.1	0.24	21.4117	89.2156
BL	3	0.16	0.27	0.43	14.5862	33.9214			D1D5	3	0.12	0.13	0.25	19.1013	76.4051
BL	3	0.15	0.21	0.36	17.121	47.5583			D1D5	3	0.11	0.11	0.22	20.9675	95.3069
BL	4	0.12	0.22	0.34	13.0579	38.4056			D1D5	3	0.12	0.14	0.26	20.9207	80.4643
BL	4	0.13	0.18	0.31	13.9313	44.9397			D1D5	4	0.14	0.17	0.31	19.8139	63.9159
BL	4	0.13	0.23	0.36	14.8505	41.2514			D1D5	4	0.15	0.14	0.29	23.2348	80.1199
BL	4	0.14	0.28	0.42	11.3327	26.9826			D1D5	4	0.14	0.15	0.29	21.9512	75.6939
BL	4	0.14	0.26	0.4	15.4176	38.5441			D1D5	4	0.16	0.12	0.28	23.4508	83.753
BL	4	0.14	0.16	0.3	16.2944	54.3146			D1D5	4	0.15	0.16	0.31	23.1722	74.7491
BL	4	0.14	0.18	0.32	18.019	56.3093			D1D5	4	0.17	0.15	0.32	18.6522	58.288
BL	4	0.15	0.24	0.39	12.9377	33.1736			D1D5	4	0.14	0.24	0.38	15.9147	41.8807
BL	4	0.15	0.21	0.36	16.2097	45.0269			D1D5	4	0.14	0.21	0.35	16.5505	47.2873
BL	4	0.15	0.19	0.34	18.314	53.8646			D1D5	4	0.16	0.19	0.35	19.2679	55.0512
BL	4	0.18	0.16	0.34	18.1315	53.328			D1D5	4	0.15	0.15	0.3	18.3323	61.1077
BL	4	0.2	0.2	0.4	17.5711	43.9278			D1D5	4	0.16	0.19	0.35	22.0127	62.8935
BL	5	0.16	0.31	0.47	15.9327	51.3957			D1D5	4	0.14	0.15	0.29	18.6548	64.3271
BL	5	0.18	0.34	0.52	17.8771	52.5796			D1D5	5	0.13	0.21	0.34	17.2772	50.8153
BL	5	0.29	0.46	0.75	13.4158	29.1648			D1D5	5	0.15	0.19	0.34	18.1849	53.4849
BL	5	0.22	0.36	0.58	17.2842	48.0117			D1D5	5	0.12	0.22	0.34	14.8124	43.5658
BL	5	0.18	0.32	0.5	16.1659	50.5183			D1D5	5	0.15	0.22	0.37	17.5377	47.3992
BL	5	0.14	0.29	0.43	14.7291	50.7899			D1D5	5	0.16	0.17	0.33	19.374	58.7092
BL	5	0.21	0.35	0.56	15.3892	43.9693			D1D5	5	0.19	0.21	0.4	14.9158	37.2896
BL	5	0.16	0.33	0.49	21.3072	64.5673			D1D5	5	0.14	0.35	0.49	14.2407	29.0627
BL	5	0.19	0.34	0.53	16.0034	47.0689			D1D5	5	0.18	0.26	0.44	20.3657	46.2856
BL	5	0.15	0.33	0.48	18.9689	57.4815			D1D5	5	0.19	0.16	0.35	26.3825	75.3785
BL	5	0.19	0.3	0.49	13.4155	44.7182			D1D5	5	0.11	0.17	0.28	14.7425	52.6517
BL	5	0.15	0.3	0.45	16.2818	54.2727			D1D5	5	0.15	0.2	0.35	18.9876	54.2503
BL	5	0.14	0.29	0.43	18.9708	65.4164			D1D5	5	0.18	0.2	0.38	21.4002	56.3163
BL	5	0.13	0.27	0.4	19.9067	73.7286			D1D5	6	0.14	0.27	0.41	15.1206	36.8794
BL	6	0.15	0.14	0.29	19.9601	68.8279			D1D5	6	0.12	0.21	0.33	17.8789	54.1786
BL	6	0.15	0.14	0.29	20.8872	72.0248			D1D5	6	0.14	0.17	0.31	19.5438	63.0447
BL	6	0.13	0.25	0.38	11.8825	31.2697			D1D5	6	0.11	0.13	0.24	20.7	86.2499
BL	6	0.14	0.27	0.41	17.1218	41.7604			D1D5	6	0.16	0.13	0.29	22.8743	78.8769
BL	6	0.12	0.22	0.34	16.4979	48.5233			D1D5	6	0.13	0.36	0.49	14.8019	30.2079
BL	6	0.12	0.12	0.24	20.2278	84.2827			D1D5	6	0.13	0.26	0.39	16.2309	41.6178
BL	6	0.14	0.11	0.25	22.6074	90.4297			D1D5	6	0.14	0.26	0.4	15.5815	38.9538
BL	6	0.12	0.17	0.29	18.6604	64.3462			D1D5	6	0.14	0.12	0.26	23.2527	89.4334
BL	6	0.13	0.15	0.28	19.8389	70.8532			D1D5	6	0.15	0.13	0.28	20.3073	72.5262
BL	6	0.15	0.13	0.28	22.3516	79.8272			D1D5	6	0.14	0.14	0.28	22.7421	81.2218
BL	6	0.13	0.14	0.27	18.2783	67.6973			D1D5	6	0.17	0.16	0.33	18.1297	54.9385
BL	6	0.14	0.19	0.33	18.3376	55.5685			D1D5	6	0.13	0.16	0.29	19.6049	67.603
BL	6	0.15	0.14	0.29	19.693	67.9067			D1D5	6	0.14	0.17	0.31	22.1038	71.3027
BL	7	0.12	0.15	0.27	16.8132	62.271			D1D5	7	0.13	0.12	0.25	22.109	88.4358
BL	7	0.16	0.14	0.3	17.7303	59.1009			D1D5	7	0.13	0.09	0.22	25.5007	115.912
BL	7	0.12	0.1	0.22	23.2207	105.549			D1D5	7	0.14	0.1	0.24	27.5187	114.661
BL	7	0.11	0.25	0.36	14.4958	40.266			D1D5	7	0.11	0.09	0.2	26.1167	130.584
BL	7	0.12	0.14	0.26	17.1964	66.1399			D1D5	7	0.12	0.09	0.21	25.9154	123.407
BL	7	0.13	0.18	0.31	16.0625	51.8146			D1D5	7	0.13	0.14	0.27	21.1752	78.4267
BL	7	0.13	0.14	0.27	19.0729	70.6405			D1D5	7	0.12	0.13	0.25	21.3041	85.2165
BL	7	0.13	0.17	0.3	19.9397	66.4657			D1D5	7	0.13	0.11	0.24	24.344	101.433
BL	7	0.11	0.12	0.23	16.4129	71.3604			D1D5	7	0.12	0.11	0.23	23.7669	103.334
BL	7	0.14	0.13	0.27	19.9416	73.8578			D1D5	7	0.12	0.12	0.24	21.3653	89.022
BL	7	0.19	0.2	0.39	12.7561	32.708			D1D5	7	0.11	0.1	0.21	25.0994	119.521
BL	7	0.12	0.13	0.25	20.3928	81.5711			D1D5	8	0.15	0.14	0.29	21.4691	74.0314
BL	7	0.13	0.11	0.24	19.6348	81.8117			D1D5	8	0.14	0.17	0.31	17.6872	57.0554
BL	8	0.13	0.16	0.29	18.5813	64.0736			D1D5	8	0.13	0.12	0.25	21.9164	87.6658
BL	8	0.13	0.17	0.3	18.391	61.3035			D1D5	8	0.14	0.15	0.29	20.5704	70.9326
BL	8	0.13	0.14	0.27	17.9661	66.541			D1D5	8	0.16	0.14	0.3	21.2276	70.7587
BL	8	0.15	0.15	0.3	19.0002	63.3341			D1D5	8	0.13	0.15	0.28	18.8406	67.2877
BL	8	0.12	0.17	0.29	19.2452	66.3627			D1D5	8	0.14	0.14	0.28	21.5865	77.0947
BL	8	0.12	0.13	0.25	19.9735	79.8941			D1D5	8	0.14	0.15	0.29	20.1875	69.612
BL	8	0.17	0.14	0.31	17.3251	55.8873			D1D5	8	0.17	0.13	0.3	19.677	65.59
BL	8	0.12	0.11	0.23	20.4835	89.0585			D1D5	8	0.14	0.12	0.26	21.9499	84.4225
BL	8	0.12	0.12	0.24	20.2939	84.5578			D1D5	8	0.13	0.12	0.25	21.2815	85.1262
BL	8	0.13	0.16	0.29	17.9479	61.8893			D1D5	9	0.13	0.09	0.22	27.2397	123.817
BL	8	0.16	0.15	0.31	20.9857	67.6959			D1D5	9	0.11	0.09	0.2	25.2649	126.325
BL	8	0.16	0.14	0.3	18.6467	62.1556			D1D5	9	0.13	0.27	0.4	14.0066	35.0164
BL	8	0.14	0.13	0.27	19.0857	70.6876			D1D5	9	0.16	0.21	0.37	16.4609	44.489
BL	9	0.13	0.19	0.32	16.1883	50.5883			D1D5	9	0.12	0.11	0.23	23.3012	101.31
BL	9	0.15	0.21	0.36	15.9887	44.4132			D1D5	9	0.12	0.12	0.24	20.3946	84.9777
BL	9	0.12	0.18	0.3	16.5001	55.0002			D1D5	9	0.12	0.12	0.24	24.1402	100.584
BL	9	0.14	0.16	0.3	20.4123	68.0411			D1D5	9	0.13	0.11	0.24	24.9773	104.072
BL	9	0.14	0.18	0.32	17.1988	53.7462			D1D5	9	0.11	0.09	0.2	25.9464	123.554
BL	9	0.13	0.2	0.33	20.8077	63.0538			D1D5	9	0.13	0.09	0.22	25.629	116.495
BL	9	0.1	0.11	0.21	18.4744	87.9732			D1D5	10	0.13	0.19	0.32	15.5613	48.6289
BL	9	0.13	0.21	0.34	19.3389	56.8792			D1D5	10	0.12	0.16	0.28	17.0686	60.9593
BL	9	0.1	0.18	0.28	15.6747	55.981			D1D5	10	0.14	0.14	0.28	16.8117	60.0418
BL	9	0.16	0.16	0.32	14.3468	44.8337			D1D5	10	0.13	0.12	0.25	20.8155	83.2621
BL	9	0.13	0.25	0.38	17.9637	47.2728			D1D5	10	0.14	0.15	0.29	19.4506	67.0709
BL	9	0.08	0.17	0.25	14.1069	56.4277			D1D5	10	0.15	0.18	0.33	19.0628	57.766
BL	9	0.12	0.12	0.24	20.5364	85.5683			D1D5	10	0.11	0.15	0.26	17.2578	66.3761
BL	9	0.13	0.12	0.25	22.2454	88.9817			D1D5	10	0.15	0.2	0.35	18.7635	53.6101
BL	9	0.11	0.12	0.23	16.2419	70.6168			D1D5	10	0.14	0.15	0.29	19.3119	66.5927
BL	10	0.13	0.17	0.3	18.2017	60.6724			D1D5	10	0.13	0.13	0.26	19.5034	75.0132
BL	10	0.14	0.14	0.28	19.6079	70.0282			D1D5	10	0.15	0.17	0.32	18.6877	58.3991
BL	10	0.14	0.38	0.52	16.7256	32.1646			D1D5	10	0.15	0.17	0.32	19.9994	62.4982
BL	10	0.16	0.19	0.35	18.2432	52.1233			D1D5	10	0.15	0.18	0.33	18.358	55.6304
BL	10	0.14	0.17	0.31	17.97	57.9676			D1D5	11	0.14	0.23	0.37	17.4152	47.068
BL	10	0.16	0.24	0.4	14.5139	36.2849			D1D5	11	0.17	0.21	0.38	19.5434	51.4299
BL	10	0.16	0.23	0.39	16.5191	42.3566			D1D5	11	0.19	0.22	0.41	19.2918	47.0531
BL	10	0.15	0.24	0.39	16.8985	43.3295			D1D5	11	0.17	0.17	0.34	20.555	60.4558
BL	10	0.15	0.25	0.4	15.5699	38.9247			D1D5	11	0.17	0.17	0.34	20.3652	59.8976
BL	10	0.12	0.26	0.38	15.0344	39.5641			D1D5	11	0.18	0.15	0.33	20.3661	61.7154
BL	10	0.11	0.19	0.3	16.4467	54.8224			D1D5	11	0.14	0.16	0.3	18.9158	63.0526
BL	10	0.14	0.18	0.32	18.8975	59.0546			D1D5	11	0.17	0.14	0.31	21.5743	69.5946
BL	10	0.15	0.18	0.33	18.321	55.5183			D1D5	11	0.13	0.21	0.34	15.4316	45.3871
BL	10	0.15	0.18	0.33	18.253	55.3121			D1D5	11	0.15	0.14	0.29	21.4497	73.9645
BL	10	0.14	0.17	0.31	17.5662	56.6651			D1D5	11	0.18	0.26	0.44	17.3299	39.386
BL	11	0.15	0.23	0.38	15.9084	41.8643			D1D5	11	0.17	0.21	0.38	17.7762	46.7795
BL	11	0.16	0.21	0.37	17.3837	46.9831			D1D5	12	0.14	0.19	0.33	20.5485	62.2681
BL	11	0.14	0.24	0.38	15.1835	39.9565			D1D5	12	0.14	0.16	0.3	25.2834	84.2781
BL	11	0.16	0.21	0.37	18.1693	49.1062			D1D5	12	0.15	0.12	0.27	27.1147	100.425
BL	11	0.14	0.16	0.3	18.9126	63.0419			D1D5	12	0.14	0.09	0.23	23.8912	103.875
BL	11	0.17	0.22	0.39	19.0903	48.9495			D1D5	12	0.16	0.11	0.27	24.0148	88.9437
BL	11	0.17	0.2	0.37	16.8775	45.6147			D1D5	12	0.14	0.17	0.31	15.1421	48.8453
BL	11	0.16	0.18	0.34	18.776	55.2235			D1D5	12	0.14	0.21	0.35	22.1584	63.3097
BL	11	0.16	0.17	0.33	18.8997	57.2718			D1D5	12	0.14	0.12	0.26	23.8911	91.8887
BL	11	0.16	0.2	0.36	16.8799	46.8887			D1D5	12	0.13	0.1	0.23	24.839	107.995
BL	11	0.15	0.24	0.39	16.6272	42.6338			D1D5	13	0.12	0.11	0.23	25.5117	110.921
BL	11	0.16	0.21	0.37	19.163	51.792			D1D5	13	0.12	0.12	0.24	19.5961	81.6505
BL	11	0.16	0.2	0.36	19.0271	52.853			D1D5	13	0.14	0.18	0.32	21.0898	65.9056
BL	11	0.14	0.15	0.29	19.3472	66.7146			D1D5	13	0.15	0.22	0.37	22.1153	59.7711
BL	12	0.14	0.21	0.35	17.1359	48.9598			D1D5	13	0.14	0.16	0.3	21.4088	71.3628
BL	12	0.13	0.2	0.33	15.7363	47.6856			D1D5	13	0.14	0.14	0.28	24.88	88.8572
BL	12	0.15	0.12	0.27	21.6854	80.3165			D1D5	13	0.12	0.1	0.22	24.0409	109.277
BL	12	0.16	0.13	0.29	19.2982	66.5454			D1D5	13	0.14	0.13	0.27	22.5657	83.5767
BL	12	0.13	0.28	0.41	13.9033	33.9104			D1D5	13	0.13	0.15	0.28	21.801	77.8606
BL	12	0.17	0.19	0.36	23.0835	64.1209			D1D5	13	0.13	0.14	0.27	23.7176	87.843
BL	12	0.13	0.15	0.28	16.9999	60.7138			D1D5	14	0.15	0.13	0.28	21.0754	75.2693
BL	12	0.16	0.16	0.32	20.9888	65.5899			D1D5	14	0.14	0.13	0.27	22.3352	82.7229
BL	12	0.16	0.15	0.31	20.8792	67.3524			D1D5	14	0.17	0.2	0.37	17.5592	47.4572
BL	12	0.16	0.14	0.3	20.6729	68.9097			D1D5	14	0.13	0.2	0.33	19.6634	59.586
BL	12	0.14	0.13	0.27	21.3016	78.8949			D1D5	14	0.14	0.17	0.31	15.5832	50.2684
BL	12	0.15	0.16	0.31	21.9731	70.881			D1D5	14	0.13	0.17	0.3	19.6727	65.5758
BL	12	0.14	0.13	0.27	22.2845	82.5352			D1D5	14	0.14	0.16	0.3	23.0308	76.7694
BL	13	0.13	0.17	0.3	18.09	60.3			D1D5	14	0.13	0.21	0.34	19.0451	56.0149
BL	13	0.15	0.17	0.32	20.2307	63.2209			D1D5	14	0.13	0.18	0.31	18.479	59.6098
BL	13	0.14	0.17	0.31	19.4188	62.6411			D1D5	14	0.15	0.44	0.59	14.4371	24.4697
BL	13	0.14	0.15	0.29	20.4975	70.681			D1D5	14	0.16	0.24	0.4	19.8736	49.6839
BL	13	0.14	0.12	0.26	22.0685	84.8787			D1D5	14	0.15	0.18	0.33	17.9731	54.4641
BL	13	0.13	0.11	0.24	21.7428	90.5948			D1D5	14	0.14	0.18	0.32	21.8951	68.4222
BL	13	0.15	0.16	0.31	19.5326	63.0085			D1D5	14	0.14	0.16	0.3	19.8709	66.2362
BL	13	0.14	0.15	0.29	19.0224	65.5946			D1D5	15	0.17	0.24	0.41	16.5327	40.3235
BL	13	0.15	0.15	0.3	19.9781	66.5938			D1D5	15	0.16	0.23	0.39	16.7108	42.8483
BL	13	0.16	0.18	0.34	19.2381	56.5828			D1D5	15	0.17	0.16	0.33	18.0851	54.8033
BL	13	0.15	0.18	0.33	19.2241	58.2549			D1D5	15	0.14	0.16	0.3	18.468	61.56
BL	13	0.18	0.18	0.36	18.8329	52.3136			D1D5	15	0.17	0.19	0.36	19.357	53.7696
BL	14	0.14	0.22	0.36	16.6849	46.3469			D1D5	15	0.2	0.2	0.4	18.7409	46.8523
BL	14	0.13	0.21	0.34	15.3572	45.1682			D1D5	15	0.13	0.24	0.37	18.5846	50.2287
BL	14	0.16	0.27	0.43	17.2432	40.1006			D1D5	15	0.12	0.18	0.3	16.5611	55.2035
BL	14	0.13	0.25	0.38	14.5975	38.4146			D1D5	15	0.17	0.15	0.32	19.5966	61.2395
BL	14	0.19	0.22	0.41	16.5085	40.2646			D1D5	15	0.13	0.24	0.37	16.3082	44.0763
BL	14	0.17	0.2	0.37	16.6141	44.9029			D1D5	15	0.17	0.19	0.36	19.1761	53.2668
BL	14	0.19	0.27	0.46	13.1853	28.6636			D1D5	16	0.15	0.14	0.29	25.2769	87.1617
BL	14	0.19	0.21	0.4	17.2922	43.2305			D1D5	16	0.13	0.21	0.34	20.2711	59.6209
BL	14	0.12	0.27	0.39	13.5994	34.8704			D1D5	16	0.17	0.19	0.36	21.0173	58.3815
BL	14	0.16	0.25	0.41	14.2268	34.6996			D1D5	16	0.14	0.27	0.41	16.3972	39.9932
BL	14	0.19	0.25	0.44	16.4836	37.4628			D1D5	16	0.16	0.18	0.34	19.6837	57.8933
BL	14	0.14	0.26	0.4	14.4674	36.1685			D1D5	16	0.16	0.17	0.33	17.8495	54.0895
BL	14	0.15	0.31	0.46	14.9811	32.5675			D1D5	16	0.14	0.16	0.3	17.7948	59.3159
BL	14	0.15	0.28	0.43	13.1546	30.592			D1D5	16	0.17	0.15	0.32	20.3807	63.6897
BL	15	0.15	0.33	0.48	16.1597	33.6659			D1D5	16	0.14	0.15	0.29	19.6922	67.9043
BL	15	0.14	0.22	0.36	16.3452	45.4033			D1D5	16	0.14	0.18	0.32	17.341	54.1905
BL	15	0.14	0.22	0.36	15.8336	43.9823			D1D5	16	0.15	0.17	0.32	20.1884	63.0888
BL	15	0.15	0.17	0.32	19.1489	59.8403			D1D5	17	0.18	0.25	0.43	18.7918	43.7018
BL	15	0.16	0.19	0.35	18.0278	51.508			D1D5	17	0.17	0.24	0.41	19.1018	46.5898
BL	15	0.16	0.16	0.32	17.2738	53.9806			D1D5	17	0.23	0.25	0.48	19.8098	41.2705
BL	15	0.12	0.21	0.33	15.8037	47.8899			D1D5	17	0.19	0.25	0.44	18.7771	42.6753
BL	15	0.11	0.2	0.31	16.3334	52.6884			D1D5	17	0.18	0.3	0.48	19.7576	41.1617
BL	15	0.17	0.19	0.36	17.8296	49.5266			D1D5	17	0.17	0.18	0.35	19.2457	54.9876
BL	15	0.16	0.22	0.38	15.1085	39.7592			D1D5	17	0.15	0.22	0.37	20.9552	56.6358
BL	15	0.19	0.22	0.41	16.6862	40.698			D1D5	17	0.17	0.19	0.36	19.1033	53.0647
BL	15	0.16	0.17	0.33	17.0244	51.5891			D1D5	17	0.16	0.17	0.33	20.1301	61.0003
BL	15	0.16	0.2	0.36	16.8389	46.7746			D1D5	17	0.17	0.25	0.42	19.1615	45.6226
BL	15	0.18	0.16	0.34	15.7248	46.2493			D1D5	17	0.16	0.29	0.45	18.648	41.4401
BL	16	0.15	0.15	0.3	19.2075	64.0249			D1D5	17	0.21	0.21	0.42	22.0533	52.5078
BL	16	0.14	0.17	0.31	17.115	55.2098			D1D5	18	0.13	0.16	0.29	21.1152	72.8109
BL	16	0.15	0.14	0.29	19.7215	68.005			D1D5	18	0.14	0.16	0.3	22.6313	75.4377
BL	16	0.13	0.22	0.35	14.9432	42.6948			D1D5	18	0.14	0.14	0.28	22.9458	81.9493
BL	16	0.12	0.29	0.41	10.7047	26.1089			D1D5	18	0.14	0.15	0.29	24.7642	85.3937
BL	16	0.14	0.22	0.36	14.6532	40.7033			D1D5	18	0.14	0.21	0.35	18.7694	53.6268
BL	16	0.14	0.22	0.36	15.7216	43.6711			D1D5	18	0.17	0.2	0.37	17.1894	46.4579
BL	16	0.15	0.18	0.33	16.1106	48.8201			D1D5	18	0.15	0.18	0.33	23.0673	69.901
BL	16	0.13	0.15	0.28	17.8224	63.6513			D1D5	18	0.13	0.14	0.27	23.0687	85.4397
BL	16	0.11	0.12	0.23	18.6461	81.07			D1D5	18	0.13	0.14	0.27	22.561	83.5594
BL	16	0.17	0.17	0.34	18.5685	54.6132			D1D5	18	0.15	0.16	0.31	21.7417	70.1347
BL	16	0.17	0.27	0.44	13.6626	31.0514			D1D5	18	0.12	0.17	0.29	23.4471	80.8521
BL	16	0.14	0.14	0.28	17.4313	62.2545			D1D5	19	0.13	0.16	0.29	19.6159	67.6412
BL	16	0.13	0.15	0.28	15.1656	54.1628			D1D5	19	0.13	0.1	0.23	23.0846	100.368
BL	17	0.14	0.26	0.4	16.8511	42.1277			D1D5	19	0.15	0.16	0.31	21.5318	69.4573
BL	17	0.14	0.25	0.39	17.2323	44.1853			D1D5	19	0.14	0.18	0.32	19.6742	61.4818
BL	17	0.14	0.23	0.37	15.4902	41.8655			D1D5	19	0.15	0.21	0.36	20.8272	57.8532
BL	17	0.16	0.16	0.32	22.1396	69.1862			D1D5	19	0.15	0.17	0.32	22.1217	69.1304
BL	17	0.14	0.13	0.27	20.7919	77.0071			D1D5	19	0.15	0.17	0.32	16.8596	52.6862
BL	17	0.15	0.15	0.3	22.0736	73.5787			D1D5	19	0.1	0.17	0.27	18.0089	66.6998
BL	17	0.15	0.21	0.36	16.0123	44.4787			D1D5	19	0.13	0.15	0.28	19.6158	70.0566
BL	17	0.13	0.27	0.4	15.5543	38.8857			D1D5	19	0.11	0.11	0.22	21.6759	98.5267
BL	17	0.16	0.31	0.47	12.5268	26.6527			D1D5	19	0.12	0.13	0.25	21.535	86.14
BL	17	0.14	0.35	0.49	13.3009	27.1447			D1D5	20	0.12	0.14	0.26	20.8379	80.1457
BL	17	0.17	0.28	0.45	17.4914	38.8697			D1D5	20	0.15	0.14	0.29	21.8926	75.4918
BL	17	0.14	0.29	0.43	12.2654	28.5241			D1D5	20	0.13	0.13	0.26	22.3705	86.0405
BL	17	0.16	0.26	0.42	17.6364	41.9915			D1D5	20	0.14	0.14	0.28	19.1841	68.5148
BL	17	0.14	0.24	0.38	18.2197	47.9465			D1D5	20	0.11	0.14	0.25	22.0198	88.0793
BL	18	0.1	0.21	0.31	15.2994	49.3529			D1D5	20	0.12	0.12	0.24	22.4012	93.3385
BL	18	0.13	0.32	0.45	16.0618	35.6929			D1D5	20	0.11	0.13	0.24	20.311	84.6293
BL	18	0.14	0.2	0.34	12.7087	37.3785			D1D5	20	0.14	0.13	0.27	23.0406	85.3355
BL	18	0.12	0.2	0.32	15.6738	48.9806			D1D5	20	0.13	0.13	0.26	22.7785	87.6094
BL	18	0.14	0.18	0.32	18.7744	58.6699			D1D5	20	0.14	0.13	0.27	21.7686	80.6246
BL	18	0.18	0.24	0.42	15.7359	37.4663			D1D5	20	0.13	0.16	0.29	17.4221	60.0764
BL	18	0.14	0.18	0.32	19.3792	60.5601			D1D5	20	0.14	0.15	0.29	19.3694	66.7909
BL	18	0.18	0.21	0.39	15.3268	39.2996			D1D8	2	0.12	0.12	0.24	21.784	90.7665
BL	18	0.14	0.29	0.43	16.7566	38.9689			D1D8	2	0.12	0.12	0.24	19.5642	81.5174
BL	18	0.16	0.22	0.38	15.2982	40.2583			D1D8	2	0.15	0.13	0.28	21.551	76.9679
BL	18	0.13	0.23	0.36	17.4432	48.4533			D1D8	2	0.12	0.16	0.28	18.5085	66.1016
BL	18	0.13	0.19	0.32	20.0973	62.8039			D1D8	2	0.14	0.12	0.26	23.6439	90.9379
BL	18	0.15	0.31	0.46	15.744	34.226			D1D8	2	0.13	0.11	0.24	22.3924	93.3017
BL	18	0.13	0.22	0.35	15.5467	44.4192			D1D8	2	0.15	0.12	0.27	22.8885	84.7722
BL	19	0.16	0.24	0.4	14.9051	37.2627			D1D8	2	0.14	0.14	0.28	18.6464	66.5944
BL	19	0.14	0.18	0.32	17.8826	55.8831			D1D8	2	0.16	0.16	0.32	20.1157	62.8614
BL	19	0.15	0.21	0.36	16.7073	46.4092			D1D8	2	0.12	0.19	0.31	14.9841	48.3358
BL	19	0.13	0.17	0.3	18.5614	61.8713			D1D8	2	0.13	0.11	0.24	24.7512	103.13
BL	19	0.16	0.17	0.33	21.7808	66.0026			D1D8	2	0.1	0.12	0.22	19.1307	86.9576
BL	19	0.15	0.15	0.3	19.617	65.3901			D1D8	3	0.12	0.1	0.22	24.0844	109.474
BL	19	0.14	0.16	0.3	16.6436	55.4787			D1D8	3	0.12	0.09	0.21	23.6362	112.553
BL	19	0.14	0.18	0.32	20.6699	64.5936			D1D8	3	0.13	0.13	0.26	21.1818	81.4684
BL	19	0.15	0.14	0.29	16.7049	57.6032			D1D8	3	0.13	0.11	0.24	21.8166	90.9024
BL	19	0.17	0.19	0.36	14.1147	39.2075			D1D8	3	0.14	0.19	0.33	19.7503	59.8494
BL	19	0.14	0.14	0.28	17.9422	64.0794			D1D8	3	0.14	0.12	0.26	20.5014	78.8514
BL	19	0.15	0.18	0.33	18.375	55.6818			D1D8	3	0.14	0.11	0.25	21.1832	84.733
BL	20	0.15	0.18	0.33	18.3675	55.6592			D1D8	3	0.12	0.13	0.25	20.6195	82.478
BL	20	0.15	0.19	0.34	17.1224	50.36			D1D8	3	0.14	0.13	0.27	21.1188	78.2178
BL	20	0.17	0.21	0.38	16.3669	43.0709			D1D8	3	0.13	0.11	0.24	22.6181	94.2422
BL	20	0.17	0.21	0.38	17.253	45.4025			D1D8	3	0.12	0.11	0.23	22.0039	95.669
BL	20	0.17	0.23	0.4	16.6243	41.5607			D1D8	4	0.14	0.22	0.36	18.8253	52.2926
BL	20	0.19	0.21	0.4	18.1109	45.2774			D1D8	4	0.15	0.14	0.29	22.7759	78.5377
BL	20	0.14	0.12	0.26	19.0365	73.2172			D1D8	4	0.13	0.14	0.27	22.6257	83.7988
BL	20	0.12	0.15	0.27	17.0593	63.1828			D1D8	4	0.14	0.15	0.29	20.9274	72.1634
BL	20	0.13	0.17	0.3	18.5048	61.6826			D1D8	4	0.13	0.12	0.25	22.7857	91.1426
BL	20	0.16	0.19	0.35	19.4555	55.587			D1D8	4	0.14	0.13	0.27	17.8217	66.0063
BL	20	0.15	0.16	0.31	17.6492	56.9328			D1D8	4	0.14	0.19	0.33	19.3554	58.6528
BL	20	0.13	0.16	0.29	19.0558	65.7098			D1D8	4	0.14	0.15	0.29	21.5514	74.3151
PD1	2	0.11	0.14	0.25	20.3848	81.5394			D1D8	4	0.13	0.14	0.27	21.1076	78.1763
PD1	2	0.14	0.14	0.28	23.7439	84.7998			D1D8	4	0.13	0.12	0.25	23.9784	95.9134
PD1	2	0.15	0.23	0.38	14.8337	39.0361			D1D8	5	0.12	0.23	0.35	17.6772	50.5064
PD1	2	0.14	0.18	0.32	23.7566	74.2394			D1D8	5	0.14	0.2	0.34	19.8322	58.3299
PD1	2	0.13	0.26	0.39	15.6522	40.1337			D1D8	5	0.15	0.16	0.31	20.7572	66.9586
PD1	2	0.16	0.22	0.38	15.4327	40.6124			D1D8	5	0.15	0.15	0.3	21.2955	70.9849
PD1	2	0.12	0.35	0.47	12.5711	26.7471			D1D8	5	0.15	0.14	0.29	20.1676	69.5435
PD1	2	0.16	0.14	0.3	21.1188	70.3961			D1D8	5	0.15	0.14	0.29	20.1912	69.625
PD1	2	0.16	0.15	0.31	21.3118	68.7478			D1D8	5	0.15	0.21	0.36	17.9382	49.8283
PD1	2	0.15	0.21	0.36	19.3706	53.8072			D1D8	5	0.15	0.31	0.46	16.413	35.6805
PD1	2	0.12	0.17	0.29	18.2	62.7586			D1D8	5	0.13	0.22	0.35	17.8654	51.044
PD1	2	0.11	0.3	0.41	16.7645	40.889			D1D8	5	0.14	0.17	0.31	16.1004	51.9368
PD1	2	0.14	0.19	0.33	19.7454	59.8347			D1D8	5	0.13	0.12	0.25	21.8136	87.2546
PD1	2	0.15	0.16	0.31	23.0574	74.3788			D1D8	5	0.13	0.13	0.26	18.5176	71.2215
PD1	3	0.12	0.15	0.27	18.1835	67.3462			D1D8	6	0.12	0.17	0.29	18.5734	64.0464
PD1	3	0.16	0.18	0.34	20.8365	61.2838			D1D8	6	0.12	0.13	0.25	22.8771	91.5084
PD1	3	0.14	0.17	0.31	19.6214	63.295			D1D8	6	0.14	0.19	0.33	18.9767	57.5051
PD1	3	0.14	0.17	0.31	18.2828	58.9769			D1D8	6	0.13	0.18	0.31	18.2251	58.7906
PD1	3	0.15	0.17	0.32	17.6638	55.1994			D1D8	6	0.14	0.18	0.32	19.7805	61.8141
PD1	3	0.13	0.15	0.28	19.1841	68.5147			D1D8	6	0.13	0.15	0.28	22.1194	78.9977
PD1	3	0.14	0.15	0.29	19.0115	65.557			D1D8	6	0.15	0.14	0.29	22.9191	79.0314
PD1	3	0.16	0.18	0.34	17.9971	52.9326			D1D8	6	0.16	0.12	0.28	19.9265	71.166
PD1	3	0.14	0.15	0.29	19.6815	67.8671			D1D8	6	0.11	0.12	0.23	18.8965	82.1589
PD1	3	0.15	0.17	0.32	19.8143	61.9198			D1D8	6	0.16	0.18	0.34	17.0771	50.2268
PD1	3	0.14	0.17	0.31	16.9976	54.8308			D1D8	6	0.12	0.18	0.3	17.6335	58.7784
PD1	3	0.15	0.17	0.32	18.8481	58.9004			D1D8	6	0.13	0.15	0.28	20.9241	74.7288
PD1	3	0.18	0.24	0.42	14.3727	34.2207			D1D8	7	0.13	0.09	0.22	26.4987	120.449
PD1	4	0.15	0.24	0.39	16.858	43.2255			D1D8	7	0.11	0.1	0.21	25.3227	120.584
PD1	4	0.17	0.32	0.49	16.6173	33.9129			D1D8	7	0.14	0.18	0.32	20.7658	64.893
PD1	4	0.16	0.25	0.41	17.5829	42.8852			D1D8	7	0.13	0.21	0.34	17.8331	52.4503
PD1	4	0.15	0.27	0.42	14.6974	34.9938			D1D8	7	0.14	0.15	0.29	20.9909	72.3825
PD1	4	0.15	0.25	0.4	16.8507	42.1268			D1D8	7	0.15	0.16	0.31	23.3987	75.4796
PD1	4	0.14	0.31	0.45	15.6169	34.7042			D1D8	7	0.14	0.14	0.28	23.773	84.9036
PD1	4	0.15	0.29	0.44	15.8598	36.045			D1D8	7	0.15	0.12	0.27	21.3669	79.1365
PD1	4	0.16	0.27	0.43	15.4983	36.0426			D1D8	7	0.13	0.21	0.34	17.276	50.8118
PD1	4	0.13	0.32	0.45	13.7008	30.4462			D1D8	8	0.13	0.12	0.25	20.2447	80.9788
PD1	4	0.11	0.29	0.4	15.6947	39.2367			D1D8	8	0.14	0.13	0.27	18.9712	70.2638
PD1	4	0.15	0.2	0.35	16.8539	48.154			D1D8	8	0.17	0.16	0.33	18.8463	57.1099
PD1	4	0.17	0.21	0.38	19.5628	51.481			D1D8	8	0.16	0.16	0.32	19.2683	60.2133
PD1	4	0.14	0.22	0.36	18.2677	50.7436			D1D8	8	0.16	0.16	0.32	18.9697	59.2802
PD1	5	0.16	0.26	0.42	13.4543	32.0342			D1D8	8	0.16	0.17	0.33	19.1241	57.9518
PD1	5	0.17	0.2	0.37	17.5572	47.4518			D1D8	8	0.14	0.13	0.27	19.7564	73.1719
PD1	5	0.16	0.18	0.34	17.9431	52.7739			D1D8	8	0.13	0.11	0.24	20.6764	86.1516
PD1	5	0.12	0.16	0.28	16.9425	60.5088			D1D8	8	0.15	0.13	0.28	19.5739	69.9068
PD1	5	0.15	0.25	0.4	15.852	39.63			D1D8	8	0.15	0.12	0.27	19.0463	70.5417
PD1	5	0.18	0.22	0.4	17.9365	44.8414			D1D8	8	0.15	0.15	0.3	20.9798	69.9328
PD1	5	0.15	0.17	0.32	19.8315	61.9735			D1D8	8	0.13	0.13	0.26	19.0291	73.1888
PD1	5	0.14	0.31	0.45	13.7795	30.621			D1D8	9	0.15	0.15	0.3	17.7464	59.1548
PD1	5	0.14	0.3	0.44	17.5595	39.9079			D1D8	9	0.13	0.13	0.26	21.6732	83.3584
PD1	5	0.17	0.15	0.32	19.3753	60.5477			D1D8	9	0.11	0.12	0.23	21.6781	94.2527
PD1	5	0.15	0.15	0.3	18.5061	61.6869			D1D8	9	0.12	0.11	0.23	22.3615	97.2238
PD1	5	0.14	0.19	0.33	16.4302	49.7884			D1D8	9	0.1	0.12	0.22	20.5134	93.2428
PD1	5	0.13	0.12	0.25	18.9182	75.6727			D1D8	9	0.1	0.09	0.19	20.5495	108.155
PD1	5	0.14	0.14	0.28	22.9266	81.8807			D1D8	9	0.13	0.13	0.26	21.7241	83.5543
PD1	6	0.13	0.12	0.25	20.5528	82.2111			D1D8	9	0.13	0.12	0.25	23.0505	92.2018
PD1	6	0.14	0.15	0.29	21.5557	74.3301			D1D8	9	0.13	0.11	0.24	22.9881	95.7837
PD1	6	0.15	0.3	0.45	16.6264	36.9477			D1D8	9	0.12	0.11	0.23	22.0399	95.8256
PD1	6	0.13	0.17	0.3	19.528	65.0935			D1D8	9	0.11	0.11	0.22	23.3774	106.261
PD1	6	0.13	0.15	0.28	20.666	73.807			D1D8	10	0.13	0.13	0.26	20.2563	77.909
PD1	6	0.14	0.15	0.29	21.55	74.3104			D1D8	10	0.12	0.11	0.23	21.3374	92.7713
PD1	6	0.12	0.18	0.3	18.1139	60.3797			D1D8	10	0.15	0.21	0.36	17.7526	49.3128
PD1	6	0.13	0.17	0.3	20.1659	67.2197			D1D8	10	0.15	0.2	0.35	17.3849	49.6711
PD1	6	0.15	0.15	0.3	19.6356	65.4521			D1D8	10	0.17	0.27	0.44	16.6257	37.7856
PD1	6	0.14	0.15	0.29	20.3495	70.1708			D1D8	10	0.15	0.19	0.34	16.2517	47.7991
PD1	6	0.13	0.09	0.22	22.0671	100.305			D1D8	10	0.17	0.17	0.34	18.3915	54.0927
PD1	6	0.12	0.12	0.24	21.5075	89.6145			D1D8	10	0.16	0.22	0.38	16.3835	43.1144
PD1	7	0.14	0.16	0.3	22.3383	74.4608			D1D8	10	0.13	0.16	0.29	19.8744	68.5324
PD1	7	0.18	0.33	0.51	16.2121	31.7885			D1D8	10	0.12	0.13	0.25	19.5731	78.2925
PD1	7	0.13	0.23	0.36	18.3952	51.0977			D1D8	10	0.14	0.15	0.29	19.7114	67.9705
PD1	7	0.15	0.15	0.3	19.6194	65.3979			D1D8	10	0.13	0.14	0.27	19.8111	73.3744
PD1	7	0.15	0.22	0.37	17.2811	46.7057			D1D8	11	0.15	0.19	0.34	18.853	55.45
PD1	7	0.14	0.16	0.3	18.6251	62.0837			D1D8	11	0.15	0.18	0.33	19.4079	58.8117
PD1	7	0.12	0.13	0.25	19.3791	77.5163			D1D8	11	0.18	0.23	0.41	17.7942	43.4004
PD1	7	0.14	0.13	0.27	22.1556	82.0578			D1D8	11	0.17	0.18	0.35	19.9383	56.9667
PD1	7	0.13	0.22	0.35	17.155	49.0142			D1D8	11	0.19	0.25	0.44	16.7834	38.1442
PD1	7	0.14	0.25	0.39	18.2594	46.8191			D1D8	11	0.15	0.28	0.43	19.1382	44.5075
PD1	7	0.15	0.15	0.3	19.2794	64.2646			D1D8	11	0.17	0.19	0.36	20.32	56.4444
PD1	7	0.14	0.16	0.3	16.0721	53.5737			D1D8	11	0.18	0.23	0.41	16.2768	39.6996
PD1	8	0.17	0.15	0.32	17.8208	55.69			D1D8	11	0.18	0.32	0.5	14.57	29.1399
PD1	8	0.14	0.19	0.33	17.6619	53.5209			D1D8	11	0.18	0.24	0.42	16.0569	38.2307
PD1	8	0.19	0.18	0.37	13.1233	35.4683			D1D8	11	0.22	0.32	0.54	16.6959	30.9183
PD1	8	0.13	0.22	0.35	17.385	49.6715			D1D8	11	0.15	0.2	0.35	18.1482	51.852
PD1	8	0.16	0.21	0.37	19.4909	52.6782			D1D8	11	0.16	0.22	0.38	18.5519	48.8207
PD1	8	0.15	0.17	0.32	15.1141	47.2317			D1D8	12	0.11	0.19	0.3	16.467	54.89
PD1	8	0.15	0.19	0.34	18.5902	54.6771			D1D8	12	0.15	0.17	0.32	21.2982	66.5569
PD1	8	0.19	0.23	0.42	16.3962	39.0385			D1D8	12	0.13	0.12	0.25	22.3899	89.5594
PD1	8	0.15	0.16	0.31	19.0655	61.5016			D1D8	12	0.16	0.17	0.33	16.9228	51.2811
PD1	8	0.16	0.19	0.35	19.1891	54.826			D1D8	12	0.15	0.16	0.31	23.4709	75.7127
PD1	8	0.18	0.16	0.34	18.0054	52.957			D1D8	12	0.14	0.11	0.25	25.6313	102.525
PD1	8	0.17	0.16	0.33	19.4314	58.883			D1D8	12	0.13	0.1	0.23	24.2075	105.25
PD1	8	0.15	0.16	0.31	19.5505	63.066			D1D8	12	0.15	0.09	0.24	25.3818	105.758
PD1	9	0.12	0.22	0.34	17.7531	52.2151			D1D8	12	0.14	0.15	0.29	20.9923	72.3872
PD1	9	0.12	0.22	0.34	19.093	56.1558			D1D8	12	0.14	0.11	0.25	23.402	93.6082
PD1	9	0.12	0.15	0.27	18.4624	68.3794			D1D8	13	0.14	0.23	0.37	15.9843	43.2009
PD1	9	0.12	0.15	0.27	20.5678	76.1771			D1D8	13	0.12	0.14	0.26	24.181	93.0037
PD1	9	0.13	0.21	0.34	17.8386	52.4665			D1D8	13	0.16	0.14	0.3	23.7228	79.0759
PD1	9	0.14	0.18	0.32	21.5558	67.3618			D1D8	13	0.14	0.13	0.27	18.6742	69.1636
PD1	9	0.13	0.2	0.33	20.2937	61.496			D1D8	13	0.13	0.16	0.29	15.6071	53.8175
PD1	9	0.14	0.14	0.28	20.7388	74.0671			D1D8	13	0.16	0.21	0.37	19.499	52.7
PD1	9	0.14	0.16	0.3	21.7107	72.369			D1D8	13	0.14	0.21	0.35	18.3224	52.3498
PD1	9	0.11	0.15	0.26	19.975	76.8269			D1D8	13	0.15	0.24	0.39	19.5046	50.0117
PD1	9	0.14	0.19	0.33	20.2294	61.3012			D1D8	13	0.11	0.12	0.23	22.8246	99.2372
PD1	9	0.14	0.15	0.29	19.0896	65.8263			D1D8	13	0.14	0.1	0.24	25.2405	105.169
PD1	10	0.14	0.3	0.44	15.9422	36.2322			D1D8	14	0.15	0.19	0.34	19.8045	58.2484
PD1	10	0.13	0.24	0.37	15.695	42.4189			D1D8	14	0.16	0.19	0.35	20.8099	59.4568
PD1	10	0.15	0.25	0.4	17.2659	43.1647			D1D8	14	0.13	0.13	0.26	21.3026	81.9331
PD1	10	0.17	0.2	0.37	19.1084	51.6443			D1D8	14	0.14	0.11	0.25	23.5772	94.3087
PD1	10	0.15	0.35	0.5	14.2125	28.425			D1D8	14	0.14	0.12	0.26	19.9128	76.5875
PD1	10	0.13	0.25	0.38	15.3136	40.2989			D1D8	14	0.12	0.13	0.25	17.8974	71.5895
PD1	10	0.13	0.18	0.31	16.8874	54.4753			D1D8	14	0.15	0.16	0.31	17.3914	56.1013
PD1	10	0.12	0.25	0.37	15.0654	40.7174			D1D8	14	0.16	0.19	0.35	19.6988	56.2823
PD1	10	0.15	0.2	0.35	18.092	51.6913			D1D8	14	0.17	0.13	0.3	20.4265	68.0885
PD1	10	0.14	0.22	0.36	16.0852	44.6811			D1D8	14	0.12	0.23	0.35	14.877	42.5056
PD1	10	0.14	0.22	0.36	17.0203	47.2787			D1D8	14	0.12	0.19	0.31	14.9829	48.3318
PD1	10	0.14	0.23	0.37	15.8965	42.9634			D1D8	14	0.15	0.2	0.35	16.8523	48.1494
PD1	10	0.14	0.2	0.34	18.0435	53.069			D1D8	14	0.15	0.16	0.31	20.5495	66.2886
PD1	11	0.2	0.24	0.44	17.3955	39.5353			D1D8	14	0.16	0.13	0.29	21.7516	75.0055
PD1	11	0.16	0.24	0.4	17.899	44.7476			D1D8	15	0.16	0.16	0.32	21.1591	66.1222
PD1	11	0.18	0.16	0.34	21.0164	61.8129			D1D8	15	0.17	0.15	0.32	21.035	65.7343
PD1	11	0.2	0.18	0.38	21.5877	56.8096			D1D8	15	0.14	0.12	0.26	20.491	78.8114
PD1	11	0.19	0.18	0.37	19.5294	52.7822			D1D8	15	0.19	0.17	0.36	18.1509	50.4191
PD1	11	0.18	0.17	0.35	19.6704	56.2011			D1D8	15	0.14	0.16	0.3	18.9385	63.1284
PD1	11	0.15	0.14	0.29	19.7996	68.2746			D1D8	15	0.15	0.14	0.29	20.2962	69.987
PD1	11	0.14	0.15	0.29	21.0024	72.4221			D1D8	15	0.17	0.22	0.39	17.4728	44.802
PD1	11	0.18	0.15	0.33	19.6069	59.4148			D1D8	15	0.18	0.18	0.36	18.2857	50.7937
PD1	11	0.18	0.15	0.33	21.4408	64.972			D1D8	15	0.17	0.28	0.45	14.9567	33.237
PD1	11	0.19	0.17	0.36	19.3797	53.8325			D1D8	15	0.16	0.2	0.36	16.7055	46.4043
PD1	11	0.19	0.18	0.37	20.4289	55.2131			D1D8	15	0.15	0.24	0.39	17.9685	46.0732
PD1	12	0.15	0.13	0.28	21.7839	77.7995			D1D8	15	0.19	0.19	0.38	20.1827	53.1124
PD1	12	0.14	0.12	0.26	21.8424	84.0093			D1D8	15	0.15	0.21	0.36	18.3851	51.0696
PD1	12	0.16	0.15	0.31	23.8115	76.8113			D1D8	16	0.15	0.11	0.26	24.2672	93.3355
PD1	12	0.14	0.12	0.26	23.3202	89.693			D1D8	16	0.12	0.11	0.23	17.4267	75.7683
PD1	12	0.15	0.13	0.28	22.7663	81.3082			D1D8	16	0.14	0.21	0.35	16.2149	46.3282
PD1	12	0.16	0.13	0.29	23.6611	81.5902			D1D8	16	0.16	0.21	0.37	19.0683	51.5359
PD1	12	0.15	0.14	0.29	22.4043	77.2562			D1D8	16	0.13	0.2	0.33	14.5792	44.1795
PD1	12	0.17	0.18	0.35	23.3798	66.7994			D1D8	16	0.11	0.17	0.28	16.7397	59.7846
PD1	12	0.17	0.18	0.35	19.684	56.2399			D1D8	16	0.15	0.14	0.29	22.2785	76.8225
PD1	12	0.17	0.13	0.3	24.0804	80.2681			D1D8	16	0.14	0.13	0.27	19.8203	73.4087
PD1	13	0.13	0.22	0.35	20.1266	57.5047			D1D8	16	0.14	0.14	0.28	18.2504	65.1802
PD1	13	0.14	0.24	0.38	20.6907	54.4491			D1D8	16	0.16	0.19	0.35	16.1683	46.1952
PD1	13	0.13	0.24	0.37	15.0634	40.7118			D1D8	16	0.14	0.17	0.31	19.9459	64.3417
PD1	13	0.14	0.2	0.34	18.37	54.0295			D1D8	16	0.14	0.14	0.28	22.1006	78.9306
PD1	13	0.11	0.17	0.28	19.7456	70.52			D1D8	17	0.16	0.24	0.4	18.2728	45.682
PD1	13	0.14	0.16	0.3	21.2832	70.9439			D1D8	17	0.17	0.25	0.42	19.8168	47.1829
PD1	13	0.14	0.16	0.3	22.9168	76.3894			D1D8	17	0.17	0.26	0.43	20.026	46.572
PD1	13	0.13	0.18	0.31	19.8697	64.0959			D1D8	17	0.14	0.22	0.36	19.5664	54.3511
PD1	13	0.13	0.14	0.27	21.4127	79.3063			D1D8	17	0.16	0.25	0.41	19.3211	47.1246
PD1	13	0.13	0.15	0.28	21.7712	77.7543			D1D8	17	0.16	0.21	0.37	21.05	56.8918
PD1	13	0.17	0.16	0.33	20.6265	62.5045			D1D8	17	0.19	0.36	0.55	17.4062	31.6477
PD1	13	0.12	0.2	0.32	18.7917	58.724			D1D8	17	0.17	0.32	0.49	16.29	33.2448
PD1	13	0.14	0.21	0.35	19.1453	54.701			D1D8	17	0.19	0.34	0.53	15.1243	28.5363
PD1	14	0.15	0.28	0.43	15.4396	35.9061			D1D8	17	0.18	0.32	0.5	18.9362	37.8725
PD1	14	0.15	0.28	0.43	18.6647	43.4063			D1D8	17	0.16	0.33	0.49	17.0367	34.7687
PD1	14	0.16	0.24	0.4	18.2272	45.568			D1D8	17	0.15	0.19	0.34	18.7811	55.2385
PD1	14	0.15	0.21	0.36	19.295	53.5971			D1D8	17	0.16	0.21	0.37	19.1964	51.8822
PD1	14	0.15	0.17	0.32	19.8503	62.0321			D1D8	18	0.13	0.17	0.3	22.0258	73.4192
PD1	14	0.15	0.2	0.35	19.1759	54.7883			D1D8	18	0.13	0.12	0.25	25.6633	102.653
PD1	14	0.16	0.28	0.44	17.9261	40.7411			D1D8	18	0.14	0.13	0.27	25.176	93.2443
PD1	14	0.15	0.21	0.36	20.0379	55.6608			D1D8	18	0.13	0.12	0.25	24.9483	99.793
PD1	14	0.16	0.22	0.38	18.3559	48.305			D1D8	18	0.15	0.12	0.27	21.7016	80.3761
PD1	14	0.15	0.25	0.4	17.6841	44.2102			D1D8	18	0.13	0.1	0.23	24.5085	106.559
PD1	14	0.15	0.24	0.39	17.229	44.1769			D1D8	18	0.14	0.12	0.26	24.4438	94.0147
PD1	14	0.13	0.31	0.44	15.9844	36.3282			D1D8	18	0.11	0.12	0.23	17.5566	76.3329
PD1	14	0.17	0.31	0.48	18.3525	38.2344			D1D8	19	0.12	0.12	0.24	20.951	87.2959
PD1	14	0.15	0.25	0.4	15.1073	37.7683			D1D8	19	0.16	0.15	0.31	21.6265	69.763
PD1	14	0.16	0.28	0.44	17.9179	40.7226			D1D8	19	0.14	0.12	0.26	24.5259	94.3302
PD1	15	0.16	0.28	0.44	16.3381	37.132			D1D8	19	0.12	0.09	0.21	23.6915	112.817
PD1	15	0.17	0.23	0.4	17.1291	42.8228			D1D8	19	0.13	0.2	0.33	20.2561	61.3822
PD1	15	0.16	0.25	0.41	17.0592	41.6079			D1D8	19	0.1	0.13	0.23	19.4411	84.5267
PD1	15	0.17	0.2	0.37	18.3219	49.5187			D1D8	19	0.12	0.08	0.2	23.2148	116.074
PD1	15	0.15	0.2	0.35	18.781	53.6599			D1D8	19	0.11	0.09	0.2	23.5241	117.62
PD1	15	0.15	0.19	0.34	17.316	50.9293			D1D8	19	0.11	0.12	0.23	22.7555	98.937
PD1	15	0.16	0.27	0.43	16.1756	37.6178			D1D8	19	0.13	0.11	0.24	23.8832	99.5135
PD1	15	0.19	0.24	0.43	17.6835	41.1245			D1D8	19	0.11	0.18	0.29	17.1255	59.0534
PD1	15	0.19	0.26	0.45	17.0404	37.8675			D1D8	19	0.13	0.15	0.28	19.5627	69.8667
PD1	15	0.15	0.2	0.35	17.9431	51.266			D1D8	20	0.14	0.22	0.36	19.9511	55.4196
PD1	15	0.15	0.19	0.34	18.3258	53.8995			D1D8	20	0.13	0.19	0.32	19.2686	60.2143
PD1	15	0.16	0.16	0.32	18.7597	58.6241			D1D8	20	0.14	0.15	0.29	20.5924	71.0082
PD1	15	0.17	0.22	0.39	16.7531	42.9568			D1D8	20	0.12	0.14	0.26	19.939	76.6885
PD1	15	0.13	0.27	0.4	14.8549	37.1373			D1D8	20	0.16	0.14	0.3	21.4129	71.3762
PD1	16	0.16	0.2	0.36	21.852	60.7001			D1D8	20	0.14	0.13	0.27	21.5866	79.9504
PD1	16	0.14	0.15	0.29	17.9726	61.9746			D1D8	20	0.13	0.15	0.28	20.8544	74.4801
PD1	16	0.15	0.21	0.36	18.6357	51.766			D1D8	20	0.14	0.15	0.29	19.9412	68.7629
PD1	16	0.15	0.23	0.38	14.1109	37.1339			D1D8	20	0.13	0.2	0.33	17.7464	53.7771
PD1	16	0.12	0.31	0.43	10.7382	24.9727			D1D8	20	0.12	0.21	0.33	19.2107	58.2141
PD1	16	0.14	0.2	0.34	15.1166	44.4606			D1D8	20	0.14	0.26	0.4	15.6098	39.0244
PD1	16	0.14	0.17	0.31	18.7271	60.4098			D1D8	20	0.13	0.24	0.37	15.9812	43.1924
PD1	16	0.14	0.26	0.4	16.7926	41.9815			D2D5	5	0.14	0.19	0.33	18.0888	54.8144
PD1	16	0.17	0.21	0.38	18.56	48.8421			D2D5	5	0.15	0.14	0.29	22.4201	77.3105
PD1	16	0.16	0.22	0.38	17.5411	46.1608			D2D5	5	0.12	0.12	0.24	23.9602	99.8342
PD1	16	0.16	0.16	0.32	19.1719	59.912			D2D5	5	0.11	0.1	0.21	23.2133	110.54
PD1	16	0.14	0.17	0.31	18.9965	61.2791			D2D5	5	0.13	0.14	0.27	21.9501	81.2967
PD1	16	0.15	0.21	0.36	17.9585	49.8848			D2D5	5	0.13	0.11	0.24	22.8446	95.1857
PD1	17	0.15	0.32	0.47	15.9836	34.0076			D2D5	5	0.11	0.15	0.26	18.9748	72.9801
PD1	17	0.18	0.25	0.43	18.5316	43.0967			D2D5	5	0.13	0.13	0.26	23.173	89.127
PD1	17	0.19	0.24	0.43	18.1108	42.1182			D2D5	5	0.12	0.11	0.23	20.187	87.7695
PD1	17	0.16	0.23	0.39	19.5878	50.2251			D2D5	5	0.12	0.13	0.25	20.2477	80.9908
PD1	17	0.19	0.19	0.38	20.2115	53.1883			D2D5	6	0.11	0.1	0.21	21.8312	103.958
PD1	17	0.17	0.17	0.34	20.4617	60.1814			D2D5	6	0.11	0.1	0.21	22.4403	106.858
PD1	17	0.16	0.16	0.32	20.5864	64.3324			D2D5	6	0.12	0.09	0.21	22.5661	107.458
PD1	17	0.22	0.17	0.39	21.9616	56.3119			D2D5	6	0.11	0.09	0.2	21.8933	109.466
PD1	17	0.15	0.21	0.36	14.9709	41.5859			D2D5	6	0.11	0.08	0.19	22.0743	116.181
PD1	17	0.14	0.12	0.26	21.8952	84.2125			D2D5	6	0.1	0.08	0.18	20.3104	112.836
PD1	17	0.16	0.14	0.3	20.713	69.0434			D2D5	6	0.1	0.09	0.19	21.0365	110.718
PD1	18	0.18	0.28	0.46	16.6572	36.2114			D2D5	6	0.11	0.1	0.21	21.708	103.371
PD1	18	0.14	0.3	0.44	17.2666	39.2423			D2D5	6	0.1	0.09	0.19	20.9769	110.405
PD1	18	0.15	0.16	0.31	21.5684	69.5755			D2D5	7	0.12	0.12	0.24	21.6651	90.2713
PD1	18	0.15	0.16	0.31	19.9274	64.2818			D2D5	7	0.11	0.08	0.19	28.9199	152.21
PD1	18	0.13	0.34	0.47	18.5947	39.5632			D2D5	7	0.13	0.11	0.24	26.2325	109.302
PD1	18	0.15	0.29	0.44	19.3765	44.0375			D2D5	7	0.11	0.08	0.19	26.6902	140.475
PD1	18	0.15	0.17	0.32	17.9709	56.1589			D2D5	7	0.13	0.09	0.22	26.4298	120.136
PD1	18	0.15	0.16	0.31	20.6818	66.7155			D2D5	7	0.12	0.09	0.21	28.6478	136.418
PD1	18	0.15	0.18	0.33	20.8242	63.1036			D2D5	7	0.1	0.08	0.18	21.4798	119.332
PD1	18	0.15	0.2	0.35	19.686	56.2457			D2D5	7	0.12	0.08	0.2	27.6524	138.262
PD1	18	0.15	0.17	0.32	18.8475	58.8983			D2D5	8	0.17	0.16	0.33	20.5573	62.295
PD1	18	0.16	0.19	0.35	21.3772	61.0778			D2D5	8	0.15	0.16	0.31	20.5	66.129
PD1	19	0.15	0.19	0.34	16.2156	47.6929			D2D5	8	0.09	0.08	0.17	23.8456	140.268
PD1	19	0.13	0.21	0.34	16.5204	48.5895			D2D5	8	0.1	0.09	0.19	23.759	125.047
PD1	19	0.17	0.16	0.33	16.9291	51.3004			D2D5	8	0.1	0.09	0.19	24.2754	127.765
PD1	19	0.13	0.15	0.28	20.1191	71.854			D2D5	8	0.09	0.09	0.18	19.6349	109.083
PD1	19	0.14	0.14	0.28	19.2764	68.8444			D2D5	8	0.09	0.07	0.16	28.4913	178.071
PD1	19	0.15	0.21	0.36	20.0032	55.5645			D2D5	8	0.09	0.08	0.17	24.9225	146.603
PD1	19	0.13	0.12	0.25	20.9701	83.8802			D2D5	8	0.08	0.12	0.2	18.0232	90.1159
PD1	19	0.15	0.16	0.31	18.1702	58.6135			D2D5	8	0.11	0.09	0.2	22.9893	114.946
PD1	19	0.16	0.16	0.32	18.7174	58.492			D2D5	8	0.1	0.09	0.19	25.0852	132.027
PD1	19	0.16	0.16	0.32	21.0306	65.7206			D2D5	13	0.11	0.1	0.21	24.4716	116.532
PD1	19	0.15	0.16	0.31	19.7505	63.7113			D2D5	13	0.11	0.1	0.21	23.9061	113.839
PD1	19	0.13	0.15	0.28	20.422	72.9358			D2D5	13	0.1	0.14	0.24	21.3012	88.7551
PD1	20	0.15	0.18	0.33	19.0089	57.6027			D2D5	13	0.11	0.09	0.2	26.007	130.035
PD1	20	0.16	0.21	0.37	18.1305	49.0014			D2D5	13	0.09	0.1	0.19	25.5735	134.598
PD1	20	0.15	0.19	0.34	17.3778	51.1112			D2D5	13	0.11	0.08	0.19	26.8046	141.077
PD1	20	0.14	0.19	0.33	18.3775	55.6894			D2D5	13	0.09	0.08	0.17	25.3872	149.337
PD1	20	0.17	0.2	0.37	18.1237	48.9831			D2D5	13	0.1	0.1	0.2	21.8308	109.154
PD1	20	0.17	0.37	0.54	14.0128	25.9497			D2D5	13	0.11	0.09	0.2	26.2495	131.247
PD1	20	0.14	0.19	0.33	19.437	58.9001			D2D5	13	0.11	0.08	0.19	22.2472	117.09
PD1	20	0.14	0.17	0.31	19.0611	61.4875			D2D5	14	0.13	0.15	0.28	22.4309	80.1103
PD1	20	0.14	0.25	0.39	18.3864	47.1447			D2D5	14	0.12	0.12	0.24	21.7465	90.6103
PD1	20	0.15	0.19	0.34	18.004	52.953			D2D5	14	0.13	0.14	0.27	22.0565	81.6909
Post D1	2	0.14	0.1	0.24	30.7597	128.165			D2D5	14	0.13	0.11	0.24	23.5553	98.1471
Post D1	2	0.12	0.1	0.22	26.6198	120.999			D2D5	14	0.13	0.15	0.28	16.6852	59.5901
Post D1	2	0.15	0.09	0.24	23.166	96.5249			D2D5	14	0.14	0.16	0.3	20.9468	69.8226
Post D1	2	0.13	0.11	0.24	29.4769	122.821			D2D5	14	0.14	0.13	0.27	18.507	68.5445
Post D1	2	0.12	0.09	0.21	22.3325	106.345			D2D5	14	0.11	0.1	0.21	22.2435	105.921
Post D1	2	0.14	0.12	0.26	25.1774	96.8363			D2D5	14	0.1	0.1	0.2	21.5559	107.78
Post D1	2	0.15	0.14	0.29	21.8035	75.1843			D2D5	14	0.14	0.14	0.28	23.7076	84.6699
Post D1	2	0.17	0.14	0.31	23.2303	74.9366			D2D5	14	0.12	0.1	0.22	21.4317	97.4167
Post D1	2	0.13	0.15	0.28	23.4532	83.7616			D2D5	14	0.13	0.12	0.25	21.3717	85.487
Post D1	2	0.13	0.23	0.36	20.4395	56.7764			D2D5	14	0.12	0.14	0.26	19.7448	75.9414
Post D1	2	0.12	0.15	0.27	20.7646	76.9061			D2D5	17	0.14	0.13	0.27	21.7922	80.7117
Post D1	3	0.12	0.17	0.29	19.0794	65.7912			D2D5	17	0.16	0.14	0.3	24.597	81.99
Post D1	3	0.13	0.12	0.25	23.6987	94.7947			D2D5	17	0.13	0.14	0.27	21.4294	79.3682
Post D1	3	0.1	0.1	0.2	21.4225	107.113			D2D5	17	0.13	0.14	0.27	20.6652	76.5378
Post D1	3	0.12	0.1	0.22	21.1594	96.1792			D2D5	17	0.13	0.15	0.28	21.428	76.5287
Post D1	3	0.14	0.11	0.25	22.6693	90.677			D2D5	17	0.14	0.2	0.34	20.2263	59.4893
Post D1	3	0.13	0.13	0.26	21.3494	82.1129			D2D5	17	0.13	0.14	0.27	22.644	83.8665
Post D1	3	0.13	0.12	0.25	24.7273	98.9092			D2D5	17	0.13	0.13	0.26	21.1099	81.1918
Post D1	3	0.14	0.12	0.26	23.231	89.3499			D2D5	17	0.15	0.14	0.29	22.7593	78.4805
Post D1	3	0.12	0.11	0.23	22.4508	97.612			D2D5	18	0.12	0.09	0.21	25.7534	122.635
Post D1	3	0.14	0.11	0.25	24.3395	97.3581			D2D5	18	0.14	0.1	0.24	20.565	85.6874
Post D1	3	0.13	0.1	0.23	22.7828	99.0556			D2D5	18	0.12	0.12	0.24	13.8103	57.5428
Post D1	4	0.12	0.14	0.26	23.2944	89.594			D2D5	18	0.11	0.08	0.19	26.9369	141.773
Post D1	4	0.14	0.23	0.37	18.2438	49.3077			D2D5	18	0.12	0.09	0.21	24.5834	117.064
Post D1	4	0.14	0.21	0.35	20.3862	58.2461			D2D5	18	0.13	0.13	0.26	25.6474	98.6438
Post D1	4	0.13	0.18	0.31	20.2676	65.3793			D2D5	18	0.13	0.12	0.25	21.0349	84.1395
Post D1	4	0.12	0.22	0.34	19.8104	58.2658			D2D5	18	0.11	0.12	0.23	23.061	100.265
Post D1	4	0.16	0.17	0.33	22.0262	66.7462			D2D5	18	0.12	0.09	0.21	26.8798	127.999
Post D1	4	0.14	0.17	0.31	17.9884	58.027			D2D5	18	0.12	0.11	0.23	20.4451	88.8917
Post D1	4	0.13	0.15	0.28	19.8799	70.9998			D2D5	18	0.11	0.12	0.23	19.7559	85.8954
Post D1	4	0.14	0.15	0.29	17.7941	61.3589			D2D5	18	0.11	0.09	0.2	27.3729	136.865
Post D1	4	0.14	0.15	0.29	21.659	74.6861			D2D8	5	0.14	0.14	0.28	18.5197	66.1419
Post D1	5	0.13	0.14	0.27	23.4874	86.9905			D2D8	5	0.16	0.12	0.28	22.2843	79.5867
Post D1	5	0.15	0.13	0.28	23.5029	83.9388			D2D8	5	0.15	0.09	0.24	24.1379	100.574
Post D1	5	0.14	0.13	0.27	20.2781	75.1043			D2D8	5	0.15	0.1	0.25	20.5777	82.3108
Post D1	5	0.14	0.13	0.27	21.4869	79.5813			D2D8	5	0.14	0.14	0.28	20.7262	74.0221
Post D1	5	0.15	0.15	0.3	20.578	68.5933			D2D8	5	0.18	0.18	0.36	19.2128	53.3689
Post D1	5	0.17	0.13	0.3	19.5695	65.2318			D2D8	5	0.15	0.13	0.28	21.6076	77.17
Post D1	5	0.15	0.25	0.4	18.7724	46.9311			D2D8	5	0.14	0.13	0.27	18.9501	70.1854
Post D1	5	0.16	0.15	0.31	24.8431	80.139			D2D8	5	0.16	0.1	0.26	25.0934	96.513
Post D1	5	0.14	0.14	0.28	21.2202	75.7864			D2D8	5	0.15	0.09	0.24	19.6421	81.8421
Post D1	5	0.17	0.21	0.38	18.7689	49.3918			D2D8	5	0.14	0.12	0.26	20.8339	80.1304
Post D1	5	0.14	0.11	0.25	25.3511	101.404			D2D8	5	0.14	0.14	0.28	20.5543	73.4083
Post D1	5	0.13	0.11	0.24	18.8975	78.7395			D2D8	6	0.13	0.11	0.24	20.6802	86.1674
Post D1	6	0.13	0.12	0.25	24.0988	96.3951			D2D8	6	0.14	0.11	0.25	24.1921	96.7683
Post D1	6	0.13	0.11	0.24	21.9468	91.4449			D2D8	6	0.11	0.1	0.21	23.2048	110.499
Post D1	6	0.12	0.09	0.21	23.654	112.638			D2D8	6	0.12	0.12	0.24	21.184	88.2666
Post D1	6	0.15	0.15	0.3	21.3679	71.2264			D2D8	6	0.13	0.27	0.4	18.219	45.5476
Post D1	6	0.14	0.19	0.33	17.6865	53.5954			D2D8	6	0.14	0.15	0.29	20.9816	72.3504
Post D1	6	0.12	0.12	0.24	20.1874	84.1141			D2D8	6	0.13	0.13	0.26	22.2168	85.4492
Post D1	6	0.1	0.12	0.22	21.4517	97.5076			D2D8	6	0.14	0.15	0.29	20.3642	70.2213
Post D1	6	0.12	0.15	0.27	21.254	78.7185			D2D8	6	0.12	0.13	0.25	20.4375	81.7498
Post D1	6	0.12	0.19	0.31	19.4339	62.6901			D2D8	6	0.12	0.13	0.25	22.6503	90.6014
Post D1	6	0.13	0.13	0.26	23.0223	88.5473			D2D8	6	0.13	0.14	0.27	19.748	73.1406
Post D1	7	0.13	0.09	0.22	25.3512	115.233			D2D8	6	0.16	0.15	0.31	20.7344	66.8853
Post D1	7	0.12	0.12	0.24	22.7514	94.7974			D2D8	7	0.14	0.11	0.25	20.9248	83.6991
Post D1	7	0.14	0.12	0.26	24.0784	92.6094			D2D8	7	0.1	0.11	0.21	20.1071	95.7483
Post D1	7	0.12	0.1	0.22	24.2045	110.02			D2D8	7	0.14	0.1	0.24	23.3212	97.1715
Post D1	7	0.15	0.1	0.25	23.6248	94.4993			D2D8	7	0.12	0.1	0.22	23.7833	108.106
Post D1	7	0.13	0.13	0.26	23.2574	89.4516			D2D8	7	0.13	0.1	0.23	24.3171	105.726
Post D1	7	0.13	0.14	0.27	20.7383	76.8087			D2D8	7	0.13	0.11	0.24	27.6621	115.259
Post D1	7	0.15	0.13	0.28	22.5178	80.4206			D2D8	7	0.11	0.09	0.2	22.8513	114.256
Post D1	7	0.13	0.11	0.24	21.5557	89.8155			D2D8	7	0.17	0.12	0.29	22.6161	77.9866
Post D1	7	0.13	0.12	0.25	22.5	90.0002			D2D8	7	0.16	0.14	0.3	18.3592	61.1972
Post D1	8	0.13	0.11	0.24	24.0238	100.099			D2D8	7	0.14	0.16	0.3	17.7013	59.0043
Post D1	8	0.11	0.09	0.2	23.2832	116.416			D2D8	7	0.12	0.18	0.3	15.684	52.28
Post D1	8	0.11	0.09	0.2	24.0675	120.338			D2D8	7	0.1	0.09	0.19	20.9129	110.068
Post D1	8	0.12	0.08	0.2	24.085	120.425			D2D8	8	0.18	0.13	0.31	17.8225	57.4919
Post D1	8	0.12	0.06	0.18	26.4352	146.862			D2D8	8	0.13	0.17	0.3	17.5715	58.5718
Post D1	8	0.1	0.08	0.18	22.3742	124.301			D2D8	8	0.12	0.19	0.31	16.4064	52.924
Post D1	8	0.12	0.09	0.21	21.1764	100.84			D2D8	8	0.13	0.42	0.55	16.3579	29.7416
Post D1	8	0.11	0.1	0.21	24.2078	115.275			D2D8	8	0.15	0.16	0.31	21.5957	69.6635
Post D1	8	0.11	0.08	0.19	26.5218	139.589			D2D8	8	0.1	0.11	0.21	18.5415	88.2927
Post D1	8	0.1	0.1	0.2	22.798	122.953			D2D8	8	0.12	0.1	0.22	23.2336	105.607
Post D1	9	0.11	0.15	0.26	18.7749	72.2112			D2D8	8	0.11	0.09	0.2	21.1018	105.509
Post D1	9	0.13	0.12	0.25	21.1593	84.6372			D2D8	8	0.12	0.1	0.22	20.1311	91.5052
Post D1	9	0.13	0.11	0.24	25.5872	106.613			D2D8	8	0.11	0.09	0.2	24.334	121.67
Post D1	9	0.11	0.11	0.22	23.7735	108.061			D2D8	8	0.1	0.08	0.18	19.884	110.467
Post D1	9	0.1	0.12	0.22	16.1755	73.5251			D2D8	13	0.1	0.13	0.23	23.3356	101.459
Post D1	9	0.11	0.1	0.21	24.1438	114.97			D2D8	13	0.12	0.11	0.23	24.9993	108.693
Post D1	9	0.12	0.09	0.21	25.9398	123.523			D2D8	13	0.12	0.15	0.27	21.6672	80.2489
Post D1	9	0.11	0.15	0.26	21.793	83.8191			D2D8	13	0.11	0.11	0.22	23.0877	104.944
Post D1	9	0.11	0.1	0.21	24.0108	114.337			D2D8	13	0.13	0.12	0.25	23.9566	95.8266
Post D1	9	0.12	0.11	0.23	23.7605	103.306			D2D8	13	0.13	0.12	0.25	20.211	80.844
Post D1	10	0.14	0.12	0.26	25.5178	98.1454			D2D8	13	0.12	0.11	0.23	23.8254	103.589
Post D1	10	0.13	0.25	0.38	18.0108	47.3969			D2D8	13	0.11	0.09	0.2	25.864	129.32
Post D1	10	0.12	0.19	0.31	18.0741	58.3036			D2D8	14	0.13	0.16	0.29	18.3249	63.1892
Post D1	10	0.11	0.11	0.22	23.5585	107.084			D2D8	14	0.14	0.16	0.3	20.9246	69.7487
Post D1	10	0.11	0.11	0.22	22.5899	102.681			D2D8	14	0.13	0.17	0.3	18.2011	60.6704
Post D1	10	0.11	0.12	0.23	22.939	109.234			D2D8	14	0.13	0.24	0.37	18.634	50.3621
Post D1	10	0.11	0.14	0.25	22.6867	90.747			D2D8	14	0.12	0.17	0.29	20.0655	69.1914
Post D1	10	0.12	0.1	0.22	23.4337	106.517			D2D8	14	0.12	0.21	0.33	10.8019	32.733
Post D1	10	0.12	0.1	0.22	25.4504	115.684			D2D8	14	0.14	0.21	0.35	17.7781	50.7946
Post D1	10	0.1	0.09	0.19	22.6071	118.985			D2D8	14	0.18	0.28	0.46	15.356	33.3827
Post D1	11	0.16	0.18	0.34	20.1365	59.225			D2D8	14	0.13	0.24	0.37	15.5564	42.0443
Post D1	11	0.17	0.16	0.33	22.5924	68.4617			D2D8	14	0.12	0.12	0.24	20.803	86.6791
Post D1	11	0.17	0.13	0.3	21.4371	71.457			D2D8	14	0.12	0.19	0.31	20.1473	64.9914
Post D1	11	0.19	0.19	0.38	19.3895	51.025			D2D8	14	0.15	0.16	0.31	19.5634	63.1079
Post D1	11	0.15	0.17	0.32	20.1382	62.9318			D2D8	14	0.1	0.14	0.24	18.015	75.0626
Post D1	11	0.15	0.17	0.32	20.79	64.9688			D2D8	14	0.11	0.16	0.27	20.1818	74.7474
Post D1	11	0.15	0.19	0.34	18.1398	53.3524			D2D8	17	0.12	0.14	0.26	21.5844	83.0169
Post D1	11	0.17	0.17	0.34	21.3707	62.855			D2D8	17	0.15	0.16	0.31	21.035	67.8549
Post D1	11	0.14	0.13	0.27	21.6871	80.3224			D2D8	17	0.12	0.18	0.3	19.4919	64.9729
Post D1	11	0.15	0.13	0.28	24.4046	87.1593			D2D8	17	0.13	0.16	0.29	19.8975	68.612
Post D1	12	0.12	0.07	0.19	26.5216	139.588			D2D8	17	0.15	0.17	0.32	20.1279	62.8996
Post D1	12	0.12	0.08	0.2	26.8498	134.249			D2D8	17	0.15	0.18	0.33	20.1906	61.1836
Post D1	12	0.13	0.13	0.26	25.802	99.2384			D2D8	17	0.13	0.15	0.28	19.945	71.2321
Post D1	12	0.14	0.1	0.24	24.9911	104.13			D2D8	17	0.15	0.16	0.31	21.4008	69.035
Post D1	12	0.13	0.1	0.23	27.1714	118.136			D2D8	17	0.14	0.15	0.29	21.1624	72.9739
Post D1	12	0.13	0.11	0.24	24.6686	102.786			D2D8	17	0.13	0.16	0.29	19.3902	66.8629
Post D1	12	0.14	0.1	0.24	25.948	108.117			D2D8	17	0.14	0.18	0.32	18.5495	57.9673
Post D1	12	0.13	0.11	0.24	27.4344	114.31			D2D8	18	0.13	0.16	0.29	23.5472	81.1974
Post D1	12	0.14	0.09	0.23	28.0963	122.158			D2D8	18	0.12	0.1	0.22	26.207	119.123
Post D1	12	0.12	0.08	0.2	27.3016	136.508			D2D8	18	0.13	0.1	0.23	25.5345	111.02
Post D1	13	0.12	0.11	0.23	24.7104	107.436			D2D8	18	0.15	0.12	0.27	24.4231	90.4561
Post D1	13	0.13	0.1	0.23	27.4916	119.528			D2D8	18	0.15	0.11	0.26	19.5234	75.0901
Post D1	13	0.12	0.12	0.24	21.0452	87.6885			D2D8	18	0.13	0.15	0.28	22.8666	81.6664
Post D1	13	0.14	0.16	0.3	23.0554	76.8514			D2D8	18	0.13	0.13	0.26	23.187	89.181
Post D1	13	0.11	0.13	0.24	22.0013	91.672			D2D8	18	0.13	0.12	0.25	21.9933	87.973
Post D1	13	0.12	0.1	0.22	23.7127	107.785			D2D13	5	0.15	0.23	0.38	16.5814	43.6353
Post D1	13	0.16	0.07	0.23	26.2211	114.005			D2D13	5	0.15	0.16	0.31	21.4811	69.2938
Post D1	13	0.13	0.1	0.23	24.8527	108.055			D2D13	5	0.14	0.25	0.39	17.4832	44.8287
Post D1	13	0.12	0.1	0.22	25.5944	116.338			D2D13	5	0.13	0.19	0.32	18.617	58.1782
Post D1	13	0.14	0.16	0.3	20.7159	69.0528			D2D13	5	0.15	0.09	0.24	23.5447	98.1028
Post D1	13	0.13	0.14	0.27	23.0493	85.3678			D2D13	5	0.12	0.13	0.25	14.7438	58.9751
Post D1	14	0.12	0.12	0.24	25.6097	106.707			D2D13	5	0.13	0.15	0.28	20.5135	73.2623
Post D1	14	0.17	0.17	0.34	21.2979	62.6409			D2D13	5	0.17	0.16	0.33	19.9004	60.3041
Post D1	14	0.15	0.15	0.3	20.7962	69.3208			D2D13	5	0.15	0.13	0.28	21.5407	76.9309
Post D1	14	0.13	0.13	0.26	22.2454	85.5593			D2D13	5	0.16	0.18	0.34	17.4228	51.2436
Post D1	14	0.13	0.15	0.28	20.7422	74.0792			D2D13	5	0.18	0.2	0.38	21.6619	57.0051
Post D1	14	0.13	0.18	0.31	18.4965	59.6662			D2D13	6	0.1	0.23	0.33	15.6089	47.2997
Post D1	14	0.18	0.19	0.37	19.5973	52.9656			D2D13	6	0.14	0.16	0.3	18.1088	60.3627
Post D1	14	0.14	0.14	0.28	23.0708	82.3957			D2D13	6	0.13	0.17	0.3	19.5115	65.0382
Post D1	14	0.14	0.16	0.3	23.8184	79.3948			D2D13	6	0.13	0.19	0.32	19.1006	59.6893
Post D1	14	0.12	0.14	0.26	20.5337	78.9756			D2D13	6	0.14	0.15	0.29	18.4755	63.7085
Post D1	15	0.12	0.14	0.26	22.7886	87.6483			D2D13	6	0.17	0.19	0.36	19.5296	54.2489
Post D1	15	0.12	0.15	0.27	19.2347	71.2397			D2D13	6	0.13	0.12	0.25	21.0706	84.2823
Post D1	15	0.17	0.18	0.35	19.1688	54.7679			D2D13	6	0.14	0.14	0.28	20.6695	73.8197
Post D1	15	0.12	0.13	0.25	21.4927	85.9709			D2D13	6	0.13	0.14	0.27	20.1282	74.5487
Post D1	15	0.14	0.14	0.28	21.0465	75.1659			D2D13	6	0.14	0.14	0.28	19.1487	68.3884
Post D1	15	0.15	0.15	0.3	21.947	73.1565			D2D13	6	0.13	0.11	0.24	22.6246	94.2693
Post D1	15	0.12	0.21	0.33	17.556	53.2001			D2D13	6	0.11	0.13	0.24	18.2925	76.2187
Post D1	15	0.14	0.11	0.25	22.5891	90.3565			D2D13	7	0.11	0.1	0.21	22.2769	106.081
Post D1	15	0.14	0.14	0.28	22.6071	80.7396			D2D13	7	0.14	0.11	0.25	24.004	96.0159
Post D1	15	0.15	0.26	0.41	17.2643	42.1079			D2D13	7	0.12	0.1	0.22	18.6663	84.8468
Post D1	15	0.14	0.14	0.28	19.999	71.4251			D2D13	7	0.13	0.09	0.22	26.314	119.609
Post D1	16	0.14	0.22	0.36	16.6652	46.2923			D2D13	7	0.1	0.11	0.21	13.6282	64.8961
Post D1	16	0.11	0.22	0.33	16.7872	50.8704			D2D13	7	0.13	0.11	0.24	23.1354	96.3973
Post D1	16	0.12	0.19	0.31	18.4389	59.4803			D2D13	7	0.11	0.1	0.21	23.2984	110.945
Post D1	16	0.11	0.18	0.29	16.7277	57.6816			D2D13	7	0.15	0.1	0.25	17.9573	71.8291
Post D1	16	0.15	0.16	0.31	20.5334	66.2367			D2D13	7	0.12	0.09	0.21	27.8971	132.844
Post D1	16	0.15	0.14	0.29	21.5776	74.4055			D2D13	7	0.1	0.08	0.18	22.5965	125.536
Post D1	16	0.13	0.16	0.29	20.0765	69.2293			D2D13	8	0.13	0.11	0.24	21.6529	90.2202
Post D1	16	0.12	0.08	0.2	26.2131	131.066			D2D13	8	0.12	0.11	0.23	21.4281	93.1658
Post D1	16	0.13	0.19	0.32	19.9525	62.3514			D2D13	8	0.12	0.1	0.22	21.7169	98.713
Post D1	16	0.14	0.18	0.32	20.2082	63.1507			D2D13	8	0.12	0.08	0.2	26.853	134.265
Post D1	16	0.13	0.14	0.27	20.6257	76.3916			D2D13	8	0.1	0.06	0.16	26.9385	168.366
Post D1	16	0.18	0.16	0.34	18.4347	54.2198			D2D13	8	0.13	0.12	0.25	19.5908	78.3633
Post D1	17	0.15	0.21	0.36	20.9573	58.2147			D2D13	8	0.14	0.1	0.24	27.183	113.262
Post D1	17	0.14	0.19	0.33	19.0325	57.6744			D2D13	8	0.1	0.09	0.19	23.2637	122.441
Post D1	17	0.14	0.16	0.3	23.0612	76.8706			D2D13	8	0.1	0.07	0.17	27.9201	164.236
Post D1	17	0.15	0.16	0.31	21.7888	70.2865			D2D13	8	0.11	0.09	0.2	28.3172	141.586
Post D1	17	0.12	0.15	0.27	22.8847	84.758			D2D13	13	0.11	0.09	0.2	24.8207	124.104
Post D1	17	0.15	0.12	0.27	25.1072	92.9898			D2D13	13	0.09	0.08	0.17	22.3891	131.7
Post D1	17	0.16	0.26	0.42	20.7066	49.3014			D2D13	13	0.11	0.12	0.23	24.6391	107.127
Post D1	17	0.13	0.19	0.32	20.5728	64.2901			D2D13	13	0.14	0.1	0.24	25.2571	105.238
Post D1	17	0.12	0.18	0.3	22.0978	73.6595			D2D13	13	0.1	0.09	0.19	23.9644	126.128
Post D1	17	0.13	0.14	0.27	21.6674	80.2498			D2D13	13	0.11	0.12	0.23	21.0536	91.5373
Post D1	17	0.13	0.15	0.28	21.4698	76.678			D2D13	13	0.14	0.12	0.26	23.358	89.8386
Post D1	17	0.14	0.17	0.31	23.7891	76.739			D2D13	13	0.1	0.07	0.17	29.1335	171.374
Post D1	18	0.11	0.11	0.22	24.3903	110.865			D2D13	13	0.12	0.1	0.22	24.1702	109.865
Post D1	18	0.1	0.16	0.26	19.1849	73.7879			D2D13	13	0.12	0.11	0.23	24.6713	107.267
Post D1	18	0.12	0.13	0.25	22.0411	88.1645			D2D13	14	0.14	0.26	0.4	16.2108	40.527
Post D1	18	0.12	0.12	0.24	26.2257	109.274			D2D13	14	0.16	0.22	0.38	17.5065	46.0698
Post D1	18	0.11	0.12	0.23	23.8838	103.842			D2D13	14	0.14	0.19	0.33	19.1503	58.0311
Post D1	18	0.13	0.1	0.23	26.0948	113.456			D2D13	14	0.14	0.15	0.29	21.1503	72.9321
Post D1	18	0.13	0.11	0.24	25.3414	105.589			D2D13	14	0.12	0.1	0.22	21.4537	97.5168
Post D1	18	0.12	0.1	0.22	22.611	102.777			D2D13	14	0.13	0.11	0.24	20.2308	84.2949
Post D1	18	0.13	0.16	0.29	23.2915	80.3155			D2D13	14	0.14	0.13	0.27	22.5601	83.556
Post D1	18	0.11	0.17	0.28	17.668	63.1001			D2D13	14	0.13	0.11	0.24	21.03	87.6251
Post D1	18	0.14	0.15	0.29	23.1707	79.8989			D2D13	14	0.14	0.14	0.28	21.408	76.4571
Post D1	19	0.1	0.18	0.28	17.6164	62.9159			D2D13	14	0.13	0.13	0.26	19.932	76.6614
Post D1	19	0.16	0.14	0.3	17.2922	57.6406			D2D13	14	0.15	0.22	0.37	14.9417	40.3831
Post D1	19	0.11	0.17	0.28	21.8819	78.1498			D2D13	14	0.14	0.12	0.26	22.1948	85.3648
Post D1	19	0.11	0.09	0.2	24.03	120.15			D2D13	14	0.13	0.13	0.26	17.6121	67.7389
Post D1	19	0.11	0.11	0.22	24.2262	110.119			D2D13	17	0.13	0.14	0.27	21.4849	79.5735
Post D1	19	0.11	0.11	0.22	23.8327	108.331			D2D13	17	0.11	0.14	0.25	15.6661	62.6644
Post D1	19	0.11	0.09	0.2	27.2211	136.105			D2D13	17	0.12	0.18	0.3	19.572	65.2399
Post D1	19	0.11	0.07	0.18	27.9293	155.163			D2D13	17	0.12	0.11	0.23	23.1717	100.747
Post D1	19	0.15	0.14	0.29	24.0246	82.8435			D2D13	17	0.12	0.11	0.23	23.3517	101.529
Post D1	19	0.12	0.08	0.2	27.7965	138.982			D2D13	17	0.13	0.13	0.26	21.6646	83.3252
Post D1	20	0.11	0.13	0.24	20.1321	83.8837			D2D13	17	0.15	0.12	0.27	23.4392	86.8117
Post D1	20	0.12	0.12	0.24	23.1005	96.2523			D2D13	17	0.14	0.17	0.31	19.9363	64.3108
Post D1	20	0.15	0.4	0.55	14.4072	26.195			D2D13	17	0.11	0.1	0.21	23.7811	113.243
Post D1	20	0.14	0.31	0.45	16.0965	35.7701			D2D13	18	0.13	0.09	0.22	28.0184	127.357
Post D1	20	0.15	0.23	0.38	18.0253	47.4349			D2D13	18	0.11	0.09	0.2	28.945	144.725
Post D1	20	0.12	0.13	0.25	23.8889	95.5558			D2D13	18	0.11	0.09	0.2	26.6614	133.307
Post D1	20	0.15	0.17	0.32	20.3104	63.4701			D2D13	18	0.12	0.12	0.24	21.9083	91.2847
Post D1	20	0.16	0.17	0.33	20.8337	63.1324			D2D13	18	0.15	0.16	0.31	22.6615	73.1016
Post D1	20	0.14	0.12	0.26	22.065	84.8653			D2D13	18	0.12	0.17	0.29	22.0911	76.1762
Post D1	20	0.12	0.12	0.24	22.7216	94.6733			D2D13	18	0.13	0.11	0.24	24.9447	103.936
Post D1	20	0.12	0.14	0.26	21.8746	84.1331			D2D13	18	0.13	0.13	0.26	23.423	90.0885
Post D1	20	0.13	0.15	0.28	23.5214	84.0049			D2D13	18	0.14	0.09	0.23	26.4048	114.804
PD2	5	0.19	0.18	0.37	22.5634	60.982			D2D13	18	0.14	0.1	0.24	26.5643	110.685
PD2	5	0.15	0.28	0.43	11.8582	27.5773
PD2	5	0.16	0.26	0.42	20.075	47.7977
PD2	5	0.12	0.32	0.44	13.9827	31.7788
PD2	5	0.14	0.17	0.31	21.9217	70.7151
PD2	5	0.15	0.15	0.3	22.053	73.5102
PD2	5	0.1	0.15	0.25	18.5284	74.1135
PD2	5	0.17	0.25	0.42	19.8935	47.3655
PD2	5	0.16	0.16	0.32	21.5415	67.3173
PD2	6	0.14	0.14	0.28	22.9435	81.9409
PD2	6	0.14	0.17	0.31	21.9192	70.7072
PD2	6	0.13	0.15	0.28	23.0117	82.1848
PD2	6	0.1	0.09	0.19	23.4731	123.542
PD2	6	0.11	0.08	0.19	23.8633	125.596
PD2	6	0.12	0.13	0.25	21.1681	84.6723
PD2	6	0.12	0.13	0.25	22.1553	88.6211
PD2	6	0.12	0.11	0.23	23.4161	101.809
PD2	6	0.12	0.14	0.26	21.1682	81.4161
PD2	6	0.14	0.14	0.28	22.614	80.7644
PD2	7	0.11	0.12	0.23	23.9015	103.919
PD2	7	0.13	0.1	0.23	24.9217	108.355
PD2	7	0.13	0.1	0.23	23.258	101.122
PD2	7	0.12	0.1	0.22	24.2772	110.351
PD2	7	0.13	0.12	0.25	23.3808	93.523
PD2	7	0.12	0.15	0.27	20.9468	77.5806
PD2	7	0.14	0.14	0.28	20.1139	71.8354
PD2	7	0.13	0.17	0.3	19.4746	64.9155
PD2	7	0.14	0.19	0.33	16.591	50.2758
PD2	8	0.13	0.12	0.25	22.7195	90.8781
PD2	8	0.15	0.18	0.33	22.6289	68.5723
PD2	8	0.18	0.17	0.35	21.6674	61.9069
PD2	8	0.16	0.23	0.39	14.5896	37.4093
PD2	8	0.13	0.3	0.43	13.9431	32.4257
PD2	8	0.17	0.19	0.36	18.8467	52.352
PD2	8	0.16	0.28	0.44	17.8918	40.6631
PD2	8	0.1	0.11	0.21	25.0854	119.454
PD2	8	0.13	0.14	0.27	24.2111	89.6707
PD2	8	0.14	0.11	0.25	20.4596	81.8384
PD2	8	0.13	0.26	0.39	17.2184	44.1498
PD2	8	0.14	0.18	0.32	19.9554	62.3607
PD2	8	0.17	0.19	0.36	19.5044	54.1788
PD2	13	0.12	0.23	0.35	18.4473	52.7066
PD2	13	0.15	0.12	0.27	28.2535	104.643
PD2	13	0.13	0.15	0.28	22.9807	82.074
PD2	13	0.13	0.16	0.29	21.4997	74.1368
PD2	13	0.16	0.17	0.33	23.6218	71.5811
PD2	13	0.14	0.18	0.32	19.2951	60.2971
PD2	13	0.14	0.24	0.38	20.104	52.9054
PD2	13	0.11	0.16	0.27	21.8945	81.0907
PD2	13	0.14	0.12	0.26	25.4406	97.8484
PD2	13	0.11	0.08	0.19	26.729	140.679
PD2	13	0.1	0.08	0.18	25.8922	143.846
PD2	14	0.12	0.21	0.33	17.8305	54.0318
PD2	14	0.09	0.41	0.5	16.1374	32.2748
PD2	14	0.13	0.18	0.31	19.5464	63.0527
PD2	14	0.15	0.24	0.39	20.619	52.8694
PD2	14	0.12	0.17	0.29	19.9247	68.706
PD2	14	0.13	0.34	0.47	15.3017	32.5569
PD2	14	0.17	0.29	0.46	20.2306	43.9795
PD2	14	0.14	0.18	0.32	21.3245	66.6392
PD2	14	0.15	0.19	0.34	21.8955	64.3985
PD2	17	0.12	0.3	0.42	13.6707	32.5493
PD2	17	0.15	0.3	0.45	15.9852	35.5227
PD2	17	0.14	0.27	0.41	16.737	40.822
PD2	17	0.14	0.16	0.3	22.0501	73.5002
PD2	17	0.15	0.15	0.3	21.0246	70.0819
PD2	17	0.12	0.19	0.31	18.9089	60.9965
PD2	17	0.15	0.15	0.3	21.9897	73.2989
PD2	17	0.13	0.16	0.29	21.5365	74.2638
PD2	17	0.16	0.16	0.32	21.2169	66.3029
PD2	17	0.14	0.17	0.31	20.383	65.7517
PD2	17	0.14	0.19	0.33	20.4505	61.9711
PD2	17	0.14	0.15	0.29	21.6648	74.7064
PD2	17	0.14	0.13	0.27	20.649	76.4779
PD2	18	0.14	0.17	0.31	24.6478	79.5091
PD2	18	0.12	0.22	0.34	20.3646	59.8958
PD2	18	0.14	0.14	0.28	24.1393	86.2119
PD2	18	0.12	0.11	0.23	26.826	116.635
PD2	18	0.1	0.09	0.19	14.919	78.5208
PD2	18	0.12	0.11	0.23	24.7514	107.615
PD2	18	0.13	0.2	0.33	22.2898	67.5448
PD2	18	0.12	0.14	0.26	19.4825	74.9327

## Sheet: Pre-Inj Sylgard
Time point	Animal ID	Swing Time	Stance Time	Stride Time	Stride Distance	Speed			Time point	Animal ID	Swing Time	Stance Time	Stride Time	Stride Distance	Speed
BL	2	0.14	0.14	0.28	17.428	62.244			D1D5	2	0.13	0.1	0.23	23.29	101.259
BL	2	0.17	0.16	0.33	17.173	52.0394			D1D5	2	0.15	0.07	0.22	29.7501	135.228
BL	2	0.11	0.08	0.19	21.7513	114.481			D1D5	2	0.14	0.08	0.22	26.1649	118.931
BL	2	0.14	0.08	0.22	24.6473	112.033			D1D5	2	0.14	0.08	0.22	23.5368	106.986
BL	2	0.13	0.11	0.24	23.0713	96.1305			D1D5	2	0.17	0.1	0.27	22.55	83.5185
BL	2	0.13	0.1	0.23	22.5477	98.0335			D1D5	2	0.18	0.11	0.29	22.0499	76.0342
BL	2	0.16	0.11	0.27	23.3243	86.3864			D1D5	2	0.16	0.1	0.26	20.4419	78.6228
BL	2	0.17	0.13	0.3	18.6372	62.1239			D1D5	2	0.1	0.1	0.2	24.7657	123.828
BL	2	0.13	0.11	0.24	22.6602	94.4175			D1D5	3	0.16	0.09	0.25	25.5945	102.378
BL	2	0.14	0.1	0.24	22.3825	93.2602			D1D5	3	0.14	0.09	0.23	22.1663	96.3753
BL	3	0.15	0.13	0.28	19.6642	70.2291			D1D5	3	0.16	0.12	0.28	20.0967	71.7738
BL	3	0.16	0.13	0.29	17.78	61.3104			D1D5	3	0.14	0.11	0.25	19.4186	77.6744
BL	3	0.13	0.13	0.26	19.0066	73.1024			D1D5	3	0.15	0.09	0.24	21.8732	91.1382
BL	3	0.14	0.13	0.27	20.9172	77.471			D1D5	3	0.13	0.12	0.25	17.6449	70.5796
BL	3	0.14	0.12	0.26	19.5418	75.161			D1D5	3	0.14	0.07	0.21	22.4435	106.874
BL	3	0.14	0.11	0.25	20.2102	80.8407			D1D5	3	0.16	0.1	0.26	19.5944	75.3631
BL	3	0.15	0.1	0.25	21.8537	87.4148			D1D5	3	0.11	0.08	0.19	21.3309	112.268
BL	3	0.14	0.1	0.24	20.7638	86.5158			D1D5	3	0.14	0.09	0.23	19.471	84.6565
BL	3	0.17	0.09	0.26	20.5135	78.8981			D1D5	4	0.15	0.09	0.24	25.077	104.487
BL	4	0.15	0.15	0.3	17.4208	58.0692			D1D5	4	0.15	0.13	0.28	22.0679	78.8141
BL	4	0.17	0.14	0.31	17.1755	55.4047			D1D5	4	0.17	0.12	0.29	23.4705	80.9326
BL	4	0.19	0.27	0.46	12.6863	27.5789			D1D5	4	0.14	0.11	0.25	21.3446	85.3784
BL	4	0.15	0.2	0.35	16.0801	45.9433			D1D5	4	0.14	0.11	0.25	19.094	76.376
BL	4	0.13	0.2	0.33	15.6277	47.3566			D1D5	4	0.15	0.11	0.26	23.9735	92.2056
BL	4	0.19	0.24	0.43	20.3162	59.7534			D1D5	4	0.12	0.09	0.21	23.7859	113.266
BL	4	0.16	0.15	0.31	16.913	54.558			D1D5	4	0.13	0.13	0.26	17.2567	66.3718
BL	4	0.16	0.16	0.32	16.3706	51.1581			D1D5	4	0.18	0.17	0.35	19.8755	56.7871
BL	4	0.16	0.19	0.35	17.7666	50.7618			D1D5	5	0.16	0.1	0.26	22.3111	85.8119
BL	4	0.15	0.15	0.3	16.4889	54.963			D1D5	5	0.14	0.09	0.23	21.5869	93.8561
BL	4	0.17	0.17	0.34	17.3412	51.0035			D1D5	5	0.14	0.11	0.25	21.203	84.8119
BL	4	0.19	0.18	0.37	16.193	43.7648			D1D5	5	0.13	0.07	0.2	25.0955	125.477
BL	4	0.16	0.16	0.32	15.6773	48.9914			D1D5	5	0.14	0.08	0.22	22.4281	101.946
BL	4	0.16	0.14	0.3	19.5835	65.2783			D1D5	5	0.16	0.07	0.23	25.33	110.131
BL	5	0.17	0.14	0.31	17.6809	57.0351			D1D5	5	0.14	0.08	0.22	24.3811	110.823
BL	5	0.16	0.16	0.32	16.7601	52.3755			D1D5	5	0.17	0.1	0.27	25.3423	93.8603
BL	5	0.19	0.26	0.45	15.0227	33.3837			D1D5	6	0.13	0.08	0.21	23.4679	111.752
BL	5	0.13	0.2	0.33	14.2398	43.1508			D1D5	6	0.13	0.08	0.21	22.4134	106.731
BL	5	0.16	0.18	0.34	19.0045	55.8956			D1D5	6	0.15	0.23	0.38	16.7247	44.0123
BL	5	0.17	0.19	0.36	14.2946	39.7073			D1D5	6	0.16	0.13	0.29	20.2276	69.7504
BL	5	0.16	0.15	0.31	17.5885	56.7371			D1D5	6	0.14	0.08	0.22	22.5343	102.428
BL	5	0.16	0.14	0.3	18.1472	60.4906			D1D5	6	0.16	0.1	0.26	22.661	87.1576
BL	5	0.15	0.1	0.25	19.6898	78.7592			D1D5	6	0.14	0.13	0.27	16.381	60.6703
BL	5	0.16	0.09	0.25	20.4387	81.7546			D1D5	6	0.14	0.2	0.34	10.8607	31.9433
BL	6	0.18	0.1	0.28	24.4785	87.4234			D1D5	6	0.13	0.08	0.21	22.3553	106.454
BL	6	0.15	0.11	0.26	19.6865	75.7173			D1D5	6	0.15	0.09	0.24	25.0276	104.282
BL	6	0.16	0.13	0.29	21.1641	72.9796			D1D5	7	0.13	0.07	0.2	24.5531	122.766
BL	6	0.16	0.09	0.25	20.4594	81.8378			D1D5	7	0.14	0.08	0.22	22.9614	104.37
BL	6	0.14	0.1	0.24	20.4892	85.3716			D1D5	7	0.16	0.08	0.24	23.8709	99.4621
BL	6	0.15	0.11	0.26	20.0642	77.1701			D1D5	7	0.15	0.1	0.25	22.586	90.3441
BL	6	0.17	0.21	0.38	17.8658	47.0153			D1D5	7	0.15	0.09	0.24	22.5262	93.8593
BL	6	0.16	0.12	0.28	22.0761	78.8433			D1D5	7	0.14	0.08	0.22	23.9785	108.993
BL	7	0.16	0.11	0.27	21.2265	78.6168			D1D5	7	0.13	0.07	0.2	21.3983	106.991
BL	7	0.15	0.11	0.26	20.7983	79.9935			D1D5	7	0.14	0.09	0.23	21.9521	95.4441
BL	7	0.11	0.1	0.21	22.9941	109.496			D1D5	8	0.14	0.08	0.22	21.2144	96.4291
BL	7	0.11	0.09	0.2	23.2664	116.332			D1D5	8	0.16	0.08	0.24	23.5377	98.0738
BL	7	0.16	0.08	0.24	24.1554	100.648			D1D5	8	0.14	0.09	0.23	22.2212	96.614
BL	7	0.16	0.13	0.29	16.3138	56.2543			D1D5	8	0.15	0.1	0.25	21.47	85.8798
BL	7	0.14	0.17	0.31	13.7017	44.1989			D1D5	8	0.15	0.09	0.24	21.5145	89.6437
BL	7	0.14	0.18	0.32	12.4945	39.0453			D1D5	8	0.14	0.1	0.24	21.074	87.8083
BL	7	0.13	0.09	0.22	22.6665	103.03			D1D5	8	0.15	0.09	0.24	19.123	79.6793
BL	7	0.12	0.09	0.21	21.7751	103.691			D1D5	8	0.17	0.11	0.28	20.2635	72.3695
BL	7	0.14	0.09	0.23	18.3966	79.9854			D1D5	9	0.14	0.08	0.22	24.3142	110.519
BL	7	0.13	0.09	0.22	18.6838	84.9263			D1D5	9	0.17	0.09	0.26	23.4705	90.2713
BL	8	0.12	0.11	0.23	21.0349	91.4559			D1D5	9	0.13	0.08	0.21	22.0516	105.008
BL	8	0.11	0.1	0.21	20.5081	97.6578			D1D5	9	0.13	0.08	0.21	23.8486	113.565
BL	8	0.16	0.15	0.31	17.0397	54.9667			D1D5	9	0.14	0.09	0.23	24.6209	107.047
BL	8	0.17	0.15	0.32	18.0537	56.4179			D1D5	9	0.16	0.19	0.35	20.393	58.2657
BL	8	0.15	0.13	0.28	18.3319	65.4712			D1D5	9	0.14	0.11	0.25	20.5155	82.0619
BL	8	0.17	0.14	0.31	18.9556	61.147			D1D5	9	0.16	0.09	0.25	24.5516	98.2066
BL	8	0.16	0.18	0.34	15.0041	44.1298			D1D5	9	0.16	0.09	0.25	22.8892	91.5567
BL	8	0.17	0.16	0.33	18.1087	54.8747			D1D5	10	0.13	0.09	0.22	19.4181	88.2643
BL	8	0.15	0.11	0.26	19.2676	74.1062			D1D5	10	0.13	0.09	0.22	19.934	90.609
BL	8	0.15	0.14	0.29	18.4604	63.6564			D1D5	10	0.13	0.1	0.23	18.9648	82.4556
BL	8	0.15	0.11	0.26	20.5777	79.1449			D1D5	10	0.13	0.12	0.25	19.5622	78.249
BL	8	0.16	0.11	0.27	20.0605	74.2982			D1D5	10	0.17	0.11	0.28	15.6288	55.8171
BL	8	0.18	0.11	0.29	19.2602	66.4146			D1D5	10	0.12	0.23	0.35	14.3342	40.9549
BL	9	0.18	0.17	0.35	18.5814	53.0896			D1D5	10	0.15	0.1	0.25	19.9981	79.9926
BL	9	0.19	0.15	0.34	18.4784	54.3484			D1D5	10	0.15	0.1	0.25	19.3504	77.4018
BL	9	0.14	0.08	0.22	22.7085	103.221			D1D5	10	0.13	0.13	0.26	17.8062	68.4852
BL	9	0.16	0.07	0.23	23.9728	104.23			D1D5	10	0.15	0.13	0.28	18.4992	66.0686
BL	9	0.15	0.08	0.23	21.79	94.7391			D1D5	10	0.16	0.11	0.27	18.8414	69.7831
BL	9	0.13	0.11	0.24	19.82	82.5833			D1D5	11	0.18	0.13	0.31	21.1082	68.091
BL	9	0.16	0.09	0.25	19.9701	79.8803			D1D5	11	0.17	0.12	0.29	22.8369	78.7481
BL	9	0.15	0.1	0.25	20.4673	81.8691			D1D5	11	0.19	0.18	0.37	18.6379	50.3727
BL	10	0.14	0.1	0.24	19.9145	82.977			D1D5	11	0.21	0.16	0.37	18.6388	50.375
BL	10	0.15	0.09	0.24	23.2788	96.9949			D1D5	11	0.19	0.15	0.34	20.7288	60.9669
BL	10	0.15	0.12	0.27	20.0016	74.0801			D1D5	11	0.2	0.11	0.31	19.4778	62.8315
BL	10	0.16	0.11	0.27	19.2238	71.1993			D1D5	11	0.2	0.13	0.33	21.7157	65.8051
BL	10	0.15	0.1	0.25	19.4243	77.6972			D1D5	11	0.16	0.13	0.29	18.9557	65.3646
BL	10	0.14	0.1	0.24	18.1012	75.4216			D1D5	11	0.18	0.14	0.32	18.8983	59.0572
BL	10	0.15	0.11	0.26	19.0714	73.3516			D1D5	11	0.19	0.16	0.35	18.3835	52.5243
BL	10	0.13	0.11	0.24	15.6043	65.0178			D1D5	12	0.14	0.07	0.21	26.1937	124.732
BL	10	0.13	0.1	0.23	18.9511	82.396			D1D5	12	0.16	0.08	0.24	25.2967	105.403
BL	10	0.15	0.12	0.27	17.6627	65.4175			D1D5	12	0.16	0.08	0.24	24.661	102.754
BL	10	0.12	0.14	0.26	15.4859	59.5613			D1D5	12	0.15	0.08	0.23	25.6272	111.423
BL	11	0.15	0.11	0.26	18.153	69.8191			D1D5	12	0.14	0.09	0.23	25.364	110.278
BL	11	0.15	0.09	0.24	17.09	71.2084			D1D5	12	0.14	0.1	0.24	22.8551	95.2298
BL	11	0.16	0.27	0.43	13.7795	32.0454			D1D5	12	0.14	0.09	0.23	23.4328	101.882
BL	11	0.19	0.19	0.38	16.768	44.1262			D1D5	12	0.12	0.14	0.26	17.418	66.9923
BL	11	0.17	0.14	0.31	16.2792	52.5134			D1D5	13	0.13	0.06	0.19	26.0416	137.061
BL	11	0.21	0.17	0.38	18.1893	47.8666			D1D5	13	0.14	0.1	0.24	23.9087	99.6195
BL	11	0.19	0.15	0.34	15.8535	46.6279			D1D5	13	0.16	0.11	0.27	24.5499	90.9255
BL	11	0.19	0.16	0.35	19.0277	54.3647			D1D5	13	0.13	0.09	0.22	25.1316	114.235
BL	11	0.16	0.13	0.29	17.4429	60.1478			D1D5	13	0.11	0.08	0.19	24.622	129.59
BL	11	0.18	0.11	0.29	18.6579	64.3377			D1D5	13	0.15	0.1	0.25	25.7702	103.081
BL	11	0.15	0.11	0.26	15.8253	60.8665			D1D5	13	0.13	0.09	0.22	24.3693	110.77
BL	11	0.18	0.1	0.28	19.651	70.1823			D1D5	13	0.13	0.09	0.22	25.4676	115.762
BL	12	0.18	0.18	0.36	17.9967	49.9907			D1D5	14	0.15	0.12	0.27	25.0874	92.9165
BL	12	0.19	0.17	0.36	17.9304	49.8068			D1D5	14	0.13	0.08	0.21	25.5873	121.844
BL	12	0.15	0.15	0.3	19.1413	63.8045			D1D5	14	0.13	0.1	0.23	24.6306	107.089
BL	12	0.15	0.13	0.28	19.3928	69.2601			D1D5	14	0.15	0.09	0.24	21.8956	91.2315
BL	12	0.15	0.11	0.26	22.929	88.1886			D1D5	14	0.12	0.09	0.21	21.0547	100.26
BL	12	0.14	0.1	0.24	18.6526	77.7192			D1D5	14	0.12	0.09	0.21	20.2057	96.2178
BL	12	0.13	0.12	0.25	22.6717	90.6869			D1D5	14	0.14	0.09	0.23	26.4057	114.807
BL	12	0.16	0.1	0.26	21.7037	83.4758			D1D5	14	0.16	0.1	0.26	24.5362	94.3699
BL	12	0.15	0.12	0.27	19.9416	73.8578			D1D5	14	0.14	0.11	0.25	21.7494	86.9976
BL	12	0.15	0.09	0.24	21.8578	91.0743			D1D5	14	0.15	0.13	0.28	21.3722	76.3292
BL	12	0.12	0.18	0.3	16.8535	56.1784			D1D5	15	0.17	0.11	0.28	22.6626	80.9378
BL	12	0.13	0.12	0.25	21.2824	85.1298			D1D5	15	0.18	0.14	0.32	22.4148	70.0463
BL	13	0.14	0.1	0.24	20.7439	86.4329			D1D5	15	0.15	0.09	0.24	22.298	92.9083
BL	13	0.16	0.09	0.25	20.3097	81.2388			D1D5	15	0.18	0.11	0.29	22.7192	78.3422
BL	13	0.15	0.12	0.27	17.4591	64.6632			D1D5	15	0.17	0.12	0.29	21.1232	72.8387
BL	13	0.14	0.13	0.27	18.6085	68.9205			D1D5	15	0.17	0.13	0.3	21.1858	70.6193
BL	13	0.14	0.11	0.25	22.5487	90.1948			D1D5	15	0.17	0.17	0.34	18.4504	54.266
BL	13	0.12	0.11	0.23	23.6623	102.879			D1D5	15	0.17	0.24	0.41	17.5266	42.7477
BL	13	0.11	0.1	0.21	22.2534	105.968			D1D5	15	0.17	0.15	0.32	17.0974	53.4294
BL	13	0.14	0.09	0.23	20.9136	90.9288			D1D5	15	0.18	0.16	0.34	17.7875	52.3162
BL	13	0.13	0.09	0.22	20.8509	94.7767			D1D5	15	0.17	0.14	0.31	17.0768	55.0866
BL	14	0.15	0.09	0.24	21.8327	90.9694			D1D5	16	0.16	0.08	0.24	23.8348	99.3116
BL	14	0.13	0.1	0.23	20.6704	89.8714			D1D5	16	0.12	0.08	0.2	22.8299	114.15
BL	14	0.15	0.17	0.32	16.4858	51.5182			D1D5	16	0.14	0.09	0.23	24.3039	105.669
BL	14	0.15	0.14	0.29	19.019	65.5827			D1D5	16	0.15	0.1	0.25	23.5803	94.321
BL	14	0.16	0.14	0.3	20.0145	66.715			D1D5	16	0.15	0.1	0.25	22.6334	90.5335
BL	14	0.15	0.16	0.31	18.1505	58.5499			D1D5	16	0.15	0.09	0.24	21.3074	88.781
BL	14	0.16	0.12	0.28	20.864	74.5144			D1D5	16	0.14	0.1	0.24	24.8496	103.54
BL	14	0.18	0.13	0.31	21.0629	67.9449			D1D5	16	0.16	0.1	0.26	24.6604	94.8478
BL	14	0.16	0.11	0.27	18.6455	69.0575			D1D5	16	0.14	0.06	0.2	23.1676	115.838
BL	15	0.17	0.11	0.28	21.6256	77.2344			D1D5	16	0.13	0.08	0.21	20.8546	99.3074
BL	15	0.14	0.14	0.28	16.2955	58.1983			D1D5	17	0.19	0.19	0.38	18.9536	49.8778
BL	15	0.16	0.17	0.33	17.1293	51.9069			D1D5	17	0.23	0.16	0.39	20.1932	51.7775
BL	15	0.18	0.15	0.33	17.4453	52.8646			D1D5	17	0.2	0.17	0.37	21.4781	58.0491
BL	15	0.17	0.12	0.29	19.5969	67.5755			D1D5	17	0.18	0.16	0.34	19.0231	55.9504
BL	15	0.16	0.17	0.33	19.5635	59.2834			D1D5	17	0.22	0.17	0.39	21.2837	54.5735
BL	15	0.17	0.12	0.29	19.3799	66.8273			D1D5	17	0.17	0.16	0.33	20.0288	60.6933
BL	15	0.18	0.15	0.33	18.9427	57.4021			D1D5	17	0.21	0.16	0.37	20.5415	55.5177
BL	15	0.14	0.17	0.31	15.4349	49.79			D1D5	17	0.18	0.13	0.31	23.8918	77.0704
BL	15	0.15	0.11	0.26	19.1301	73.5771			D1D5	17	0.18	0.17	0.35	19.6632	56.1805
BL	16	0.17	0.16	0.33	17.8747	54.1656			D1D5	17	0.23	0.21	0.44	19.1474	43.5168
BL	16	0.16	0.16	0.32	16.9381	52.9316			D1D5	18	0.16	0.08	0.24	28.8913	120.38
BL	16	0.15	0.1	0.25	20.791	83.1639			D1D5	18	0.16	0.08	0.24	26.9286	112.202
BL	16	0.16	0.1	0.26	22.3153	85.8281			D1D5	18	0.17	0.1	0.27	26.6306	98.6317
BL	16	0.17	0.08	0.25	21.2788	85.1152			D1D5	18	0.14	0.1	0.24	27.0751	112.813
BL	16	0.17	0.13	0.3	17.3767	57.9222			D1D5	18	0.12	0.11	0.23	22.959	99.8216
BL	16	0.14	0.11	0.25	19.0839	76.3355			D1D5	18	0.14	0.1	0.24	22.5314	93.881
BL	16	0.16	0.11	0.27	19.5106	72.2615			D1D5	18	0.15	0.16	0.31	20.9727	67.6537
BL	17	0.17	0.1	0.27	22.2543	82.4234			D1D5	18	0.1	0.16	0.26	16.6787	64.1487
BL	17	0.15	0.11	0.26	22.986	88.4077			D1D5	18	0.17	0.1	0.27	26.3918	97.7475
BL	17	0.18	0.22	0.4	16.0257	40.0643			D1D5	18	0.16	0.13	0.29	23.2084	80.0291
BL	17	0.18	0.23	0.41	15.4273	37.6274			D1D5	19	0.13	0.11	0.24	21.5464	89.7767
BL	17	0.17	0.17	0.34	17.5903	51.7363			D1D5	19	0.14	0.13	0.27	23.1114	85.5977
BL	17	0.17	0.17	0.34	19.4688	57.2612			D1D5	19	0.17	0.21	0.38	15.0865	39.7013
BL	17	0.19	0.21	0.4	16.1445	40.3613			D1D5	19	0.15	0.25	0.4	16.1941	40.4852
BL	17	0.18	0.19	0.37	17.2342	46.5788			D1D5	19	0.09	0.09	0.18	19.1117	106.176
BL	17	0.17	0.15	0.32	18.9773	59.3041			D1D5	19	0.13	0.1	0.23	21.4673	93.3359
BL	17	0.17	0.14	0.31	18.4371	59.4745			D1D5	19	0.12	0.07	0.19	22.8272	120.143
BL	18	0.16	0.13	0.29	18.7974	64.8187			D1D5	19	0.14	0.08	0.22	22.5649	102.568
BL	18	0.14	0.13	0.27	17.4708	64.7065			D1D5	19	0.14	0.09	0.23	24.8574	108.076
BL	18	0.16	0.2	0.36	15.5386	43.1627			D1D5	19	0.14	0.1	0.24	22.2704	92.7934
BL	18	0.17	0.25	0.42	15.1162	35.9909			D1D5	20	0.16	0.15	0.31	19.3075	62.2823
BL	18	0.19	0.18	0.37	17.5258	47.3671			D1D5	20	0.18	0.16	0.34	21.0461	61.9003
BL	18	0.16	0.19	0.35	19.2127	54.8934			D1D5	20	0.16	0.15	0.31	19.8851	64.1454
BL	18	0.16	0.1	0.26	21.3833	82.2435			D1D5	20	0.14	0.12	0.26	20.5402	79.0008
BL	18	0.15	0.12	0.27	21.8038	80.7546			D1D5	20	0.15	0.15	0.3	21.1106	70.3687
BL	18	0.19	0.12	0.31	19.5278	62.993			D1D5	20	0.15	0.16	0.31	17.6966	57.0858
BL	18	0.15	0.13	0.28	20.7189	73.9961			D1D5	20	0.15	0.13	0.28	21.7421	77.6503
BL	18	0.15	0.11	0.26	21.7016	83.4677			D1D5	20	0.17	0.17	0.34	18.9636	55.7753
BL	18	0.15	0.1	0.25	21.3189	85.2758			D1D5	20	0.16	0.15	0.31	20.6129	66.4931
BL	18	0.14	0.12	0.26	19.2715	74.1212			D1D8	2	0.14	0.08	0.22	25.6318	116.508
BL	18	0.16	0.11	0.27	21.8709	81.0034			D1D8	2	0.11	0.12	0.23	8.95547	38.9368
BL	19	0.18	0.15	0.33	21.226	64.3213			D1D8	2	0.17	0.15	0.32	21.2165	66.3016
BL	19	0.15	0.12	0.27	19.5729	72.4922			D1D8	2	0.16	0.09	0.25	26.833	107.332
BL	19	0.14	0.13	0.27	19.5306	72.3357			D1D8	2	0.12	0.07	0.19	27.2186	143.256
BL	19	0.14	0.09	0.23	22.5612	98.092			D1D8	2	0.09	0.05	0.14	23.3828	167.02
BL	19	0.11	0.1	0.21	19.668	93.6574			D1D8	2	0.11	0.07	0.18	21.7908	121.06
BL	19	0.15	0.09	0.24	16.5379	68.9079			D1D8	2	0.16	0.08	0.24	23.7966	99.1523
BL	19	0.16	0.14	0.3	15.2439	50.813			D1D8	3	0.13	0.08	0.21	22.1608	105.528
BL	19	0.19	0.18	0.37	18.3561	49.611			D1D8	3	0.13	0.06	0.19	25.7371	135.458
BL	20	0.14	0.14	0.28	17.8197	63.6418			D1D8	3	0.14	0.07	0.21	22.9113	109.101
BL	20	0.13	0.12	0.25	20.4276	81.7103			D1D8	3	0.14	0.07	0.21	22.4082	106.706
BL	20	0.16	0.2	0.36	16.5939	46.0943			D1D8	3	0.13	0.09	0.22	21.9756	99.8893
BL	20	0.14	0.19	0.33	15.9941	48.467			D1D8	3	0.14	0.08	0.22	21.9149	99.6134
BL	20	0.17	0.14	0.31	22.1161	69.1129			D1D8	3	0.15	0.12	0.27	18.2151	67.4632
BL	20	0.19	0.15	0.34	19.9419	58.6527			D1D8	3	0.15	0.1	0.25	20.2503	81.0011
BL	20	0.17	0.14	0.31	19.8037	63.8828			D1D8	4	0.14	0.1	0.24	24.9301	103.875
BL	20	0.16	0.1	0.26	22.0781	84.9158			D1D8	4	0.15	0.1	0.25	23.4443	93.7772
BL	20	0.17	0.11	0.28	21.9434	78.3692			D1D8	4	0.13	0.08	0.21	22.3064	106.221
BL	20	0.14	0.11	0.25	22.7296	90.9185			D1D8	4	0.13	0.09	0.22	22.1863	100.847
PD1	2	0.16	0.12	0.28	20.8741	74.5505			D1D8	4	0.14	0.08	0.22	23.1179	105.081
PD1	2	0.14	0.09	0.23	21.5936	93.8851			D1D8	4	0.15	0.1	0.25	21.9947	87.9786
PD1	2	0.14	0.15	0.29	19.1038	65.8751			D1D8	4	0.14	0.1	0.24	21.8682	91.1177
PD1	2	0.16	0.12	0.28	20.9773	74.9189			D1D8	4	0.14	0.1	0.24	20.8075	86.6981
PD1	2	0.14	0.08	0.22	20.3112	92.3234			D1D8	4	0.14	0.1	0.24	22.1955	92.4812
PD1	2	0.14	0.14	0.28	14.4906	51.7521			D1D8	5	0.17	0.11	0.28	23.1562	82.7007
PD1	2	0.13	0.14	0.27	14.7942	54.7934			D1D8	5	0.15	0.09	0.24	21.9532	91.4718
PD1	2	0.15	0.11	0.26	19.4158	74.6763			D1D8	5	0.16	0.09	0.25	25.2347	100.939
PD1	2	0.14	0.07	0.21	23.1688	110.328			D1D8	5	0.18	0.15	0.33	18.5943	56.3464
PD1	3	0.16	0.1	0.26	20.8536	80.2063			D1D8	5	0.2	0.21	0.41	15.8158	38.575
PD1	3	0.16	0.1	0.26	19.4783	74.9164			D1D8	5	0.19	0.17	0.36	21.6705	60.1957
PD1	3	0.15	0.14	0.29	18.2746	63.016			D1D8	5	0.17	0.11	0.28	22.643	78.0792
PD1	3	0.19	0.14	0.33	18.5678	56.2661			D1D8	5	0.17	0.13	0.3	22.156	73.8532
PD1	3	0.14	0.1	0.24	18.4326	76.8026			D1D8	5	0.18	0.14	0.32	16.572	51.7875
PD1	3	0.18	0.1	0.28	17.8389	63.7104			D1D8	6	0.14	0.07	0.21	24.0344	114.449
PD1	3	0.17	0.13	0.3	19.8535	66.1784			D1D8	6	0.12	0.08	0.2	23.1156	115.578
PD1	3	0.16	0.19	0.35	14.9306	42.6588			D1D8	6	0.16	0.09	0.25	20.9136	83.6545
PD1	3	0.13	0.11	0.24	17.2284	71.7851			D1D8	6	0.16	0.12	0.28	17.7261	63.3075
PD1	3	0.19	0.15	0.34	21.0124	61.8011			D1D8	6	0.16	0.16	0.32	22.7935	71.2297
PD1	4	0.1	0.2	0.3	13.3381	44.4602			D1D8	6	0.15	0.15	0.3	17.8566	59.522
PD1	4	0.17	0.11	0.28	16.3437	58.3702			D1D8	6	0.17	0.16	0.33	23.8516	72.2777
PD1	4	0.16	0.15	0.31	17.1883	55.4461			D1D8	6	0.17	0.1	0.27	21.8326	80.8613
PD1	4	0.16	0.2	0.36	17.1816	47.7266			D1D8	6	0.14	0.16	0.3	19.23	64.1
PD1	4	0.17	0.19	0.36	16.6473	46.2424			D1D8	7	0.15	0.06	0.21	28.0682	133.658
PD1	4	0.14	0.25	0.39	14.993	38.4436			D1D8	7	0.14	0.09	0.23	21.8987	95.2117
PD1	4	0.15	0.19	0.34	16.6318	48.9171			D1D8	7	0.13	0.08	0.21	22.2509	105.957
PD1	4	0.16	0.16	0.32	18.4586	57.6832			D1D8	7	0.15	0.06	0.21	27.8976	132.846
PD1	4	0.16	0.15	0.31	18.3932	59.3331			D1D8	7	0.15	0.1	0.25	21.2481	84.9923
PD1	4	0.15	0.13	0.28	20.3344	72.6227			D1D8	7	0.15	0.1	0.25	19.8122	79.2487
PD1	4	0.17	0.12	0.29	17.6152	60.7419			D1D8	7	0.13	0.08	0.21	21.6863	103.268
PD1	4	0.15	0.11	0.26	19.8617	76.3911			D1D8	7	0.16	0.09	0.25	22.0152	88.0609
PD1	4	0.16	0.12	0.28	21.3827	76.3669			D1D8	8	0.14	0.08	0.22	22.6184	102.811
PD1	5	0.16	0.21	0.37	16.2156	43.826			D1D8	8	0.17	0.11	0.28	20.731	74.0393
PD1	5	0.16	0.12	0.28	19.8058	70.7351			D1D8	8	0.11	0.07	0.18	23.5634	130.908
PD1	5	0.15	0.13	0.28	19.2963	68.9152			D1D8	8	0.15	0.09	0.24	20.4373	85.1553
PD1	5	0.18	0.13	0.31	19.2325	62.0404			D1D8	8	0.14	0.08	0.22	23.0584	104.811
PD1	5	0.14	0.11	0.25	17.7006	70.8023			D1D8	8	0.15	0.09	0.24	20.1305	83.877
PD1	5	0.15	0.11	0.26	19.4842	74.9393			D1D8	8	0.1	0.05	0.15	21.3315	142.21
PD1	5	0.17	0.13	0.3	19.0548	63.5161			D1D8	8	0.13	0.07	0.2	22.9936	114.968
PD1	5	0.13	0.13	0.26	17.8404	68.6171			D1D8	9	0.15	0.08	0.23	25.8108	112.221
PD1	5	0.19	0.13	0.32	16.5637	51.7615			D1D8	9	0.15	0.14	0.29	16.9656	58.5022
PD1	6	0.2	0.15	0.35	16.5631	47.3232			D1D8	9	0.13	0.13	0.26	17.2528	66.357
PD1	6	0.19	0.15	0.34	16.6244	48.8952			D1D8	9	0.14	0.07	0.21	21.4451	102.119
PD1	6	0.16	0.1	0.26	22.4494	86.3438			D1D8	9	0.15	0.11	0.26	18.2495	70.1904
PD1	6	0.13	0.11	0.24	19.0119	79.2162			D1D8	9	0.15	0.09	0.24	24.3796	101.582
PD1	6	0.14	0.11	0.25	20.4238	81.6951			D1D8	9	0.14	0.08	0.22	24.087	109.486
PD1	6	0.13	0.25	0.38	15.0266	39.5436			D1D8	9	0.14	0.11	0.25	18.9109	75.6436
PD1	6	0.16	0.17	0.33	18.5842	56.3159			D1D8	9	0.11	0.13	0.24	17.4434	72.681
PD1	6	0.17	0.18	0.35	17.0735	48.7814			D1D8	9	0.13	0.1	0.23	20.6867	89.9424
PD1	7	0.16	0.19	0.35	16.4707	47.0592			D1D8	10	0.12	0.1	0.22	22.6863	103.12
PD1	7	0.16	0.18	0.34	17.6201	51.8239			D1D8	10	0.13	0.09	0.22	22.3609	101.64
PD1	7	0.18	0.1	0.28	21.9254	78.3051			D1D8	10	0.13	0.08	0.21	23.4441	111.638
PD1	7	0.14	0.09	0.23	21.5387	93.6466			D1D8	10	0.13	0.07	0.2	26.3271	131.635
PD1	7	0.15	0.1	0.25	22.626	90.504			D1D8	10	0.11	0.08	0.19	20.7034	108.965
PD1	7	0.13	0.11	0.24	21.3952	89.1467			D1D8	10	0.12	0.11	0.23	20.8461	90.6353
PD1	7	0.15	0.11	0.26	17.0793	65.6897			D1D8	10	0.12	0.08	0.2	24.9224	124.612
PD1	7	0.14	0.08	0.22	21.6603	98.4557			D1D8	10	0.12	0.07	0.19	23.0244	121.181
PD1	7	0.14	0.1	0.24	21.1168	87.9866			D1D8	11	0.21	0.16	0.37	19.4276	52.5069
PD1	8	0.12	0.14	0.26	18.586	71.4847			D1D8	11	0.24	0.21	0.45	18.5614	41.2475
PD1	8	0.13	0.1	0.23	20.5756	89.4591			D1D8	11	0.19	0.14	0.33	19.4409	58.9117
PD1	8	0.18	0.14	0.32	18.8791	58.9972			D1D8	11	0.18	0.16	0.34	17.0797	50.2345
PD1	8	0.18	0.16	0.34	18.5153	54.4567			D1D8	11	0.2	0.15	0.35	20.05	57.2858
PD1	8	0.16	0.15	0.31	15.1504	48.8723			D1D8	11	0.18	0.17	0.35	18.3197	52.342
PD1	8	0.17	0.13	0.3	21.2492	70.8306			D1D8	11	0.18	0.14	0.32	19.057	59.553
PD1	8	0.17	0.11	0.28	20.2715	72.3983			D1D8	11	0.16	0.09	0.25	23.0777	92.3106
PD1	8	0.14	0.13	0.27	19.3556	71.6874			D1D8	11	0.18	0.16	0.34	18.5709	54.6202
PD1	8	0.14	0.14	0.28	18.3581	65.5648			D1D8	11	0.16	0.13	0.29	19.1807	66.1404
PD1	8	0.15	0.09	0.24	21.7369	90.5704			D1D8	12	0.15	0.07	0.22	25.0011	113.641
PD1	8	0.13	0.09	0.22	20.0481	91.1278			D1D8	12	0.13	0.07	0.2	22.5023	112.512
PD1	8	0.13	0.1	0.23	20.455	88.935			D1D8	12	0.1	0.06	0.16	23.9291	149.557
PD1	9	0.16	0.12	0.28	19.4214	69.362			D1D8	12	0.1	0.08	0.18	25.3179	140.655
PD1	9	0.16	0.12	0.28	18.8695	67.3912			D1D8	12	0.16	0.11	0.27	19.3041	71.4967
PD1	9	0.16	0.15	0.31	19.4316	62.6826			D1D8	12	0.16	0.17	0.33	19.9361	60.4124
PD1	9	0.12	0.13	0.25	17.3363	69.3454			D1D8	12	0.12	0.09	0.21	22.7255	108.217
PD1	9	0.14	0.11	0.25	19.1361	76.5443			D1D8	12	0.12	0.08	0.2	24.0519	120.26
PD1	9	0.15	0.11	0.26	21.6025	83.0867			D1D8	12	0.13	0.06	0.19	25.4416	133.903
PD1	9	0.16	0.14	0.3	20.4518	68.1725			D1D8	13	0.11	0.07	0.18	17.0512	94.7289
PD1	9	0.13	0.15	0.28	13.1572	46.9898			D1D8	13	0.12	0.09	0.21	22.2658	106.027
PD1	9	0.15	0.25	0.4	16.8328	42.0821			D1D8	13	0.12	0.05	0.17	30.6134	180.079
PD1	10	0.14	0.11	0.25	22.6822	90.7288			D1D8	13	0.13	0.07	0.2	26.5007	132.504
PD1	10	0.12	0.11	0.23	19.0622	82.879			D1D8	13	0.12	0.1	0.22	19.6923	89.5106
PD1	10	0.16	0.15	0.31	15.3607	49.5506			D1D8	13	0.15	0.12	0.27	22.9753	85.0937
PD1	10	0.18	0.16	0.34	17.5677	51.6696			D1D8	13	0.15	0.07	0.22	22.5163	102.347
PD1	10	0.16	0.14	0.3	16.6503	55.5009			D1D8	13	0.14	0.09	0.23	21.7611	94.6136
PD1	10	0.16	0.1	0.26	19.1096	73.4983			D1D8	13	0.14	0.06	0.2	27.3861	136.931
PD1	10	0.15	0.19	0.34	14.7023	43.2422			D1D8	14	0.14	0.08	0.22	24.0969	109.532
PD1	10	0.17	0.19	0.36	16.2182	45.0504			D1D8	14	0.13	0.06	0.19	27.2058	143.188
PD1	10	0.2	0.22	0.42	14.3121	34.0765			D1D8	14	0.17	0.07	0.24	28.0277	116.782
PD1	10	0.17	0.16	0.33	15.5716	47.1866			D1D8	14	0.11	0.06	0.17	25.2575	148.574
PD1	10	0.17	0.16	0.33	17.63	53.4241			D1D8	14	0.15	0.22	0.37	17.0804	46.1632
PD1	10	0.17	0.2	0.37	16.4661	44.5029			D1D8	14	0.17	0.14	0.31	16.3294	52.6754
PD1	10	0.17	0.15	0.32	15.2336	47.605			D1D8	14	0.15	0.07	0.22	23.5324	106.965
PD1	11	0.14	0.11	0.25	17.3965	69.5861			D1D8	14	0.14	0.08	0.22	24.6023	111.829
PD1	11	0.13	0.11	0.24	18.2437	76.0152			D1D8	15	0.19	0.23	0.42	16.7364	39.8485
PD1	11	0.22	0.23	0.45	18.6052	41.345			D1D8	15	0.21	0.27	0.48	19.2292	40.0609
PD1	11	0.17	0.25	0.42	16.0772	38.2791			D1D8	15	0.18	0.13	0.31	20.1837	65.1087
PD1	11	0.2	0.15	0.35	17.5394	50.1126			D1D8	15	0.14	0.11	0.25	20.3539	81.4156
PD1	11	0.18	0.14	0.32	20.152	62.975			D1D8	15	0.15	0.13	0.28	19.1698	68.4634
PD1	11	0.18	0.14	0.32	20.0884	62.7761			D1D8	15	0.14	0.16	0.3	16.568	55.2265
PD1	11	0.19	0.15	0.34	19.4298	57.1464			D1D8	15	0.17	0.22	0.39	17.173	44.0334
PD1	11	0.19	0.16	0.35	18.8275	53.7929			D1D8	15	0.13	0.1	0.23	15.3636	66.7985
PD1	11	0.17	0.16	0.33	16.5084	50.0254			D1D8	15	0.15	0.12	0.27	17.5431	64.9744
PD1	11	0.21	0.27	0.48	16.9331	35.2773			D1D8	15	0.16	0.19	0.35	18.9776	54.2216
PD1	11	0.19	0.17	0.36	18.3896	51.0822			D1D8	15	0.14	0.12	0.26	18.3698	70.6529
PD1	12	0.21	0.31	0.52	16.083	30.9288			D1D8	16	0.15	0.1	0.25	22.9605	91.8421
PD1	12	0.22	0.21	0.43	17.014	39.5675			D1D8	16	0.15	0.08	0.23	25.4287	110.56
PD1	12	0.15	0.15	0.3	19.3025	64.3418			D1D8	16	0.11	0.07	0.18	18.448	102.489
PD1	12	0.14	0.14	0.28	18.8581	67.3502			D1D8	16	0.13	0.09	0.22	23.1511	105.232
PD1	12	0.18	0.13	0.31	23.3186	75.2212			D1D8	16	0.14	0.07	0.21	25.8985	123.326
PD1	12	0.16	0.11	0.27	24.4245	97.6981			D1D8	16	0.14	0.09	0.23	19.4824	84.7059
PD1	12	0.16	0.12	0.28	20.9067	74.6668			D1D8	16	0.13	0.07	0.2	24.4802	122.401
PD1	12	0.17	0.15	0.32	21.5182	67.2444			D1D8	16	0.15	0.09	0.24	27.2802	113.668
PD1	12	0.16	0.12	0.28	19.702	70.3642			D1D8	17	0.18	0.13	0.31	20.9943	67.7237
PD1	13	0.18	0.12	0.3	20.7729	69.243			D1D8	17	0.17	0.14	0.31	20.6445	66.5953
PD1	13	0.18	0.11	0.29	24.1801	83.3795			D1D8	17	0.17	0.17	0.34	18.754	55.1589
PD1	13	0.16	0.12	0.28	18.2698	65.2493			D1D8	17	0.15	0.18	0.33	16.7736	50.8292
PD1	13	0.14	0.13	0.27	19.2644	71.3498			D1D8	17	0.16	0.18	0.34	20.5112	60.3271
PD1	13	0.16	0.12	0.28	22.7017	81.0774			D1D8	17	0.17	0.13	0.3	19.9067	66.3558
PD1	13	0.19	0.17	0.36	21.0128	58.3688			D1D8	17	0.15	0.12	0.27	22.0933	81.8272
PD1	13	0.14	0.17	0.31	17.785	57.3709			D1D8	17	0.16	0.1	0.26	21.7294	83.5747
PD1	13	0.16	0.16	0.32	21.1216	66.005			D1D8	17	0.18	0.13	0.31	19.3916	62.5535
PD1	14	0.13	0.13	0.26	18.825	72.4038			D1D8	17	0.18	0.2	0.38	19.2365	50.6223
PD1	14	0.13	0.1	0.23	20.2849	88.1951			D1D8	17	0.19	0.13	0.32	20.1034	62.8233
PD1	14	0.18	0.16	0.34	20.8381	61.2885			D1D8	18	0.15	0.08	0.23	30.1194	130.954
PD1	14	0.16	0.16	0.32	20.466	63.9563			D1D8	18	0.13	0.09	0.22	24.0941	109.519
PD1	14	0.15	0.12	0.27	21.251	78.7075			D1D8	18	0.12	0.11	0.23	21.6391	94.0829
PD1	14	0.17	0.13	0.3	21.224	64.3153			D1D8	18	0.14	0.14	0.28	19.7097	70.3917
PD1	14	0.16	0.15	0.31	19.5836	63.1729			D1D8	18	0.13	0.11	0.24	23.7642	99.0173
PD1	14	0.15	0.13	0.28	20.9002	74.6436			D1D8	18	0.13	0.1	0.23	25.584	111.235
PD1	14	0.16	0.17	0.33	21.2804	64.4861			D1D8	18	0.14	0.07	0.21	26.1418	124.485
PD1	15	0.17	0.15	0.32	19.101	59.6906			D1D8	18	0.13	0.13	0.26	24.3208	93.5416
PD1	15	0.16	0.14	0.3	19.9669	66.5564			D1D8	18	0.13	0.12	0.25	22.4692	89.8767
PD1	15	0.16	0.2	0.36	16.6298	46.194			D1D8	18	0.14	0.11	0.25	24.8836	99.5342
PD1	15	0.2	0.17	0.37	20.337	54.9649			D1D8	19	0.11	0.08	0.19	23.6196	124.314
PD1	15	0.19	0.14	0.33	19.0512	57.7308			D1D8	19	0.14	0.1	0.24	24.4927	102.053
PD1	15	0.17	0.19	0.36	17.4086	48.3571			D1D8	19	0.14	0.07	0.21	24.618	117.228
PD1	15	0.15	0.23	0.38	15.3869	40.4918			D1D8	19	0.14	0.1	0.24	21.96	91.5
PD1	15	0.14	0.15	0.29	18.1447	62.5679			D1D8	19	0.13	0.1	0.23	20.8888	90.821
PD1	15	0.16	0.13	0.29	18.4398	63.5856			D1D8	19	0.13	0.07	0.2	22.8586	114.293
PD1	15	0.2	0.2	0.4	17.7087	44.2717			D1D8	19	0.12	0.07	0.19	25.6481	134.99
PD1	15	0.2	0.16	0.36	20.2806	56.335			D1D8	19	0.14	0.1	0.24	21.3912	89.13
PD1	16	0.17	0.12	0.29	18.6229	64.2168			D1D8	19	0.12	0.1	0.22	22.0234	100.106
PD1	16	0.16	0.12	0.28	18.3225	65.4377			D1D8	20	0.14	0.1	0.24	20.3003	84.5847
PD1	16	0.16	0.13	0.29	19.6031	67.5969			D1D8	20	0.16	0.13	0.29	19.6734	67.8392
PD1	16	0.16	0.13	0.29	19.187	66.1619			D1D8	20	0.13	0.1	0.23	21.1209	91.8302
PD1	16	0.18	0.16	0.34	19.7919	58.2115			D1D8	20	0.15	0.13	0.28	19.9396	71.2129
PD1	16	0.16	0.17	0.33	18.0786	54.7835			D1D8	20	0.14	0.15	0.29	16.2388	55.9959
PD1	16	0.18	0.15	0.33	18.324	55.5272			D1D8	20	0.15	0.1	0.25	21.687	86.7481
PD1	16	0.17	0.17	0.34	16.929	49.7913			D1D8	20	0.12	0.08	0.2	22.3588	111.794
PD1	17	0.14	0.12	0.26	23.7565	91.3713			D1D8	20	0.15	0.11	0.26	20.847	80.1809
PD1	17	0.14	0.11	0.25	17.184	68.7359			D1D8	20	0.15	0.1	0.25	22.0537	88.2149
PD1	17	0.2	0.14	0.34	17.7857	52.3109			D2D5	5	0.13	0.09	0.22	24.5677	111.672
PD1	17	0.16	0.16	0.32	19.4209	60.6903			D2D5	5	0.13	0.14	0.27	21.0317	77.8951
PD1	17	0.17	0.14	0.31	19.8099	63.903			D2D5	5	0.13	0.13	0.26	19.9948	76.9031
PD1	17	0.18	0.15	0.33	18.5232	56.1308			D2D5	5	0.15	0.13	0.28	22.1718	79.185
PD1	17	0.18	0.21	0.39	17.161	44.0025			D2D5	5	0.14	0.11	0.25	21.2772	85.1088
PD1	17	0.16	0.18	0.34	18.1544	53.3952			D2D5	5	0.14	0.11	0.25	21.4584	85.8335
PD1	17	0.2	0.28	0.48	17.8995	37.2906			D2D5	5	0.13	0.06	0.19	34.5062	181.611
PD1	17	0.16	0.25	0.41	12.7443	31.0835			D2D5	5	0.12	0.12	0.24	20.1251	83.8547
PD1	17	0.2	0.27	0.47	15.6343	33.2645			D2D5	5	0.11	0.11	0.22	21.2134	96.4247
PD1	17	0.21	0.27	0.48	16.9953	35.4069			D2D5	6	0.13	0.14	0.27	20.3716	75.4505
PD1	17	0.19	0.22	0.41	16.1869	39.4804			D2D5	6	0.14	0.14	0.28	22.3153	79.6976
PD1	18	0.2	0.26	0.46	16.5857	36.0559			D2D5	6	0.11	0.1	0.21	22.7502	108.334
PD1	18	0.21	0.25	0.46	13.684	29.7478			D2D5	6	0.12	0.11	0.23	21.5868	93.8558
PD1	18	0.14	0.23	0.37	15.6183	42.2117			D2D5	6	0.09	0.09	0.18	23.2327	129.071
PD1	18	0.18	0.21	0.39	14.8178	37.9943			D2D5	6	0.1	0.1	0.2	20.2426	101.213
PD1	18	0.16	0.18	0.34	18.9214	55.6511			D2D5	6	0.1	0.11	0.21	20.6893	98.5203
PD1	18	0.16	0.15	0.31	21.4411	69.1649			D2D5	6	0.13	0.13	0.26	20.3091	78.1119
PD1	18	0.16	0.1	0.26	21.4397	82.4605			D2D5	7	0.1	0.1	0.2	22.6127	113.063
PD1	18	0.18	0.14	0.32	19.3177	60.3679			D2D5	7	0.11	0.11	0.22	27.1487	123.403
PD1	19	0.17	0.13	0.3	21.01	70.0335			D2D5	7	0.11	0.08	0.19	26.2004	137.897
PD1	19	0.17	0.12	0.29	22.0145	75.912			D2D5	7	0.11	0.09	0.2	20.5621	102.811
PD1	19	0.16	0.14	0.3	20.807	69.3565			D2D5	7	0.12	0.09	0.21	28.7281	136.8
PD1	19	0.15	0.14	0.29	21.4149	73.8444			D2D5	7	0.1	0.1	0.2	22.8504	114.252
PD1	19	0.14	0.12	0.26	20.0816	77.237			D2D5	7	0.11	0.1	0.21	23.0237	109.636
PD1	19	0.17	0.11	0.28	19.355	69.1251			D2D5	7	0.11	0.14	0.25	22.7442	90.9766
PD1	19	0.15	0.12	0.27	20.6002	76.2971			D2D5	7	0.12	0.11	0.23	25.6402	111.479
PD1	19	0.14	0.1	0.24	22.266	92.7749			D2D5	7	0.11	0.12	0.23	18.414	80.061
PD1	19	0.16	0.12	0.28	20.4454	73.0194			D2D5	7	0.16	0.19	0.35	18.2337	52.0964
PD1	19	0.13	0.11	0.24	18.6856	77.8566			D2D5	7	0.1	0.1	0.2	23.4008	117.004
PD1	20	0.18	0.16	0.34	16.4832	48.4801			D2D5	8	0.09	0.09	0.18	20.2869	112.705
PD1	20	0.15	0.16	0.31	18.3879	59.3159			D2D5	8	0.08	0.08	0.16	24.0306	150.192
PD1	20	0.17	0.19	0.36	16.662	46.2833			D2D5	8	0.13	0.17	0.3	19.5168	65.056
PD1	20	0.17	0.17	0.34	19.7314	58.0335			D2D5	8	0.14	0.1	0.24	22.9171	95.4881
PD1	20	0.15	0.31	0.46	16.0244	34.8356			D2D5	8	0.1	0.07	0.17	29.6221	174.248
PD1	20	0.16	0.2	0.36	16.9047	46.9576			D2D5	8	0.1	0.07	0.17	25.0099	147.117
PD1	20	0.16	0.16	0.32	15.6866	49.0207			D2D5	8	0.09	0.08	0.17	22.2484	130.873
PD1	20	0.18	0.2	0.38	17.4103	45.8166			D2D5	8	0.09	0.09	0.18	23.45	130.278
PD1	20	0.13	0.16	0.29	17.049	58.7895			D2D5	13	0.1	0.09	0.19	24.4509	128.689
PD1	20	0.17	0.15	0.32	18.9594	59.2482			D2D5	13	0.11	0.11	0.22	21.2356	96.5256
PD1	20	0.17	0.2	0.37	18.4442	49.8492			D2D5	13	0.12	0.11	0.23	23.9692	104.214
Post D1	2	0.16	0.2	0.36	18.7361	52.0447			D2D5	13	0.13	0.08	0.21	29.0663	138.411
Post D1	2	0.14	0.14	0.28	16.9293	60.4617			D2D5	13	0.13	0.12	0.25	24.941	99.7639
Post D1	2	0.15	0.13	0.28	23.0675	82.3838			D2D5	13	0.11	0.07	0.18	28.335	157.417
Post D1	2	0.12	0.11	0.23	23.3686	101.603			D2D5	13	0.14	0.08	0.22	31.4928	143.149
Post D1	2	0.12	0.11	0.23	24.618	107.035			D2D5	13	0.11	0.08	0.19	22.5006	118.424
Post D1	2	0.15	0.14	0.29	23.4371	80.8174			D2D5	13	0.12	0.08	0.2	25.9739	129.87
Post D1	2	0.15	0.14	0.29	21.3081	73.4764			D2D5	13	0.09	0.09	0.18	25.3083	140.601
Post D1	2	0.14	0.18	0.32	23.5552	90.5971			D2D5	14	0.13	0.1	0.23	21.0698	91.6079
Post D1	2	0.15	0.19	0.34	21.9322	64.5064			D2D5	14	0.12	0.11	0.23	21.8664	80.9867
Post D1	3	0.13	0.16	0.29	21.3716	73.6953			D2D5	14	0.11	0.08	0.19	21.9993	104.759
Post D1	3	0.13	0.12	0.25	23.2429	92.9717			D2D5	14	0.12	0.09	0.21	19.3759	92.2663
Post D1	3	0.11	0.16	0.27	18.471	68.4112			D2D5	14	0.11	0.1	0.21	22.631	94.2957
Post D1	3	0.15	0.17	0.32	20.8056	65.0174			D2D5	14	0.11	0.08	0.19	24.3917	121.959
Post D1	3	0.14	0.13	0.27	21.9868	81.4327			D2D5	14	0.12	0.08	0.2	23.6861	118.43
Post D1	3	0.15	0.13	0.28	19.7372	70.49			D2D5	14	0.1	0.08	0.18	21.9084	104.326
Post D1	3	0.15	0.13	0.28	19.2382	68.708			D2D5	14	0.09	0.07	0.16	24.5746	136.526
Post D1	3	0.14	0.14	0.28	19.9299	71.1781			D2D5	14	0.14	0.13	0.27	17.8367	71.3469
Post D1	3	0.14	0.13	0.27	20.3617	75.4138			D2D5	14	0.12	0.1	0.22	23.4793	93.9173
Post D1	3	0.13	0.13	0.26	20.1742	77.5931			D2D5	17	0.13	0.12	0.25	21.6737	86.6947
Post D1	3	0.13	0.14	0.27	20.2437	74.9766			D2D5	17	0.12	0.1	0.22	20.8642	94.8371
Post D1	3	0.14	0.14	0.28	22.0504	78.7513			D2D5	17	0.14	0.21	0.35	19.1413	54.6895
Post D1	3	0.13	0.14	0.27	19.1142	70.7934			D2D5	17	0.12	0.1	0.22	21.7431	98.8322
Post D1	4	0.12	0.11	0.23	20.05	87.1741			D2D5	17	0.11	0.09	0.2	20.8463	104.232
Post D1	4	0.14	0.13	0.27	19.6818	72.8957			D2D5	17	0.15	0.17	0.32	16.9865	53.0828
Post D1	4	0.16	0.14	0.3	22.4192	74.7305			D2D5	17	0.12	0.18	0.3	15.9935	53.3116
Post D1	4	0.14	0.15	0.29	20.6295	71.1362			D2D5	17	0.15	0.13	0.28	22.1092	78.9614
Post D1	4	0.13	0.15	0.28	22.9399	81.9284			D2D5	17	0.12	0.16	0.28	19.1979	68.5639
Post D1	4	0.13	0.19	0.32	20.1167	62.8646			D2D5	17	0.14	0.15	0.29	20.679	71.307
Post D1	4	0.12	0.14	0.26	20.9516	80.5832			D2D5	18	0.13	0.1	0.23	29.1877	145.938
Post D1	4	0.14	0.16	0.3	21.3109	71.0365			D2D5	18	0.12	0.09	0.21	28.562	136.01
Post D1	4	0.14	0.17	0.31	20.8743	67.3364			D2D5	18	0.12	0.11	0.23	26.8852	116.892
Post D1	5	0.13	0.16	0.29	20.9374	72.1981			D2D5	18	0.12	0.09	0.21	25.0093	119.092
Post D1	5	0.13	0.12	0.25	24.312	97.2479			D2D5	18	0.12	0.09	0.21	27.3765	130.364
Post D1	5	0.16	0.12	0.28	24.8848	88.8742			D2D5	18	0.12	0.09	0.21	25.6892	122.33
Post D1	5	0.14	0.1	0.24	23.2783	96.9929			D2D5	18	0.13	0.08	0.21	26.3749	125.595
Post D1	5	0.12	0.11	0.23	19.6873	85.5969			D2D5	18	0.12	0.09	0.21	20.5624	97.9161
Post D1	5	0.13	0.11	0.24	22.4124	93.3848			D2D8	5	0.16	0.11	0.27	24.1691	89.515
Post D1	5	0.15	0.11	0.26	21.2341	81.6698			D2D8	5	0.13	0.1	0.23	28.6553	124.588
Post D1	5	0.15	0.11	0.26	22.8457	87.8681			D2D8	5	0.16	0.11	0.27	26.1033	96.6789
Post D1	5	0.15	0.17	0.32	21.4306	66.9706			D2D8	5	0.12	0.1	0.22	22.5877	102.671
Post D1	5	0.15	0.15	0.3	21.6801	72.267			D2D8	5	0.13	0.12	0.25	23.9147	95.6586
Post D1	6	0.14	0.13	0.27	22.6608	83.9287			D2D8	5	0.13	0.12	0.25	17.375	69.4999
Post D1	6	0.12	0.09	0.21	26.7077	127.179			D2D8	5	0.13	0.18	0.31	20.6421	66.5875
Post D1	6	0.14	0.09	0.23	26.6883	116.036			D2D8	5	0.16	0.12	0.28	22.0326	78.688
Post D1	6	0.11	0.11	0.22	22.6588	102.995			D2D8	5	0.12	0.11	0.23	21.6684	94.2104
Post D1	6	0.11	0.1	0.21	23.8229	113.442			D2D8	5	0.13	0.12	0.25	23.5456	94.1823
Post D1	6	0.11	0.29	0.4	15.7127	39.2817			D2D8	5	0.13	0.11	0.24	22.8216	95.0899
Post D1	6	0.12	0.25	0.37	15.8171	42.749			D2D8	6	0.11	0.1	0.21	22.2072	105.749
Post D1	6	0.16	0.13	0.29	20.5344	70.8084			D2D8	6	0.1	0.09	0.19	23.6999	124.736
Post D1	6	0.13	0.15	0.28	21.8375	77.9911			D2D8	6	0.11	0.07	0.18	24.6096	136.72
Post D1	7	0.14	0.14	0.28	21.5358	89.7325			D2D8	6	0.12	0.07	0.19	25.3276	133.303
Post D1	7	0.12	0.28	0.4	17.3104	66.5784			D2D8	6	0.12	0.11	0.23	19.4322	84.488
Post D1	7	0.14	0.12	0.26	23.4564	90.2171			D2D8	6	0.11	0.1	0.21	23.7729	113.205
Post D1	7	0.13	0.11	0.24	20.1888	84.12			D2D8	6	0.1	0.1	0.2	23.2599	116.3
Post D1	7	0.13	0.13	0.26	22.0063	84.6397			D2D8	6	0.11	0.09	0.2	24.9999	124.999
Post D1	7	0.14	0.22	0.36	18.6102	51.695			D2D8	6	0.13	0.16	0.29	21.1308	72.8648
Post D1	7	0.16	0.22	0.38	18.9903	49.9744			D2D8	6	0.12	0.11	0.23	22.2843	96.8883
Post D1	7	0.15	0.35	0.5	14.086	28.172			D2D8	7	0.12	0.1	0.22	27.5391	125.178
Post D1	7	0.16	0.3	0.46	15.1897	33.021			D2D8	7	0.13	0.11	0.24	24.8124	103.385
Post D1	7	0.15	0.28	0.43	15.9048	36.9879			D2D8	7	0.13	0.12	0.25	22.3427	89.3708
Post D1	8	0.14	0.11	0.25	26.3116	105.246			D2D8	7	0.11	0.09	0.2	21.7091	108.545
Post D1	8	0.13	0.12	0.25	23.6286	94.5144			D2D8	7	0.13	0.12	0.25	23.5466	94.1864
Post D1	8	0.13	0.12	0.25	22.9474	91.7895			D2D8	7	0.13	0.15	0.28	23.1119	82.5425
Post D1	8	0.11	0.12	0.23	22.2067	96.5509			D2D8	7	0.12	0.1	0.22	22.6381	102.9
Post D1	8	0.15	0.14	0.29	19.4712	67.1421			D2D8	7	0.09	0.1	0.19	22.4742	118.285
Post D1	8	0.13	0.15	0.28	20.7329	74.0461			D2D8	8	0.16	0.18	0.34	21.1814	62.2981
Post D1	8	0.12	0.14	0.26	20.5494	79.0362			D2D8	8	0.15	0.17	0.32	22.4235	70.0735
Post D1	8	0.13	0.13	0.26	21.9973	84.6052			D2D8	8	0.14	0.13	0.27	21.3071	78.9152
Post D1	8	0.11	0.13	0.24	19.2115	80.0481			D2D8	8	0.17	0.16	0.33	18.4374	55.871
Post D1	8	0.15	0.17	0.32	20.1896	63.0926			D2D8	8	0.09	0.08	0.17	21.9342	129.025
Post D1	8	0.14	0.21	0.35	18.5274	52.9354			D2D8	8	0.1	0.08	0.18	24.5906	136.614
Post D1	9	0.13	0.22	0.35	18.082	51.6628			D2D8	8	0.13	0.1	0.23	21.4386	93.2113
Post D1	9	0.16	0.17	0.33	19.2806	58.4261			D2D8	8	0.11	0.07	0.18	25.2846	140.47
Post D1	9	0.12	0.1	0.22	29.8723	135.783			D2D8	8	0.09	0.07	0.16	27.661	172.881
Post D1	9	0.1	0.17	0.27	18.1935	67.3834			D2D8	8	0.15	0.07	0.22	35.2143	195.635
Post D1	9	0.13	0.11	0.24	26.4943	110.393			D2D8	13	0.13	0.16	0.29	21.6817	74.7646
Post D1	9	0.11	0.12	0.23	20.7196	90.0851			D2D8	13	0.12	0.1	0.22	22.6452	102.933
Post D1	9	0.13	0.13	0.26	21.755	83.6732			D2D8	13	0.11	0.06	0.17	29.6127	174.193
Post D1	9	0.13	0.13	0.26	24.0264	92.4093			D2D8	13	0.1	0.05	0.15	27.3383	182.256
Post D1	9	0.13	0.13	0.26	24.416	93.9078			D2D8	13	0.11	0.17	0.28	22.7498	81.2494
Post D1	9	0.11	0.13	0.24	23.1912	96.6302			D2D8	13	0.12	0.09	0.21	28.0167	133.413
Post D1	10	0.11	0.14	0.25	24.3703	97.4814			D2D8	13	0.13	0.07	0.2	33.137	165.685
Post D1	10	0.11	0.11	0.22	24.6139	111.881			D2D8	13	0.09	0.06	0.15	29.5677	197.118
Post D1	10	0.11	0.13	0.24	20.7445	86.4355			D2D8	13	0.11	0.08	0.19	28.7414	151.271
Post D1	10	0.14	0.1	0.24	24.3811	101.588			D2D8	13	0.14	0.06	0.2	35.4665	161.211
Post D1	10	0.13	0.13	0.26	23.6861	91.1004			D2D8	13	0.1	0.09	0.19	28.7797	179.873
Post D1	10	0.13	0.12	0.25	21.1882	84.7528			D2D8	13	0.12	0.06	0.18	30.3192	144.377
Post D1	10	0.13	0.1	0.23	20.0672	87.2485			D2D8	14	0.1	0.07	0.17	23.7647	139.793
Post D1	10	0.12	0.1	0.22	20.9493	95.2242			D2D8	14	0.11	0.15	0.26	17.3453	66.7126
Post D1	10	0.14	0.15	0.29	20.6868	71.334			D2D8	14	0.09	0.1	0.19	22.7704	119.844
Post D1	10	0.14	0.15	0.29	22.4366	77.3675			D2D8	14	0.13	0.15	0.28	19.5912	69.9684
Post D1	11	0.12	0.14	0.26	20.3133	78.1281			D2D8	14	0.12	0.15	0.27	21.3018	78.8954
Post D1	11	0.14	0.12	0.26	19.876	76.446			D2D8	14	0.08	0.08	0.16	20.2229	126.393
Post D1	11	0.14	0.27	0.41	17.5629	42.8363			D2D8	14	0.12	0.15	0.27	20.4759	75.8368
Post D1	11	0.16	0.21	0.37	22.2441	60.1192			D2D8	14	0.11	0.12	0.23	20.6116	89.6156
Post D1	11	0.16	0.17	0.33	22.0257	66.7446			D2D8	14	0.12	0.09	0.21	22.4668	106.985
Post D1	11	0.17	0.17	0.34	22.145	65.1323			D2D8	14	0.09	0.08	0.17	23.3571	137.395
Post D1	11	0.16	0.27	0.43	19.5044	45.3591			D2D8	14	0.1	0.08	0.18	23.6135	131.186
Post D1	11	0.16	0.25	0.41	19.6192	47.8516			D2D8	17	0.13	0.11	0.24	24.1677	100.699
Post D1	11	0.14	0.19	0.33	21.1387	64.0566			D2D8	17	0.17	0.21	0.38	19.4234	51.1143
Post D1	11	0.16	0.16	0.32	23.1642	72.3881			D2D8	17	0.16	0.21	0.37	19.044	51.4702
Post D1	11	0.16	0.19	0.35	21.5304	61.5155			D2D8	17	0.15	0.14	0.29	23.4706	80.933
Post D1	11	0.15	0.16	0.31	22.7791	73.4809			D2D8	17	0.14	0.12	0.26	23.402	90.0076
Post D1	12	0.16	0.19	0.35	20.7014	59.1467			D2D8	17	0.13	0.1	0.23	24.7678	107.686
Post D1	12	0.16	0.19	0.35	21.8301	62.3717			D2D8	17	0.12	0.11	0.23	23.2252	100.979
Post D1	12	0.14	0.1	0.24	27.7479	115.616			D2D8	17	0.13	0.09	0.22	25.9618	118.008
Post D1	12	0.17	0.15	0.32	25.5688	79.9025			D2D8	18	0.12	0.07	0.19	28.9165	152.192
Post D1	12	0.13	0.11	0.24	26.3346	109.728			D2D8	18	0.12	0.08	0.2	29.1237	145.618
Post D1	12	0.15	0.14	0.29	25.077	86.4724			D2D8	18	0.12	0.09	0.21	27.8903	132.811
Post D1	12	0.15	0.14	0.29	22.244	76.7036			D2D8	18	0.12	0.08	0.2	27.1212	135.606
Post D1	12	0.14	0.1	0.24	26.2869	109.529			D2D8	18	0.11	0.09	0.2	27.4631	137.315
Post D1	12	0.16	0.11	0.27	29.4294	108.998			D2D8	18	0.14	0.07	0.21	33.0607	157.432
Post D1	13	0.14	0.09	0.23	25.9562	112.853			D2D8	18	0.14	0.09	0.23	27.7523	120.662
Post D1	13	0.12	0.1	0.22	26.4269	120.122			D2D8	18	0.11	0.08	0.19	26.2935	138.387
Post D1	13	0.1	0.16	0.26	22.3755	86.0598			D2D8	18	0.13	0.09	0.22	26.7911	121.778
Post D1	13	0.12	0.1	0.22	28.072	127.6			D2D8	18	0.11	0.09	0.2	25.3708	126.854
Post D1	13	0.11	0.14	0.25	23.0198	92.0793			D2D13	5	0.16	0.16	0.32	21.4733	67.1039
Post D1	13	0.12	0.09	0.21	24.4614	116.483			D2D13	5	0.15	0.16	0.31	18.4011	59.3585
Post D1	13	0.12	0.12	0.24	23.0628	96.0951			D2D13	5	0.11	0.12	0.23	18.8119	81.7907
Post D1	13	0.13	0.11	0.24	26.3777	109.907			D2D13	5	0.15	0.16	0.31	23.015	74.242
Post D1	13	0.13	0.13	0.26	24.8732	95.6662			D2D13	5	0.13	0.11	0.24	21.6723	90.3013
Post D1	13	0.12	0.13	0.25	19.752	79.0081			D2D13	5	0.14	0.1	0.24	26.0876	108.698
Post D1	14	0.13	0.17	0.3	24.2483	80.8276			D2D13	5	0.14	0.11	0.25	22.9797	91.919
Post D1	14	0.13	0.1	0.23	26.007	113.074			D2D13	5	0.09	0.08	0.17	20.3522	119.719
Post D1	14	0.12	0.15	0.27	20.9265	77.5056			D2D13	5	0.16	0.15	0.31	21.0285	67.8338
Post D1	14	0.14	0.15	0.29	22.4035	77.2534			D2D13	5	0.14	0.14	0.28	22.2572	79.4898
Post D1	14	0.12	0.13	0.25	21.772	87.0881			D2D13	5	0.16	0.15	0.31	21.2862	68.6652
Post D1	14	0.12	0.12	0.24	22.5314	93.881			D2D13	5	0.14	0.13	0.27	20.58	76.2221
Post D1	14	0.16	0.13	0.29	25.2793	87.17			D2D13	6	0.11	0.07	0.18	25.7748	143.193
Post D1	14	0.13	0.12	0.25	22.3872	89.5489			D2D13	6	0.1	0.09	0.19	23.3312	122.796
Post D1	14	0.13	0.14	0.27	20.7641	76.9041			D2D13	6	0.1	0.08	0.18	24.2968	134.982
Post D1	14	0.13	0.16	0.29	20.7718	71.6269			D2D13	6	0.15	0.1	0.25	21.8645	87.4579
Post D1	15	0.15	0.2	0.35	18.2925	52.2643			D2D13	6	0.14	0.13	0.27	22.2548	82.4254
Post D1	15	0.13	0.23	0.36	16.7076	46.4101			D2D13	6	0.11	0.12	0.23	22.8934	99.5364
Post D1	15	0.18	0.23	0.41	17.3118	42.2239			D2D13	6	0.12	0.15	0.27	19.3588	71.6992
Post D1	15	0.17	0.3	0.47	15.033	31.9852			D2D13	6	0.15	0.16	0.31	20.3836	65.7537
Post D1	15	0.17	0.3	0.47	17.1792	36.5514			D2D13	6	0.1	0.08	0.18	25.0699	139.277
Post D1	15	0.11	0.12	0.23	19.2726	83.7941			D2D13	7	0.11	0.08	0.19	33.5057	176.346
Post D1	15	0.15	0.14	0.29	22.0071	75.8867			D2D13	7	0.09	0.08	0.17	23.9003	140.59
Post D1	15	0.16	0.14	0.3	20.8412	69.4706			D2D13	7	0.12	0.07	0.19	30.4122	160.064
Post D1	15	0.15	0.2	0.35	18.5225	52.9214			D2D13	7	0.12	0.08	0.2	29.9118	149.559
Post D1	15	0.14	0.16	0.3	19.0732	63.5775			D2D13	7	0.11	0.08	0.19	21.0701	110.895
Post D1	16	0.16	0.18	0.34	20.4088	60.0259			D2D13	7	0.12	0.11	0.23	28.856	125.461
Post D1	16	0.15	0.16	0.31	19.8407	64.0023			D2D13	7	0.12	0.09	0.21	32.803	156.205
Post D1	16	0.14	0.13	0.27	21.7848	80.6843			D2D13	7	0.11	0.08	0.19	26.6277	140.146
Post D1	16	0.13	0.16	0.29	17.0642	58.8422			D2D13	7	0.12	0.08	0.2	28.6629	143.314
Post D1	16	0.15	0.11	0.26	24.3054	93.4821			D2D13	8	0.1	0.06	0.16	27.6538	172.836
Post D1	16	0.11	0.1	0.21	21.9674	104.607			D2D13	8	0.11	0.09	0.2	23.5762	117.881
Post D1	16	0.13	0.1	0.23	24.5959	106.939			D2D13	8	0.12	0.07	0.19	29.4691	155.101
Post D1	16	0.12	0.1	0.22	23.3675	106.216			D2D13	8	0.1	0.06	0.16	21.559	134.744
Post D1	17	0.13	0.1	0.23	24.3514	105.876			D2D13	8	0.11	0.1	0.21	21.5593	102.663
Post D1	17	0.12	0.07	0.19	31.4733	165.649			D2D13	8	0.11	0.1	0.21	22.3685	106.516
Post D1	17	0.15	0.16	0.31	22.5616	72.7793			D2D13	8	0.11	0.07	0.18	22.242	123.566
Post D1	17	0.15	0.16	0.31	23.6886	76.4149			D2D13	8	0.13	0.14	0.27	16.8751	62.5006
Post D1	17	0.15	0.2	0.35	20.7043	59.1551			D2D13	8	0.11	0.07	0.18	27.71	153.945
Post D1	17	0.15	0.19	0.34	20.1239	59.1878			D2D13	13	0.1	0.07	0.17	28.9373	170.219
Post D1	17	0.13	0.16	0.29	20.252	69.8343			D2D13	13	0.11	0.09	0.2	23.9985	119.993
Post D1	17	0.15	0.19	0.34	20.6268	60.667			D2D13	13	0.13	0.1	0.23	21.874	95.1042
Post D1	17	0.16	0.15	0.31	20.9393	67.5461			D2D13	13	0.09	0.1	0.19	23.7858	125.188
Post D1	17	0.15	0.15	0.3	20.3226	67.742			D2D13	13	0.12	0.09	0.21	23.5614	112.197
Post D1	17	0.13	0.14	0.27	21.0643	78.016			D2D13	13	0.1	0.12	0.22	19.8558	90.2536
Post D1	18	0.14	0.18	0.32	21.3735	66.792			D2D13	13	0.12	0.1	0.22	25.313	115.059
Post D1	18	0.15	0.2	0.35	20.9659	59.9026			D2D13	13	0.12	0.08	0.2	27.3023	136.512
Post D1	18	0.11	0.1	0.21	24.096	114.743			D2D13	13	0.1	0.08	0.18	24.5939	136.633
Post D1	18	0.14	0.1	0.24	25.8316	107.632			D2D13	13	0.11	0.09	0.2	25.6276	128.138
Post D1	18	0.13	0.1	0.23	29.3521	127.618			D2D13	14	0.13	0.12	0.25	23.3553	93.4211
Post D1	18	0.13	0.13	0.26	22.368	86.0308			D2D13	14	0.14	0.11	0.25	26.1368	104.547
Post D1	18	0.13	0.11	0.24	26.7225	111.344			D2D13	14	0.11	0.09	0.2	29.5586	147.793
Post D1	18	0.11	0.11	0.22	25.0562	113.892			D2D13	14	0.14	0.09	0.23	28.6083	124.384
Post D1	18	0.12	0.1	0.22	24.4815	111.28			D2D13	14	0.12	0.06	0.18	35.377	196.539
Post D1	18	0.13	0.16	0.29	24.0953	83.0872			D2D13	14	0.11	0.1	0.21	35.1866	123.589
Post D1	19	0.13	0.14	0.27	21.9295	81.2204			D2D13	14	0.11	0.1	0.21	23.7932	113.301
Post D1	19	0.13	0.11	0.24	27.1143	112.976			D2D13	14	0.1	0.15	0.25	20.317	96.7475
Post D1	19	0.11	0.08	0.19	24.858	130.832			D2D13	14	0.11	0.09	0.2	19.8663	79.4651
Post D1	19	0.12	0.1	0.22	25.1103	114.138			D2D13	14	0.11	0.1	0.21	25.1592	125.796
Post D1	19	0.1	0.09	0.19	25.4601	134.001			D2D13	17	0.14	0.15	0.29	18.7842	64.7731
Post D1	19	0.1	0.13	0.23	15.4269	67.0733			D2D13	17	0.12	0.17	0.29	21.0241	72.4968
Post D1	19	0.12	0.16	0.28	20.6739	73.8353			D2D13	17	0.15	0.13	0.28	23.5981	84.279
Post D1	19	0.11	0.1	0.21	24.026	114.409			D2D13	17	0.17	0.14	0.31	21.6662	69.8908
Post D1	20	0.1	0.08	0.18	24.4859	136.033			D2D13	17	0.12	0.1	0.22	19.9344	90.6111
Post D1	20	0.1	0.1	0.2	23.3046	116.523			D2D13	17	0.13	0.13	0.26	18.4118	70.8146
Post D1	20	0.11	0.14	0.25	21.9775	87.9098			D2D13	17	0.13	0.15	0.28	19.7502	70.5364
Post D1	20	0.13	0.13	0.26	22.4776	86.4524			D2D13	17	0.16	0.17	0.33	14.2301	43.1214
Post D1	20	0.13	0.11	0.24	22.6683	94.4515			D2D13	17	0.1	0.07	0.17	23.346	137.329
Post D1	20	0.12	0.12	0.24	20.6408	86.0033			D2D13	17	0.15	0.09	0.24	25.5689	106.537
Post D1	20	0.13	0.11	0.24	22.4812	93.6718			D2D13	17	0.11	0.13	0.24	22.2431	92.6794
Post D1	20	0.13	0.09	0.22	21.544	97.9271			D2D13	17	0.14	0.11	0.25	22.4063	89.6253
Post D1	20	0.13	0.12	0.25	23.7423	94.9691			D2D13	18	0.12	0.08	0.2	28.7271	143.635
Post D1	20	0.13	0.13	0.26	21.854	84.0538			D2D13	18	0.12	0.08	0.2	28.2125	141.062
PD2	5	0.12	0.12	0.24	18.5415	77.2562			D2D13	18	0.13	0.08	0.21	29.8891	142.329
PD2	5	0.15	0.16	0.31	22.0539	71.1416			D2D13	18	0.12	0.08	0.2	30.8108	154.054
PD2	5	0.14	0.09	0.23	25.1308	109.264			D2D13	18	0.14	0.16	0.3	20.9838	69.9459
PD2	5	0.12	0.13	0.25	20.0062	80.0249			D2D13	18	0.16	0.16	0.32	23.0464	72.0201
PD2	5	0.13	0.12	0.25	26.2587	105.035			D2D13	18	0.13	0.14	0.27	26.2737	97.3101
PD2	5	0.11	0.18	0.29	13.9307	48.0368			D2D13	18	0.1	0.08	0.18	18.8782	104.879
PD2	5	0.14	0.12	0.26	21.1324	81.2786			D2D13	18	0.14	0.13	0.27	25.5656	94.6876
PD2	5	0.15	0.1	0.25	20.8083	83.2332			D2D13	18	0.12	0.08	0.2	28.2856	141.428
PD2	5	0.13	0.15	0.28	19.5064	69.6656			D2D13	18	0.1	0.06	0.16	28.7972	179.982
PD2	5	0.15	0.13	0.28	24.2284	86.5299			D2D13	18	0.12	0.08	0.2	28.1485	140.743
PD2	5	0.14	0.15	0.29	20.5633	70.9079
PD2	5	0.14	0.14	0.28	20.0644	71.6587
PD2	6	0.16	0.14	0.3	17.0505	56.8349
PD2	6	0.16	0.14	0.3	18.7068	62.356
PD2	6	0.13	0.09	0.22	25.6639	116.654
PD2	6	0.11	0.09	0.2	23.139	115.695
PD2	6	0.11	0.09	0.2	21.8097	109.048
PD2	6	0.1	0.09	0.19	21.5069	113.194
PD2	6	0.12	0.11	0.23	21.1777	92.0768
PD2	6	0.11	0.11	0.22	20.6798	93.999
PD2	6	0.11	0.15	0.26	18.143	69.7808
PD2	6	0.15	0.14	0.29	22.0732	76.1145
PD2	7	0.1	0.1	0.2	21.6842	108.421
PD2	7	0.11	0.11	0.22	21.3672	97.1238
PD2	7	0.12	0.11	0.23	21.7443	94.5403
PD2	7	0.13	0.1	0.23	24.2824	105.576
PD2	7	0.12	0.1	0.22	28.2001	128.182
PD2	7	0.06	0.1	0.16	24.1418	104.964
PD2	7	0.12	0.12	0.24	24.4635	101.931
PD2	7	0.12	0.19	0.31	17.2924	55.7821
PD2	7	0.12	0.15	0.27	18.6877	69.2136
PD2	8	0.12	0.15	0.27	19.5044	72.2384
PD2	8	0.13	0.11	0.24	24.5612	102.338
PD2	8	0.13	0.11	0.24	20.6269	85.9453
PD2	8	0.19	0.14	0.33	19.1856	58.1383
PD2	8	0.12	0.11	0.23	21.0309	91.4389
PD2	8	0.12	0.12	0.24	22.4152	93.3968
PD2	8	0.13	0.14	0.27	17.784	65.8668
PD2	8	0.15	0.15	0.3	19.5666	65.2221
PD2	8	0.13	0.11	0.24	21.0025	87.5105
PD2	8	0.13	0.13	0.26	21.9799	84.5381
PD2	13	0.15	0.19	0.34	22.1639	65.1878
PD2	13	0.13	0.12	0.25	19.7961	79.1845
PD2	13	0.1	0.1	0.2	29.0139	145.07
PD2	13	0.1	0.18	0.28	16.5039	58.9425
PD2	13	0.11	0.12	0.23	21.6463	94.1142
PD2	13	0.15	0.12	0.27	24.9638	92.4584
PD2	13	0.12	0.08	0.2	31.921	159.605
PD2	13	0.12	0.12	0.24	23.7621	99.0086
PD2	13	0.14	0.11	0.25	22.4992	89.997
PD2	13	0.14	0.1	0.24	29.0727	121.136
PD2	14	0.14	0.11	0.25	24.4035	97.6142
PD2	14	0.15	0.11	0.26	20.8131	80.0503
PD2	14	0.13	0.14	0.27	23.8922	88.4898
PD2	14	0.13	0.16	0.29	18.6445	64.2915
PD2	14	0.16	0.16	0.32	19.7829	61.8216
PD2	14	0.16	0.25	0.41	14.2873	34.8472
PD2	14	0.14	0.09	0.23	23.8938	103.886
PD2	14	0.15	0.1	0.25	24.8324	99.3295
PD2	14	0.14	0.17	0.31	19.9831	64.4616
PD2	14	0.13	0.14	0.27	20.4559	75.7625
PD2	14	0.13	0.11	0.24	23.0673	96.1139
PD2	17	0.14	0.15	0.29	21.6777	74.7507
PD2	17	0.15	0.13	0.28	24.9735	89.1911
PD2	17	0.14	0.14	0.28	24.1176	86.1344
PD2	17	0.14	0.12	0.26	24.0622	92.547
PD2	17	0.12	0.09	0.21	20.9514	99.7686
PD2	17	0.14	0.15	0.29	23.2993	80.3425
PD2	17	0.13	0.1	0.23	23.7368	103.204
PD2	17	0.14	0.14	0.28	20.073	71.6891
PD2	17	0.13	0.16	0.29	20.4148	70.3959
PD2	18	0.16	0.19	0.35	21.7763	62.2181
PD2	18	0.16	0.15	0.31	20.3165	65.5372
PD2	18	0.12	0.13	0.25	25.9396	103.759
PD2	18	0.11	0.19	0.3	23.2098	77.3661
PD2	18	0.11	0.12	0.23	27.1079	117.86
PD2	18	0.17	0.13	0.3	24.1598	80.5327
PD2	18	0.11	0.14	0.25	19.7582	79.0329
PD2	18	0.11	0.14	0.25	19.5198	78.0793
PD2	18	0.14	0.13	0.27	25.9534	96.1238
PD2	18	0.13	0.12	0.25	24.0403	96.161
PD2	18	0.14	0.11	0.25	22.9056	91.6225
PD2	18	0.16	0.16	0.32	19.7492	61.7163

## Sheet: Average Speed
Animal ID	Acrylic Control	Sylgard Control			Animal ID	Acrylic Dox	Sylgard Dox
2	68.034	87.115			2	79.493	102.976
3	56.1892	73.1288			3	79.1557	87.4114
4	44.1724	50.7515			4	64.0889	83.8466
5	52.4059	61.302			5	50.4341	100.84
6	64.8706	75.2285			6	61.931	82.5181
7	66.4274	85.56			7	104.541	102.779
8	68.7262	61.6974			8	73.5979	88.3122
9	61.9585	90.8118			9	96.064	95.1668
10	50.3192	71.5714			10	62.7576	72.5528
11	50.6353	52.7397			11	55.482	61.4137
12	64.3397	78.9206			12	83.5365	102.337
13	66.2221	85.0691			13	83.7025	112.63
14	38.1038	65.4795			14	59.7536	98.2064
15	47.3968	58.6324			15	51.2884	65.7762
16	52.5744	74.6135			16	60.4845	100.63
17	45.8889	51.3724			17	48.3882	56.3207
18	45.4665	67.2916			18	73.233	94.7309
19	55.7886	69.4293			19	72.731	87.8653
20	54.8036	70.4294			20	79.7231	66.078
2	58.4229	75.5322			2	79.3537	107.446
3	59.2957	60.5049			3	88.0399	100.595
4	40.3075	58.0366			4	75.0999	96.4531
5	52.8085	61.8678			5	61.0762	70.4387
6	71.6535	61.3474			6	69.0627	80.5534
7	58.7317	84.9642			7	80.1211	102.905
8	52.2469	70.8495			8	69.0576	104.847
9	65.3869	69.1679			9	91.7286	85.8725
10	44.3893	53.1468			10	61.7188	111.678
11	57.1682	47.7757			11	45.5682	58.5153
12	77.1775	74.3899			12	81.7529	112.295
13	63.2026	67.434			13	69.7729	113.537
14	45.4297	66.313			14	64.4912	104.464
15	45.4403	54.923			15	55.3611	59.164
16	49.9598	64.0224			16	64.6509	106.778
17	54.3912	44.0586			17	43.9227	64.3992
18	54.5926	61.7245			18	90.799	98.6781
19	62.2666	71.7307			19	89.265	107.159
20	50.8823	51.031			20	62.6757	82.0446
2	94.4778	85.2317			5	84.9848	97.6097
3	92.632	74.0643			6	109.028	95.5318
4	65.2611	75.4513			7	125.801	107.457
5	74.3193	88.4732			8	117.486	125.745
6	83.6878	79.9572			13	123.166	125.706
7	93.3656	65.8588			14	85.0563	100.947
8	120.71	72.6668			17	77.5738	76.4512
9	98.5004	68.0181			18	103.95	124.267
10	95.4777	84.9625			5	77.9379	91.5791
11	66.1758	60.0836			6	80.6372	110.925
12	117.922	102.214			7	90.0419	103.049
13	98.5256	69.3097			8	81.0403	113.499
14	75.1705	69.9954			13	100.616	145.695
15	71.4344	58.0439			14	59.7646	103.875
16	67.6146	102.787			17	67.8737	87.6122
17	71.8093	67.0943			18	91.9633	136.866
18	93.7336	104.982			5	62.8873	82.112
19	105.04	110.855			6	68.4895	105.236
20	71.6142	87.3837			7	100.9	144.731
5	55.6842	77.0688			8	120.462	125.528
6	92.1254	99.2108			13	116.418	122.93
7	86.8753	92.7518			14	70.5506	120.558
8	64.2969	77.6429			17	84.1605	82.7245
13	87.437	103.8			18	106.546	123.506
14	53.1676	77.5405
17	62.0189	81.3151
18	83.8581	88.2253
	67.0925	73.1531				78.891	98.1348
	18.9731	15.0465				19.8203	20.6327
