# Supplementary material for: Silencing long-descending inter-enlargement propriospinal neurons improves hindlimb stepping after contusive spinal cord injuries
Source: eLife. 2023 Dec 15;12:e82944. doi: 10.7554/eLife.82944 (PMC10776087; doi:10.7554/eLife.82944)
Supplement: Figure 4—source data 1. [file elife-82944-fig4-data1.xlsx]

## Sheet: LAPNS
Time point	Swim Phase		Time point	Swim Phase		Time point	Swim Phase		Time point	Swim Phase		Time point	Swim Phase
BL	0.615385		PD1	0.541667		D1D5	0.541667		D1D8	0.5		Post D1	0.521739
BL	0.583333		PD1	0.541667		D1D5	0.52		D1D8	0.52		Post D1	0.541667
BL	0.576923		PD1	0.5		D1D5	0.52		D1D8	0.52		Post D1	0.521739
BL	0.518519		PD1	0.52		D1D5	0.5		D1D8	0.518519		Post D1	0.541667
BL	0.56		PD1	0.521739		D1D5	0.571429		D1D8	0.64		Post D1	0.5
BL	0.652174		PD1	0.521739		D1D5	0.5		D1D8	0.521739		Post D1	0.5
BL	0.6		PD1	0.541667		D1D5	0.545455		D1D8	0.521739		Post D1	0.521739
BL	0.52		PD1	0.5		D1D5	0.521739		D1D8	0.52		Post D1	0.5
BL	0.541667		PD1	0.5		D1D5	0.521739		D1D8	0.521739		Post D1	0.518519
BL	0.521739		PD1	0.5		D1D5	0.633333		D1D8	0.551724		Post D1	0.5
BL	0.576923		PD1	0.5		D1D5	0.521739		D1D8	0.541667		Post D1	0.5
BL	0.555556		PD1	0.56		D1D5	0.521739		D1D8	0.52		Post D1	0.56
BL	0.592593		PD1	0.518519		D1D5	0.5		D1D8	0.5		Post D1	0.538462
BL	0.62963		PD1	0.541667		D1D5	0.5		D1D8	0.538462		Post D1	0.5
BL	0.538462		PD1	0.5		D1D5	0.5		D1D8	0.571429		Post D1	0.5
BL	0.555556		PD1	0.52		D1D5	0.545455		D1D8	0.541667		Post D1	0.52
BL	0.535714		PD1	0.576923		D1D5	0.521739		D1D8	0.52		Post D1	0.541667
BL	0.555556		PD1	0.52		D1D5	0.521739		D1D8	0.521739		Post D1	0.518519
BL	0.538462		PD1	0.52381		D1D5	0.521739		D1D8	0.541667		Post D1	0.592593
BL	0.619048		PD1	0.55		D1D5	0.565217		D1D8	0.541667		Post D1	0.571429
BL	0.6		PD1	0.545455		D1D5	0.521739		D1D8	0.5		Post D1	0.615385
BL	0.538462		PD1	0.590909		D1D5	0.545455		D1D8	0.521739		Post D1	0.56
BL	0.571429		PD1	0.521739		D1D5	0.586207		D1D8	0.5		Post D1	0.607143
BL	0.576923		PD1	0.590909		D1D5	0.5		D1D8	0.52381		Post D1	0.592593
BL	0.64		PD1	0.521739		D1D5	0.52381		D1D8	0.5		Post D1	0.533333
BL	0.615385		PD1	0.541667		D1D5	0.5		D1D8	0.56		Post D1	0.571429
BL	0.62069		PD1	0.5		D1D5	0.545455		D1D8	0.52381		Post D1	0.607143
BL	0.535714		PD1	0.521739		D1D5	0.590909		D1D8	0.52		Post D1	0.541667
BL	0.52		PD1	0.52		D1D5	0.541667		D1D8	0.583333		Post D1	0.5
BL	0.52		PD1	0.5		D1D5	0.5		D1D8	0.6		Post D1	0.68
BL	0.535714		PD1	0.5		D1D5	0.5		D1D8	0.52		Post D1	0.642857
BL	0.5		PD1	0.565217		D1D5	0.521739		D1D8	0.56		Post D1	0.583333
BL	0.5		PD1	0.521739		D1D5	0.5		D1D8	0.565217		Post D1	0.555556
BL	0.5		PD1	0.541667		D1D5	0.565217		D1D8	0.565217		Post D1	0.518519
BL	0.566667		PD1	0.625		D1D5	0.52		D1D8	0.5		Post D1	0.56
BL	0.535714		PD1	0.5		D1D5	0.538462		D1D8	0.5		Post D1	0.633333
BL	0.517241		PD1	0.52		D1D5	0.571429		D1D8	0.592593		Post D1	0.535714
BL	0.535714		PD1	0.555556		D1D5	0.5		D1D8	0.521739		Post D1	0.580645
BL	0.518519		PD1	0.518519		D1D5	0.533333		D1D8	0.555556		Post D1	0.733333
BL	0.517241		PD1	0.518519		D1D5	0.5		D1D8	0.62069		Post D1	0.875
BL	0.517241		PD1	0.571429		D1D5	0.516129		D1D8	0.576923		Post D1	0.52
BL	0.5		PD1	0.535714		D1D5	0.53125		D1D8	0.52		Post D1	0.535714
BL	0.551724		PD1	0.518519		D1D5	0.551724		D1D8	0.5		Post D1	0.555556
BL	0.5		PD1	0.538462		D1D5	0.592593		D1D8	0.535714		Post D1	0.535714
BL	0.62963		PD1	0.533333		D1D5	0.6		D1D8	0.518519		Post D1	0.518519
BL	0.571429		PD1	0.555556		D1D5	0.571429		D1D8	0.518519		Post D1	0.518519
BL	0.5		PD1	0.518519		D1D5	0.548387		D1D8	0.5		Post D1	0.535714
BL	0.576923		PD1	0.52		D1D5	0.5		D1D8	0.52		Post D1	0.517241
BL	0.541667		PD1	0.555556		D1D5	0.533333		D1D8	0.565217		Post D1	0.535714
BL	0.571429		PD1	0.535714		D1D5	0.535714		D1D8	0.590909		Post D1	0.517241
BL	0.521739		PD1	0.518519		D1D5	0.55		D1D8	0.521739		Post D1	0.533333
BL	0.583333		PD1	0.518519		D1D5	0.52		D1D8	0.541667		Post D1	0.533333
BL	0.576923		PD1	0.535714		D1D5	0.576923		D1D8	0.545455		Post D1	0.551724
BL	0.62963		PD1	0.541667		D1D5	0.655172		D1D8	0.5		Post D1	0.517241
BL	0.565217		PD1	0.5		D1D5	0.68		D1D8	0.521739		Post D1	0.5
BL	0.541667		PD1	0.535714		D1D5	0.6		D1D8	0.521739		Post D1	0.5
BL	0.518519		PD1	0.555556		D1D5	0.576923		D1D8	0.541667		Post D1	0.555556
BL	0.551724		PD1	0.566667		D1D5	0.576923		D1D8	0.5		Post D1	0.580645
BL	0.625		PD1	0.52		D1D5	0.538462		D1D8	0.521739		Post D1	0.518519
BL	0.615385		PD1	0.52		D1D5	0.592593		D1D8	0.541667		Post D1	0.571429
BL	0.5		PD1	0.56		D1D5	0.518519		D1D8	0.5		Post D1	0.555556
BL	0.535714		PD1	0.5		D1D5	0.518519		D1D8	0.52381		Post D1	0.652174
BL	0.551724		PD1	0.566667		D1D5	0.538462		D1D8	0.52381		Post D1	0.538462
BL	0.653846		PD1	0.551724		D1D5	0.555556		D1D8	0.52381		Post D1	0.517241
BL	0.535714		PD1	0.586207		D1D5	0.6		D1D8	0.6		Post D1	0.538462
BL	0.566667		PD1	0.5		D1D5	0.52		D1D8	0.545455		Post D1	0.538462
BL	0.571429		PD1	0.538462		D1D5	0.52		D1D8	0.5		Post D1	0.571429
BL	0.551724		PD1	0.518519		D1D5	0.5		D1D8	0.5		Post D1	0.636364
BL	0.517241		PD1	0.52		D1D5	0.518519		D1D8	0.538462		Post D1	0.655172
BL	0.517241		PD1	0.538462		D1D5	0.517241		D1D8	0.541667		Post D1	0.571429
BL	0.535714		PD1	0.518519		D1D5	0.518519		D1D8	0.52		Post D1	0.592593
BL	0.5625		PD1	0.551724		D1D5	0.576923		D1D8	0.5		Post D1	0.551724
BL	0.548387		PD1	0.5		D1D5	0.56		D1D8	0.551724		Post D1	0.542857
BL	0.516129		PD1	0.52		D1D5	0.541667		D1D8	0.538462		Post D1	0.535714
BL	0.5		PD1	0.538462		D1D5	0.538462		D1D8	0.676471		Post D1	0.5
BL	0.5		PD1	0.518519		D1D5	0.5		D1D8	0.52		Post D1	0.52
BL	0.551724		PD1	0.52		D1D5	0.56		D1D8	0.538462		Post D1	0.5
BL	0.586207		PD1	0.5		D1D5	0.52		D1D8	0.583333		Post D1	0.5
BL	0.566667		PD1	0.5		D1D5	0.592593		D1D8	0.52		Post D1	0.5
BL	0.533333		PD1	0.5		D1D5	0.608696		D1D8	0.5		Post D1	0.52
BL	0.53125		PD1	0.5		D1D5	0.555556		D1D8	0.541667		Post D1	0.52
BL	0.6		PD1	0.5		D1D5	0.5		D1D8	0.541667		Post D1	0.52
BL	0.548387		PD1	0.5		D1D5	0.555556		D1D8	0.5		Post D1	0.5
BL	0.566667		PD1	0.5		D1D5	0.538462		D1D8	0.538462		Post D1	0.5
BL	0.566667		PD1	0.535714		D1D5	0.538462		D1D8	0.5		Post D1	0.52
BL	0.541667		PD1	0.571429		D1D5	0.555556		D1D8	0.565217		Post D1	0.538462
BL	0.521739		PD1	0.548387		D1D5	0.518519		D1D8	0.607143		Post D1	0.551724
BL	0.52		PD1	0.517241		D1D5	0.535714		D1D8	0.583333		Post D1	0.535714
BL	0.52		PD1	0.555556		D1D5	0.571429		D1D8	0.555556		Post D1	0.538462
BL	0.541667		PD1	0.545455		D1D5	0.5		D1D8	0.608696		Post D1	0.518519
BL	0.6		PD1	0.565217		D1D5	0.535714		D1D8	0.52381		Post D1	0.52
BL	0.576923		PD1	0.5		D1D5	0.518519		D1D8	0.68		Post D1	0.535714
BL	0.538462		PD1	0.545455		D1D5	0.518519		D1D8	0.642857		Post D1	0.565217
BL	0.5		PD1	0.541667		D1D5	0.535714		D1D8	0.583333		Post D1	0.565217
BL	0.615385		PD1			D1D5	0.571429		D1D8	0.636364		Post D1	0.56
BL	0.571429		PD1	0.565217		D1D5	0.565217		D1D8	0.606061		Post D1	0.565217
BL	0.56		PD1	0.5		D1D5	0.56		D1D8	0.545455		Post D1	0.5
BL	0.538462		PD1	0.545455		D1D5	0.6		D1D8	0.608696		Post D1	0.538462
BL	0.576923		PD1	0.521739		D1D5	0.62963		D1D8	0.590909		Post D1	0.545455
BL	0.56		PD1	0.541667		D1D5	0.590909		D1D8	0.583333		Post D1	0.545455
BL	0.576923		PD1	0.521739		D1D5	0.545455		D1D8	0.636364		Post D1	0.5
BL	0.538462		PD1	0.541667		D1D5	0.521739		D1D8	0.545455		Post D1	0.541667
BL	0.555556		PD1	0.521739		D1D5	0.545455		D1D8	0.571429		Post D1	0.5
BL	0.538462		PD1	0.565217		D1D5	0.555556		D1D8	0.571429		Post D1	0.5
BL	0.541667		PD1	0.521739		D1D5	0.52381		D1D8	0.521739		Post D1	0.5
BL	0.535714		PD1	0.521739		D1D5	0.52381		D1D8	0.565217		Post D1	0.521739
BL	0.533333		PD1	0.5		D1D5	0.521739		D1D8	0.5		Post D1	0.56
BL	0.538462		PD1	0.521739		D1D5	0.521739		D1D8	0.571429		Post D1	0.565217
BL	0.538462		PD1	0.5		D1D5	0.606061		D1D8	0.518519		Post D1	0.5
BL	0.517241		PD1	0.580645		D1D5	0.590909		D1D8	0.538462		Post D1	0.521739
BL	0.538462		PD1	0.5		D1D5	0.5		D1D8	0.62069		Post D1	0.5
BL	0.555556		PD1	0.535714		D1D5	0.521739		D1D8	0.518519		Post D1	0.571429
BL	0.517241		PD1	0.517241		D1D5	0.521739		D1D8	0.535714		Post D1	0.535714
BL	0.5		PD1	0.551724		D1D5	0.521739		D1D8	0.535714		Post D1	0.517241
BL	0.518519		PD1	0.5625		D1D5	0.541667		D1D8	0.628571		Post D1	0.517241
BL	0.586207		PD1	0.5		D1D5	0.678571		D1D8	0.59375		Post D1	0.5625
BL	0.571429		PD1	0.5		D1D5	0.535714		D1D8	0.571429		Post D1	0.533333
BL	0.592593		PD1	0.538462		D1D5	0.535714		D1D8	0.518519		Post D1	0.571429
BL	0.5		PD1	0.5		D1D5	0.566667		D1D8	0.517241		Post D1	0.5
BL	0.517241		PD1	0.521739		D1D5	0.52		D1D8	0.516129		Post D1	0.517241
BL	0.571429		PD1	0.52		D1D5	0.518519		D1D8	0.551724		Post D1	0.535714
BL	0.655172		PD1	0.5		D1D5	0.5		D1D8	0.518519		Post D1	0.551724
BL	0.571429		PD1	0.517241		D1D5	0.518519		D1D8	0.5		Post D1	0.551724
BL	0.555556		PD1	0.555556		D1D5	0.535714		D1D8	0.551724		Post D1	0.580645
BL	0.517241		PD1	0.518519		D1D5	0.518519		D1D8	0.533333		Post D1	0.551724
BL	0.59375		PD1	0.551724		D1D5	0.5		D1D8	0.533333		Post D1	0.533333
BL	0.517241		PD1	0.518519		D1D5	0.518519		D1D8	0.53125		Post D1	0.53125
BL	0.586207		PD1	0.571429		D1D5	0.545455		D1D8	0.566667		Post D1	0.5
BL	0.548387		PD1	0.571429		D1D5	0.5		D1D8	0.527778		Post D1	0.517241
BL	0.566667		PD1	0.607143		D1D5	0.5		D1D8	0.5		Post D1	0.517241
BL	0.540541		PD1	0.576923		D1D5	0.535714		D1D8	0.538462		Post D1	0.533333
BL	0.606061		PD1	0.6		D1D5	0.535714		D1D8	0.516129		Post D1	0.533333
BL	0.516129		PD1	0.585385		D1D5	0.517241		D1D8	0.533333		Post D1	0.535714
BL	0.6		PD1	0.586207		D1D5	0.517241		D1D8	0.535714		Post D1	0.517241
BL	0.555556		PD1	0.551724		D1D5	0.5		D1D8	0.538462		Post D1	0.518519
BL	0.666667		PD1	0.535714		D1D5	0.571429		D1D8	0.533333		Post D1	0.538462
BL	0.75		PD1	0.558824		D1D5	0.625		D1D8	0.551724		Post D1	0.535714
BL	0.52381		PD1	0.528705		D1D5	0.548387		D1D8	0.571429		Post D1	0.535714
BL	0.583333		PD1	0.571429		D1D5	0.516129		D1D8	0.576923		Post D1	0.518519
BL	0.583333		PD1	0.555556		D1D5	0.535714		D1D8	0.52381		Post D1	0.518519
BL	0.681818		PD1	0.517241		D1D5	0.513514		D1D8	0.571429		Post D1	0.517241
BL	0.730769		PD1	0.535714		D1D5	0.520371		D1D8	0.55		Post D1	0.5
BL	0.521739		PD1	0.544985		D1D5	0.571429		D1D8	0.545455		Post D1	0.5
BL	0.5		PD1	0.555556		D1D5	0.533333		D1D8	0.52381		Post D1	0.5
BL	0.521739		PD1	0.535714		D1D5	0.551724		D1D8	0.52381		Post D1	0.566667
BL	0.56		PD1	0.5		D1D5	0.5		D1D8	0.565217		Post D1	0.580645
BL	0.517241		PD1	0.545455		D1D5	0.539122		D1D8	0.5		Post D1	0.566667
BL	0.545455		PD1	0.526316		D1D5	0.625		D1D8	0.52381		Post D1	0.571429
BL	0.565217		PD1	0.526316		D1D5	0.538462		D1D8	0.521739		Post D1	0.5
BL	0.545455		PD1	0.5		D1D5	0.518519		D1D8	0.521739		Post D1	0.551724
BL	0.52		PD1	0.5		D1D5	0.533333		D1D8	0.545455		Post D1	0.535714
BL	0.545455		PD1	0.52381		D1D5	0.590909		D1D8	0.545455		Post D1	0.59375
BL	0.565217		PD1	0.526316		D1D5	0.565217		D1D8	0.52		Post D1	0.592593
BL	0.565217		PD1	0.521739		D1D5	0.521739		D1D8	0.5		Post D1	0.538462
BL	0.521739		PD1	0.521739		D1D5	0.5		D1D8	0.5		Post D1	0.517241
BL	0.521739		PD1	0.607143		D1D5	0.607143		D1D8	0.545455		Post D1	0.521739
BL	0.708333		PD1	0.571429		D1D5	0.5		D1D8	0.541667		Post D1	0.521739
BL	0.518519		PD1	0.52381		D1D5	0.5		D1D8	0.541667		Post D1	0.545455
BL	0.535714		PD1	0.5		D1D5	0.5		D1D8	0.521739		Post D1	0.5
BL	0.52		PD1	0.5		D1D5	0.5		D1D8	0.52		Post D1	0.521739
BL	0.5		PD1	0.52381		D1D5	0.52381		D1D8	0.521739		Post D1	0.52
BL	0.517241		PD1	0.5		D1D5	0.545455		D1D8	0.52		Post D1	0.538462
BL	0.586207		PD1	0.5		D1D5	0.521739		D1D8	0.518519		Post D1	0.52
BL	0.586207		PD1	0.565217		D1D5	0.521739		D1D8	0.555556		Post D1	0.521739
BL	0.5		PD1	0.517241		D1D5	0.518519		D1D8	0.607143		Post D1	0.5
BL	0.555556		PD1	0.538462		D1D5	0.5		D1D8	0.517241		Post D1	0.52
BL	0.566667		PD1	0.615385		D1D5	0.55		D1D8	0.538462		Post D1	0.52
BL	0.586207		PD1	0.6		D1D5	0.565217		D1D8	0.5		Post D1	0.538462
BL	0.566667		PD1	0.6		D1D5	0.5		D1D8	0.538462		Post D1	0.56
BL	0.56		PD1	0.6		D1D5	0.571429		D1D8	0.541667		Post D1	0.565217
BL	0.518519		PD1	0.521739		D1D5	0.555556		D1D8	0.52		Post D1	0.565217
BL	0.612903		PD1	0.521739		D1D5	0.535714		D1D8	0.5		Post D1	0.52
BL	0.517241		PD1	0.52		D1D5	0.566667		D1D8	0.52		Post D1	0.518519
BL	0.52		PD1	0.5		D1D5	0.535714		D1D8	0.52		Post D1	0.576923
BL	0.5		PD1	0.533333		D1D5	0.56		D1D8	0.5		Post D1	0.583333
BL	0.5		PD1	0.521739		D1D5	0.52		D1D8	0.52		Post D1	0.541667
BL	0.551724		PD1	0.5		D1D5	0.538462		D1D8	0.518519		Post D1	0.52
BL	0.53125		PD1	0.5		D1D5	0.576923		D1D8	0.538462		Post D1	0.545455
BL	0.533333		PD1	0.5		D1D5	0.518519		D1D8	0.518519		Post D1	0.545455
BL	0.555556		PD1	0.6		D1D5	0.615385		D1D8	0.565217		Post D1	0.52
BL	0.6		PD1	0.583333		D1D5	0.6		D1D8	0.551724		Post D1	0.52
BL	0.515152		PD1	0.555556		D1D5	0.518519		D1D8	0.62		Post D1	0.56
BL	0.59375		PD1	0.518519		D1D5	0.538462		D1D8	0.56		Post D1	0.521739
BL	0.62963		PD1	0.555556		D1D5	0.5		D1D8	0.518519		Post D1	0.565217
BL	0.5625		PD1	0.5		D1D5	0.565217		D1D8	0.583333		Post D1	0.5
BL	0.538462		PD1	0.521739		D1D5	0.517241		D1D8	0.555556		Post D1	0.625
BL	0.551724		PD1	0.52		D1D5	0.517241		D1D8	0.571429		Post D1	0.52
BL	0.666667		PD1	0.538462		D1D5	0.566667		D1D8	0.5		Post D1	0.56
BL	0.538462		PD1	0.56		D1D5	0.548387		D1D8	0.5		Post D1	0.5
BL	0.5		PD1	0.583333		D1D5	0.576923		D1D8	0.56		Post D1	0.615385
BL	0.62069		PD1	0.576923		D1D5	0.551724		D1D8	0.551724		Post D1	0.538462
BL	0.592593		PD1	0.594595		D1D5	0.538462		D1D8	0.555556		Post D1	0.535714
BL	0.535714		PD1	0.52		D1D5	0.535714		D1D8	0.541667		Post D1	0.555556
BL	0.551724		PD1	0.56		D1D5	0.517241		D1D8	0.5		Post D1	0.52
BL	0.586207		PD1	0.566667		D1D5	0.5		D1D8	0.56		Post D1	0.612903
BL	0.571429		PD1	0.5		D1D5	0.518519		D1D8	0.541667		Post D1	0.548387
BL	0.566667		PD1	0.607143		D1D5	0.538462		D1D8	0.5		Post D1	0.516129
BL	0.666667		PD1	0.555556		D1D5	0.5		D1D8	0.521739		Post D1	0.527778
BL	0.65625		PD1	0.555556		D1D5	0.52		D1D8	0.541667		Post D1	0.5
BL	0.571429		PD1	0.566667		D1D5	0.518519		D1D8	0.541667		Post D1	0.5
BL	0.5		PD1	0.571429		D1D5	0.586207		D1D8	0.5		Post D1	0.535714
BL	0.535714		PD1	0.5		D1D5	0.555556		D1D8	0.52		Post D1	0.566667
BL	0.555556		PD1	0.521739		D1D5	0.555556		D1D8	0.52		Post D1	0.580645
BL	0.5		PD1	0.518519		D1D5	0.518519		D1D8	0.52		Post D1	0.538462
BL	0.518519		PD1	0.56		D1D5	0.533333		D1D8	0.576923		Post D1	0.551724
BL	0.5		PD1	0.68		D1D5	0.583333		D1D8	0.555556		Post D1	0.517241
BL	0.576923		PD1	0.5		D1D5	0.56		D1D8	0.518519		Post D1	0.558824
BL	0.583333		PD1	0.545455		D1D5	0.5		D1D8	0.538462		Post D1	0.517241
BL	0.565217		PD1	0.541667		D1D5	0.5		D1D8	0.541667		Post D1	0.5
BL	0.541667		PD1	0.5		D1D5	0.538462		D1D8	0.521739		Post D1	0.53125
BL	0.52		PD1	0.5		D1D5	0.541667		D1D8	0.5		Post D1	0.5
BL	0.541667		PD1	0.5		D1D5	0.5		D1D8	0.5		Post D1	0.518519
BL	0.538462		PD1	0.52		D1D5	0.521739		D1D8	0.571429		Post D1	0.5
BL	0.62069		PD1	0.538462		D1D5	0.521739		D1D8	0.555556		Post D1	0.538462
BL	0.56		PD1	0.545455		D1D5	0.5		D1D8	0.521739		Post D1	0.576923
BL	0.5		PD1	0.565217		D1D5	0.8125		D1D8	0.545455		Post D1	0.5
BL	0.52		PD1	0.545455		D1D5	0.684211		D1D8	0.541667		Post D1	0.571429
BL	0.5		PD1	0.521739		D1D5	0.565217		D1D8	0.5		Post D1	0.571429
BL	0.612903		PD1	0.52		D1D5	0.55		D1D8	0.5		Post D1	0.576923
BL	0.518519		PD1	0.56		D1D5	0.521739		D1D8	0.5		Post D1	0.541667
BL	0.606061		PD1	0.64		D1D5	0.521739		D1D8	0.521739		Post D1	0.52
BL	0.565217		PD1	0.52		D1D5	0.5		D1D8	0.576923		Post D1	0.555556
BL	0.5625		PD1	0.52		D1D5	0.521739		D1D8	0.5		Post D1	0.535714
BL	0.565217		PD1	0.52		D1D5	0.5		D1D8	0.52		Post D1	0.538462
BL	0.5		PD1	0.5		D1D5	0.52		D1D8	0.541667		Post D1	0.52
BL	0.521739		PD1	0.5		D1D5	0.52381		D1D8	0.565217		Post D1	0.52
BL	0.571429		PD1	0.52		D1D5	0.521739		D1D8	0.541667		Post D1	0.571429
BL	0.52381		PD1	0.52381		D1D5	0.52381		D1D8	0.541667		Post D1	0.571429
BL	0.545455		PD1	0.521739		D1D5	0.545455		D1D8	0.583333		Post D1	0.52
BL	0.56		PD1	0.5		D1D5	0.545455		D1D8	0.538462		Post D1	0.535714
BL	0.5		PD1	0.541667		D1D5	0.545455		D1D8	0.5		Post D1	0.5
BL	0.52381		PD1	0.571429		D1D5	0.541667		D1D8	0.52381		Post D1	0.56
BL	0.52381		PD1	0.521739		D1D5	0.52		D1D8	0.521739		Post D1	0.5
BL	0.5		PD1	0.541667		D1D5	0.5		D1D8	0.521739		Post D1	0.521739
BL	0.545455		PD1	0.565217		D1D5	0.538462		D1D8	0.52381		Post D1	0.52
BL	0.521739		PD1	0.518519		D1D5	0.5		D1D8	0.521739		Post D1	0.586207
BL	0.5		PD1	0.5		D1D5	0.521739		D1D8	0.5		Post D1	0.571429
BL	0.565217		PD1	0.5		D1D5	0.521739		D1D8	0.521739		Post D1	0.5
BL	0.521739		PD1	0.545455		D1D5	0.52		D1D8	0.521739		Post D1	0.52
BL	0.55		PD1	0.541667		D1D5	0.518519		D1D8	0.52381		Post D1	0.518519
BL	0.545455		PD1	0.521739		D1D5	0.565217		D1D8	0.5		Post D1	0.52
BL	0.5		PD1	0.5		D1D5	0.541667		D1D8	0.571429		Post D1	0.541667
BL	0.633333		PD1	0.52		D1D5	0.545455		D1D8	0.545455		Post D1	0.576923
BL	0.53125		PD1	0.56		D1D5	0.5		D1D8	0.5		Post D1	0.52
BL	0.517241		PD1	0.5		D1D5	0.535714		D1D8	0.521739		Post D1	0.538462
BL	0.516129		PD1	0.5		D1D5	0.5		D1D8	0.5		Post D1	0.52
BL	0.5		PD1	0.6		D1D5	0.5		D1D8	0.541667		Post D1	0.52
BL	0.535714		PD1	0.545455		D1D5	0.52		D1D8	0.652174		Post D1	0.545455
BL	0.516129		PD1	0.5		D1D5	0.541667		D1D8	0.571429		Post D1	0.521739
BL	0.5		PD1	0.521739		D1D5	0.571429		D1D8	0.518519		Post D1	0.52
BL	0.533333		PD1	0.521739		D1D5	0.521739		D1D8	0.5		Post D1	0.52
BL	0.551724		PD1	0.52		D1D5	0.541667		D1D8	0.5		Post D1	0.52
BL	0.551724		PD1	0.5		D1D5	0.521739		D1D8	0.583333		Post D1	0.5
BL	0.533333		PD1	0.52381		D1D5	0.521739		D1D8	0.541667		Post D1	0.5
BL	0.5		PD1	0.52381		D1D5	0.52		D1D8	0.535714		Post D1	0.541667
BL	0.551724		PD1	0.521739		D1D5	0.5		D1D8	0.566667		Post D1	0.52
BL	0.53125		PD1	0.56		D1D5	0.521739		D1D8	0.607143		Post D1	0.5
BL	0.533333		PD1	0.590909		D1D5	0.521739		D1D8	0.545455		Post D1	0.5
BL	0.555556		PD1	0.521739		D1D5	0.521739		D1D8	0.52		Post D1	0.5
BL	0.6		PD1	0.52		D1D5	0.52		D1D8	0.538462		Post D1	0.56
BL	0.592593		PD1	0.52		D1D5	0.52		D1D8	0.5		Post D1	0.52
BL	0.642857		PD1	0.5625		D1D5	0.52		D1D8	0.52		Post D1	0.565217
BL	0.5		PD1	0.541667		D1D5	0.521739		D1D8	0.575758		Post D1	0.541667
BL	0.555556		PD1	0.565217		D1D5	0.52		D1D8	0.6		Post D1	0.52
BL	0.538462		PD1	0.56		D1D5	0.538462		D1D8	0.5625		Post D1	0.5
BL	0.571429		PD1	0.612903		D1D5	0.521739		D1D8	0.5		Post D1	0.52
BL	0.5		PD1	0.583333		D1D5	0.6		D1D8	0.56		Post D1	0.571429
BL	0.555556		PD1	0.52381		D1D5	0.576923		D1D8	0.551724		Post D1	0.535714
BL	0.5		PD1	0.5		D1D5	0.7		D1D8	0.5		Post D1	0.517241
BL	0.606061		PD1	0.5		D1D5	0.5		D1D8	0.517241		Post D1	0.517241
BL	0.606061		PD1	0.576923		D1D5	0.52		D1D8	0.535714		Post D1	0.5625
BL	0.5		PD1	0.56		D1D5	0.5		D1D8	0.518519		Post D1	0.533333
BL	0.5		PD1	0.56		D1D5	0.52		D1D8	0.517241		Post D1	0.571429
BL	0.551724		PD1	0.535714		D1D5	0.5		D1D8	0.5		Post D1	0.5
BL	0.535714		PD1	0.517241		D1D5	0.545455		D1D8	0.518519		Post D1	0.517241
			PD1	0.5		D1D5	0.52381		D1D8	0.517241		Post D1	0.535714
			PD1	0.533333		D1D5	0.521739		D1D8	0.518519		Post D1	0.551724
			PD1	0.548387		D1D5	0.541667		D1D8	0.5		Post D1	0.551724
			PD1	0.657143		D1D5	0.52					Post D1	0.580645
			PD1	0.52		D1D5	0.52					Post D1	0.551724
			PD1	0.633333		D1D5	0.521739					Post D1	0.533333
			PD1	0.518519		D1D5	0.521739					Post D1	0.53125
			PD1	0.517241		D1D5	0.518519					Post D1	0.5
			PD1	0.533333		D1D5	0.548387					Post D1	0.517241
			PD1	0.533333		D1D5	0.517241					Post D1	0.517241
			PD1	0.555556		D1D5	0.551724					Post D1	0.533333
			PD1	0.538462		D1D5	0.548387					Post D1	0.533333
			PD1	0.518519		D1D5	0.575758					Post D1	0.535714
			PD1	0.518519		D1D5	0.548387					Post D1	0.517241
			PD1	0.535714		D1D5	0.515152					Post D1	0.6
			PD1	0.518519		D1D5	0.551724					Post D1	0.512821
			PD1	0.535714		D1D5	0.555556					Post D1	0.555556
			PD1	0.518519		D1D5	0.517241					Post D1	0.580645
			PD1	0.518519		D1D5	0.518519					Post D1	0.533333
			PD1	0.551724		D1D5	0.5					Post D1	0.645161
						D1D5	0.517241					Post D1	0.69697
						D1D5	0.5					Post D1	0.612903
						D1D5	0.535714					Post D1	0.612903
						D1D5	0.5					Post D1	0.65625
						D1D5	0.535714					Post D1	0.586207
						D1D5	0.5					Post D1	0.548387
						D1D5	0.516129					Post D1	0.586207
												Post D1	0.571429
												Post D1	0.580645
												Post D1	0.62069
												Post D1	0.571429
												Post D1	0.612903
												Post D1	0.566667
												Post D1	0.586207
												Post D1	0.5625
Average	0.553554		Average	0.53583		Average	0.538287		Average	0.539015		Average	0.542825
St. Deviation	0.0434137		St. Deviation	0.0314698		St. Deviation	0.0377179		St. Deviation	0.0342347		St. Deviation	0.0412359
Total Number Steps	275		Total Number Steps	294		Total Number Steps	302		Total Number Steps	278		Total Number Steps	310
# of steps outside 2 S.D.	18		# of steps outside 2 S.D.	4		# of steps outside 2 S.D.	8		# of steps outside 2 S.D.	8		# of steps outside 2 S.D.	11

## Sheet: LDPN
Time point	Swim Phase		Time point	Swim Phase		Time point	Swim Phase		Time point	Swim Phase		Time point	Swim Phase
BL	0.518		PD1	0.52		D1D5	0.5		D1D8	0.571		Post D1	0.516
BL	0.545		PD1	0.538		D1D5	0.536		D1D8	0.538		Post D1	0.552
BL	0.6		PD1	0.52		D1D5	0.548		D1D8	0.519		Post D1	0.548
BL	0.556		PD1	0.538		D1D5	0.519		D1D8	0.548		Post D1	0.536
BL	0.517		PD1	0.52		D1D5	0.5		D1D8	0.52		Post D1	0.536
BL	0.558		PD1	0.538		D1D5	0.5		D1D8	0.52		Post D1	0.545
BL	0.517		PD1	0.519		D1D5	0.5		D1D8	0.519		Post D1	0.517
BL	0.545		PD1	0.538		D1D5	0.517		D1D8	0.586		Post D1	0.533
BL	0.75		PD1	0.536		D1D5	0.519		D1D8	0.567		Post D1	0.552
BL	0.635		PD1	0.56		D1D5	0.5		D1D8	0.519		Post D1	0.522
BL	0.58		PD1	0.522		D1D5	0.524		D1D8	0.538		Post D1	0.5
BL	0.6		PD1	0.542		D1D5	0.522		D1D8	0.5		Post D1	0.577
BL	0.646		PD1	0.542		D1D5	0.571		D1D8	0.52		Post D1	0.519
BL	0.627		PD1	0.52		D1D5	0.52		D1D8	0.52		Post D1	0.52
BL	0.63		PD1	0.538		D1D5	0.565		D1D8	0.538		Post D1	0.536
BL	0.617		PD1	0.577		D1D5	0.583		D1D8	0.538		Post D1	0.567
BL	0.571		PD1	0.56		D1D5	0.542		D1D8	0.593		Post D1	0.52
BL	0.538		PD1	0.538		D1D5	0.5		D1D8	0.52		Post D1	0.52
BL	0.54		PD1	0.538		D1D5	0.52		D1D8	0.56		Post D1	0.5
BL	0.553		PD1	0.556		D1D5	0.522		D1D8	0.577		Post D1	0.533
BL	0.51		PD1	0.52		D1D5	0.5		D1D8	0.6		Post D1	0.571
BL	0.585		PD1	0.519		D1D5	0.552		D1D8	0.5		Post D1	0.536
BL	0.554		PD1	0.5		D1D5	0.5		D1D8	0.52		Post D1	0.5
BL	0.585		PD1	0.538		D1D5	0.583		D1D8	0.56		Post D1	0.519
BL	0.56		PD1	0.556		D1D5	0.538		D1D8	0.538		Post D1	0.517
BL	0.5		PD1	0.52		D1D5	0.542		D1D8	0.542		Post D1	0.567
BL	0.519		PD1	0.5		D1D5	0.522		D1D8	0.52		Post D1	0.5
BL	0.51		PD1	0.5		D1D5	0.52		D1D8	0.52		Post D1	0.52
BL	0.574		PD1	0.5		D1D5	0.56		D1D8	0.542		Post D1	0.556
BL	0.582		PD1	0.542		D1D5	0.5		D1D8	0.56		Post D1	0.56
BL	0.564		PD1	0.52		D1D5	0.5		D1D8	0.556		Post D1	0.52
BL	0.54		PD1	0.545		D1D5	0.542		D1D8	0.542		Post D1	0.538
BL	0.528		PD1	0.52		D1D5	0.545		D1D8	0.593		Post D1	0.538
BL	0.537		PD1	0.522		D1D5	0.609		D1D8	0.52		Post D1	0.542
BL	0.55		PD1	0.52		D1D5	0.583		D1D8	0.5		Post D1	0.52
BL	0.512		PD1	0.542		D1D5	0.609		D1D8	0.636		Post D1	0.5
BL	0.523		PD1	0.542		D1D5	0.522		D1D8	0.632		Post D1	0.542
BL	0.595		PD1	0.52		D1D5	0.524		D1D8	0.5		Post D1	0.538
BL	0.628		PD1	0.5		D1D5	0.522		D1D8	0.52		Post D1	0.577
BL	0.512		PD1	0.52		D1D5	0.625		D1D8	0.571		Post D1	0.545
BL	0.525		PD1	0.5		D1D5	0.591		D1D8	0.556		Post D1	0.526
BL	0.548		PD1	0.5		D1D5	0.591		D1D8	0.52		Post D1	0.526
BL	0.548		PD1	0.524		D1D5	0.565		D1D8	0.565		Post D1	0.55
BL	0.532		PD1	0.5		D1D5	0.5		D1D8	0.5		Post D1	0.524
BL	0.511		PD1	0.5		D1D5	0.52		D1D8	0.538		Post D1	0.524
BL	0.521		PD1	0.526		D1D5	0.52		D1D8	0.556		Post D1	0.5
BL	0.583		PD1	0.524		D1D5	0.542		D1D8	0.56		Post D1	0.524
BL	0.512		PD1	0.526		D1D5	0.56		D1D8	0.5		Post D1	0.55
BL	0.532		PD1	0.55		D1D5	0.542		D1D8	0.5		Post D1	0.579
BL	0.511		PD1	0.526		D1D5	0.5		D1D8	0.52		Post D1	0.5
BL	0.5		PD1	0.5		D1D5	0.522		D1D8	0.529		Post D1	0.524
BL	0.533		PD1	0.5		D1D5	0.577		D1D8	0.5		Post D1	0.5
BL	0.51		PD1	0.6		D1D5	0.522		D1D8	0.526		Post D1	0.522
BL	0.511		PD1	0.565		D1D5	0.565		D1D8	0.5		Post D1	0.545
BL	0.521		PD1	0.545		D1D5	0.545		D1D8	0.526		Post D1	0.522
BL	0.52		PD1	0.565		D1D5	0.63		D1D8	0.545		Post D1	0.545
BL	0.5		PD1	0.56		D1D5	0.5		D1D8	0.571		Post D1	0.6
BL	0.543		PD1	0.522		D1D5	0.526		D1D8	0.545		Post D1	0.542
BL	0.533		PD1	0.545		D1D5	0.5		D1D8	0.565		Post D1	0.522
BL	0.522		PD1	0.542		D1D5	0.571		D1D8	0.524		Post D1	0.56
BL	0.522		PD1	0.565		D1D5	0.524		D1D8	0.524		Post D1	0.583
BL	0.551		PD1	0.52		D1D5	0.545		D1D8	0.524		Post D1	0.538
BL	0.509		PD1	0.52		D1D5	0.6		D1D8	0.55		Post D1	0.522
BL	0.517		PD1	0.6		D1D5	0.545		D1D8	0.571		Post D1	0.542
BL	0.517		PD1	0.609		D1D5	0.6		D1D8	0.565		Post D1	0.542
BL	0.563		PD1	0.56		D1D5	0.5		D1D8	0.545		Post D1	0.538
BL	0.537		PD1	0.524		D1D5	0.5		D1D8	0.565		Post D1	0.524
BL	0.517		PD1	0.5		D1D5	0.5		D1D8	0.545		Post D1	0.545
BL	0.508		PD1	0.522		D1D5	0.545		D1D8	0.545		Post D1	0.542
BL	0.508		PD1	0.5		D1D5	0.625		D1D8	0.545		Post D1	0.522
BL	0.515		PD1	0.591		D1D5	0.522		D1D8	0.5		Post D1	0.545
BL	0.537		PD1	0.565		D1D5	0.522		D1D8	0.52		Post D1	0.583
BL	0.51		PD1	0.524		D1D5	0.522		D1D8	0.522		Post D1	0.583
BL	0.511		PD1	0.5		D1D5	0.591		D1D8	0.565		Post D1	0.586
BL	0.549		PD1	0.524		D1D5	0.545		D1D8	0.542		Post D1	0.519
BL	0.517		PD1	0.524		D1D5	0.565		D1D8	0.522		Post D1	0.536
BL	0.535		PD1	0.571		D1D5	0.522		D1D8	0.5		Post D1	0.536
BL	0.533		PD1	0.522		D1D5	0.5		D1D8	0.545		Post D1	0.52
BL	0.522		PD1	0.542		D1D5	0.583		D1D8	0.542		Post D1	0.519
BL	0.51		PD1	0.52		D1D5	0.516		D1D8	0.542		Post D1	0.517
BL	0.511		PD1	0.5		D1D5	0.533		D1D8	0.542		Post D1	0.533
BL	0.565		PD1	0.577		D1D5	0.516		D1D8	0.565		Post D1	0.56
BL	0.553		PD1	0.583		D1D5	0.5		D1D8	0.5		Post D1	0.538
BL	0.549		PD1	0.5		D1D5	0.5		D1D8	0.522		Post D1	0.56
BL	0.529		PD1	0.538		D1D5	0.5		D1D8	0.522		Post D1	0.556
BL	0.5		PD1	0.5		D1D5	0.5		D1D8	0.522		Post D1	0.538
BL	0.531		PD1	0.519		D1D5	0.5		D1D8	0.522		Post D1	0.538
BL	0.521		PD1	0.52		D1D5	0.517		D1D8	0.522		Post D1	0.538
BL	0.618		PD1	0.519		D1D5	0.583		D1D8	0.519		Post D1	0.56
BL	0.525		PD1	0.56		D1D5	0.522		D1D8	0.5		Post D1	0.538
BL	0.55		PD1	0.522		D1D5	0.5		D1D8	0.52		Post D1	0.56
BL	0.583		PD1	0.542		D1D5	0.545		D1D8	0.5		Post D1	0.542
BL	0.544		PD1	0.522		D1D5	0.545		D1D8	0.516		Post D1	0.571
BL	0.547		PD1	0.52		D1D5	0.542		D1D8	0.533		Post D1	0.571
BL	0.561		PD1	0.583		D1D5	0.542		D1D8	0.533		Post D1	0.556
BL	0.526		PD1	0.6		D1D5	0.565		D1D8	0.5		Post D1	0.517
BL	0.534		PD1	0.5		D1D5	0.542		D1D8	0.548		Post D1	0.538
BL	0.51		PD1	0.52		D1D5	0.52		D1D8	0.542		Post D1	0.5
BL	0.519		PD1	0.538		D1D5	0.522		D1D8	0.5		Post D1	0.533
BL	0.536		PD1	0.538		D1D5	0.542		D1D8	0.5		Post D1	0.6
BL	0.538		PD1	0.538		D1D5	0.545		D1D8	0.56		Post D1	0.583
BL	0.566		PD1	0.538		D1D5	0.5		D1D8	0.563		Post D1	0.538
BL	0.623		PD1	0.52		D1D5	0.522		D1D8	0.556		Post D1	0.542
BL	0.574		PD1	0.5		D1D5	0.5		D1D8	0.524		Post D1	0.542
BL	0.529		PD1	0.52		D1D5	0.524		D1D8	0.5		Post D1	0.519
BL	0.549		PD1	0.5		D1D5	0.5		D1D8	0.519		Post D1	0.536
BL	0.529		PD1	0.556		D1D5	0.522		D1D8	0.522		Post D1	0.519
BL	0.5		PD1	0.577		D1D5	0.565		D1D8	0.556		Post D1	0.52
BL	0.549		PD1	0.56		D1D5	0.565		D1D8	0.63		Post D1	0.536
BL	0.509		PD1	0.533		D1D5	0.545		D1D8	0.5		Post D1	0.517
BL	0.54		PD1	0.5		D1D5	0.5		D1D8	0.52		Post D1	0.519
BL	0.518		PD1	0.533		D1D5	0.5		D1D8	0.522		Post D1	0.517
BL	0.519		PD1	0.5		D1D5	0.519		D1D8	0.5		Post D1	0.516
BL	0.51		PD1	0.5		D1D5	0.519		D1D8	0.5		Post D1	0.56
BL	0.51		PD1	0.533		D1D5	0.542		D1D8	0.522		Post D1	0.56
BL	0.51		PD1	0.536		D1D5	0.536		D1D8	0.52		Post D1	0.538
BL	0.529		PD1	0.533		D1D5	0.5		D1D8	0.5		Post D1	0.542
BL	0.509		PD1	0.5		D1D5	0.5		D1D8	0.538		Post D1	0.583
BL	0.531		PD1	0.538		D1D5	0.5		D1D8	0.52		Post D1	0.56
BL	0.51		PD1	0.52		D1D5	0.52		D1D8	0.538		Post D1	0.6
BL	0.519		PD1	0.52		D1D5	0.519		D1D8	0.5		Post D1	0.615
BL	0.52		PD1	0.583		D1D5	0.5		D1D8	0.52		Post D1	0.577
BL	0.54		PD1	0.56		D1D5	0.522		D1D8	0.545		Post D1	0.52
BL	0.509		PD1	0.519		D1D5	0.522		D1D8	0.727		Post D1	0.522
BL	0.517		PD1	0.536		D1D5	0.522		D1D8	0.52		Post D1	0.542
BL	0.542		PD1	0.519		D1D5	0.5		D1D8	0.52		Post D1	0.577
BL	0.535		PD1	0.5		D1D5	0.5		D1D8	0.52		Post D1	0.5
BL	0.511		PD1	0.522		D1D5	0.5		D1D8	0.52		Post D1	0.5
BL	0.523		PD1	0.5		D1D5	0.5		D1D8	0.522		Post D1	0.5
BL	0.532		PD1	0.545		D1D5	0.538		D1D8	0.52		Post D1	0.519
BL	0.5		PD1	0.545		D1D5	0.556		D1D8	0.5		Post D1	0.52
BL	0.532		PD1	0.524		D1D5	0.56		D1D8	0.52		Post D1	0.52
BL	0.521		PD1	0.5		D1D5	0.5		D1D8	0.52		Post D1	0.52
BL	0.556		PD1	0.5		D1D5	0.52		D1D8	0.542		Post D1	0.5
BL	0.54		PD1	0.52		D1D5	0.519		D1D8	0.519		Post D1	0.577
BL	0.542		PD1	0.542		D1D5	0.538		D1D8	0.538		Post D1	0.567
BL	0.56		PD1	0.5		D1D5	0.519		D1D8	0.556		Post D1	0.552
BL	0.519		PD1	0.667		D1D5	0.552		D1D8	0.542		Post D1	0.571
BL	0.558		PD1	0.522		D1D5	0.5		D1D8	0.593		Post D1	0.52
BL	0.592		PD1	0.5		D1D5	0.519		D1D8	0.56		Post D1	0.5
BL	0.528		PD1	0.5		D1D5	0.538		D1D8	0.577		Post D1	0.621
BL	0.527		PD1	0.52		D1D5	0.52		D1D8	0.571		Post D1	0.5
BL	0.511		PD1	0.565		D1D5	0.5		D1D8	0.692		Post D1	0.5
BL	0.519		PD1	0.522		D1D5	0.5		D1D8	0.692		Post D1	0.5
BL	0.519		PD1	0.522		D1D5	0.5		D1D8	0.552		Post D1	0.522
BL	0.5		PD1	0.5		D1D5	0.542		D1D8	0.5		Post D1	0.538
BL	0.549		PD1	0.519		D1D5	0.538		D1D8	0.577		Post D1	0.56
BL	0.549		PD1	0.5		D1D5	0.538		D1D8	0.808		Post D1	0.615
BL	0.52		PD1	0.522		D1D5	0.5		D1D8	0.522		Post D1	0.586
BL	0.527		PD1	0.542		D1D5	0.519		D1D8	0.52		Post D1	0.5
BL	0.574		PD1	0.542		D1D5	0.5		D1D8	0.52		Post D1	0.5
BL	0.574		PD1	0.538		D1D5	0.556		D1D8	0.52		Post D1	0.533
BL	0.571		PD1	0.56		D1D5	0.5		D1D8	0.52		Post D1	0.516
BL	0.556		PD1	0.542		D1D5	0.538		D1D8	0.56		Post D1	0.548
BL	0.618		PD1	0.538		D1D5	0.577		D1D8	0.538		Post D1	0.5
BL	0.607		PD1	0.556		D1D5	0.52		D1D8	0.583		Post D1	0.516
BL	0.612		PD1	0.52		D1D5	0.522		D1D8	0.52		Post D1	0.516
BL	0.642		PD1	0.522		D1D5	0.56		D1D8	0.645		Post D1	0.533
BL	0.618		PD1	0.542		D1D5	0.565		D1D8	0.538		Post D1	0.6
BL	0.577		PD1	0.577		D1D5	0.538		D1D8	0.556		Post D1	0.548
BL	0.642		PD1	0.5		D1D5	0.522		D1D8	0.538		Post D1	0.5
BL	0.672		PD1	0.5		D1D5	0.522		D1D8	0.52		Post D1	0.533
BL	0.519		PD1	0.586		D1D5	0.583		D1D8	0.5		Post D1	0.542
BL	0.538		PD1	0.516		D1D5	0.52		D1D8	0.538		Post D1	0.538
BL	0.519		PD1	0.519		D1D5	0.56		D1D8	0.5		Post D1	0.538
BL	0.538		PD1	0.533		D1D5	0.586		D1D8	0.538		Post D1	0.52
BL	0.538		PD1	0.5		D1D5	0.567		D1D8	0.52		Post D1	0.52
BL	0.542		PD1	0.552		D1D5	0.515		D1D8	0.5		Post D1	0.5
BL	0.538		PD1	0.6		D1D5	0.519		D1D8	0.5		Post D1	0.538
BL	0.58		PD1	0.536		D1D5	0.5		D1D8	0.5		Post D1	0.538
BL	0.532		PD1	0.5		D1D5	0.542		D1D8	0.591		Post D1	0.522
BL	0.511		PD1	0.517		D1D5	0.517		D1D8	0.542		Post D1	0.542
BL	0.52		PD1	0.522		D1D5	0.519		D1D8	0.5		Post D1	0.522
BL	0.529		PD1	0.524		D1D5	0.519		D1D8	0.545		Post D1	0.542
BL	0.563		PD1	0.591		D1D5	0.538		D1D8	0.522		Post D1	0.56
BL	0.574		PD1	0.522		D1D5	0.591		D1D8	0.522		Post D1	0.52
BL	0.531		PD1	0.5		D1D5	0.524		D1D8	0.5		Post D1	0.5
BL	0.569		PD1	0.545		D1D5	0.526		D1D8	0.583		Post D1	0.519
BL	0.564		PD1	0.5		D1D5	0.55		D1D8	0.556		Post D1	0.52
BL	0.538		PD1	0.565		D1D5	0.5		D1D8	0.559		Post D1	0.538
BL	0.561		PD1	0.522		D1D5	0.52		D1D8	0.516		Post D1	0.56
BL	0.545		PD1	0.522		D1D5	0.571		D1D8	0.5		Post D1	0.571
BL	0.542		PD1	0.5		D1D5	0.591		D1D8	0.533		Post D1	0.536
BL	0.518		PD1	0.565		D1D5	0.545		D1D8	0.607		Post D1	0.536
BL	0.538		PD1	0.5		D1D5	0.542		D1D8	0.52		Post D1	0.5
BL	0.554		PD1	0.565		D1D5	0.591		D1D8	0.552		Post D1	0.519
BL	0.536		PD1	0.5		D1D5	0.667		D1D8	0.545		Post D1	0.519
BL	0.509		PD1	0.538		D1D5	0.609		D1D8	0.517		Post D1	0.519
BL	0.51		PD1	0.5		D1D5	0.545		D1D8	0.517		Post D1	0.5
BL	0.51		PD1	0.5		D1D5	0.5		D1D8	0.533		Post D1	0.517
BL	0.509		PD1	0.542		D1D5	0.545		D1D8	0.517		Post D1	0.536
BL	0.554		PD1	0.5		D1D5	0.522		D1D8	0.5		Post D1	0.531
BL	0.585		PD1	0.522		D1D5	0.5		D1D8	0.5		Post D1	0.517
BL	0.585		PD1	0.52		D1D5	0.542		D1D8	0.565		Post D1	0.552
BL	0.525		PD1	0.542		D1D5	0.545		D1D8	0.536		Post D1	0.517
BL	0.587		PD1	0.538		D1D5	0.5		D1D8	0.5		Post D1	0.5
BL	0.519		PD1	0.542		D1D5	0.524		D1D8	0.5		Post D1	0.531
BL	0.529		PD1	0.556		D1D5	0.522		D1D8	0.5		Post D1	0.593
BL	0.615		PD1	0.5		D1D5	0.519		D1D8	0.522		Post D1	0.538
BL	0.571		PD1	0.533		D1D5	0.5		D1D8	0.56		Post D1	0.542
BL	0.56		PD1	0.519		D1D5	0.519		D1D8	0.52		Post D1	0.565
BL	0.6		PD1	0.556		D1D5	0.5		D1D8	0.519		Post D1	0.556
BL	0.577		PD1	0.56		D1D5	0.519		D1D8	0.52		Post D1	0.538
BL	0.566		PD1	0.517		D1D5	0.552		D1D8	0.52		Post D1	0.536
BL	0.564		PD1	0.5		D1D5	0.52		D1D8	0.52		Post D1	0.577
BL	0.5		PD1	0.516		D1D5	0.5		D1D8	0.522		Post D1	0.56
BL	0.5		PD1	0.517		D1D5	0.519		D1D8	0.522		Post D1	0.607
BL	0.5		PD1	0.517		D1D5	0.5		D1D8	0.522		Post D1	0.571
BL	0.518		PD1	0.516		D1D5	0.536		D1D8	0.522		Post D1	0.625
BL	0.5		PD1	0.516		D1D5	0.5		D1D8	0.565		Post D1	0.56
BL	0.537		PD1	0.5		D1D5	0.519		D1D8	0.542		Post D1	0.556
BL	0.527		PD1	0.517		D1D5	0.517		D1D8	0.565		Post D1	0.538
BL	0.556		PD1	0.516		D1D5	0.538		D1D8	0.52		Post D1	0.519
BL	0.533		PD1	0.619		D1D5	0.533		D1D8	0.56		Post D1	0.536
BL	0.5		PD1	0.538		D1D5	0.586		D1D8	0.609		Post D1	0.571
BL	0.531		PD1	0.652		D1D5	0.571		D1D8	0.56		Post D1	0.556
BL	0.521		PD1	0.565		D1D5	0.536		D1D8	0.577		Post D1	0.519
BL	0.512		PD1	0.522		D1D5	0.591		D1D8	0.538		Post D1	0.517
BL	0.537		PD1	0.522		D1D5	0.565		D1D8	0.542		Post D1	0.56
BL	0.511		PD1	0.538		D1D5	0.625		D1D8	0.591		Post D1	0.542
BL	0.511		PD1	0.522		D1D5	0.667		D1D8	0.545		Post D1	0.538
BL	0.581		PD1	0.5		D1D5	0.682		D1D8	0.5		Post D1	0.556
BL	0.511		PD1	0.542		D1D5	0.654		D1D8	0.524		Post D1	0.519
BL	0.523		PD1	0.542		D1D5	0.654		D1D8	0.522		Post D1	0.5
BL	0.521		PD1	0.565		D1D5	0.708		D1D8	0.5		Post D1	0.556
BL	0.545		PD1	0.542		D1D5	0.56		D1D8	0.5		Post D1	0.519
BL	0.512		PD1	0.542		D1D5	0.583		D1D8	0.524		Post D1	0.5
BL	0.512		PD1	0.519		D1D5	0.556		D1D8	0.5		Post D1	0.583
BL	0.558		PD1	0.538		D1D5	0.538		D1D8	0.522		Post D1	0.542
BL	0.512		PD1	0.536		D1D5	0.538		D1D8	0.522		Post D1	0.52
BL	0.524		PD1	0.571		D1D5	0.52		D1D8	0.522		Post D1	0.52
BL	0.551		PD1	0.519		D1D5	0.536		D1D8	0.522		Post D1	0.542
BL	0.512		PD1	0.5		D1D5	0.538		D1D8	0.5		Post D1	0.542
BL	0.5		PD1	0.542		D1D5	0.519		D1D8	0.522		Post D1	0.6
BL	0.5		PD1	0.522		D1D5	0.556		D1D8	0.571		Post D1	0.542
BL	0.52		PD1	0.522		D1D5	0.538		D1D8	0.594		Post D1	0.524
BL	0.52		PD1	0.52		D1D5	0.542		D1D8	0.586		Post D1	0.538
BL	0.5		PD1	0.5		D1D5	0.5		D1D8	0.581		Post D1	0.565
BL	0.536		PD1	0.522		D1D5	0.52		D1D8	0.556		Post D1	0.542
BL	0.521		PD1	0.542		D1D5	0.538		D1D8	0.5		Post D1	0.542
BL	0.519		PD1	0.556		D1D5	0.538		D1D8	0.556		Post D1	0.542
BL	0.517		PD1	0.5		D1D5	0.5		D1D8	0.571		Post D1	0.556
BL	0.52		PD1	0.52		D1D5	0.818		D1D8	0.571		Post D1	0.538
BL	0.519		PD1	0.52		D1D5	0.704		D1D8	0.567		Post D1	0.556
BL	0.529		PD1	0.545		D1D5	0.609		D1D8	0.517		Post D1	0.519
BL	0.519		PD1	0.571		D1D5	0.538		D1D8	0.559		Post D1	0.64
BL	0.52		PD1	0.524		D1D5	0.5		D1D8	0.56		Post D1	0.63
BL	0.521		PD1	0.522		D1D5	0.52		D1D8	0.542		Post D1	0.577
BL	0.519		PD1	0.571		D1D5	0.52		D1D8	0.522		Post D1	0.56
BL	0.519		PD1	0.542		D1D5	0.5		D1D8	0.522		Post D1	0.522
BL	0.544		PD1	0.522		D1D5	0.5		D1D8	0.519		Post D1	0.522
BL	0.574		PD1	0.565		D1D5	0.522		D1D8	0.615		Post D1	0.52
BL	0.528		PD1	0.524		D1D5	0.55		D1D8	0.615		Post D1	0.522
BL	0.542		PD1	0.591		D1D5	0.571		D1D8	0.56		Post D1	0.538
BL	0.536		PD1	0.565		D1D5	0.524		D1D8	0.577		Post D1	0.5
BL	0.574		PD1	0.545		D1D5	0.545		D1D8	0.625		Post D1	0.522
BL	0.531		PD1	0.5		D1D5	0.565		D1D8	0.6		Post D1	0.522
BL	0.534		PD1	0.5		D1D5	0.524		D1D8	0.583		Post D1	0.542
BL	0.556		PD1	0.524		D1D5	0.524		D1D8	0.556		Post D1	0.5
BL	0.521		PD1	0.5		D1D5	0.522		D1D8	0.536		Post D1	0.522
BL	0.512		PD1	0.5		D1D5	0.524		D1D8	0.519		Post D1	0.5
BL	0.531		PD1	0.545		D1D5	0.5		D1D8	0.5		Post D1	0.5
BL	0.571		PD1	0.565		D1D5	0.5		D1D8	0.52		Post D1	0.5
BL	0.549		PD1	0.545		D1D5	0.542		D1D8	0.5		Post D1	0.517
BL	0.521		PD1	0.542		D1D5	0.542		D1D8	0.536		Post D1	0.517
BL	0.538		PD1	0.5		D1D5	0.56		D1D8	0.519		Post D1	0.517
BL	0.519		PD1	0.545		D1D5	0.519		D1D8	0.5		Post D1	0.517
BL	0.564		PD1	0.5		D1D5	0.565		D1D8	0.519		Post D1	0.5
BL	0.544		PD1	0.5		D1D5	0.6		D1D8	0.519		Post D1	0.536
BL	0.571		PD1	0.571		D1D5	0.56		D1D8	0.5		Post D1	0.556
BL	0.511		PD1	0.545		D1D5	0.542		D1D8	0.522		Post D1	0.52
BL	0.5		PD1	0.5		D1D5	0.52		D1D8	0.56		Post D1	0.567
BL	0.521		PD1	0.5		D1D5	0.52		D1D8	0.5		Post D1	0.5
BL	0.542		PD1	0.591		D1D5	0.583		D1D8	0.522		Post D1	0.5
BL	0.51		PD1	0.542		D1D5	0.56		D1D8	0.542		Post D1	0.519
BL	0.521		PD1	0.524		D1D5	0.52		D1D8	0.5		Post D1	0.538
BL	0.531		PD1	0.56		D1D5	0.69		D1D8	0.52		Post D1	0.556
BL	0.54		PD1	0.565		D1D5	0.738		D1D8	0.542		Post D1	0.538
BL	0.531		PD1	0.522		D1D5	0.556		D1D8	0.52		Post D1	0.519
BL	0.509		PD1	0.522		D1D5	0.526		D1D8	0.52		Post D1	0.519
BL	0.524		PD1	0.545		D1D5	0.556		D1D8	0.52		Post D1	0.52
BL	0.6		PD1	0.5		D1D5	0.55		D1D8	0.52		Post D1	0.52
BL	0.589		PD1	0.5		D1D5	0.545		D1D8	0.52		Post D1	0.542
BL	0.541		PD1	0.593		D1D5	0.5		D1D8	0.519		Post D1	0.522
BL	0.556		PD1	0.536		D1D5	0.545		D1D8	0.545		Post D1	0.52
BL	0.61		PD1	0.538		D1D5	0.545		D1D8	0.522		Post D1	0.52
BL	0.55		PD1	0.571		D1D5	0.5		D1D8	0.545		Post D1	0.522
BL	0.545		PD1	0.556		D1D5	0.538		D1D8	0.542		Post D1	0.52
BL	0.52		PD1	0.517		D1D5	0.56		D1D8	0.524		Post D1	0.52
BL	0.558		PD1	0.556		D1D5	0.556		D1D8	0.5		Post D1	0.52
BL	0.521		PD1	0.536		D1D5	0.536		D1D8	0.524		Post D1	0.5
BL	0.569		PD1	0.533		D1D5	0.533		D1D8	0.524		Post D1	0.5
BL	0.509		PD1	0.517		D1D5	0.556		D1D8	0.571		Post D1	0.52
BL	0.622		PD1	0.5		D1D5	0.519		D1D8	0.524		Post D1	0.52
BL	0.569		PD1	0.5		D1D5	0.517		D1D8	0.571		Post D1	0.5
BL	0.519		PD1	0.542		D1D5	0.516		D1D8	0.522		Post D1	0.536
BL	0.574		PD1	0.52		D1D5	0.52		D1D8	0.522		Post D1	0.519
BL	0.528		PD1	0.5		D1D5	0.583		D1D8	0.565		Post D1	0.556
BL	0.529		PD1	0.522		D1D5	0.565		D1D8	0.5		Post D1	0.536
BL	0.556		PD1	0.545		D1D5	0.52		D1D8	0.5		Post D1	0.519
BL	0.51		PD1	0.538		D1D5	0.5		D1D8	0.542		Post D1	0.5
BL	0.521		PD1	0.5		D1D5	0.577		D1D8	0.56		Post D1	0.522
BL	0.51		PD1	0.56		D1D5	0.577		D1D8	0.52		Post D1	0.5
BL	0.51		PD1	0.536		D1D5	0.538		D1D8	0.522		Post D1	0.5
BL	0.5		PD1	0.517		D1D5	0.52		D1D8	0.5		Post D1	0.542
BL	0.51		PD1	0.52		D1D5	0.522		D1D8	0.5		Post D1	0.542
BL	0.51		PD1	0.577		D1D5	0.542		D1D8	0.542		Post D1	0.5
BL	0.51		PD1	0.536		D1D5	0.522		D1D8	0.565		Post D1	0.52
BL	0.5		PD1	0.516		D1D5	0.6		D1D8	0.545		Post D1	0.522
BL	0.509		PD1	0.5		D1D5	0.536		D1D8	0.545		Post D1	0.524
BL	0.528		PD1	0.5		D1D5	0.538		D1D8	0.52		Post D1	0.52
BL	0.51		PD1	0.517		D1D5	0.545		D1D8	0.542		Post D1	0.538
BL	0.511		PD1	0.519		D1D5	0.52		D1D8	0.565		Post D1	0.519
BL	0.529		PD1	0.517		D1D5	0.56		D1D8	0.5		Post D1	0.519
BL	0.54		PD1	0.516		D1D5	0.571		D1D8	0.538		Post D1	0.519
BL	0.518		PD1	0.5		D1D5	0.52		D1D8	0.615		Post D1	0.5
BL	0.6		PD1	0.517		D1D5	0.52		D1D8	0.542		Post D1	0.5
BL	0.585		PD1	0.552		D1D5	0.5		D1D8	0.56		Post D1	0.52
BL	0.5		PD1	0.567		D1D5	0.52		D1D8	0.5		Post D1	0.52
BL	0.545		PD1	0.5		D1D5	0.52		D1D8	0.542		Post D1	0.517
BL	0.563		PD1	0.5		D1D5	0.542		D1D8	0.522		Post D1	0.538
BL	0.605		PD1	0.516		D1D5	0.542		D1D8	0.583		Post D1	0.536
BL	0.571		PD1	0.5		D1D5	0.5		D1D8	0.516		Post D1	0.517
BL	0.543		PD1	0.545		D1D5	0.556		D1D8	0.519		Post D1	0.533
BL	0.524		PD1	0.545		D1D5	0.538		D1D8	0.519		Post D1	0.519
BL	0.533		PD1	0.522		D1D5	0.519		D1D8	0.519		Post D1	0.519
BL	0.556		PD1	0.5		D1D5	0.538		D1D8	0.52		Post D1	0.52
BL	0.581		PD1	0.522		D1D5	0.5		D1D8	0.538		Post D1	0.538
BL	0.534		PD1	0.522		D1D5	0.519		D1D8	0.556		Post D1	0.5
BL	0.542		PD1	0.542		D1D5	0.519		D1D8	0.519		Post D1	0.522
BL	0.508		PD1	0.542		D1D5	0.556		D1D8	0.519		Post D1	0.52
BL	0.552		PD1	0.536		D1D5	0.538		D1D8	0.519		Post D1	0.542
BL	0.523		PD1	0.5		D1D5	0.563		D1D8	0.5		Post D1	0.52
BL	0.522		PD1	0.536		D1D5	0.571		D1D8	0.538		Post D1	0.52
BL	0.5		PD1	0.571		D1D5	0.538		D1D8	0.538		Post D1	0.538
BL	0.52		PD1	0.538		D1D5	0.52		D1D8	0.5		Post D1	0.56
BL	0.522		PD1	0.5		D1D5	0.519		D1D8	0.538		Post D1	0.52
BL	0.51		PD1	0.5		D1D5	0.519		D1D8	0.5		Post D1	0.536
BL	0.511		PD1	0.538		D1D5	0.517		D1D8	0.5		Post D1	0.5
BL	0.528		PD1	0.538		D1D5	0.519		D1D8	0.519		Post D1	0.5
			PD1	0.519		D1D5	0.5		D1D8	0.519		Post D1	0.517
			PD1	0.52		D1D5	0.5		D1D8	0.538		Post D1	0.517
			PD1	0.52		D1D5	0.56		D1D8	0.52		Post D1	0.517
			PD1	0.538		D1D5	0.556		D1D8	0.519		Post D1	0.548
			PD1	0.52		D1D5	0.536		D1D8	0.538		Post D1	0.533
			PD1	0.522		D1D5	0.519		D1D8	0.609		Post D1	0.536
			PD1	0.5		D1D5	0.519		D1D8	0.571		Post D1	0.545
			PD1	0.52		D1D5	0.52		D1D8	0.524		Post D1	0.5
			PD1	0.5		D1D5	0.5		D1D8	0.5		Post D1	0.52
			PD1	0.5		D1D5	0.52		D1D8	0.5		Post D1	0.52
			PD1	0.5		D1D5	0.577		D1D8	0.545		Post D1	0.615
			PD1	0.5		D1D5	0.542		D1D8	0.6		Post D1	0.542
			PD1	0.52		D1D5	0.5		D1D8	0.52		Post D1	0.519
			PD1	0.524		D1D5	0.536		D1D8	0.542		Post D1	0.538
			PD1	0.522		D1D5	0.519		D1D8	0.5		Post D1	0.5
			PD1	0.545		D1D5	0.536		D1D8	0.5		Post D1	0.522
			PD1	0.522		D1D5	0.5		D1D8	0.524		Post D1	0.5
			PD1	0.565		D1D5	0.519		D1D8	0.542		Post D1	0.5
			PD1	0.542		D1D5	0.5		D1D8	0.543		Post D1	0.52
			PD1	0.542		D1D5	0.533		D1D8	0.6		Post D1	0.52
			PD1	0.545		D1D5	0.519		D1D8	0.538		Post D1	0.56
			PD1	0.5		D1D5	0.519		D1D8	0.5		Post D1	0.5
			PD1	0.542		D1D5	0.556		D1D8	0.552		Post D1	0.522
			PD1	0.542		D1D5	0.522		D1D8	0.517		Post D1	0.542
			PD1	0.5		D1D5	0.542		D1D8	0.5		Post D1	0.56
			PD1	0.536		D1D5	0.5		D1D8	0.517		Post D1	0.542
			PD1	0.536		D1D5	0.556		D1D8	0.548		Post D1	0.519
			PD1	0.519		D1D5	0.5		D1D8	0.531		Post D1	0.538
			PD1	0.533		D1D5	0.5		D1D8	0.522		Post D1	0.556
			PD1	0.5		D1D5	0.522		D1D8	0.522		Post D1	0.52
			PD1	0.552		D1D5	0.545		D1D8	0.5		Post D1	0.5
			PD1	0.556		D1D5	0.5		D1D8	0.519		Post D1	0.538
			PD1	0.5		D1D5	0.542		D1D8	0.565		Post D1	0.5
			PD1	0.5		D1D5	0.552		D1D8	0.522		Post D1	0.52
			PD1	0.536		D1D5	0.517		D1D8	0.5		Post D1	0.519
			PD1	0.533		D1D5	0.517		D1D8	0.522		Post D1	0.517
			PD1	0.52		D1D5	0.517		D1D8	0.542
			PD1	0.545		D1D5	0.529		D1D8	0.522
			PD1	0.52		D1D5	0.536		D1D8	0.5
			PD1	0.52		D1D5	0.5		D1D8	0.542
			PD1	0.542		D1D5	0.517		D1D8	0.542
			PD1	0.522		D1D5	0.517		D1D8	0.542
			PD1	0.5		D1D5	0.533		D1D8	0.556
			PD1	0.56		D1D5	0.583		D1D8	0.519
			PD1	0.542		D1D5	0.519		D1D8	0.519
			PD1	0.542		D1D5	0.519		D1D8	0.5
			PD1	0.52		D1D5	0.519		D1D8	0.519
			PD1	0.5		D1D5	0.542		D1D8	0.542
			PD1	0.5		D1D5	0.5		D1D8	0.615
			PD1	0.536		D1D5	0.52		D1D8	0.536
			PD1	0.517		D1D5	0.52		D1D8	0.538
			PD1	0.5		D1D5	0.542		D1D8	0.5
			PD1	0.519		D1D5	0.52		D1D8	0.545
			PD1	0.52		D1D5	0.52		D1D8	0.522
			PD1	0.556		D1D5	0.542		D1D8	0.522
			PD1	0.5		D1D5	0.522		D1D8	0.52
			PD1	0.538		D1D5	0.538		D1D8	0.542
			PD1	0.556		D1D5	0.56		D1D8	0.52
			PD1	0.571		D1D5	0.565		D1D8	0.52
			PD1	0.517		D1D5	0.6		D1D8	0.52
			PD1	0.5		D1D5	0.538		D1D8	0.52
			PD1	0.519		D1D5	0.538		D1D8	0.52
			PD1	0.519		D1D5	0.542		D1D8	0.522
			PD1	0.519		D1D5	0.556		D1D8	0.538
			PD1	0.52		D1D5	0.545		D1D8	0.542
			PD1	0.52		D1D5	0.522		D1D8	0.52
			PD1	0.536		D1D5	0.522		D1D8	0.519
			PD1	0.577		D1D5	0.52		D1D8	0.517
						D1D5	0.542		D1D8	0.522
						D1D5	0.565		D1D8	0.565
						D1D5	0.52		D1D8	0.522
						D1D5	0.5		D1D8	0.52
						D1D5	0.583		D1D8	0.5
						D1D5	0.5		D1D8	0.581
						D1D5	0.522		D1D8	0.5
						D1D5	0.5		D1D8	0.519
									D1D8	0.536
									D1D8	0.552
									D1D8	0.5
									D1D8	0.519
									D1D8	0.567
									D1D8	0.514
									D1D8	0.538
									D1D8	0.519
									D1D8	0.517
									D1D8	0.536
									D1D8	0.524
									D1D8	0.526
									D1D8	0.55
									D1D8	0.524
									D1D8	0.5
									D1D8	0.545
									D1D8	0.522
									D1D8	0.524
									D1D8	0.522
									D1D8	0.522
									D1D8	0.522
									D1D8	0.524
									D1D8	0.5
									D1D8	0.56
									D1D8	0.524
									D1D8	0.5
									D1D8	0.56
									D1D8	0.5
									D1D8	0.545
									D1D8	0.5
									D1D8	0.522
									D1D8	0.538
									D1D8	0.522
									D1D8	0.542
									D1D8	0.522
									D1D8	0.545
									D1D8	0.522
									D1D8	0.5
									D1D8	0.52
									D1D8	0.5
									D1D8	0.52
									D1D8	0.5
									D1D8	0.5
									D1D8	0.52
									D1D8	0.5
									D1D8	0.536
									D1D8	0.52
									D1D8	0.542
									D1D8	0.52
									D1D8	0.5
									D1D8	0.52
									D1D8	0.52
Average	0.539985		Average	0.530353		Average	0.537296		Average	0.534504		Average	0.533973
St. Deviation	0.0337679		St. Deviation	0.0259188		St. Deviation	0.0379828		St. Deviation	0.0331293		St. Deviation	0.0260058
Total Number Steps	340		Total Number Steps	408		Total Number Steps	416		Total Number Steps	468		Total Number Steps	376
# of steps outside 2 S.D.	26		# of steps outside 2 S.D.	9		# of steps outside 2 S.D.	23		# of steps outside 2 S.D.	24		# of steps outside 2 S.D.	2
