# Supplementary material for: Silencing long-descending inter-enlargement propriospinal neurons improves hindlimb stepping after contusive spinal cord injuries
Source: eLife. 2023 Dec 15;12:e82944. doi: 10.7554/eLife.82944 (PMC10776087; doi:10.7554/eLife.82944)
Supplement: Figure 5—source data 1. — The section(s) with the smallest amount of spared white matter represents the injury epicenter. [file elife-82944-fig5-data1.xlsx]

## Sheet: SWM
Animal ID	% SWM
2	25
3	17
4	26
9	39
12	21
15	33
16	30
19	17
Average	26
StDev	7.76439
