# Supplementary material for: Silencing long-descending inter-enlargement propriospinal neurons improves hindlimb stepping after contusive spinal cord injuries
Source: eLife. 2023 Dec 15;12:e82944. doi: 10.7554/eLife.82944 (PMC10776087; doi:10.7554/eLife.82944)
Supplement: Figure 7—source data 1. [file elife-82944-fig7-data1.xlsx]

## Sheet: BBB Raw Scores
Animal ID	Time Point	Side	BBB Score			Animal ID	Time Point	Side	BBB Score
2	PD2	Left	12			2	D2D5	Left	12
3	PD2	Left	11			3	D2D5	Left	12
4	PD2	Left	11			4	D2D5	Left	11
9	PD2	Left	12			9	D2D5	Left	11
11	PD2	Left	12			11	D2D5	Left	11
12	PD2	Left	11			12	D2D5	Left	11
15	PD2	Left	12			15	D2D5	Left	12
16	PD2	Left	13			16	D2D5	Left	13
19	PD2	Left	11			19	D2D5	Left	11
20	PD2	Left	12			20	D2D5	Left	12
2	PD2	Right	13			2	D2D5	Right	12
3	PD2	Right	13			3	D2D5	Right	12
4	PD2	Right	11			4	D2D5	Right	11
9	PD2	Right	12			9	D2D5	Right	11
11	PD2	Right	11			11	D2D5	Right	11
12	PD2	Right	12			12	D2D5	Right	11
15	PD2	Right	12			15	D2D5	Right	12
16	PD2	Right	13			16	D2D5	Right	13
19	PD2	Right	11			19	D2D5	Right	11
20	PD2	Right	12			20	D2D5	Right	12
2	Post D2	Left	12			2	D2D8	Left	13
3	Post D2	Left	11			3	D2D8	Left	18
4	Post D2	Left	11			4	D2D8	Left	13
9	Post D2	Left	12			9	D2D8	Left	13
11	Post D2	Left	11			11	D2D8	Left	18
12	Post D2	Left	11			12	D2D8	Left	13
15	Post D2	Left	12			15	D2D8	Left	13
16	Post D2	Left	12			16	D2D8	Left	18
19	Post D2	Left	11			19	D2D8	Left	11
20	Post D2	Left	12			20	D2D8	Left	16
2	Post D2	Right	12			2	D2D8	Right	13
3	Post D2	Right	11			3	D2D8	Right	18
4	Post D2	Right	11			4	D2D8	Right	13
9	Post D2	Right	12			9	D2D8	Right	13
11	Post D2	Right	12			11	D2D8	Right	18
12	Post D2	Right	11			12	D2D8	Right	13
15	Post D2	Right	12			15	D2D8	Right	13
16	Post D2	Right	13			16	D2D8	Right	18
19	Post D2	Right	11			19	D2D8	Right	11
20	Post D2	Right	12			20	D2D8	Right	18
2	PD3	Left	13			2	D3D5	Left	18
3	PD3	Left	13			3	D3D5	Left	13
4	PD3	Left	11			4	D3D5	Left	12
9	PD3	Left	12			9	D3D5	Left	15
11	PD3	Left	11			11	D3D5	Left	12
12	PD3	Left	12			12	D3D5	Left	12
15	PD3	Left	12			15	D3D5	Left	18
16	PD3	Left	13			16	D3D5	Left	18
19	PD3	Left	11			19	D3D5	Left	11
20	PD3	Left	12			20	D3D5	Left	16
2	PD3	Right	12			2	D3D5	Right	18
3	PD3	Right	11			3	D3D5	Right	13
4	PD3	Right	11			4	D3D5	Right	12
9	PD3	Right	12			9	D3D5	Right	15
11	PD3	Right	11			11	D3D5	Right	12
12	PD3	Right	11			12	D3D5	Right	12
15	PD3	Right	12			15	D3D5	Right	18
16	PD3	Right	12			16	D3D5	Right	18
19	PD3	Right	11			19	D3D5	Right	11
20	PD3	Right	12			20	D3D5	Right	16
						2	D3D8	Left	18
						3	D3D8	Left	12
						4	D3D8	Left	13
						9	D3D8	Left	16
						11	D3D8	Left	18
						12	D3D8	Left	12
						15	D3D8	Left	18
						16	D3D8	Left	18
						19	D3D8	Left	11
						20	D3D8	Left	16
						2	D3D8	Right	16
						3	D3D8	Right	12
						4	D3D8	Right	13
						9	D3D8	Right	15
						11	D3D8	Right	18
						12	D3D8	Right	12
						15	D3D8	Right	18
						16	D3D8	Right	18
						19	D3D8	Right	11
						20	D3D8	Right	18
						2	D3D13	Left	13
						3	D3D13	Left	18
						4	D3D13	Left	12
						9	D3D13	Left	15
						11	D3D13	Left	18
						12	D3D13	Left	13
						15	D3D13	Left	18
						16	D3D13	Left	18
						19	D3D13	Left	12
						20	D3D13	Left	16
						2	D3D13	Right	13
						3	D3D13	Right	16
						4	D3D13	Right	12
						9	D3D13	Right	15
						11	D3D13	Right	18
						12	D3D13	Right	13
						15	D3D13	Right	16
						16	D3D13	Right	18
						19	D3D13	Right	12
						20	D3D13	Right	18

## Sheet: Avg BBB
Animal ID	Control L	Dox L	Control R	Dox R
2	12.3333	14.8	12.3333	14.4
3	11.6667	14.6	11.6667	14.2
4	11	12.2	11	12.2
9	12	14	12	13.8
12	11.3333	12.2	11.3333	12.2
15	12	15.8	12	15.4
16	12.6667	17	12.6667	17
19	11	11.2	11	11.2

## Sheet: Gross Motor
Animal ID	Control CPI	Dox CPI	Control RI	Dox RI	Control PSI	Dox PSI	Control DSI	Dox DSI
2	89.7504	88.2314	59.9939	81.1321	86.9595	92.6704	18.438	7.70882
3	89.0849	90.3289	60.8046	87.2638	90.8288	99.7319	8.51467	2.45122
4	81.4277	86.5403	57.3227	68.2181	57.9201	82.2245	44.5083	17.4549
9	86.5013	88.3669	61.2894	71.1431	77.3545	85.7466	27.7289	13.8706
12	80.6142	86.1766	59.5969	77.1796	88.3294	92.9287	21.1857	11.7568
15	90.1777	94.0489	66.4089	84.0529	88.8889	96.3801	15.3289	6.11886
16	92.3789	88.8423	65.7404	92.533	92.8612	98.2145	1.5873	0
19	65.8526	83.7058	56.1861	68.9567	51.4493	85.7762	57.1991	17.8038
	84.4735	88.2801	60.9179	78.8099	79.324	91.7091	24.3113	9.64562
	8.612	3.07474	3.61489	8.97123	15.971	6.45451	18.4858	6.66371

## Sheet: Dorsal Step Sidedness
Animal ID	R Con	L Con	R Dox	L Dox
2	0.625	0.375	0.567	0.433
3	0.233333	0.766667	0.5	0.5
4	0.491422	0.508578	0.605	0.395
9	0.814815	0.185185	0.81	0.19
12	0.633868	0.366132	0.347619	0.652381
16	0.433036	0.566964	0.37619	0.62381
19	0.590899	0.409101	0.664444	0.335556
Average	0.546053	0.453947	0.552893	0.447107
StDev	0.183366	0.183366	0.162081	0.162081
