# Supplementary material for: Silencing long-descending inter-enlargement propriospinal neurons improves hindlimb stepping after contusive spinal cord injuries
Source: eLife. 2023 Dec 15;12:e82944. doi: 10.7554/eLife.82944 (PMC10776087; doi:10.7554/eLife.82944)
Supplement: Figure 8—source data 1. [file elife-82944-fig8-data1.xlsx]

## Sheet: Intralimb
Animal ID	Control Left HAT	Dox Left HAT	Control Right HAT	Dox Right HAT	Control Left IHA	Dox Left IHA	Control Right IHA	Dox Right IHA	Control Left Phase	Dox Left Phase	Control Right Phase	Dox Right Phase
2	91.8085	97.662	98.4639	97.8497	43.1797	51.0811	49.3344	52.0521	0.879718	0.878909	0.905989	0.915739
3	93.8759	101.142	99.2718	95.9451	43.6328	46.6949	44.3042	46.7561	0.875883	0.903551	0.86941	0.872683
4	82.3063	85.4571	86.572	95.794	38.9111	40.7399	38.2594	43.7151	0.892437	0.903651	0.872703	0.8907
9	96.8806	96.1236	90.0863	97.1208	47.0858	47.7079	38.1733	41.4885	0.906535	0.866934	0.881909	0.904191
12	86.4009	86.4598	83.9164	93.4889	44.4159	48.0201	39.8556	45.4348	0.880261	0.910239	0.810927	0.868652
15	89.7186	95.0808	100.185	87.6532	46.4317	49.5072	49.2095	50.1361	0.868047	0.89406	0.901464	0.921566
16	97.7101	90.1715	92.5966	87.3682	53.4112	48.0985	51.7552	49.5763	0.928219	0.912814	0.905726	0.892966
19	93.2493	98.3714	76.0894	92.3411	43.5992	47.7762	30.4591	38.2769	0.844239	0.910623	0.806724	0.874192
Average	91.4938	93.8085	90.8977	93.4451	45.0834	47.4532	42.6688	45.9295	0.884417	0.897598	0.869356	0.892586
StDev	5.21009	5.77436	8.4845	4.07738	4.16883	3.02208	7.26137	4.669	0.0252604	0.0166266	0.0400021	0.0200771
