# Supplementary material for: Silencing long-descending inter-enlargement propriospinal neurons improves hindlimb stepping after contusive spinal cord injuries
Source: eLife. 2023 Dec 15;12:e82944. doi: 10.7554/eLife.82944 (PMC10776087; doi:10.7554/eLife.82944)
Supplement: Figure 9—figure supplement 1—source data 1. — Data includes pre-injury (showing no phenotype) and post-injury showing only a small change in hindlimb (HL) phase during DoxON, but otherwise no locomotor phenotype. [file elife-82944-fig9-figsupp1-data1.xlsx]

## Sheet: A.R. Pre-Injury Phase
Time point	Animal ID	Hindlimb Phase	Heterolateral Phase	Homolateral Phase	Forelimb Phase			Time point	Animal ID	Hindlimb Phase	Heterolateral Phase	Homolateral Phase	Forelimb Phase
BL	11	0.55814	0.162791	0.651163	0.533333			3	11	0.516129	0	0.516129	0.5
BL	11	0.526316	0.157895	0.631579	0.538462			3	11	0.517241	0.0322581	0.517241	0.517241
BL	11	0.516129	0	0.677419	0.6			3	11	0.567568	0.108108	0.567568	0.527778
BL	11	0.5	0.131579	0.578947	0.515152			3	11	0.594595	0.0540541	0.567568	0.512821
BL	11	0.588235	0.0294118	0.529412	0.527778			3	11	0.5	0.0882353	0.529412	0.53125
BL	11	0.514286	0.0857143	0.542857	0.515152			3	11	0.580645	0.0967742	0.612903	0.516129
BL	11	0.517241	0.0344828	0.551724	0.516129			3	11	0.545455	0.030303	0.575758	0.518519
BL	11	0.517241	0.103448	0.62069	0.517241			3	11	0.517241	0.0344828	0.62069	0.53125
BL	11	0.5	0.115385	0.615385	0.551724			3	11	0.5625	0.125	0.625	0.515152
BL	11	0.642857	0.107143	0.535714	0.571429			3	11	0.542857	0.142857	0.628571	0.5
BL	11	0.527778	0.111111	0.583333	0.527778			3	20	0.548387	0	0.548387	0.515152
BL	11	0.527778	0.111111	0.638889	0.527778			3	20	0.529412	0.0882353	0.529412	0.516129
BL	20	0.527778	0.194444	0.666667	0.540541			3	20	0.516129	0.0322581	0.516129	0.548387
BL	20	0.545455	0.121212	0.757576	0.583333			3	20	0.5	0	0.538462	0.518519
BL	20	0.53125	0	0.5	0.516129			3	20	0.5	0	0.5	0.516129
BL	20	0.529412	0	0.558824	0.516129			3	20	0.516129	0.0322581	0.548387	0.555556
BL	20	0.516129	0.0882353	0.548387	0.5			3	20	0.535714	0.0357143	0.535714	0.5
BL	20	0.5	0	0.576923	0.56			3	20	0.529412	0.0294118	0.5	0.529412
BL	20	0.535714	0.0384615	0.571429	0.5			3	20	0.516129	0.0322581	0.548387	0.516129
BL	20	0.52	0	0.52	0.538462			4	11	0.567568	0.0540541	0.648649	0.578947
BL	20	0.535714	0.0714286	0.535714	0.551724			4	11	0.577778	0.133333	0.644444	0.560976
BL	20	0.521739	0.0869565	0.652174	0.565217			4	11	0.515152	0.0606061	0.545455	0.515152
PD1	11	0.533333	0.111111	0.577778	0.512195			4	11	0.617647	0.0294118	0.558824	0.5
PD1	11	0.52381	0.0952381	0.642857	0.534884			4	11	0.542857	0.0857143	0.542857	0.515152
PD1	11	0.542857	0.0571429	0.571429	0.529412			4	11	0.571429	0.0857143	0.571429	0.527778
PD1	11	0.53125	0.03125	0.5625	0.515152			4	11	0.59375	0.0625	0.59375	0.515152
PD1	11	0.5625	0.03125	0.53125	0.515152			4	11	0.52	0	0.52	0.521739
PD1	11	0.558824	0.0294118	0.529412	0.5			4	11	0.5	0.117647	0.617647	0.514286
PD1	11	0.514286	0.142857	0.571429	0.516129			4	11	0.517241	0.0689655	0.586207	0.516129
PD1	11	0.575758	0.030303	0.636364	0.540541			4	20	0.583333	0	0.5	0.52
PD1	11	0.5	0.104167	0.520833	0.6			4	20	0.551724	0.0344828	0.517241	0.580645
PD1	11	0.527778	0.0555556	0.611111	0.512821			4	20	0.565217	0	0.521739	0.521739
PD1	11	0.557692	0.0232558	0.538462	0.545455			4	20	0.535714	0	0.535714	0.576923
PD1	11	0.534884	0.116279	0.604651	0.567568			4	20	0.517241	0.0714286	0.586207	0.5625
PD1	20	0.527778	0.0294118	0.527778	0.5			4	20	0.52	0	0.52	0.521739
PD1	20	0.529412	0.0588235	0.529412	0.548387			4	20	0.55	0.08	0.55	0.52381
PD1	20	0.521739	0.0217391	0.543478	0.607843			4	20	0.5	0.115385	0.538462	0.521739
PD1	20	0.527778	0.0263158	0.527778	0.513514			4	20	0.52	0	0.52	0.52
PD1	20	0.53125	0.0789474	0.6875	0.605263
PD1	20	0.552632	0.03125	0.526316	0.558824
PD1	20	0.551724	0.125	0.551724	0.514286
PD1	20	0.53125	0	0.53125	0.518519
PD1	20	0.567568	0.027027	0.513514	0.527778
PD1	20	0.555556	0.0555556	0.555556	0.5625
PD1	20	0.535714	0.0555556	0.535714	0.53125
Post D1	11	0.536585	0.027027	0.536585	0.574074
Post D1	11	0.540541	0.03125	0.513514	0.552632
Post D1	11	0.606061	0.030303	0.515152	0.515152
Post D1	11	0.588235	0.0882353	0.558824	0.5
Post D1	11	0.534884	0.0697674	0.511628	0.513514
Post D1	11	0.536585	0.0697674	0.560976	0.522727
Post D1	11	0.515152	0	0.515152	0.529412
Post D1	11	0.53125	0.03125	0.5	0.53125
Post D1	11	0.571429	0	0.542857	0.578947
Post D1	11	0.548387	0.0571429	0.516129	0.516129
Post D1	11	0.514286	0	0.514286	0.545455
Post D1	11	0.514286	0.0285714	0.514286	0.5
Post D1	20	0.56	0	0.52	0.518519
Post D1	20	0.5	0	0.538462	0.56
Post D1	20	0.541667	0.0384615	0.541667	0.5
Post D1	20	0.541667	0.0416667	0.541667	0.5
Post D1	20	0.583333	0.0833333	0.541667	0.521739
Post D1	20	0.545455	0	0.5	0.521739
Post D1	20	0.52	0.04	0.56	0.565217
Post D1	20	0.5	0	0.538462	0.52
Post D1	20	0.583333	0	0.541667	0.576923
Post D1	20	0.548387	0.0645161	0.548387	0.535714
Average		0.53815	0.0565604	0.561855	0.535673			Average		0.539531	0.0516171	0.55643	0.526315
St. Deviation		0.0268097	0.0479269	0.0523214	0.028112			St. Deviation		0.0308793	0.0438622	0.0421719	0.0213154
Total Number Steps		67	67	67	67			Total Number Steps		38	38	38	38
# of steps outside 2 S.D.		1	1	2	2			# of steps outside 2 S.D.		0	0	0	0

## Sheet: A.R. Post Injury Phase
Time point	Animal ID	Plantar/Dorsal	Hindlimb Phase	Heterolateral Phase	Homolateral Phase	Forelimb Phase			Time point	Animal ID	Plantar/Dorsal	Hindlimb Phase	Heterolateral Phase	Homolateral Phase	Forelimb Phase
PD2	11	Plantar	0.548387	0.0322581	0.548387	0.515152			D2D5	11	Plantar	0.513514	0.27027	0.513514	0.555556
PD2	11	Plantar	0.65625	0.09375	0.65625	0.566667			D2D5	11	Plantar	0.525	0.35	0.525	0.5
PD2	11	Plantar	0.513514	0.027027	0.513514	0.527778			D2D5	11	Plantar	0.5625	0.28125	0.5625	0.540541
PD2	11	Plantar	0.5	0	0.5	0.529412			D2D5	11	Plantar	0.535714	0.142857	0.535714	0.5
PD2	11	Plantar	0.581395	0	0.581395	0.511111			D2D5	11	Plantar	0.5	0	0.5	0.5
PD2	11	Plantar	0.514286	0.171429	0.514286	0.583333			D2D5	11	Plantar	0.514286	0.228571	0.514286	0.527778
PD2	11	Plantar	0.5	0.09375	0.5	0.514286			D2D5	11	Plantar	0.538462	0.230769	0.538462	0.5
PD2	11	Plantar	0.545455	0.030303	0.545455	0.542857			D2D5	11	Plantar	0.512195	0.219512	0.512195	0.536585
PD2	11	Plantar	0.516129	0.193548	0.516129	0.515152			D2D5	11	Plantar	0.529412	0.117647	0.529412	0.558824
PD2	11	Plantar	0.53125	0.1875	0.53125	0.5			D2D5	11	Plantar	0.538462	0.0384615	0.538462	0.551724
PD2	11	Plantar	0.558824	0.147059	0.558824	0.542857			D2D5	11	Plantar	0.518519	0	0.518519	0.5
PD2	11	Plantar	0.533333	0.0666667	0.533333	0.515152			D2D5	11	Plantar	0.518519	0.037037	0.518519	0.5
PD2	11	Plantar	0.558824	0	0.558824	0.583333			D2D5	11	Plantar	0.515152	0.242424	0.515152	0.529412
PD2	11	Plantar	0.515152	0.0606061	0.515152	0.516129			D2D5	11	Plantar	0.533333	0.233333	0.533333	0.516129
PD2	20	Plantar	0.517241	0.0344828	0.517241	0.615385			D2D5	11	Plantar	0.533333	0.2	0.533333	0.516129
PD2	20	Plantar	0.72	0.0689655	0.72	0.53125			D2D5	20	Plantar	0.542857	0.371429	0.542857	0.533333
PD2	20	Plantar	0.558824	0.264706	0.558824	0.535714			D2D5	20	Plantar	0.513514	0.135135	0.513514	0.518519
PD2	20	Plantar	0.517241	0.172414	0.517241	0.5			D2D5	20	Plantar	0.5	0.205882	0.5	0.512821
PD2	20	Plantar	0.536585	0.317073	0.536585	0.538462			D2D5	20	Plantar	0.53125	0.15625	0.53125	0.5
PD2	20	Plantar	0.580645	0.451613	0.580645	0.5			D2D5	20	Plantar	0.542857	0.0857143	0.542857	0.514286
PD2	20	Plantar	0.657143	0.0571429	0.657143	0.53125			D2D5	20	Plantar	0.515152	0.0909091	0.515152	0.527778
PD2	20	Plantar	0.5625	0.0285714	0.5625	0.527778			D2D5	20	Plantar	0.527778	0.0277778	0.527778	0.545455
PD2	20	Plantar	0.551724	0.103448	0.551724	0.527778			D2D5	20	Plantar	0.558824	0	0.558824	0.512821
Doff	11	Plantar	0.547619	0.166667	0.547619	0.525			D2D5	20	Plantar	0.548387	0.419355	0.548387	0.513514
Doff	11	Plantar	0.529412	0.147059	0.529412	0.566667			D2D5	20	Plantar	0.529412	0.470588	0.529412	0.517241
Doff	11	Plantar	0.517241	0.310345	0.517241	0.566667			D2D5	20	Plantar	0.513514	0.0555556	0.513514	0.576923
Doff	11	Plantar	0.518519	0.296296	0.518519	0.535714			D2D5	20	Plantar	0.5	0.0277778	0.5	0.5
Doff	11	Plantar	0.515152	0.272727	0.515152	0.53125			D2D5	20	Plantar	0.5	0.102564	0.5	0.542857
Doff	11	Plantar	0.5	0.266667	0.5	0.516129			D2D8	11	Plantar	0.594595	0.0810811	0.594595	0.538462
Doff	11	Plantar	0.575758	0.424242	0.575758	0.5			D2D8	11	Plantar	0.566667	0.0333333	0.566667	0.514286
Doff	11	Plantar	0.548387	0.322581	0.548387	0.551724			D2D8	11	Plantar	0.594595	0.351351	0.594595	0.5
Doff	11	Plantar	0.5	0.235294	0.5	0.517241			D2D8	11	Plantar	0.5	0.472222	0.5	0.5
Doff	11	Plantar	0.517241	0.275862	0.517241	0.5			D2D8	11	Plantar	0.605263	0.157895	0.605263	0.5
Doff	11	Plantar	0.517241	0.275862	0.517241	0.517241			D2D8	11	Plantar	0.542857	0.0285714	0.542857	0.575758
Doff	11	Plantar	0.555556	0.259259	0.555556	0.5			D2D8	11	Plantar	0.529412	0.205882	0.529412	0.548387
Doff	11	Plantar	0.538462	0.0769231	0.538462	0.5			D2D8	11	Plantar	0.516129	0.193548	0.516129	0.514286
Doff	11	Plantar	0.538462	0.0769231	0.538462	0.538462			D2D8	11	Plantar	0.526316	0.394737	0.526316	0.53125
Doff	20	Plantar	0.52	0.16	0.52	0.5			D2D8	11	Plantar	0.525	0.225	0.525	0.5
Doff	20	Plantar	0.538462	0.0769231	0.538462	0.571429			D2D8	11	Plantar	0.540541	0.405405	0.540541	0.558824
Doff	20	Plantar	0.517241	0.103448	0.517241	0.5			D2D8	11	Plantar	0.527778	0.222222	0.527778	0.5
Doff	20	Plantar	0.521739	0.037037	0.521739	0.518519			D2D8	11	Plantar	0.540541	0.0810811	0.540541	0.548387
Doff	20	Plantar	0.555556	0.037037	0.555556	0.541667			D2D8	20	Plantar	0.526316	0.08	0.526316	0.514286
Doff	20	Plantar	0.68	0.0740741	0.68	0.516129			D2D8	20	Plantar	0.52	0.228571	0.52	0.536585
Doff	20	Plantar	0.516129	0.193548	0.516129	0.535714			D2D8	20	Plantar	0.514286	0.129032	0.514286	0.612903
Doff	20	Plantar	0.53125	0.030303	0.53125	0.515152			D2D8	20	Plantar	0.518519	0.0357143	0.518519	0.516129
PD3	11	Plantar	0.580645	0.0645161	0.580645	0.515152			D2D8	20	Plantar	0.535714	0.0666667	0.535714	0.533333
PD3	11	Plantar	0.545455	0.151515	0.545455	0.515152			D2D8	20	Plantar	0.56	0.04	0.56	0.551724
PD3	11	Plantar	0.5625	0.03125	0.5625	0.527778			D2D8	20	Plantar	0.518519	0.0740741	0.518519	0.52
PD3	11	Plantar	0.517241	0.344828	0.517241	0.533333			D2D8	20	Plantar	0.5	0.178571	0.5	0.538462
PD3	11	Plantar	0.551724	0.344828	0.551724	0.517241			D2D8	20	Plantar	0.538462	0.230769	0.538462	0.52
PD3	11	Plantar	0.540541	0.378378	0.540541	0.575758			D2D8	20	Plantar	0.571429	0.25	0.571429	0.52
PD3	11	Plantar	0.580645	0.290323	0.580645	0.5625			D2D8	20	Plantar	0.517241	0.206897	0.517241	0.518519
PD3	11	Plantar	0.555556	0.0833333	0.555556	0.512821			D2D8	20	Plantar	0.5	0.214286	0.5	0.533333
PD3	11	Plantar	0.527778	0.0555556	0.527778	0.567568			D2D8	20	Plantar	0.565217	0.478261	0.565217	0.535714
PD3	11	Plantar	0.513514	0.108108	0.513514	0.5			D2D8	20	Plantar	0.518519	0.407407	0.518519	0.521739
PD3	11	Plantar	0.5	0.025	0.5	0.55814			D3D5	11	Plantar	0.555556	0.166667	0.555556	0.545455
PD3	20	Plantar	0.518519	0.111111	0.518519	0.518519			D3D5	11	Plantar	0.515152	0.121212	0.515152	0.555556
PD3	20	Plantar	0.518519	0.037037	0.518519	0.517241			D3D5	11	Plantar	0.517241	0.137931	0.517241	0.542857
PD3	20	Plantar	0.619048	0.0952381	0.619048	0.636364			D3D5	11	Plantar	0.518519	0.111111	0.518519	0.535714
PD3	20	Plantar	0.5	0.0666667	0.5	0.5			D3D5	11	Plantar	0.5	0.133333	0.5	0.52
PD3	20	Plantar	0.517241	0.0689655	0.517241	0.517241			D3D5	11	Plantar	0.571429	0.214286	0.571429	0.516129
PD3	20	Plantar	0.5	0.15625	0.5	0.516129			D3D5	11	Plantar	0.518519	0.222222	0.518519	0.5
PD3	20	Plantar	0.545455	0.121212	0.545455	0.551724			D3D5	11	Plantar	0.52	0.16	0.52	0.52
PD3	20	Plantar	0.5	0	0.5	0.516129			D3D5	11	Plantar	0.515152	0.272727	0.515152	0.521739
PD3	20	Plantar	0.535714	0.321429	0.535714	0.518519			D3D5	11	Plantar	0.5	0.2	0.5	0.533333
PD3	20	Plantar	0.576923	0.346154	0.576923	0.576923			D3D5	11	Plantar	0.571429	0.0714286	0.571429	0.518519
PD3	20	Plantar	0.516129	0.258065	0.516129	0.5			D3D5	11	Plantar	0.555556	0.148148	0.555556	0.540541
PD3	20	Plantar	0.52	0.36	0.52	0.59375			D3D5	11	Plantar	0.608696	0.148148	0.608696	0.64
PD3	20	Plantar	0.516129	0.322581	0.516129	0.533333			D3D5	20	Plantar	0.607143	0.25	0.607143	0.555556
PD3	20	Plantar	0.5	0.214286	0.5	0.53125			D3D5	20	Plantar	0.517241	0.206897	0.517241	0.5
PD2	20	Dorsal	0.678571	0.0714286	0.678571	0.592593			D3D5	20	Plantar	0.515152	0.0909091	0.515152	0.518519
PD2	20	Dorsal	0.533333	0	0.533333	0.517241			D3D5	20	Plantar	0.566667	0.366667	0.566667	0.580645
PD2	20	Dorsal	0.518519	0.0333333	0.518519	0.571429			D3D5	20	Plantar	0.566667	0.366667	0.566667	0.548387
PD2	20	Dorsal	0.592593	0.296296	0.592593	0.592593			D3D5	20	Plantar	0.5	0.125	0.5	0.5
PD2	20	Dorsal	0.529412	0.470588	0.529412	0.5			D3D5	20	Plantar	0.583333	0.125	0.583333	0.548387
PD2	20	Dorsal	0.527778	0.361111	0.527778	0.548387			D3D5	20	Plantar	0.62963	0.296296	0.62963	0.55
Doff	20	Dorsal	0.517241	0.172414	0.517241	0.5			D3D5	20	Plantar	0.533333	0.1	0.533333	0.555556
Doff	20	Dorsal	0.555556	0	0.555556	0.518519			D3D5	20	Plantar	0.533333	0.0666667	0.533333	0.517241
Doff	20	Dorsal	0.521739	0.130435	0.521739	0.576923			D3D5	20	Plantar	0.515152	0.363636	0.515152	0.515152
									D3D5	20	Plantar	0.517241	0.241379	0.517241	0.5
									D3D5	20	Plantar	0.612903	0.290323	0.612903	0.5
									D3D8	11	Plantar	0.615385	0.0384615	0.615385	0.516129
									D3D8	11	Plantar	0.517241	0.137931	0.517241	0.529412
									D3D8	11	Plantar	0.529412	0.411765	0.529412	0.538462
									D3D8	11	Plantar	0.655172	0.241379	0.655172	0.515152
									D3D8	11	Plantar	0.5	0.1	0.5	0.527778
									D3D8	11	Plantar	0.535714	0	0.535714	0.518519
									D3D8	11	Plantar	0.555556	0.111111	0.555556	0.538462
									D3D8	11	Plantar	0.535714	0.214286	0.535714	0.5
									D3D8	11	Plantar	0.5	0.205882	0.5	0.551724
									D3D8	11	Plantar	0.5	0.208333	0.5	0.5
									D3D8	20	Plantar	0.583333	0.125	0.583333	0.5
									D3D8	20	Plantar	0.52	0.08	0.52	0.541667
									D3D8	20	Plantar	0.516129	0.0967742	0.516129	0.5
									D3D8	20	Plantar	0.517241	0	0.517241	0.535714
									D3D8	20	Plantar	0.518519	0.0740741	0.518519	0.5
									D3D8	20	Plantar	0.5	0.1	0.5	0.538462
									D3D8	20	Plantar	0.535714	0.107143	0.535714	0.517241
									D3D8	20	Plantar	0.517241	0.137931	0.517241	0.518519
									D3D8	20	Plantar	0.555556	0.185185	0.555556	0.5
									D3D8	20	Plantar	0.518519	0.111111	0.518519	0.555556
									D3D8	20	Plantar	0.5	0.3125	0.5	0.551724
									D3D8	20	Plantar	0.517241	0.206897	0.517241	0.5
									D3D13	11	Plantar	0.538462	0.384615	0.538462	0.5
									D3D13	11	Plantar	0.615385	0.307692	0.615385	0.571429
									D3D13	11	Plantar	0.541667	0.166667	0.541667	0.535714
									D3D13	11	Plantar	0.545455	0.272727	0.545455	0.515152
									D3D13	11	Plantar	0.540541	0.189189	0.540541	0.516129
									D3D13	11	Plantar	0.514286	0.4	0.514286	0.526316
									D3D13	11	Plantar	0.5	0.40625	0.5	0.515152
									D3D13	11	Plantar	0.583333	0.0555556	0.583333	0.555556
									D3D13	11	Plantar	0.513514	0.216216	0.513514	0.595238
									D3D13	11	Plantar	0.53125	0.0625	0.53125	0.516129
									D3D13	11	Plantar	0.535714	0.107143	0.535714	0.516129
									D3D13	11	Plantar	0.551724	0.103448	0.551724	0.533333
									D3D13	11	Plantar	0.5	0.184211	0.5	0.517241
									D3D13	20	Plantar	0.515152	0.121212	0.515152	0.512195
									D3D13	20	Plantar	0.513514	0.097561	0.513514	0.529412
									D3D13	20	Plantar	0.538462	0.230769	0.538462	0.512195
									D3D13	20	Plantar	0.56	0.16	0.56	0.538462
									D3D13	20	Plantar	0.529412	0.117647	0.529412	0.518519
									D3D13	20	Plantar	0.517241	0	0.517241	0.533333
									D3D13	20	Plantar	0.5	0.0666667	0.5	0.517241
									D3D13	20	Plantar	0.516129	0.0606061	0.516129	0.5
									D3D13	20	Plantar	0.53125	0.21875	0.53125	0.515152
									D3D13	20	Plantar	0.5625	0.21875	0.5625	0.5
									D3D13	20	Plantar	0.533333	0.133333	0.533333	0.53125
									D3D13	20	Plantar	0.535714	0.0357143	0.535714	0.518519
									D2D5	20	Dorsal	0.5	0.34375	0.5	0.517241
									D3D5	20	Dorsal	0.545455	0.0606061	0.545455	0.5
									D3D5	20	Dorsal	0.576923	0.0967742	0.576923	0.5
	Average		0.543141	0.159666	0.543141	0.533744				Average		0.535275	0.177362	0.535275	0.526576
	St. Deviation		0.0436106	0.126605	0.0436106	0.0303101				St. Deviation		0.0310889	0.11683	0.0310889	0.02421
	Total Number Steps		79	79	79	79				Total Number Steps		131	131	131	131
	# of steps outside 2 S.D.		5	28	3	2				# of steps outside 2 S.D.		1	58	0	2

## Sheet: A.R. Pre-Injury Spatiotemporal
Time point	Animal ID	Swing Time	Stance Time	Stride Time	Stride Distance	Speed			Time point	Animal ID	Swing Time	Stance Time	Stride Time	Stride Distance	Speed
BL	11	0.16	0.27	0.43	13.7795	32.0454			D1D5	11	0.18	0.13	0.31	16.9041	68.091
BL	11	0.19	0.19	0.38	16.768	44.1262			D1D5	11	0.17	0.12	0.29	19.3458	78.7481
BL	11	0.17	0.14	0.31	16.2792	52.5134			D1D5	11	0.19	0.18	0.37	20.7987	50.3727
BL	11	0.21	0.17	0.38	18.1893	47.8666			D1D5	11	0.21	0.16	0.37	21.1702	50.375
BL	11	0.19	0.15	0.34	15.8535	46.6279			D1D5	11	0.19	0.15	0.34	21.7065	60.9669
BL	11	0.19	0.16	0.35	19.0277	54.3647			D1D5	11	0.2	0.11	0.31	21.917	62.8315
BL	11	0.16	0.13	0.29	17.4429	60.1478			D1D5	11	0.2	0.13	0.33	23.3073	65.8051
BL	11	0.18	0.11	0.29	18.6579	64.3377			D1D5	11	0.16	0.13	0.29	23.0753	65.3646
BL	11	0.15	0.11	0.26	15.8253	60.8665			D1D5	11	0.18	0.14	0.32	21.188	59.0572
BL	11	0.18	0.1	0.28	19.651	70.1823			D1D5	11	0.19	0.16	0.35	20.391	52.5243
BL	11	0.18	0.18	0.36	17.9967	49.9907			D1D5	20	0.16	0.15	0.31	21.523	62.2823
BL	11	0.19	0.17	0.36	17.9304	49.8068			D1D5	20	0.18	0.16	0.34	23.3501	61.9003
BL	20	0.16	0.2	0.36	16.5939	46.0943			D1D5	20	0.16	0.15	0.31	22.1874	64.1454
BL	20	0.14	0.19	0.33	15.9941	48.467			D1D5	20	0.14	0.12	0.26	23.6277	79.0008
BL	20	0.17	0.14	0.31	22.1161	69.1129			D1D5	20	0.15	0.15	0.3	18.5222	70.3687
BL	20	0.19	0.15	0.34	19.9419	58.6527			D1D5	20	0.15	0.16	0.31	17.4263	57.0858
BL	20	0.17	0.14	0.31	19.8037	63.8828			D1D5	20	0.15	0.13	0.28	18.1969	77.6503
BL	20	0.16	0.1	0.26	22.0781	84.9158			D1D5	20	0.17	0.17	0.34	14.2825	55.7753
BL	20	0.17	0.11	0.28	21.9434	78.3692			D1D5	20	0.16	0.15	0.31	19.9432	66.4931
BL	20	0.14	0.11	0.25	22.7296	90.9185			D1D8	11	0.21	0.16	0.37	20.0271	52.5069
BL	20	0.16	0.12	0.28	20.8741	74.5505			D1D8	11	0.24	0.21	0.45	19.9177	41.2475
BL	20	0.14	0.09	0.23	21.5936	93.8851			D1D8	11	0.19	0.14	0.33	19.7146	58.9117
PD1	11	0.22	0.23	0.45	18.6052	41.345			D1D8	11	0.18	0.16	0.34	21.0195	50.2345
PD1	11	0.17	0.25	0.42	16.0772	38.2791			D1D8	11	0.2	0.15	0.35	18.4612	57.2858
PD1	11	0.2	0.15	0.35	17.5394	50.1126			D1D8	11	0.18	0.17	0.35	23.6786	52.342
PD1	11	0.18	0.14	0.32	20.152	62.975			D1D8	11	0.18	0.14	0.32	17.8991	59.553
PD1	11	0.18	0.14	0.32	20.0884	62.7761			D1D8	11	0.16	0.09	0.25	12.8245	92.3106
PD1	11	0.19	0.15	0.34	19.4298	57.1464			D1D8	11	0.18	0.16	0.34	16.9669	54.6202
PD1	11	0.19	0.16	0.35	18.8275	53.7929			D1D8	11	0.16	0.13	0.29	20.538	66.1404
PD1	11	0.17	0.16	0.33	16.5084	50.0254			D1D8	20	0.14	0.1	0.24	20.348	84.5847
PD1	11	0.21	0.27	0.48	16.9331	35.2773			D1D8	20	0.16	0.13	0.29	20.2534	67.8392
PD1	11	0.19	0.17	0.36	18.3896	51.0822			D1D8	20	0.13	0.1	0.23	18.2131	91.8302
PD1	11	0.21	0.31	0.52	16.083	30.9288			D1D8	20	0.15	0.13	0.28	19.7153	71.2129
PD1	11	0.22	0.21	0.43	17.014	39.5675			D1D8	20	0.14	0.15	0.29	19.522	55.9959
PD1	20	0.17	0.19	0.36	16.662	46.2833			D1D8	20	0.15	0.1	0.25	17.9661	86.7481
PD1	20	0.17	0.17	0.34	19.7314	58.0335			D1D8	20	0.12	0.08	0.2	17.9123	111.794
PD1	20	0.15	0.31	0.46	16.0244	34.8356			D1D8	20	0.15	0.11	0.26	17.1118	80.1809
PD1	20	0.16	0.2	0.36	16.9047	46.9576			D1D8	20	0.15	0.1	0.25	17.9631	88.2149
PD1	20	0.16	0.16	0.32	15.6866	49.0207
PD1	20	0.18	0.2	0.38	17.4103	45.8166
PD1	20	0.13	0.16	0.29	17.049	58.7895
PD1	20	0.17	0.15	0.32	18.9594	59.2482
PD1	20	0.17	0.2	0.37	18.4442	49.8492
PD1	20	0.16	0.2	0.36	18.7361	52.0447
PD1	20	0.14	0.14	0.28	16.9293	60.4617
Post D1	11	0.14	0.27	0.41	17.5629	42.8363
Post D1	11	0.16	0.21	0.37	22.2441	60.1192
Post D1	11	0.16	0.17	0.33	22.0257	66.7446
Post D1	11	0.17	0.17	0.34	22.145	65.1323
Post D1	11	0.16	0.27	0.43	19.5044	45.3591
Post D1	11	0.16	0.25	0.41	19.6192	47.8516
Post D1	11	0.14	0.19	0.33	21.1387	64.0566
Post D1	11	0.16	0.16	0.32	23.1642	72.3881
Post D1	11	0.16	0.19	0.35	21.5304	61.5155
Post D1	11	0.15	0.16	0.31	22.7791	73.4809
Post D1	11	0.16	0.19	0.35	20.7014	59.1467
Post D1	11	0.16	0.19	0.35	21.8301	62.3717
Post D1	20	0.11	0.14	0.25	21.9775	87.9098
Post D1	20	0.13	0.13	0.26	22.4776	86.4524
Post D1	20	0.13	0.11	0.24	22.6683	94.4515
Post D1	20	0.12	0.12	0.24	20.6408	86.0033
Post D1	20	0.13	0.11	0.24	22.4812	93.6718
Post D1	20	0.13	0.09	0.22	21.544	97.9271
Post D1	20	0.13	0.12	0.25	23.7423	94.9691
Post D1	20	0.13	0.13	0.26	21.854	84.0538
Post D1	20	0.12	0.12	0.24	18.5415	77.2562
Post D1	20	0.15	0.16	0.31	22.0539	71.1416

## Sheet: A.R. Post-Injury Spatiotemporal
Time point	Animal ID	Plantar/Dorsal	Swing Time	Stance Time	Stride Time	Stride Distance	Speed			Time point	Animal ID	Plantar/Dorsal	Swing Time	Stance Time	Stride Time	Stride Distance	Speed
PD2	11	Plantar	0.09	0.22	0.31	16.5619	53.4253			D2D5	11	Plantar	0.11	0.26	0.37	13.1287	35.483
PD2	11	Plantar	0.11	0.21	0.32	15.5666	48.6458			D2D5	11	Plantar	0.15	0.25	0.4	16.3694	40.9234
PD2	11	Plantar	0.11	0.26	0.37	16.8884	45.6444			D2D5	11	Plantar	0.1	0.22	0.32	15.2939	47.7934
PD2	11	Plantar	0.11	0.23	0.34	16.6879	49.0821			D2D5	11	Plantar	0.12	0.16	0.28	18.0751	64.5539
PD2	11	Plantar	0.11	0.32	0.43	13.987	32.528			D2D5	11	Plantar	0.12	0.16	0.28	18.8506	67.3235
PD2	11	Plantar	0.09	0.26	0.35	14.0505	40.1443			D2D5	11	Plantar	0.11	0.24	0.35	15.8644	45.3268
PD2	11	Plantar	0.09	0.23	0.32	17.1502	53.5942			D2D5	11	Plantar	0.12	0.27	0.39	15.8386	40.6119
PD2	11	Plantar	0.1	0.23	0.33	17.8747	54.1657			D2D5	11	Plantar	0.13	0.28	0.41	15.117	36.8708
PD2	11	Plantar	0.1	0.21	0.31	18.2787	58.9635			D2D5	11	Plantar	0.11	0.23	0.34	16.2001	47.6473
PD2	11	Plantar	0.1	0.22	0.32	18.0066	56.2707			D2D5	11	Plantar	0.09	0.17	0.26	18.1878	69.9529
PD2	11	Plantar	0.11	0.23	0.34	19.137	56.2853			D2D5	11	Plantar	0.1	0.17	0.27	19.0985	70.7351
PD2	11	Plantar	0.1	0.2	0.3	17.8867	59.6223			D2D5	11	Plantar	0.12	0.15	0.27	18.5495	68.7018
PD2	11	Plantar	0.12	0.22	0.34	16.9069	49.7262			D2D5	11	Plantar	0.11	0.22	0.33	16.9698	51.4238
PD2	11	Plantar	0.13	0.2	0.33	18.4024	55.7648			D2D5	11	Plantar	0.1	0.2	0.3	16.8022	56.0073
PD2	20	Plantar	0.11	0.18	0.29	13.1451	45.328			D2D5	11	Plantar	0.11	0.19	0.3	17.4049	58.0164
PD2	20	Plantar	0.06	0.19	0.25	11.178	44.7121			D2D5	20	Plantar	0.09	0.26	0.35	11.6695	33.3414
PD2	20	Plantar	0.12	0.22	0.34	16.3188	47.9964			D2D5	20	Plantar	0.07	0.3	0.37	10.9479	29.589
PD2	20	Plantar	0.08	0.21	0.29	13.4379	46.3377			D2D5	20	Plantar	0.1	0.24	0.34	14.8218	43.5937
PD2	20	Plantar	0.09	0.32	0.41	12.6529	30.8608			D2D5	20	Plantar	0.08	0.24	0.32	12.7157	39.7365
PD2	20	Plantar	0.09	0.22	0.31	14.1155	45.5338			D2D5	20	Plantar	0.1	0.25	0.35	15.8832	45.3806
PD2	20	Plantar	0.15	0.2	0.35	12.694	36.2686			D2D5	20	Plantar	0.09	0.24	0.33	15.4321	46.7638
PD2	20	Plantar	0.09	0.23	0.32	12.6654	39.5795			D2D5	20	Plantar	0.11	0.25	0.36	14.9988	41.6632
PD2	20	Plantar	0.09	0.2	0.29	11.8816	40.9712			D2D5	20	Plantar	0.08	0.26	0.34	13.0239	38.3054
Doff	11	Plantar	0.12	0.3	0.42	15.1203	36.0008			D2D5	20	Plantar	0.09	0.22	0.31	12.9008	41.6155
Doff	11	Plantar	0.13	0.21	0.34	19.6451	57.7797			D2D5	20	Plantar	0.1	0.24	0.34	14.569	42.8499
Doff	11	Plantar	0.11	0.18	0.29	18.8087	64.8576			D2D5	20	Plantar	0.09	0.28	0.37	12.9633	35.0359
Doff	11	Plantar	0.1	0.17	0.27	17.3146	64.1282			D2D5	20	Plantar	0.11	0.25	0.36	15.7216	43.6711
Doff	11	Plantar	0.11	0.22	0.33	14.8729	45.0695			D2D5	20	Plantar	0.08	0.28	0.36	11.2333	31.2036
Doff	11	Plantar	0.11	0.19	0.3	16.7408	55.8027			D2D8	11	Plantar	0.13	0.24	0.37	18.4716	49.9234
Doff	11	Plantar	0.11	0.22	0.33	16.0655	48.6833			D2D8	11	Plantar	0.12	0.18	0.3	19.6331	65.4437
Doff	11	Plantar	0.1	0.21	0.31	15.7656	50.8569			D2D8	11	Plantar	0.11	0.26	0.37	16.1341	43.6058
Doff	11	Plantar	0.1	0.24	0.34	13.8636	40.7753			D2D8	11	Plantar	0.12	0.24	0.36	17.0967	47.4909
Doff	11	Plantar	0.09	0.2	0.29	16.4223	56.6286			D2D8	11	Plantar	0.11	0.27	0.38	17.2058	45.2785
Doff	11	Plantar	0.1	0.19	0.29	17.4942	60.3249			D2D8	11	Plantar	0.13	0.22	0.35	19.4796	55.656
Doff	11	Plantar	0.1	0.17	0.27	16.5991	61.4781			D2D8	11	Plantar	0.11	0.23	0.34	16.7288	49.2023
Doff	11	Plantar	0.11	0.15	0.26	18.0917	69.5836			D2D8	11	Plantar	0.1	0.21	0.31	17.2844	55.7561
Doff	11	Plantar	0.11	0.15	0.26	18.2756	70.2908			D2D8	11	Plantar	0.13	0.25	0.38	16.9844	44.6957
Doff	20	Plantar	0.08	0.17	0.25	17.4924	69.9698			D2D8	11	Plantar	0.13	0.27	0.4	16.2403	40.6007
Doff	20	Plantar	0.11	0.15	0.26	17.0072	65.4125			D2D8	11	Plantar	0.12	0.25	0.37	16.9146	45.7151
Doff	20	Plantar	0.1	0.19	0.29	17.6408	60.8305			D2D8	11	Plantar	0.13	0.23	0.36	17.7371	49.2696
Doff	20	Plantar	0.09	0.14	0.23	14.1761	61.6354			D2D8	11	Plantar	0.13	0.24	0.37	16.5652	44.7709
Doff	20	Plantar	0.11	0.16	0.27	15.7512	58.3377			D2D8	20	Plantar	0.09	0.29	0.38	14.4467	38.0175
Doff	20	Plantar	0.09	0.16	0.25	14.0347	56.1387			D2D8	20	Plantar	0.09	0.16	0.25	9.81885	39.2754
Doff	20	Plantar	0.08	0.23	0.31	15.736	50.7612			D2D8	20	Plantar	0.12	0.23	0.35	16.3514	46.7182
Doff	20	Plantar	0.1	0.22	0.32	17.2665	53.9577			D2D8	20	Plantar	0.09	0.18	0.27	16.9741	62.8671
PD3	11	Plantar	0.1	0.21	0.31	17.5071	56.4744			D2D8	20	Plantar	0.09	0.19	0.28	15.9875	57.0982
PD3	11	Plantar	0.12	0.21	0.33	17.1591	51.9974			D2D8	20	Plantar	0.1	0.15	0.25	17.5312	70.1249
PD3	11	Plantar	0.12	0.2	0.32	17.0102	53.157			D2D8	20	Plantar	0.11	0.16	0.27	18.6018	68.8955
PD3	11	Plantar	0.09	0.2	0.29	16.9284	58.3739			D2D8	20	Plantar	0.08	0.2	0.28	16.9769	60.6319
PD3	11	Plantar	0.08	0.21	0.29	15.0787	51.9954			D2D8	20	Plantar	0.08	0.18	0.26	17.4217	67.0066
PD3	11	Plantar	0.13	0.24	0.37	15.3115	41.3825			D2D8	20	Plantar	0.09	0.19	0.28	15.387	54.9536
PD3	11	Plantar	0.1	0.21	0.31	15.5519	50.1676			D2D8	20	Plantar	0.08	0.21	0.29	15.4516	53.2815
PD3	11	Plantar	0.12	0.24	0.36	17.6557	49.0435			D2D8	20	Plantar	0.09	0.19	0.28	17.2214	61.5051
PD3	11	Plantar	0.11	0.25	0.36	16.4214	45.6151			D2D8	20	Plantar	0.08	0.15	0.23	16.7979	73.0346
PD3	11	Plantar	0.13	0.24	0.37	17.0992	46.214			D2D8	20	Plantar	0.1	0.17	0.27	18.0301	66.778
PD3	11	Plantar	0.12	0.28	0.4	16.3118	40.7796			D3D5	11	Plantar	0.12	0.24	0.36	16.8922	46.9227
PD3	20	Plantar	0.09	0.18	0.27	17.0624	63.194			D3D5	11	Plantar	0.11	0.22	0.33	16.8186	50.9656
PD3	20	Plantar	0.09	0.18	0.27	16.8666	62.4687			D3D5	11	Plantar	0.1	0.19	0.29	18.2948	63.0855
PD3	20	Plantar	0.09	0.33	0.42	15.6622	37.2909			D3D5	11	Plantar	0.12	0.15	0.27	19.6445	72.7574
PD3	20	Plantar	0.09	0.21	0.3	16.4475	54.825			D3D5	11	Plantar	0.09	0.21	0.3	17.5833	58.6109
PD3	20	Plantar	0.09	0.2	0.29	15.8538	54.6683			D3D5	11	Plantar	0.12	0.16	0.28	17.4234	62.2265
PD3	20	Plantar	0.09	0.23	0.32	13.6751	42.7346			D3D5	11	Plantar	0.08	0.19	0.27	15.998	59.2518
PD3	20	Plantar	0.12	0.21	0.33	15.7832	47.8278			D3D5	11	Plantar	0.09	0.16	0.25	17.5244	70.0978
PD3	20	Plantar	0.1	0.2	0.3	16.3245	54.4148			D3D5	11	Plantar	0.12	0.21	0.33	15.8321	47.9761
PD3	20	Plantar	0.11	0.17	0.28	16.356	58.4143			D3D5	11	Plantar	0.12	0.18	0.3	17.7032	59.0105
PD3	20	Plantar	0.09	0.17	0.26	15.1196	58.1525			D3D5	11	Plantar	0.09	0.19	0.28	13.9495	49.8196
PD3	20	Plantar	0.09	0.22	0.31	15.1254	48.7916			D3D5	11	Plantar	0.11	0.16	0.27	18.1898	67.3697
PD3	20	Plantar	0.1	0.15	0.25	10.6916	42.7666			D3D5	11	Plantar	0.09	0.14	0.23	15.2897	66.477
PD3	20	Plantar	0.1	0.21	0.31	15.0186	48.4469			D3D5	20	Plantar	0.07	0.21	0.28	13.7172	48.9899
PD3	20	Plantar	0.09	0.19	0.28	16.3248	58.3028			D3D5	20	Plantar	0.06	0.23	0.29	11.7682	40.5801
PD3	20	Dorsal	0.12	0.16	0.28	12.2823	43.8652			D3D5	20	Plantar	0.09	0.24	0.33	13.135	39.8029
PD3	20	Dorsal	0.1	0.2	0.3	17.8592	59.5306			D3D5	20	Plantar	0.1	0.2	0.3	15.5414	51.8046
PD3	20	Dorsal	0.11	0.16	0.27	14.9817	55.4878			D3D5	20	Plantar	0.08	0.22	0.3	13.4931	44.9769
PD3	20	Dorsal	0.1	0.17	0.27	12.8659	47.6516			D3D5	20	Plantar	0.1	0.22	0.32	13.372	41.7875
PD3	20	Dorsal	0.1	0.24	0.34	13.9608	41.0613			D3D5	20	Plantar	0.06	0.18	0.24	6.66443	27.7685
PD3	20	Dorsal	0.09	0.27	0.36	10.8664	30.1845			D3D5	20	Plantar	0.13	0.14	0.27	9.55454	35.3872
PD3	20	Dorsal	0.1	0.19	0.29	18.3308	63.2096			D3D5	20	Plantar	0.09	0.21	0.3	14.595	48.65
PD3	20	Dorsal	0.11	0.16	0.27	14.6616	54.3024			D3D5	20	Plantar	0.07	0.23	0.3	12.5292	41.764
PD3	20	Dorsal	0.07	0.16	0.23	13.7487	59.7768			D3D5	20	Plantar	0.09	0.24	0.33	14.2284	43.1164
										D3D5	20	Plantar	0.07	0.22	0.29	12.586	43.4002
										D3D5	20	Plantar	0.08	0.23	0.31	12.4138	40.0446
										D3D8	11	Plantar	0.08	0.18	0.26	16.4705	63.348
										D3D8	11	Plantar	0.12	0.17	0.29	20.1162	69.3662
										D3D8	11	Plantar	0.13	0.21	0.34	16.5961	48.8121
										D3D8	11	Plantar	0.09	0.2	0.29	15.3904	53.0704
										D3D8	11	Plantar	0.12	0.18	0.3	18.861	62.8701
										D3D8	11	Plantar	0.12	0.16	0.28	19.6433	70.1547
										D3D8	11	Plantar	0.1	0.17	0.27	19.3738	71.7549
										D3D8	11	Plantar	0.1	0.18	0.28	16.7089	59.6745
										D3D8	11	Plantar	0.12	0.22	0.34	18.1032	53.2446
										D3D8	11	Plantar	0.09	0.15	0.24	18.5794	77.414
										D3D8	20	Plantar	0.1	0.14	0.24	18.9071	78.7797
										D3D8	20	Plantar	0.09	0.16	0.25	17.3781	69.5123
										D3D8	20	Plantar	0.1	0.21	0.31	16.6463	53.6979
										D3D8	20	Plantar	0.1	0.19	0.29	18.2926	63.0778
										D3D8	20	Plantar	0.09	0.18	0.27	16.9644	62.8311
										D3D8	20	Plantar	0.1	0.2	0.3	18.2399	60.7998
										D3D8	20	Plantar	0.09	0.19	0.28	17.9567	64.131
										D3D8	20	Plantar	0.1	0.19	0.29	17.6324	60.8014
										D3D8	20	Plantar	0.11	0.16	0.27	16.4747	61.0172
										D3D8	20	Plantar	0.1	0.17	0.27	16.7737	62.1247
										D3D8	20	Plantar	0.1	0.22	0.32	15.2458	47.6432
										D3D8	20	Plantar	0.09	0.2	0.29	15.9145	54.8776
										D3D13	11	Plantar	0.11	0.15	0.26	17.1524	65.9707
										D3D13	11	Plantar	0.1	0.16	0.26	17.1893	66.1127
										D3D13	11	Plantar	0.08	0.16	0.24	16.0728	66.9701
										D3D13	11	Plantar	0.1	0.23	0.33	17.0771	51.7488
										D3D13	11	Plantar	0.12	0.25	0.37	16.3777	44.264
										D3D13	11	Plantar	0.11	0.24	0.35	17.143	48.9799
										D3D13	11	Plantar	0.1	0.22	0.32	17.004	53.1374
										D3D13	11	Plantar	0.07	0.29	0.36	11.4708	31.8633
										D3D13	11	Plantar	0.12	0.25	0.37	17.3977	47.0208
										D3D13	11	Plantar	0.11	0.21	0.32	19.3857	60.5802
										D3D13	11	Plantar	0.11	0.17	0.28	18.4572	65.9185
										D3D13	11	Plantar	0.11	0.18	0.29	19.0224	65.5946
										D3D13	11	Plantar	0.11	0.27	0.38	17.1537	45.1414
										D3D13	20	Plantar	0.09	0.24	0.33	14.7259	44.6241
										D3D13	20	Plantar	0.09	0.28	0.37	11.5649	31.2564
										D3D13	20	Plantar	0.1	0.16	0.26	16.5179	63.5305
										D3D13	20	Plantar	0.09	0.16	0.25	17.5703	70.2812
										D3D13	20	Plantar	0.1	0.24	0.34	16.8106	49.4429
										D3D13	20	Plantar	0.1	0.19	0.29	18.1374	62.5428
										D3D13	20	Plantar	0.09	0.21	0.3	16.3677	54.559
										D3D13	20	Plantar	0.09	0.22	0.31	14.9145	48.1113
										D3D13	20	Plantar	0.09	0.23	0.32	15.6728	48.9774
										D3D13	20	Plantar	0.09	0.23	0.32	15.5495	48.5923
										D3D13	20	Plantar	0.1	0.2	0.3	16.5584	55.1948
										D3D13	20	Plantar	0.1	0.18	0.28	16.9408	60.5028
										D2D5	20	Dorsal	0.11	0.21	0.32	17.4169	54.4279
										D3D5	20	Dorsal	0.11	0.22	0.33	14.1636	42.9201
										D3D5	20	Dorsal	0.1	0.16	0.26	11.217	43.1425
