# Supplementary material for: Silencing long-descending inter-enlargement propriospinal neurons improves hindlimb stepping after contusive spinal cord injuries
Source: eLife. 2023 Dec 15;12:e82944. doi: 10.7554/eLife.82944 (PMC10776087; doi:10.7554/eLife.82944)
Supplement: Figure 9—source data 1. [file elife-82944-fig9-data1.xlsx]

## Sheet: Postural Stability
Animal ID	Control Left Gait Angle	Dox Left Gait Angle	Control Right Gait Angle	Dox Right Gait Angle	Control Rear Track Width	Dox Rear Track Width	Control Diagonal Length	Dox Diagonal Length	Control Left Foot Slips	Dox Left Foot Slips	Control Right Foot Slips	Dox Right Foot Slips
2	31.7644	29.322	30.39	33.83	4.62	4.58	8.12	5.91	8.67	6.76	8.8	6.72
3	29.1329	26.252	36.08	28.53	4.81	4.19	7.79	5.34	7.93	4.84	6.8	4.84
4	41.3887	32.011	27.69	27.79	3.69	3.36	9.64	7.8	9.6	7.48	9.73	7.48
9	36.492	30.928	30.75	28.28	4.58	4.51	8.59	4.74	8.07	6.96	9.53	7.64
12	34.819	28.052	33.52	33.5	3.99	3.83	7.93	7.12	8.8	6.2	9.13	6.84
15	32.2575	30.252	36.91	30.32	4.79	4.52	8.87	4.93	9	6.24	5.2	4.2
16	32.5755	27.629	31.08	28.16	4.92	4.39	7.97	5.13	6.33	5.2	6.73	4.64
19	40.0975	35.161	40.52	32.4	4.99	4.41	10.7	7.03	10.27	7	10.73	7.52
Average	34.816	29.9509	33.3675	30.3513	4.54875	4.22375	8.70125	6	8.58375	6.335	8.33125	6.235
StDev	4.26077	2.816	4.21345	2.54062	0.465171	0.424464	1.01523	1.16425	1.1877	0.916125	1.87916	1.43466
