# Supplementary material for: Silencing long-descending inter-enlargement propriospinal neurons improves hindlimb stepping after contusive spinal cord injuries
Source: eLife. 2023 Dec 15;12:e82944. doi: 10.7554/eLife.82944 (PMC10776087; doi:10.7554/eLife.82944)
Supplement: Figure 11—source data 1. — These data are for post-injury with and without doxycycline (Dox). [file elife-82944-fig11-data1.xlsx]

## Sheet: Spatiotemporal
Time point	Animal ID	Plantar/Dorsal	Swing Time	Stance Time	Stride Time	Stride Distance	Speed			Time point	Animal ID	Plantar/Dorsal	Swing Time	Stance Time	Stride Time	Stride Distance	Speed
PD2	2	Plantar	0.1	0.14	0.24	17.4483	72.7012			D2D5	2	Plantar	0.15	0.3	0.45	13.5674	30.1498
PD2	2	Plantar	0.08	0.21	0.29	14.6612	50.5559			D2D5	2	Plantar	0.09	0.2	0.29	15.0618	51.9373
PD2	2	Plantar	0.08	0.22	0.3	17.6199	58.733			D2D5	2	Plantar	0.1	0.28	0.38	13.2626	34.9016
PD2	2	Plantar	0.09	0.19	0.28	18.3304	65.4657			D2D5	2	Plantar	0.09	0.14	0.23	18.4531	80.2308
PD2	2	Plantar	0.13	0.2	0.33	18.0326	54.6443			D2D5	2	Plantar	0.08	0.14	0.22	19.2825	87.6477
PD2	2	Plantar	0.1	0.24	0.34	15.6186	45.9372			D2D5	2	Plantar	0.12	0.23	0.35	16.4229	46.9226
PD2	2	Plantar	0.09	0.14	0.23	21.9034	95.2321			D2D5	2	Plantar	0.1	0.23	0.33	15.1714	45.9741
PD2	2	Plantar	0.07	0.12	0.19	13.857	72.9314			D2D5	2	Plantar	0.09	0.19	0.28	16.8514	60.1837
PD2	3	Plantar	0.1	0.2	0.3	16.3388	54.4628			D2D5	2	Plantar	0.08	0.16	0.24	17.8759	74.4829
PD2	3	Plantar	0.12	0.17	0.29	19.2029	66.217			D2D5	2	Plantar	0.16	0.15	0.31	18.3053	59.0493
PD2	3	Plantar	0.06	0.32	0.38	11.2308	29.5546			D2D5	2	Plantar	0.07	0.12	0.19	10.538	55.463
PD2	3	Plantar	0.12	0.22	0.34	15.1703	44.6186			D2D5	3	Plantar	0.11	0.21	0.32	14.0839	44.0121
PD2	3	Plantar	0.14	0.19	0.33	18.7839	56.921			D2D5	3	Plantar	0.1	0.25	0.35	14.9082	42.5949
PD2	3	Plantar	0.11	0.11	0.22	15.602	70.918			D2D5	3	Plantar	0.11	0.22	0.33	18.0888	54.8144
PD2	3	Plantar	0.1	0.12	0.22	17.0332	77.4235			D2D5	3	Plantar	0.09	0.19	0.28	15.2891	54.6039
PD2	3	Plantar	0.11	0.11	0.22	18.7839	85.3816			D2D5	3	Plantar	0.13	0.13	0.26	17.5105	67.3483
PD2	3	Plantar	0.11	0.13	0.24	15.8801	66.1671			D2D5	3	Plantar	0.1	0.3	0.4	12.0519	30.1299
PD2	3	Plantar	0.1	0.16	0.26	18.1368	69.757			D2D5	3	Plantar	0.09	0.28	0.37	14.0113	37.8684
PD2	3	Plantar	0.12	0.14	0.26	18.7163	71.9856			D2D5	3	Plantar	0.11	0.22	0.33	13.4627	40.7962
PD2	4	Plantar	0.13	0.27	0.4	15.3159	38.2898			D2D5	3	Plantar	0.09	0.25	0.34	14.2587	41.9373
PD2	9	Plantar	0.16	0.19	0.35	16.5888	47.3965			D2D5	3	Plantar	0.1	0.12	0.22	18.8323	85.6012
PD2	9	Plantar	0.08	0.15	0.23	18.3746	79.8898			D2D5	3	Plantar	0.09	0.14	0.23	15.8976	69.12
PD2	9	Plantar	0.08	0.14	0.22	18.4613	83.915			D2D5	3	Plantar	0.11	0.19	0.3	15.7439	52.4797
PD2	9	Plantar	0.07	0.23	0.3	13.8763	46.2542			D2D5	3	Plantar	0.11	0.16	0.27	16.3641	60.6079
PD2	9	Plantar	0.07	0.2	0.27	15.2349	56.4254			D2D5	3	Plantar	0.1	0.2	0.3	13.6645	45.5483
PD2	12	Plantar	0.08	0.16	0.24	13.0165	54.2353			D2D5	4	Plantar	0.12	0.26	0.38	14.1137	37.1413
PD2	12	Plantar	0.12	0.09	0.21	14.4424	68.7736			D2D5	4	Plantar	0.11	0.22	0.33	16.4946	49.9837
PD2	12	Plantar	0.06	0.17	0.23	10.3036	44.7981			D2D5	4	Plantar	0.1	0.25	0.35	10.2288	29.2251
PD2	12	Plantar	0.04	0.17	0.21	10.3965	49.5071			D2D5	4	Plantar	0.13	0.22	0.35	12.7168	36.3338
PD2	12	Plantar	0.09	0.18	0.27	15.666	58.0222			D2D5	4	Plantar	0.07	0.24	0.31	9.93525	32.0492
PD2	12	Plantar	0.08	0.2	0.28	12.1914	43.5406			D2D5	4	Plantar	0.09	0.21	0.3	12.6588	42.1959
PD2	15	Plantar	0.12	0.24	0.36	16.3344	45.3733			D2D5	4	Plantar	0.09	0.18	0.27	8.10391	30.0145
PD2	15	Plantar	0.11	0.26	0.37	15.6228	42.2237			D2D5	4	Plantar	0.09	0.26	0.35	13.5231	38.6373
PD2	15	Plantar	0.1	0.26	0.36	13.9474	38.7429			D2D5	4	Plantar	0.14	0.24	0.38	16.7332	44.0348
PD2	15	Plantar	0.13	0.18	0.31	15.816	51.0192			D2D5	9	Plantar	0.04	0.17	0.21	10.9154	51.9782
PD2	15	Plantar	0.09	0.24	0.33	14.954	45.3151			D2D5	9	Plantar	0.09	0.21	0.3	14.3036	47.6787
PD2	15	Plantar	0.1	0.19	0.29	17.238	59.4413			D2D5	9	Plantar	0.09	0.16	0.25	14.8794	59.5175
PD2	15	Plantar	0.1	0.2	0.3	18.4637	61.5456			D2D5	9	Plantar	0.12	0.16	0.28	19.6568	70.2027
PD2	16	Plantar	0.11	0.18	0.29	17.8711	61.6245			D2D5	9	Plantar	0.1	0.18	0.28	17.1087	61.1026
PD2	16	Plantar	0.11	0.21	0.32	16.7869	52.459			D2D5	9	Plantar	0.09	0.22	0.31	14.9248	48.1446
PD2	16	Plantar	0.1	0.3	0.4	13.0322	32.5805			D2D5	9	Plantar	0.1	0.24	0.34	11.9303	35.0892
PD2	16	Plantar	0.11	0.21	0.32	16.2536	50.7924			D2D5	9	Plantar	0.06	0.18	0.24	11.6411	46.5643
PD2	16	Plantar	0.12	0.21	0.33	19.0281	57.661			D2D5	9	Plantar	0.09	0.16	0.25	15.1186	55.9949
PD2	16	Plantar	0.1	0.17	0.27	15.6732	58.0487			D2D5	12	Plantar	0.1	0.18	0.28	13.501	48.218
PD2	16	Plantar	0.08	0.18	0.26	17.0946	65.7484			D2D5	12	Plantar	0.1	0.27	0.37	13.67	36.9459
PD2	16	Plantar	0.11	0.18	0.29	17.7364	61.16			D2D5	12	Plantar	0.13	0.22	0.35	15.1318	43.2337
PD2	16	Plantar	0.1	0.19	0.29	15.1634	52.2876			D2D5	12	Plantar	0.11	0.3	0.41	11.4235	27.8622
PD2	16	Plantar	0.13	0.18	0.31	17.4803	56.3882			D2D5	12	Plantar	0.09	0.2	0.29	13.8737	47.8403
PD2	16	Plantar	0.11	0.21	0.32	18.8488	58.9026			D2D5	12	Plantar	0.11	0.2	0.31	16.1294	52.0303
PD2	16	Plantar	0.1	0.14	0.24	16.7969	69.9871			D2D5	12	Plantar	0.06	0.19	0.25	11.3452	45.3806
PD2	16	Plantar	0.09	0.18	0.27	18.8647	69.8691			D2D5	12	Plantar	0.09	0.22	0.31	12.5387	40.4475
Doff	2	Plantar	0.1	0.19	0.29	16.1436	53.8121			D2D5	12	Plantar	0.11	0.23	0.34	16.0106	47.0901
Doff	2	Plantar	0.1	0.15	0.25	18.5042	74.0168			D2D5	12	Plantar	0.1	0.22	0.32	16.064	50.1999
Doff	2	Plantar	0.11	0.17	0.28	18.0799	64.571			D2D5	12	Plantar	0.1	0.24	0.34	14.7498	43.3816
Doff	2	Plantar	0.06	0.16	0.22	14.094	64.0639			D2D5	12	Plantar	0.1	0.27	0.37	12.9035	34.8743
Doff	2	Plantar	0.08	0.13	0.21	18.1362	86.3628			D2D5	12	Plantar	0.06	0.21	0.27	11.2933	41.827
Doff	2	Plantar	0.1	0.15	0.25	18.811	75.2438			D2D5	15	Plantar	0.17	0.26	0.43	15.2588	35.4857
Doff	2	Plantar	0.07	0.16	0.23	16.5092	71.7792			D2D5	15	Plantar	0.12	0.37	0.49	12.8792	26.2842
Doff	2	Plantar	0.09	0.19	0.28	14.5889	52.1033			D2D5	15	Plantar	0.14	0.41	0.55	14.5524	26.4589
Doff	3	Plantar	0.11	0.17	0.28	15.6975	56.0625			D2D5	15	Plantar	0.15	0.35	0.5	14.3123	28.6246
Doff	3	Plantar	0.11	0.18	0.29	19.0278	65.6132			D2D5	15	Plantar	0.15	0.28	0.43	17.9984	41.8567
Doff	3	Plantar	0.11	0.15	0.26	19.8487	76.3412			D2D5	15	Plantar	0.18	0.28	0.46	14.6968	31.9496
Doff	3	Plantar	0.12	0.16	0.28	18.4253	65.8048			D2D5	15	Plantar	0.1	0.23	0.33	11.7495	35.6046
Doff	3	Plantar	0.1	0.14	0.24	18.0176	75.0732			D2D5	15	Plantar	0.13	0.26	0.39	14.8015	37.9526
Doff	3	Plantar	0.11	0.19	0.3	16.3812	54.604			D2D5	15	Plantar	0.15	0.27	0.42	14.3112	34.0743
Doff	3	Plantar	0.08	0.29	0.37	13.6557	36.9072			D2D5	15	Plantar	0.14	0.26	0.4	10.9989	27.4973
Doff	3	Plantar	0.1	0.18	0.28	15.1546	54.1237			D2D5	15	Plantar	0.11	0.26	0.37	13.6249	36.8241
Doff	3	Plantar	0.09	0.15	0.24	17.7675	74.0312			D2D5	16	Plantar	0.11	0.31	0.42	12.7522	30.3623
Doff	3	Plantar	0.09	0.28	0.37	15.0778	40.7509			D2D5	16	Plantar	0.09	0.35	0.44	12.5987	28.6335
Doff	3	Plantar	0.09	0.16	0.25	15.5507	62.2029			D2D5	16	Plantar	0.11	0.28	0.39	12.729	32.6384
Doff	4	Plantar	0.16	0.22	0.38	16.3387	42.9966			D2D5	16	Plantar	0.12	0.33	0.45	14.054	31.2312
Doff	4	Plantar	0.12	0.21	0.33	13.1489	39.845			D2D5	16	Plantar	0.1	0.23	0.33	15.2155	46.1077
Doff	4	Plantar	0.13	0.25	0.38	16.1567	42.5175			D2D5	16	Plantar	0.08	0.26	0.34	12.1049	35.6028
Doff	4	Plantar	0.1	0.19	0.29	15.3009	52.7616			D2D5	16	Plantar	0.13	0.24	0.37	16.7289	45.2132
Doff	4	Plantar	0.16	0.63	0.79	11.8225	22.3067			D2D5	16	Plantar	0.07	0.23	0.3	12.223	40.7434
Doff	4	Plantar	0.11	0.4	0.51	10.7738	14.5593			D2D5	16	Plantar	0.07	0.21	0.28	14.1782	50.6366
Doff	4	Plantar	0.12	0.27	0.39	11.3036	21.7377			D2D5	16	Plantar	0.09	0.21	0.3	15.5352	51.784
Doff	4	Plantar	0.12	0.2	0.32	16.6593	52.0605			D2D5	16	Plantar	0.09	0.14	0.23	17.0393	74.0839
Doff	4	Plantar	0.1	0.18	0.28	13.8799	49.5711			D2D5	16	Plantar	0.09	0.15	0.24	16.8737	70.3073
Doff	9	Plantar	0.09	0.18	0.27	15.9045	58.9054			D2D5	16	Plantar	0.08	0.17	0.25	15.6965	62.786
Doff	9	Plantar	0.1	0.16	0.26	17.3231	66.6274			D2D5	19	Plantar	0.14	0.17	0.31	13.6478	44.0253
Doff	9	Plantar	0.09	0.17	0.26	13.9291	53.5735			D2D5	19	Plantar	0.1	0.21	0.31	16.885	54.4676
Doff	9	Plantar	0.13	0.2	0.33	17.819	53.9969			D2D5	19	Plantar	0.1	0.15	0.25	14.7342	58.9368
Doff	9	Plantar	0.08	0.17	0.25	12.3122	49.2487			D2D5	19	Plantar	0.13	0.33	0.46	19.5606	42.523
Doff	9	Plantar	0.09	0.18	0.27	14.9104	55.2236			D2D5	19	Plantar	0.09	0.26	0.35	12.7016	36.2904
Doff	9	Plantar	0.12	0.16	0.28	15.7775	56.3484			D2D5	19	Plantar	0.13	0.11	0.24	17.7483	73.9512
Doff	9	Plantar	0.09	0.25	0.34	15.2826	44.9488			D2D5	19	Plantar	0.09	0.13	0.22	12.6251	57.387
Doff	9	Plantar	0.07	0.24	0.31	7.2824	23.4916			D2D5	19	Plantar	0.11	0.12	0.23	12.5963	54.7663
Doff	9	Plantar	0.08	0.36	0.44	11.7608	26.7292			D2D5	19	Plantar	0.07	0.21	0.28	12.654	45.1929
Doff	9	Plantar	0.06	0.13	0.19	6.14482	32.3412			D2D5	19	Plantar	0.13	0.2	0.33	13.1868	39.9601
Doff	12	Plantar	0.12	0.3	0.42	13.7688	32.7828			D2D5	19	Plantar	0.13	0.22	0.35	16.0653	45.9009
Doff	12	Plantar	0.11	0.18	0.29	14.3522	49.4905			D2D5	19	Plantar	0.13	0.12	0.25	16.3741	65.4963
Doff	12	Plantar	0.09	0.21	0.3	15.0542	50.1807			D2D5	19	Plantar	0.06	0.14	0.2	14.4129	72.0645
Doff	12	Plantar	0.1	0.25	0.35	15.2364	43.5325			D2D8	2	Plantar	0.09	0.16	0.25	18.5674	74.2698
Doff	12	Plantar	0.07	0.2	0.27	10.5165	38.95			D2D8	2	Plantar	0.1	0.17	0.27	19.4132	71.9007
Doff	12	Plantar	0.08	0.25	0.33	14.8446	44.9836			D2D8	2	Plantar	0.08	0.22	0.3	15.8589	52.8631
Doff	12	Plantar	0.07	0.18	0.25	14.4597	57.8387			D2D8	2	Plantar	0.08	0.15	0.23	14.3912	62.5702
Doff	12	Plantar	0.09	0.16	0.25	11.2292	44.9168			D2D8	2	Plantar	0.11	0.28	0.39	16.8369	43.1715
Doff	15	Plantar	0.11	0.29	0.4	10.6886	26.7215			D2D8	2	Plantar	0.07	0.17	0.24	15.799	65.829
Doff	15	Plantar	0.14	0.3	0.44	13.2576	30.1308			D2D8	2	Plantar	0.12	0.17	0.29	19.1971	66.1968
Doff	15	Plantar	0.13	0.26	0.39	14.6239	37.4971			D2D8	2	Plantar	0.07	0.16	0.23	14.0244	60.9759
Doff	15	Plantar	0.11	0.18	0.29	17.1229	59.0446			D2D8	2	Plantar	0.1	0.14	0.24	17.3825	72.4269
Doff	15	Plantar	0.12	0.17	0.29	17.4775	64.7313			D2D8	2	Plantar	0.09	0.14	0.23	20.3066	88.2894
Doff	15	Plantar	0.11	0.18	0.29	15.8811	63.5244			D2D8	2	Plantar	0.11	0.18	0.29	18.3538	63.289
Doff	15	Plantar	0.09	0.2	0.29	16.3825	60.676			D2D8	2	Plantar	0.1	0.18	0.28	16.7114	59.6837
Doff	15	Plantar	0.1	0.24	0.34	13.034	38.3352			D2D8	2	Plantar	0.09	0.25	0.34	13.7206	40.3546
Doff	16	Plantar	0.1	0.17	0.27	18.4251	68.2413			D2D8	2	Plantar	0.1	0.12	0.22	17.8035	80.925
Doff	16	Plantar	0.11	0.22	0.33	15.2923	46.3403			D2D8	2	Plantar	0.09	0.15	0.24	19.0238	79.2657
Doff	16	Plantar	0.09	0.28	0.37	13.7427	37.1424			D2D8	3	Plantar	0.1	0.14	0.24	18.8549	78.5621
Doff	16	Plantar	0.1	0.2	0.3	15.9477	53.159			D2D8	3	Plantar	0.06	0.11	0.17	16.0929	94.6642
Doff	16	Plantar	0.09	0.25	0.34	13.8021	40.5943			D2D8	3	Plantar	0.11	0.16	0.27	20.6807	76.595
Doff	16	Plantar	0.08	0.13	0.21	17.1286	81.5649			D2D8	3	Plantar	0.14	0.12	0.26	21.6493	83.2665
Doff	16	Plantar	0.09	0.1	0.19	20.4088	107.415			D2D8	3	Plantar	0.09	0.15	0.24	16.4844	68.6851
Doff	16	Plantar	0.11	0.17	0.28	16.1617	57.7205			D2D8	3	Plantar	0.11	0.15	0.26	19.2613	74.082
Doff	16	Plantar	0.09	0.18	0.27	14.7544	54.6459			D2D8	3	Plantar	0.1	0.15	0.25	17.7781	71.1123
Doff	16	Plantar	0.1	0.16	0.26	18.8177	72.3758			D2D8	3	Plantar	0.12	0.16	0.28	17.6043	62.8725
Doff	16	Plantar	0.08	0.13	0.21	15.9491	75.9483			D2D8	3	Plantar	0.08	0.09	0.17	18.6157	109.504
Doff	16	Plantar	0.08	0.12	0.2	17.4481	87.2405			D2D8	3	Plantar	0.08	0.1	0.18	18.0854	100.474
Doff	19	Plantar	0.1	0.18	0.28	15.118	53.9928			D2D8	3	Plantar	0.11	0.15	0.26	18.1672	69.8739
Doff	19	Plantar	0.06	0.12	0.18	9.41044	52.2802			D2D8	3	Plantar	0.11	0.15	0.26	18.9541	72.9003
Doff	19	Plantar	0.07	0.24	0.31	12.4431	40.139			D2D8	4	Plantar	0.11	0.25	0.36	14.3913	39.9759
Doff	19	Plantar	0.12	0.26	0.38	14.1684	37.2854			D2D8	4	Plantar	0.1	0.18	0.28	15.6907	56.0383
PD3	2	Plantar	0.08	0.21	0.29	12.3184	42.4772			D2D8	4	Plantar	0.1	0.17	0.27	14.713	54.4925
PD3	2	Plantar	0.07	0.3	0.37	14.5754	39.393			D2D8	4	Plantar	0.06	0.18	0.24	9.42887	39.287
PD3	2	Plantar	0.09	0.22	0.31	13.9292	44.9329			D2D8	4	Plantar	0.15	0.23	0.38	16.7631	44.1135
PD3	2	Plantar	0.08	0.26	0.34	13.7488	40.4378			D2D8	4	Plantar	0.11	0.26	0.37	12.4443	33.6333
PD3	2	Plantar	0.09	0.2	0.29	16.5386	57.0298			D2D8	4	Plantar	0.11	0.19	0.3	13.3324	44.4413
PD3	2	Plantar	0.08	0.13	0.21	20.9748	99.8798			D2D8	4	Plantar	0.1	0.22	0.32	15.6725	48.9766
PD3	2	Plantar	0.08	0.16	0.24	15.9757	66.5654			D2D8	4	Plantar	0.09	0.17	0.26	13.5912	52.2739
PD3	2	Plantar	0.08	0.17	0.25	15.7601	63.0404			D2D8	4	Plantar	0.11	0.16	0.27	17.0278	63.0658
PD3	2	Plantar	0.08	0.23	0.31	15.2317	49.1344			D2D8	4	Plantar	0.09	0.13	0.22	14.5166	65.9848
PD3	2	Plantar	0.09	0.17	0.26	17.5525	67.5097			D2D8	4	Plantar	0.12	0.19	0.31	12.1439	39.1737
PD3	2	Plantar	0.08	0.15	0.23	18.771	81.613			D2D8	4	Plantar	0.1	0.1	0.2	7.56119	37.8059
PD3	2	Plantar	0.09	0.15	0.24	18.6213	77.5886			D2D8	4	Plantar	0.11	0.28	0.39	14.0881	36.1234
PD3	3	Plantar	0.08	0.13	0.21	18.4809	88.0044			D2D8	9	Plantar	0.1	0.13	0.23	18.0863	78.6363
PD3	3	Plantar	0.08	0.12	0.2	18.8482	94.2409			D2D8	9	Plantar	0.1	0.12	0.22	21.3138	96.8807
PD3	3	Plantar	0.06	0.11	0.17	15.8577	93.2805			D2D8	9	Plantar	0.08	0.12	0.2	16.2973	81.4867
PD3	3	Plantar	0.09	0.12	0.21	17.7389	84.4709			D2D8	9	Plantar	0.11	0.12	0.23	15.789	68.6477
PD3	3	Plantar	0.1	0.16	0.26	16.9646	65.2486			D2D8	9	Plantar	0.08	0.15	0.23	14.6297	63.6076
PD3	3	Plantar	0.11	0.19	0.3	16.4007	54.6692			D2D8	9	Plantar	0.07	0.14	0.21	15.3714	73.1971
PD3	3	Plantar	0.09	0.14	0.23	18.9328	82.3164			D2D8	9	Plantar	0.07	0.13	0.2	11.8063	59.0313
PD3	3	Plantar	0.11	0.15	0.26	19.0665	73.3329			D2D8	9	Plantar	0.12	0.16	0.28	20.2082	72.1721
PD3	3	Plantar	0.1	0.16	0.26	17.7605	68.3096			D2D8	9	Plantar	0.09	0.17	0.26	18.4633	71.0128
PD3	3	Plantar	0.1	0.2	0.3	17.2147	66.2103			D2D8	9	Plantar	0.09	0.15	0.24	16.3608	68.1701
PD3	4	Plantar	0.1	0.27	0.37	13.7161	37.0705			D2D8	9	Plantar	0.09	0.12	0.21	16.546	78.7907
PD3	4	Plantar	0.06	0.2	0.26	9.19592	35.3689			D2D8	9	Plantar	0.05	0.13	0.18	12.408	68.9336
PD3	4	Plantar	0.13	0.28	0.41	11.6836	28.4967			D2D8	9	Plantar	0.1	0.14	0.24	19.898	82.9083
PD3	4	Plantar	0.11	0.49	0.6	13.8373	23.0622			D2D8	9	Plantar	0.09	0.12	0.21	19.2608	91.7182
PD3	9	Plantar	0.07	0.14	0.21	15.9713	76.0539			D2D8	12	Plantar	0.12	0.15	0.27	15.5066	57.4319
PD3	9	Plantar	0.1	0.13	0.23	19.7501	85.8698			D2D8	12	Plantar	0.11	0.19	0.3	13.4635	44.8783
PD3	9	Plantar	0.06	0.15	0.21	15.1205	72.0022			D2D8	12	Plantar	0.1	0.15	0.25	15.8535	63.414
PD3	9	Plantar	0.09	0.16	0.25	16.8985	67.5941			D2D8	12	Plantar	0.09	0.16	0.25	16.706	66.824
PD3	9	Plantar	0.09	0.22	0.31	15.7087	54.168			D2D8	12	Plantar	0.07	0.19	0.26	12.8892	49.5738
PD3	9	Plantar	0.11	0.2	0.31	16.0927	48.7658			D2D8	12	Plantar	0.07	0.16	0.23	13.1145	57.0198
PD3	9	Plantar	0.09	0.12	0.21	18.4126	87.6791			D2D8	12	Plantar	0.09	0.18	0.27	15.3211	56.7447
PD3	9	Plantar	0.11	0.13	0.24	18.4062	76.6925			D2D8	12	Plantar	0.09	0.16	0.25	15.548	62.1919
PD3	9	Plantar	0.09	0.16	0.25	18.5956	74.3824			D2D8	12	Plantar	0.11	0.17	0.28	18.4136	65.7628
PD3	9	Plantar	0.09	0.14	0.23	20.6079	89.5997			D2D8	15	Plantar	0.11	0.25	0.36	17.7334	49.2593
PD3	9	Plantar	0.08	0.19	0.27	15.7953	58.5013			D2D8	15	Plantar	0.13	0.2	0.33	18.5776	56.2956
PD3	9	Plantar	0.1	0.14	0.24	19.3511	80.6297			D2D8	15	Plantar	0.11	0.3	0.41	12.9338	31.5459
PD3	12	Plantar	0.11	0.09	0.2	12.4814	62.4068			D2D8	15	Plantar	0.15	0.24	0.39	18.95	48.5897
PD3	12	Plantar	0.09	0.26	0.35	13.7043	39.1551			D2D8	15	Plantar	0.13	0.22	0.35	13.9427	39.8363
PD3	12	Plantar	0.09	0.2	0.29	15.2481	52.5797			D2D8	15	Plantar	0.11	0.24	0.35	17.4969	49.991
PD3	12	Plantar	0.08	0.18	0.26	14.7595	56.7675			D2D8	15	Plantar	0.13	0.24	0.37	16.9948	45.932
PD3	12	Plantar	0.09	0.2	0.29	14.7536	50.8746			D2D8	15	Plantar	0.12	0.27	0.39	15.3187	39.2786
PD3	12	Plantar	0.07	0.17	0.24	12.1793	50.7472			D2D8	15	Plantar	0.12	0.26	0.38	16.8426	44.3226
PD3	12	Plantar	0.08	0.16	0.24	14.4422	60.1758			D2D8	15	Plantar	0.12	0.19	0.31	16.2495	52.4179
PD3	12	Plantar	0.1	0.19	0.29	15.6931	54.1143			D2D8	15	Plantar	0.11	0.22	0.33	15.9768	48.4145
PD3	12	Plantar	0.08	0.23	0.31	14.4255	46.5338			D2D8	15	Plantar	0.12	0.24	0.36	16.5399	45.9443
PD3	12	Plantar	0.09	0.17	0.26	16.6685	64.1096			D2D8	16	Plantar	0.08	0.21	0.29	14.6753	50.6045
PD3	12	Plantar	0.06	0.19	0.25	9.13584	36.5434			D2D8	16	Plantar	0.11	0.16	0.27	19.2587	71.3284
PD3	15	Plantar	0.12	0.42	0.54	15.2743	28.2858			D2D8	16	Plantar	0.1	0.18	0.28	16.3708	58.4673
PD3	15	Plantar	0.12	0.29	0.41	15.9159	38.8194			D2D8	16	Plantar	0.1	0.18	0.28	17.3182	61.8507
PD3	15	Plantar	0.13	0.27	0.4	17.5411	43.8527			D2D8	16	Plantar	0.15	0.26	0.41	17.9015	43.6623
PD3	15	Plantar	0.1	0.19	0.29	17.4647	60.2231			D2D8	16	Plantar	0.1	0.2	0.3	15.8014	52.6714
PD3	15	Plantar	0.1	0.18	0.28	17.5251	62.5895			D2D8	16	Plantar	0.12	0.12	0.24	20.629	85.954
PD3	15	Plantar	0.12	0.23	0.35	18.3227	52.3506			D2D8	16	Plantar	0.09	0.12	0.21	19.4547	92.6415
PD3	15	Plantar	0.14	0.21	0.35	15.7941	45.1259			D2D8	16	Plantar	0.11	0.18	0.29	18.4558	63.6408
PD3	15	Plantar	0.1	0.22	0.32	17.2105	53.7829			D2D8	16	Plantar	0.13	0.16	0.29	19.4429	67.0445
PD3	15	Plantar	0.11	0.21	0.32	18.5772	58.0537			D2D8	16	Plantar	0.1	0.17	0.27	17.4741	64.7188
PD3	15	Plantar	0.11	0.18	0.29	18.0806	62.3467			D2D8	16	Plantar	0.12	0.15	0.27	20.0603	74.2975
PD3	15	Plantar	0.1	0.16	0.26	18.6378	71.6837			D2D8	19	Plantar	0.11	0.15	0.26	17.8324	68.586
PD3	15	Plantar	0.09	0.19	0.28	15.7863	56.3797			D2D8	19	Plantar	0.09	0.17	0.26	15.0001	57.6928
PD3	15	Plantar	0.1	0.23	0.33	17.285	52.3788			D2D8	19	Plantar	0.12	0.23	0.35	12.4079	35.451
PD3	15	Plantar	0.11	0.25	0.36	15.6626	43.5071			D2D8	19	Plantar	0.13	0.21	0.34	13.7271	40.3739
PD3	16	Plantar	0.09	0.18	0.27	15.1035	55.9388			D2D8	19	Plantar	0.09	0.17	0.26	17.262	66.3922
PD3	16	Plantar	0.12	0.17	0.29	17.543	60.4929			D2D8	19	Plantar	0.11	0.12	0.23	20.9267	90.9857
PD3	16	Plantar	0.09	0.26	0.35	12.3683	35.3379			D2D8	19	Plantar	0.08	0.16	0.24	11.9136	49.6398
PD3	16	Plantar	0.1	0.27	0.37	13.5006	36.4882			D2D8	19	Plantar	0.05	0.14	0.19	13.6255	71.713
PD3	16	Plantar	0.1	0.26	0.36	11.3253	31.4592			D2D8	19	Plantar	0.06	0.12	0.18	11.3485	63.0473
PD3	16	Plantar	0.11	0.21	0.32	16.4088	51.2775			D2D8	19	Plantar	0.11	0.15	0.26	17.5313	67.4279
PD3	16	Plantar	0.14	0.19	0.33	15.7301	47.6669			D2D8	19	Plantar	0.1	0.13	0.23	16.546	71.9393
PD3	16	Plantar	0.11	0.25	0.36	14.1493	39.3035			D2D8	19	Plantar	0.08	0.11	0.19	17.3195	91.1553
PD3	16	Plantar	0.1	0.17	0.27	16.1284	59.7346			D2D8	19	Plantar	0.07	0.11	0.18	15.7797	87.6651
PD3	16	Plantar	0.09	0.26	0.35	13.6223	38.9209			D3D5	2	Plantar	0.05	0.19	0.24	11.2053	46.6889
PD3	16	Plantar	0.13	0.27	0.4	14.9305	37.3264			D3D5	2	Plantar	0.08	0.15	0.23	18.5776	80.7722
PD3	16	Plantar	0.11	0.23	0.34	16.7646	49.3077			D3D5	2	Plantar	0.09	0.13	0.22	19.4641	88.4732
PD3	16	Plantar	0.11	0.17	0.28	17.2987	61.7809			D3D5	2	Plantar	0.09	0.13	0.22	17.3139	78.6995
PD3	16	Plantar	0.09	0.18	0.27	16.4795	61.0352			D3D5	2	Plantar	0.08	0.11	0.19	17.3216	91.1665
PD3	19	Plantar	0.09	0.15	0.24	11.7966	49.1525			D3D5	2	Plantar	0.07	0.13	0.2	16.9301	84.6504
PD3	19	Plantar	0.09	0.28	0.37	10.4385	28.2122			D3D5	2	Plantar	0.08	0.12	0.2	19.5254	97.6272
PD3	19	Plantar	0.11	0.23	0.34	16.2907	47.9137			D3D5	2	Plantar	0.08	0.14	0.22	16.8505	76.5933
PD2	2	Dorsal	0.07	0.22	0.29	13.9054	47.9498			D3D5	2	Plantar	0.07	0.11	0.18	17.34	96.3333
PD2	2	Dorsal	0.11	0.22	0.33	16.5223	50.0677			D3D5	2	Plantar	0.1	0.17	0.27	18.6118	68.9326
PD2	2	Dorsal	0.09	0.14	0.23	10.8248	47.0642			D3D5	2	Plantar	0.1	0.13	0.23	20.0027	86.9683
PD2	2	Dorsal	0.05	0.17	0.22	14.326	65.1183			D3D5	3	Plantar	0.09	0.12	0.21	20.1174	95.7971
PD2	2	Dorsal	0.11	0.21	0.32	11.3633	35.5102			D3D5	3	Plantar	0.08	0.11	0.19	19.8796	104.629
PD2	3	Dorsal	0.07	0.13	0.2	6.24631	31.2315			D3D5	3	Plantar	0.05	0.16	0.21	10.6738	50.8277
PD2	3	Dorsal	0.09	0.14	0.23	15.4944	67.367			D3D5	3	Plantar	0.05	0.14	0.19	9.38858	49.4136
PD2	3	Dorsal	0.09	0.15	0.24	16.8035	70.0145			D3D5	3	Plantar	0.08	0.14	0.22	15.8656	72.1166
PD2	4	Dorsal	0.15	0.35	0.5	14.4654	28.9308			D3D5	3	Plantar	0.08	0.13	0.21	17.1294	81.5687
PD2	4	Dorsal	0.15	0.33	0.48	10.345	21.5521			D3D5	3	Plantar	0.09	0.13	0.22	18.0087	81.8579
PD2	4	Dorsal	0.15	0.26	0.41	10.3488	25.241			D3D5	3	Plantar	0.08	0.13	0.21	15.7231	74.8721
PD2	4	Dorsal	0.18	0.36	0.54	11.1936	20.729			D3D5	3	Plantar	0.09	0.14	0.23	18.477	80.3349
PD2	4	Dorsal	0.11	0.38	0.49	8.92738	18.2191			D3D5	3	Plantar	0.09	0.17	0.26	16.4586	63.3023
PD2	4	Dorsal	0.13	0.32	0.45	12.3383	27.4184			D3D5	3	Plantar	0.09	0.14	0.23	16.7077	72.6422
PD2	4	Dorsal	0.17	0.43	0.6	12.459	20.7651			D3D5	3	Plantar	0.09	0.15	0.24	17.1567	71.4862
PD2	4	Dorsal	0.1	0.33	0.43	8.56229	19.9123			D3D5	3	Plantar	0.1	0.13	0.23	18.499	80.4306
PD2	4	Dorsal	0.13	0.29	0.42	11.7496	27.9752			D3D5	4	Plantar	0.06	0.2	0.26	13.6271	52.4121
PD2	4	Dorsal	0.09	0.25	0.34	4.98566	14.6637			D3D5	4	Plantar	0.07	0.2	0.27	14.4427	53.4915
PD2	4	Dorsal	0.11	0.28	0.39	6.34247	16.2627			D3D5	4	Plantar	0.07	0.18	0.25	12.1365	48.5458
PD2	4	Dorsal	0.11	0.2	0.31	10.8095	34.8694			D3D5	4	Plantar	0.08	0.19	0.27	16.8972	62.5824
PD2	4	Dorsal	0.13	0.24	0.37	17.3663	46.9359			D3D5	4	Plantar	0.08	0.16	0.24	16.7876	69.9485
PD2	4	Dorsal	0.13	0.17	0.3	12.9769	43.2562			D3D5	9	Plantar	0.07	0.12	0.19	18.2596	96.1031
PD2	9	Dorsal	0.07	0.14	0.21	16.486	78.5049			D3D5	9	Plantar	0.08	0.14	0.22	19.995	90.8865
PD2	9	Dorsal	0.12	0.12	0.24	15.4337	64.3073			D3D5	9	Plantar	0.08	0.12	0.2	17.4278	82.9895
PD2	9	Dorsal	0.09	0.18	0.27	16.3413	60.5235			D3D5	9	Plantar	0.13	0.15	0.28	17.9468	64.0957
PD2	9	Dorsal	0.13	0.17	0.3	15.0529	50.1764			D3D5	9	Plantar	0.08	0.13	0.21	17.9722	85.5818
PD2	9	Dorsal	0.07	0.19	0.26	14.4541	55.5928			D3D5	9	Plantar	0.09	0.13	0.22	19.5726	88.9664
PD2	9	Dorsal	0.11	0.23	0.34	15.4209	45.3556			D3D5	9	Plantar	0.08	0.2	0.28	15.2369	54.4175
PD2	9	Dorsal	0.05	0.17	0.22	6.9337	31.5168			D3D5	9	Plantar	0.11	0.16	0.27	18.2539	67.6072
PD2	9	Dorsal	0.07	0.14	0.21	11.4713	54.6255			D3D5	9	Plantar	0.08	0.15	0.23	15.9399	69.3039
PD2	9	Dorsal	0.04	0.02	0.06	5.90061	42.4649			D3D5	9	Plantar	0.07	0.18	0.25	16.4499	65.7995
PD2	12	Dorsal	0.08	0.15	0.23	11.8769	51.6385			D3D5	9	Plantar	0.09	0.15	0.24	17.3546	72.3109
PD2	12	Dorsal	0.15	0.12	0.27	15.0122	55.6007			D3D5	12	Plantar	0.1	0.23	0.33	14.3168	43.3841
PD2	12	Dorsal	0.1	0.17	0.27	15.3164	56.7275			D3D5	12	Plantar	0.08	0.19	0.27	15.3687	56.9211
PD2	12	Dorsal	0.1	0.23	0.33	13.472	40.8242			D3D5	12	Plantar	0.09	0.19	0.28	16.2464	58.023
PD2	12	Dorsal	0.12	0.16	0.28	13.433	47.9751			D3D5	12	Plantar	0.09	0.18	0.27	15.9221	58.9708
PD2	12	Dorsal	0.07	0.17	0.24	9.36006	39.0003			D3D5	12	Plantar	0.07	0.16	0.23	15.7141	68.3223
PD2	12	Dorsal	0.1	0.1	0.2	15.2863	76.4314			D3D5	12	Plantar	0.08	0.14	0.22	17.6184	80.0836
PD2	12	Dorsal	0.09	0.13	0.22	13.561	61.6408			D3D5	12	Plantar	0.09	0.13	0.22	19.3816	88.0983
PD2	12	Dorsal	0.04	0.08	0.12	7.07686	58.9738			D3D5	12	Plantar	0.09	0.15	0.24	16.756	69.8167
PD2	15	Dorsal	0.03	0.18	0.21	7.64621	36.4105			D3D5	12	Plantar	0.07	0.11	0.18	16.5795	92.1086
PD2	15	Dorsal	0.07	0.03	0.1	6.71872	67.1872			D3D5	12	Plantar	0.07	0.11	0.18	14.8	82.2225
PD2	15	Dorsal	0.14	0.16	0.3	9.87337	32.9112			D3D5	15	Plantar	0.09	0.26	0.35	13.7747	39.3564
PD2	15	Dorsal	0.04	0.18	0.22	8.04088	36.5494			D3D5	15	Plantar	0.09	0.28	0.37	14.9961	40.5301
PD2	15	Dorsal	0.04	0.02	0.06	6.3907	106.512			D3D5	15	Plantar	0.14	0.3	0.44	13.9757	31.763
PD2	15	Dorsal	0.09	0.16	0.25	12.4829	49.9314			D3D5	15	Plantar	0.1	0.19	0.29	15.4749	53.3616
PD2	15	Dorsal	0.09	0.18	0.27	12.0733	44.7157			D3D5	15	Plantar	0.09	0.18	0.27	17.3728	64.3436
PD2	15	Dorsal	0.09	0.28	0.37	11.2933	30.5225			D3D5	15	Plantar	0.11	0.19	0.3	17.4307	58.1023
PD2	16	Dorsal	0.12	0.24	0.36	16.7196	46.4433			D3D5	15	Plantar	0.1	0.19	0.29	9.72972	33.5508
PD2	16	Dorsal	0.09	0.14	0.23	7.81701	33.987			D3D5	15	Plantar	0.07	0.18	0.25	10.8728	43.4913
PD2	19	Dorsal	0.03	0.12	0.15	9.23033	61.5356			D3D5	15	Plantar	0.08	0.22	0.3	14.426	48.0868
PD2	19	Dorsal	0.05	0.02	0.07	6.86305	98.0436			D3D5	15	Plantar	0.11	0.18	0.29	16.0393	55.3078
PD2	19	Dorsal	0.03	0.16	0.19	7.88624	41.5065			D3D5	15	Plantar	0.11	0.2	0.31	17.173	55.3968
PD2	19	Dorsal	0.03	0.14	0.17	7.85591	46.2112			D3D5	15	Plantar	0.11	0.17	0.28	17.7193	63.2833
PD2	19	Dorsal	0.07	0.03	0.1	10.4864	104.864			D3D5	15	Plantar	0.11	0.15	0.26	18.8175	72.3752
PD2	19	Dorsal	0.09	0.15	0.24	13.4026	55.8443			D3D5	15	Plantar	0.11	0.15	0.26	18.3868	70.7185
PD2	19	Dorsal	0.03	0.11	0.14	5.87543	41.9674			D3D5	16	Plantar	0.08	0.18	0.26	15.6434	60.1668
PD2	19	Dorsal	0.08	0.03	0.11	9.10905	82.8095			D3D5	16	Plantar	0.08	0.18	0.26	15.7627	60.6258
PD2	19	Dorsal	0.09	0.04	0.13	8.38705	64.5158			D3D5	16	Plantar	0.08	0.15	0.23	17.264	75.0607
PD2	19	Dorsal	0.12	0.15	0.27	12.8234	47.494			D3D5	16	Plantar	0.08	0.13	0.21	18.933	90.157
PD2	19	Dorsal	0.09	0.15	0.24	12.6189	52.5788			D3D5	16	Plantar	0.09	0.13	0.22	19.5326	88.7847
PD2	19	Dorsal	0.16	0.21	0.37	20.7915	56.1933			D3D5	16	Plantar	0.09	0.13	0.22	19.2724	87.6019
PD2	19	Dorsal	0.11	0.2	0.31	18.7855	60.5985			D3D5	16	Plantar	0.08	0.14	0.22	17.1368	77.8947
Doff	2	Dorsal	0.1	0.03	0.13	3.14188	58.0341			D3D5	16	Plantar	0.07	0.12	0.19	17.132	90.1683
Doff	2	Dorsal	0.09	0.12	0.21	17.8684	85.0875			D3D5	16	Plantar	0.1	0.15	0.25	19.1571	76.6284
Doff	2	Dorsal	0.01	0.04	0.05	5.03831	93.6654			D3D5	16	Plantar	0.07	0.1	0.17	16.9475	99.6913
Doff	2	Dorsal	0.08	0.18	0.26	14.6619	56.3919			D3D5	16	Plantar	0.11	0.15	0.26	18.7521	72.1235
Doff	2	Dorsal	0.1	0.03	0.13	2.35959	39.3265			D3D5	19	Plantar	0.08	0.25	0.33	13.0406	39.5168
Doff	3	Dorsal	0.04	0.09	0.13	6.38392	49.1071			D3D5	19	Plantar	0.14	0.21	0.35	14.1413	40.4037
Doff	3	Dorsal	0.1	0.09	0.19	8.78638	74.1562			D3D5	19	Plantar	0.13	0.2	0.33	15.4599	46.8482
Doff	3	Dorsal	0.04	0.09	0.13	10.5627	67.5876			D3D5	19	Plantar	0.07	0.13	0.2	15.9372	79.6862
Doff	3	Dorsal	0.09	0.14	0.23	4.40131	19.1361			D3D5	19	Plantar	0.07	0.36	0.43	10.9504	25.4661
Doff	4	Dorsal	0.11	0.23	0.34	13.5471	39.8445			D3D5	19	Plantar	0.07	0.22	0.29	12.2763	42.332
Doff	4	Dorsal	0.11	0.21	0.32	10.9032	34.0724			D3D5	19	Plantar	0.07	0.2	0.27	13.572	50.2666
Doff	4	Dorsal	0.14	0.19	0.33	16.4379	49.8117			D3D5	19	Plantar	0.08	0.19	0.27	12.4866	46.2465
Doff	4	Dorsal	0.03	0.03	0.06	2.29617	38.2695			D3D8	2	Plantar	0.1	0.18	0.28	18.2366	65.1306
Doff	4	Dorsal	0.09	0.26	0.35	10.966	31.3313			D3D8	2	Plantar	0.07	0.16	0.23	17.1961	74.7655
Doff	4	Dorsal	0.11	0.2	0.31	9.89344	26.0354			D3D8	2	Plantar	0.09	0.18	0.27	16.96	62.8148
Doff	9	Dorsal	0.03	0.3	0.33	4.64664	14.0807			D3D8	2	Plantar	0.08	0.16	0.24	18.7805	78.2522
Doff	9	Dorsal	0.06	0.05	0.11	7.42491	67.4992			D3D8	2	Plantar	0.09	0.15	0.24	17.5037	76.1029
Doff	9	Dorsal	0.15	0.2	0.35	19.5142	55.7547			D3D8	2	Plantar	0.09	0.13	0.22	19.4337	88.3352
Doff	9	Dorsal	0.14	0.17	0.31	15.294	49.3353			D3D8	2	Plantar	0.06	0.12	0.18	17.1554	95.3076
Doff	12	Dorsal	0.07	0.24	0.31	13.7306	44.2923			D3D8	2	Plantar	0.07	0.13	0.2	19.2235	96.1177
Doff	12	Dorsal	0.09	0.1	0.19	6.93053	36.4765			D3D8	2	Plantar	0.07	0.12	0.19	17.7485	93.4131
Doff	12	Dorsal	0.05	0.15	0.2	7.4637	37.3185			D3D8	2	Plantar	0.08	0.13	0.21	17.6426	84.0125
Doff	12	Dorsal	0.06	0.18	0.24	11.1718	46.549			D3D8	2	Plantar	0.07	0.1	0.17	20.9234	123.079
Doff	12	Dorsal	0.03	0.02	0.05	5.03337	100.667			D3D8	3	Plantar	0.09	0.15	0.24	17.0479	71.0328
Doff	12	Dorsal	0.08	0.18	0.26	12.4541	47.9005			D3D8	3	Plantar	0.08	0.13	0.21	17.5911	83.7672
Doff	15	Dorsal	0.1	0.18	0.28	16.883	60.2965			D3D8	3	Plantar	0.06	0.11	0.17	15.7505	92.6501
Doff	15	Dorsal	0.12	0.18	0.3	15.7751	54.3969			D3D8	3	Plantar	0.07	0.12	0.19	15.6467	82.351
Doff	15	Dorsal	0.12	0.29	0.41	13.432	32.761			D3D8	3	Plantar	0.09	0.12	0.21	18.0895	86.1403
Doff	15	Dorsal	0.09	0.19	0.28	7.39185	26.3995			D3D8	3	Plantar	0.08	0.11	0.19	16.2987	85.7827
Doff	15	Dorsal	0.15	0.35	0.5	13.0825	26.1651			D3D8	3	Plantar	0.1	0.13	0.23	18.3511	79.7875
Doff	19	Dorsal	0.09	0.18	0.27	13.737	50.8778			D3D8	3	Plantar	0.09	0.14	0.23	16.297	70.8567
Doff	19	Dorsal	0.1	0.27	0.37	15.4063	41.6388			D3D8	3	Plantar	0.08	0.12	0.2	18.8835	94.4175
Doff	19	Dorsal	0.08	0.17	0.25	9.34396	37.3758			D3D8	3	Plantar	0.08	0.11	0.19	18.2646	96.1294
Doff	19	Dorsal	0.07	0.16	0.23	11.1304	70.3097			D3D8	4	Plantar	0.08	0.17	0.25	15.7983	63.1932
Doff	19	Dorsal	0.05	0.02	0.07	4.52373	113.093			D3D8	4	Plantar	0.09	0.18	0.27	16.3293	60.4789
Doff	19	Dorsal	0.11	0.27	0.38	13.9253	36.6455			D3D8	4	Plantar	0.09	0.24	0.33	14.0701	42.6367
Doff	19	Dorsal	0.13	0.31	0.44	13.8619	31.5043			D3D8	4	Plantar	0.1	0.25	0.35	14.1986	40.5673
Doff	19	Dorsal	0.07	0.23	0.3	13.8146	46.0487			D3D8	4	Plantar	0.08	0.16	0.24	11.9984	49.9932
Doff	19	Dorsal	0.05	0.24	0.29	11.9407	41.1749			D3D8	4	Plantar	0.08	0.17	0.25	15.1757	60.703
Doff	19	Dorsal	0.04	0.02	0.06	2.61017	43.5029			D3D8	4	Plantar	0.08	0.23	0.31	13.6458	44.0186
PD3	2	Dorsal	0.08	0.09	0.17	16.005	94.1471			D3D8	4	Plantar	0.09	0.2	0.29	16.1694	55.7567
PD3	3	Dorsal	0.02	0.14	0.16	5.62473	35.1546			D3D8	4	Plantar	0.11	0.21	0.32	16.3131	50.9784
PD3	3	Dorsal	0.04	0.02	0.06	5.06249	84.3749			D3D8	4	Plantar	0.13	0.19	0.32	15.5923	48.7259
PD3	4	Dorsal	0.08	0.28	0.36	9.9009	27.5025			D3D8	9	Plantar	0.09	0.11	0.2	19.7915	98.9576
PD3	4	Dorsal	0.06	0.13	0.19	4.74797	24.9893			D3D8	9	Plantar	0.1	0.1	0.2	23.7302	118.651
PD3	4	Dorsal	0.1	0.21	0.31	10.204	32.9161			D3D8	9	Plantar	0.07	0.12	0.19	17.6959	93.1365
PD3	4	Dorsal	0.07	0.15	0.22	12.2625	55.7386			D3D8	9	Plantar	0.07	0.11	0.18	18.5476	103.042
PD3	4	Dorsal	0.11	0.14	0.25	14.8094	59.2377			D3D8	9	Plantar	0.09	0.09	0.18	22.3446	124.137
PD3	4	Dorsal	0.06	0.1	0.16	11.0013	68.7582			D3D8	9	Plantar	0.08	0.14	0.22	18.1082	82.31
PD3	4	Dorsal	0.11	0.31	0.42	10.868	25.8762			D3D8	9	Plantar	0.08	0.13	0.21	17.3855	82.7879
PD3	4	Dorsal	0.05	0.2	0.25	6.98358	27.9343			D3D8	9	Plantar	0.06	0.13	0.19	17.8429	93.9099
PD3	4	Dorsal	0.09	0.28	0.37	12.6974	34.3172			D3D8	9	Plantar	0.11	0.13	0.24	21.8596	91.0815
PD3	4	Dorsal	0.06	0.28	0.34	9.0406	26.59			D3D8	9	Plantar	0.06	0.1	0.16	16.4698	102.936
PD3	12	Dorsal	0.07	0.15	0.22	15.4322	70.1462			D3D8	9	Plantar	0.09	0.13	0.22	20.5213	93.2785
PD3	12	Dorsal	0.06	0.06	0.12	7.07297	58.9414			D3D8	12	Plantar	0.08	0.22	0.3	13.2739	44.2463
PD3	19	Dorsal	0.08	0.19	0.27	11.8892	44.0341			D3D8	12	Plantar	0.08	0.21	0.29	15.3748	53.0167
PD3	19	Dorsal	0.07	0.27	0.34	13.9341	40.9828			D3D8	12	Plantar	0.1	0.2	0.3	18.3977	61.3256
PD3	19	Dorsal	0.09	0.26	0.35	13.5617	38.7476			D3D8	12	Plantar	0.09	0.16	0.25	13.8669	55.4676
PD3	19	Dorsal	0.13	0.21	0.34	16.6606	49.0016			D3D8	12	Plantar	0.07	0.12	0.19	15.3239	80.6518
PD3	19	Dorsal	0.08	0.15	0.23	10.2772	44.6835			D3D8	12	Plantar	0.09	0.08	0.17	10.56	62.1179
PD3	19	Dorsal	0.07	0.23	0.3	13.0362	43.454			D3D8	12	Plantar	0.07	0.13	0.2	15.8845	79.4223
PD3	19	Dorsal	0.09	0.27	0.36	14.1372	39.2701			D3D8	12	Plantar	0.06	0.2	0.26	12.0941	46.5158
PD3	19	Dorsal	0.13	0.21	0.34	14.7369	43.3439			D3D8	12	Plantar	0.07	0.21	0.28	13.0982	56.9489
PD3	19	Dorsal	0.08	0.15	0.23	12.5995	54.7803			D3D8	15	Plantar	0.11	0.12	0.23	17.003	73.926
PD3	19	Dorsal	0.06	0.07	0.13	6.36678	48.9753			D3D8	15	Plantar	0.11	0.15	0.26	19.4683	74.8783
PD3	19	Dorsal	0.09	0.2	0.29	15.3346	52.8781			D3D8	15	Plantar	0.1	0.2	0.3	13.9052	46.3507
PD3	19	Dorsal	0.09	0.32	0.41	12.6942	30.9614			D3D8	15	Plantar	0.08	0.18	0.26	15.2386	58.6098
										D3D8	15	Plantar	0.11	0.19	0.3	18.2916	60.972
										D3D8	15	Plantar	0.12	0.31	0.43	13.6577	31.762
										D3D8	15	Plantar	0.12	0.24	0.36	17.2045	47.7903
										D3D8	15	Plantar	0.12	0.22	0.34	15.6706	46.0901
										D3D8	15	Plantar	0.06	0.14	0.2	13.8233	69.1163
										D3D8	15	Plantar	0.09	0.15	0.24	15.8747	66.1446
										D3D8	15	Plantar	0.12	0.23	0.35	16.706	47.7314
										D3D8	15	Plantar	0.1	0.21	0.31	17.5013	56.4558
										D3D8	15	Plantar	0.12	0.22	0.34	17.2634	50.7748
										D3D8	16	Plantar	0.12	0.17	0.29	16.9993	58.6184
										D3D8	16	Plantar	0.09	0.19	0.28	14.7898	52.8207
										D3D8	16	Plantar	0.1	0.15	0.25	17.637	70.5481
										D3D8	16	Plantar	0.11	0.15	0.26	19.7474	75.9516
										D3D8	16	Plantar	0.1	0.16	0.26	17.1729	66.0496
										D3D8	16	Plantar	0.12	0.15	0.27	19.9307	73.8173
										D3D8	16	Plantar	0.08	0.15	0.23	15.8096	68.7373
										D3D8	16	Plantar	0.12	0.15	0.27	18.9082	70.0305
										D3D8	16	Plantar	0.07	0.09	0.16	17.267	107.919
										D3D8	16	Plantar	0.08	0.1	0.18	17.5698	97.6099
										D3D8	16	Plantar	0.1	0.1	0.2	21.5155	107.578
										D3D8	16	Plantar	0.09	0.1	0.19	20.5516	108.166
										D3D8	19	Plantar	0.11	0.15	0.26	14.7988	56.9184
										D3D8	19	Plantar	0.09	0.18	0.27	16.4904	61.0755
										D3D8	19	Plantar	0.08	0.14	0.22	16.6583	75.7194
										D3D8	19	Plantar	0.08	0.14	0.22	16.7184	75.9926
										D3D8	19	Plantar	0.1	0.14	0.24	14.7943	61.6427
										D3D8	19	Plantar	0.06	0.15	0.21	10.0813	48.006
										D3D8	19	Plantar	0.13	0.24	0.37	14.0723	38.0333
										D3D8	19	Plantar	0.13	0.17	0.3	15.5079	51.6929
										D3D13	2	Plantar	0.07	0.19	0.26	13.5035	51.9366
										D3D13	2	Plantar	0.08	0.2	0.28	13.5418	48.3635
										D3D13	2	Plantar	0.08	0.25	0.33	13.335	40.4091
										D3D13	2	Plantar	0.09	0.11	0.2	21.6631	108.315
										D3D13	2	Plantar	0.08	0.12	0.2	20.2275	101.138
										D3D13	2	Plantar	0.08	0.15	0.23	18.3482	79.7747
										D3D13	2	Plantar	0.07	0.15	0.22	16.4747	74.885
										D3D13	2	Plantar	0.06	0.19	0.25	11.609	46.4359
										D3D13	2	Plantar	0.08	0.16	0.24	16.3047	67.9363
										D3D13	2	Plantar	0.06	0.15	0.21	14.9849	71.3567
										D3D13	2	Plantar	0.04	0.22	0.26	7.34652	28.2559
										D3D13	2	Plantar	0.07	0.19	0.26	15.4618	59.4684
										D3D13	2	Plantar	0.08	0.18	0.26	16.8485	64.8021
										D3D13	3	Plantar	0.1	0.14	0.24	18.7163	77.9848
										D3D13	3	Plantar	0.11	0.13	0.24	19.3859	80.7747
										D3D13	3	Plantar	0.1	0.13	0.23	18.307	79.5958
										D3D13	3	Plantar	0.09	0.11	0.2	17.378	86.8902
										D3D13	3	Plantar	0.1	0.13	0.23	19.1595	83.3022
										D3D13	3	Plantar	0.09	0.12	0.21	19.8111	94.3387
										D3D13	3	Plantar	0.1	0.13	0.23	19.1484	83.2537
										D3D13	3	Plantar	0.09	0.14	0.23	19.0577	82.8594
										D3D13	3	Plantar	0.1	0.12	0.22	19.8224	90.1017
										D3D13	3	Plantar	0.09	0.17	0.26	15.9099	61.1919
										D3D13	3	Plantar	0.07	0.12	0.19	18.3368	96.5094
										D3D13	4	Plantar	0.08	0.25	0.33	12.8551	38.9548
										D3D13	4	Plantar	0.11	0.23	0.34	14.4015	42.3573
										D3D13	4	Plantar	0.08	0.16	0.24	15.9399	63.7597
										D3D13	4	Plantar	0.13	0.33	0.46	11.5816	25.1775
										D3D13	4	Plantar	0.11	0.3	0.41	13.9161	33.9417
										D3D13	4	Plantar	0.13	0.23	0.36	15.0882	41.9117
										D3D13	4	Plantar	0.15	0.16	0.31	12.6698	40.8703
										D3D13	4	Plantar	0.12	0.25	0.37	14.1169	38.1539
										D3D13	4	Plantar	0.12	0.23	0.35	13.991	39.9742
										D3D13	4	Plantar	0.13	0.21	0.34	15.5933	45.8628
										D3D13	9	Plantar	0.06	0.13	0.19	17.3498	91.315
										D3D13	9	Plantar	0.08	0.12	0.2	20.5535	102.768
										D3D13	9	Plantar	0.06	0.14	0.2	14.982	74.9099
										D3D13	9	Plantar	0.07	0.15	0.22	15.2453	69.297
										D3D13	9	Plantar	0.07	0.16	0.23	17.8378	77.5558
										D3D13	9	Plantar	0.07	0.13	0.2	17.892	89.4602
										D3D13	9	Plantar	0.1	0.09	0.19	22.2812	117.27
										D3D13	9	Plantar	0.1	0.15	0.25	18.7279	74.9116
										D3D13	9	Plantar	0.08	0.11	0.19	17.5536	92.3872
										D3D13	9	Plantar	0.1	0.13	0.23	18.0278	78.3816
										D3D13	9	Plantar	0.09	0.14	0.23	17.1617	74.616
										D3D13	12	Plantar	0.1	0.22	0.32	17.2554	53.9231
										D3D13	12	Plantar	0.1	0.28	0.38	13.9037	36.5887
										D3D13	12	Plantar	0.07	0.44	0.51	12.8302	25.1572
										D3D13	12	Plantar	0.09	0.31	0.4	11.6481	29.1203
										D3D13	12	Plantar	0.09	0.33	0.42	9.93467	23.654
										D3D13	12	Plantar	0.09	0.25	0.34	15.2955	44.9869
										D3D13	12	Plantar	0.1	0.26	0.36	14.5955	40.5431
										D3D13	12	Plantar	0.09	0.16	0.25	18.0109	72.0435
										D3D13	15	Plantar	0.1	0.2	0.3	16.3353	54.451
										D3D13	15	Plantar	0.11	0.24	0.35	16.5416	47.2616
										D3D13	15	Plantar	0.1	0.19	0.29	17.1137	59.0128
										D3D13	15	Plantar	0.12	0.19	0.31	15.6971	50.6358
										D3D13	15	Plantar	0.11	0.17	0.28	18.2075	65.0267
										D3D13	15	Plantar	0.13	0.16	0.29	16.445	56.7068
										D3D13	15	Plantar	0.11	0.21	0.32	18.1109	56.5966
										D3D13	15	Plantar	0.14	0.18	0.32	18.544	57.9499
										D3D13	15	Plantar	0.09	0.2	0.29	15.0959	52.0547
										D3D13	15	Plantar	0.1	0.21	0.31	17.5992	56.7716
										D3D13	15	Plantar	0.13	0.2	0.33	16.5813	50.2462
										D3D13	15	Plantar	0.11	0.2	0.31	16.2283	52.3492
										D3D13	15	Plantar	0.1	0.2	0.3	17.1622	57.2075
										D3D13	16	Plantar	0.12	0.22	0.34	18.3033	53.8331
										D3D13	16	Plantar	0.14	0.19	0.33	21.0239	63.7086
										D3D13	16	Plantar	0.09	0.18	0.27	16.9469	62.7663
										D3D13	16	Plantar	0.14	0.18	0.32	18.4038	57.5118
										D3D13	16	Plantar	0.1	0.16	0.26	17.5306	67.4252
										D3D13	16	Plantar	0.1	0.15	0.25	16.8219	67.2878
										D3D13	16	Plantar	0.09	0.15	0.24	16.4534	68.5557
										D3D13	16	Plantar	0.09	0.16	0.25	16.577	66.3078
										D3D13	16	Plantar	0.09	0.14	0.23	18.0432	78.4488
										D3D13	16	Plantar	0.11	0.15	0.26	17.2686	66.4178
										D3D13	16	Plantar	0.1	0.14	0.24	18.8247	78.4364
										D3D13	16	Plantar	0.11	0.14	0.25	17.7496	70.9986
										D3D13	19	Plantar	0.06	0.18	0.24	13.2304	55.1265
										D3D13	19	Plantar	0.1	0.19	0.29	13.1109	45.2099
										D3D13	19	Plantar	0.1	0.16	0.26	15.5898	59.9609
										D3D13	19	Plantar	0.14	0.24	0.38	15.1049	39.7497
										D3D13	19	Plantar	0.06	0.12	0.18	15.1098	83.9434
										D3D13	19	Plantar	0.08	0.12	0.2	18.1632	90.8161
										D3D13	19	Plantar	0.11	0.14	0.25	18.6059	74.4236
										D3D13	19	Plantar	0.08	0.13	0.21	17.8554	85.0259
										D3D13	19	Plantar	0.05	0.1	0.15	12.1672	81.1146
										D3D13	19	Plantar	0.09	0.1	0.19	17.2177	90.6195
										D3D13	19	Plantar	0.07	0.12	0.19	16.9681	89.3056
										D2D5	2	Dorsal	0.11	0.16	0.27	15.8907	58.8543
										D2D5	2	Dorsal	0.07	0.15	0.22	11.7748	53.522
										D2D5	2	Dorsal	0.09	0.1	0.19	10.23	53.8421
										D2D5	4	Dorsal	0.14	0.22	0.36	14.824	41.1779
										D2D5	4	Dorsal	0.2	0.23	0.43	9.52952	22.1617
										D2D5	4	Dorsal	0.12	0.17	0.29	15.8622	54.6974
										D2D5	4	Dorsal	0.12	0.12	0.24	8.76924	36.5385
										D2D5	9	Dorsal	0.08	0.2	0.28	14.0645	50.2305
										D2D5	9	Dorsal	0.06	0.15	0.21	10.6063	50.5062
										D2D5	9	Dorsal	0.08	0.12	0.2	9.32276	46.6138
										D2D5	9	Dorsal	0.08	0.14	0.22	17.4065	72.5272
										D2D5	12	Dorsal	0.07	0.17	0.24	11.1927	46.6364
										D2D5	15	Dorsal	0.15	0.23	0.38	14.5913	38.3981
										D2D5	15	Dorsal	0.08	0.18	0.26	9.19196	35.3537
										D2D8	12	Dorsal	0.08	0.15	0.23	16.1866	70.3766
										D2D8	12	Dorsal	0.06	0.15	0.21	11.4017	54.2937
										D2D8	12	Dorsal	0.18	0.21	0.39	16.8999	43.3331
										D2D8	12	Dorsal	0.08	0.08	0.16	7.37995	46.1247
										D2D8	15	Dorsal	0.14	0.21	0.35	15.6717	44.7763
										D2D8	19	Dorsal	0.09	0.19	0.28	16.4363	58.7012
										D2D8	19	Dorsal	0.08	0.09	0.17	9.67999	56.9411
										D3D5	2	Dorsal	0.1	0.26	0.36	14.2924	39.7011
										D3D5	2	Dorsal	0.08	0.11	0.19	9.28735	48.8808
										D3D5	3	Dorsal	0.07	0.09	0.16	8.4785	52.9907
										D3D5	4	Dorsal	0.05	0.12	0.17	5.7362	33.7424
										D3D5	4	Dorsal	0.1	0.16	0.26	12.2354	47.0592
										D3D5	4	Dorsal	0.12	0.1	0.22	15.5611	70.7322
										D3D5	4	Dorsal	0.08	0.14	0.22	17.2761	78.5276
										D3D5	4	Dorsal	0.06	0.14	0.2	7.77098	38.8549
										D3D5	4	Dorsal	0.1	0.18	0.28	15.7166	56.1308
										D3D5	4	Dorsal	0.08	0.13	0.21	16.0228	76.2989
										D3D5	4	Dorsal	0.09	0.1	0.19	16.385	86.2369
										D3D5	9	Dorsal	0.08	0.11	0.19	19.4654	97.3271
										D3D5	9	Dorsal	0.08	0.11	0.19	13.9738	73.5464
										D3D5	9	Dorsal	0.07	0.11	0.18	13.6035	75.5748
										D3D5	12	Dorsal	0.09	0.15	0.24	18.7179	77.9913
										D3D5	12	Dorsal	0.01	0.12	0.13	4.67759	35.9815
										D3D5	12	Dorsal	0.02	0.07	0.09	9.50503	43.1973
										D3D5	15	Dorsal	0.13	0.18	0.31	18.5907	59.9701
										D3D5	19	Dorsal	0.07	0.3	0.37	11.5011	31.0842
										D3D5	19	Dorsal	0.04	0.09	0.13	10.0064	28.818
										D3D5	19	Dorsal	0.08	0.16	0.24	13.8234	41.6931
										D3D5	19	Dorsal	0.08	0.09	0.17	14.7656	86.8562
										D3D5	19	Dorsal	0.09	0.15	0.24	6.92783	28.866
										D3D5	19	Dorsal	0.07	0.15	0.22	16.3982	74.5372
										D3D5	19	Dorsal	0.12	0.12	0.24	13.6806	57.0024
										D3D8	3	Dorsal	0.09	0.16	0.25	17.1562	68.6248
										D3D8	3	Dorsal	0.09	0.15	0.24	17.1552	71.48
										D3D8	4	Dorsal	0.09	0.23	0.32	8.93802	27.9313
										D3D8	4	Dorsal	0.11	0.08	0.19	6.18574	32.5566
										D3D8	4	Dorsal	0.09	0.21	0.3	12.2694	40.8981
										D3D8	4	Dorsal	0.1	0.21	0.31	13.5213	43.6172
										D3D8	4	Dorsal	0.08	0.19	0.27	10.9166	40.4317
										D3D8	12	Dorsal	0.07	0.14	0.21	17.0962	81.4103
										D3D8	12	Dorsal	0.09	0.09	0.18	10.2476	56.9313
										D3D8	12	Dorsal	0.07	0.12	0.19	13.0006	68.424
										D3D8	12	Dorsal	0.05	0.06	0.11	8.55104	77.7367
										D3D8	19	Dorsal	0.11	0.2	0.31	16.1297	52.0312
										D3D8	19	Dorsal	0.04	0.12	0.16	8.23565	51.4728
										D3D8	19	Dorsal	0.09	0.2	0.29	14.577	50.2653
										D3D8	19	Dorsal	0.06	0.11	0.17	15.6657	92.1513
										D3D8	19	Dorsal	0.09	0.11	0.2	18.2663	91.3316
										D3D13	2	Dorsal	0.05	0.12	0.17	11.0739	65.1405
										D3D13	2	Dorsal	0.07	0.11	0.18	8.78515	48.8064
										D3D13	4	Dorsal	0.1	0.27	0.37	14.8516	40.1394
										D3D13	4	Dorsal	0.1	0.13	0.23	14.8614	57.1593
										D3D13	4	Dorsal	0.09	0.18	0.27	14.9231	55.2706
										D3D13	4	Dorsal	0.1	0.12	0.22	12.5072	56.8511
										D3D13	4	Dorsal	0.1	0.17	0.27	18.3766	68.0614
										D3D13	12	Dorsal	0.1	0.19	0.29	13.4124	46.2497
										D3D13	12	Dorsal	0.08	0.1	0.18	9.76686	54.2603
										D3D13	12	Dorsal	0.08	0.17	0.25	17.1262	68.5047
										D3D13	12	Dorsal	0.07	0.11	0.18	14.156	78.6446
										D3D13	12	Dorsal	0.07	0.13	0.2	14.9283	74.6414
										D3D13	12	Dorsal	0.06	0.09	0.15	11.701	78.0065
										D3D13	15	Dorsal	0.12	0.2	0.32	16.9119	52.8496
										D3D13	19	Dorsal	0.06	0.12	0.18	16.003	88.9055
										D3D13	19	Dorsal	0.05	0.08	0.13	8.81355	67.7965
										D3D13	19	Dorsal	0.08	0.13	0.21	17.4741	83.2099
										D3D13	19	Dorsal	0.02	0.05	0.07	2.93572	41.9388

## Sheet: Averages
Animal ID	Control Avg Swing Time	Dox Avg Swing Time	Control Avg Stance Time	Dox Avg Stance Time	Control Avg Duty Cycle	Dox Avg Duty Cycle	Control Avg Speed	Dox Avg Speed
2	0.0853846	0.09	0.168205	0.16	0.648968	0.65	63.08	68.46
3	0.0926829	0.09	0.155854	0.15	0.617389	0.61	63.97	73.37
4	0.110682	0.1	0.260227	0.2	0.689278	0.65	33.42	47.36
9	0.0895122	0.08	0.172439	0.14	0.645463	0.62	57.97	77.19
12	0.0833333	0.0852239	0.169762	0.181045	0.657572	0.670379	52.06	55.96
15	0.1045	0.115441	0.21525	0.221324	0.657384	0.653647	49.01	48.85
16	0.102195	0.096875	0.197561	0.175417	0.652686	0.633194	55.52	67.09
19	0.082619	0.0895775	0.175476	0.161549	0.642094	0.638338	51.58	60.16
Average	0.0938636	0.0933897	0.189347	0.173667	0.651354	0.640695	53.3262	62.305
StDev	0.0106566	0.0108601	0.0342117	0.0268575	0.0199813	0.0194729	9.66838	11.0455
