# Supplementary material for: Silencing long-descending inter-enlargement propriospinal neurons improves hindlimb stepping after contusive spinal cord injuries
Source: eLife journal article supplement (doi:10.7554/elife.82944), 2023-12-15
Supplement: supp [file elife_poa_e82944_Figure_9_source_data_1.xlsx]

## Sheet: Post-Inj Control
Time point	Animal ID	Plantar/Dorsal	Hindlimb Phase	Heterolateral Phase	Homolateral Phase	Forelimb Phase			Time point	Animal ID	Plantar/Dorsal	Hindlimb Phase	Heterolateral Phase	Homolateral Phase	Forelimb Phase			Time point	Animal ID	Plantar/Dorsal	Hindlimb Phase	Heterolateral Phase	Homolateral Phase	Forelimb Phase
PD2	2	Plantar	0.541667	0.166667	0.541667	0.608696			Doff	2	Plantar	0.533333	0.266667	0.8	0.518519			PD3	2	Plantar	0.551724	0.141379	0.793103	0.551724
PD2	2	Plantar	0.551724	0.310345	0.758621	0.541667			Doff	2	Plantar	0.56	0.36	0.84	0.516129			PD3	2	Plantar	0.594595	0.135135	0.540541	0.625385
PD2	2	Plantar	0.6	0.1	0.6	0.566667			Doff	2	Plantar	0.5	0.357143	0.857143	0.52			PD3	2	Plantar	0.516129	0.16129	0.709677	0.548387
PD2	2	Plantar	0.535714	0.0357143	0.607143	0.558824			Doff	2	Plantar	0.5	0.0909091	0.590909	0.518519			PD3	2	Plantar	0.676471	0.264706	0.705882	0.551724
PD2	2	Plantar	0.606061	0.181818	0.606061	0.533333			Doff	2	Plantar	0.52381	0.142857	0.666667	0.521739			PD3	2	Plantar	0.586207	0.310345	0.862069	0.5
PD2	2	Plantar	0.529412	0.117647	0.5	0.548387			Doff	2	Plantar	0.52	0.32	0.76	0.521739			PD3	2	Plantar	0.764706	0.136364	0.571429	0.5
PD2	2	Plantar	0.565217	0.0869565	0.521739	0.59375			Doff	2	Plantar	0.521739	0.0434783	0.652174	0.55			PD3	2	Plantar	0.541667	0.333333	0.791667	0.5
PD2	2	Plantar	0.894737	0.315789	0.818182	0.571429			Doff	2	Plantar	0.5	0.142857	0.607143	0.535714			PD3	2	Plantar	0.56	0.24	0.68	0.5
PD2	3	Plantar	0.7	0.466667	0.866667	0.555556			Doff	3	Plantar	0.714286	0.178571	0.758621	0.55			PD3	2	Plantar	0.612903	0.322581	0.83871	0.576923
PD2	3	Plantar	0.551724	0.37931	0.724138	0.653846			Doff	3	Plantar	0.551724	0.172414	0.766667	0.52			PD3	2	Plantar	0.538462	0.346154	0.846154	0.518519
PD2	3	Plantar	0.5	0.131579	0.684211	0.56			Doff	3	Plantar	0.538462	0.230769	0.692308	0.521739			PD3	2	Plantar	0.521739	0.217391	0.695652	0.52
PD2	3	Plantar	0.558824	0.205882	0.617647	0.5			Doff	3	Plantar	0.535714	0.142857	0.571429	0.538462			PD3	2	Plantar	0.5	0.166667	0.666667	0.521739
PD2	3	Plantar	0.515152	0.0909091	0.515152	0.558824			Doff	3	Plantar	0.541667	0.291667	0.791667	0.518519			PD3	3	Plantar	0.571429	0.380952	1	0.52
PD2	3	Plantar	0.5	0.181818	0.590909	0.555556			Doff	3	Plantar	0.533333	0.333333	0.8	0.53125			PD3	3	Plantar	0.5	0.45	1	0.529412
PD2	3	Plantar	0.636364	0.5	1	0.6			Doff	3	Plantar	0.567568	0.135135	0.540541	0.6			PD3	3	Plantar	0.647059	0.117647	0.529412	0.5
PD2	3	Plantar	0.590909	0.5	1	0.583333			Doff	3	Plantar	0.535714	0.178571	0.714286	0.586207			PD3	3	Plantar	0.571429	0.142857	0.52381	0.5
PD2	3	Plantar	0.625	0.416667	1	0.525			Doff	3	Plantar	0.583333	0.0416667	0.625	0.5			PD3	3	Plantar	0.5	0	0.576923	0.633333
PD2	3	Plantar	0.538462	0.153846	0.538462	0.533333			Doff	3	Plantar	0.540541	0.054054	0.52	0.5			PD3	3	Plantar	0.566667	0.0769231	0.633333	0.611111
PD2	3	Plantar	0.538462	0.0384615	0.538462	0.517241			Doff	3	Plantar	0.56	0.103448	0.586207	0.521739			PD3	3	Plantar	0.521739	0.0434783	0.521739	0.578947
PD2	4	Plantar	0.5	0.275	0.741935	0.625			Doff	4	Plantar	0.526316	0.236842	0.684211	0.518519			PD3	3	Plantar	0.5	0.0384615	0.576923	0.541667
PD2	9	Plantar	0.571429	0.285714	0.685714	0.56			Doff	4	Plantar	0.515152	0.393939	0.939394	0.5			PD3	3	Plantar	0.576923	0.384615	0.846154	0.551724
PD2	9	Plantar	0.521739	0.130435	0.608696	0.590909			Doff	4	Plantar	0.53125	0.263158	0.657895	0.576923			PD3	3	Plantar	0.538462	0.461538	0.961538	0.565217
PD2	9	Plantar	0.545455	0.0454546	0.545455	0.56			Doff	4	Plantar	0.552632	0.275862	0.827586	0.545455			PD3	4	Plantar	0.540541	0.108108	0.648649	0.545455
PD2	9	Plantar	0.5	0.166667	0.533333	0.5			Doff	4	Plantar	0.773585	0.0377359	0.603774	0.535714			PD3	4	Plantar	0.576923	0.0243902	0.653846	0.571429
PD2	9	Plantar	0.592593	0.111111	0.666667	0.52381			Doff	4	Plantar	0.743243	0.132075	0.675676	0.5			PD3	4	Plantar	0.682927	0.0731707	0.536585	0.541667
PD2	12	Plantar	0.541667	0	0.541667	0.652174			Doff	4	Plantar	0.5	0.310811	0.865385	0.625			PD3	4	Plantar	0.6	0.0833333	0.583333	0.611111
PD2	12	Plantar	0.761905	0.0434783	0.666667	0.541667			Doff	4	Plantar	0.5	0.4375	0.90625	0.6			PD3	9	Plantar	0.52381	0	0.52381	0.55814
PD2	12	Plantar	0.782609	0.380952	0.956522	0.555556			Doff	4	Plantar	0.571429	0.428571	1	0.5			PD3	9	Plantar	0.565217	0.0434783	0.565217	0.52381
PD2	12	Plantar	0.608696	0.185185	0.740741	0.53125			Doff	9	Plantar	0.518519	0.259259	0.740741	0.53125			PD3	9	Plantar	0.666667	0.180476	0.809524	0.571429
PD2	12	Plantar	0.952381	0.037037	0.611111	0.636364			Doff	9	Plantar	0.538462	0.269231	0.769231	0.62069			PD3	9	Plantar	0.56	0.08	0.68	0.52
PD2	12	Plantar	0.571429	0.107143	0.607143	0.512821			Doff	9	Plantar	0.538462	0.151515	0.615385	0.645161			PD3	9	Plantar	0.517241	0.141379	0.758621	0.541667
PD2	15	Plantar	0.5	0.277778	0.75	0.590909			Doff	9	Plantar	0.545455	0	0.545455	0.645161			PD3	9	Plantar	0.515152	0.242424	0.727273	0.525
PD2	15	Plantar	0.513514	0.297297	0.756757	0.585366			Doff	9	Plantar	0.64	0	0.76	0.53125			PD3	9	Plantar	0.52381	0.333333	0.904762	0.5
PD2	15	Plantar	0.5	0.25	0.75	0.537037			Doff	9	Plantar	0.555556	0.185185	0.62963	0.516129			PD3	9	Plantar	0.541667	0.333333	0.833333	0.529412
PD2	15	Plantar	0.516129	0.0967742	0.548387	0.520833			Doff	9	Plantar	0.535714	0.178571	0.678571	0.555556			PD3	9	Plantar	0.56	0.04	0.56	0.594595
PD2	15	Plantar	0.575758	0.363636	0.909091	0.555556			Doff	9	Plantar	0.785714	0.205882	0.617647	0.52			PD3	9	Plantar	0.565217	0	0.521739	0.512195
PD2	15	Plantar	0.517241	0.172414	0.655172	0.530612			Doff	9	Plantar	0.516129	0.0967742	0.548387	0.513514			PD3	9	Plantar	0.592593	0.037037	0.518519	0.677419
PD2	15	Plantar	0.533333	0.233333	0.7	0.54			Doff	9	Plantar	0.568182	0.477273	0.818182	0.568182			PD3	9	Plantar	0.541667	0.0416667	0.5	0.567568
PD2	16	Plantar	0.517241	0.03125	0.517241	0.571429			Doff	9	Plantar	0.894737	0.258065	0.526316	0.534483			PD3	12	Plantar	0.55	0.114286	0.55	0.517241
PD2	16	Plantar	0.53125	0.09375	0.59375	0.5			Doff	12	Plantar	0.666667	0.119048	0.595238	0.535714			PD3	12	Plantar	0.542857	0.04	0.514286	0.5
PD2	16	Plantar	0.5	0.125	0.625	0.555556			Doff	12	Plantar	0.571429	0.0344828	0.655172	0.555556			PD3	12	Plantar	0.586207	0.275862	0.793103	0.521739
PD2	16	Plantar	0.5	0	0.53125	0.535714			Doff	12	Plantar	0.52381	0.166667	0.6	0.555556			PD3	12	Plantar	0.576923	0.169231	0.884615	0.518519
PD2	16	Plantar	0.515152	0	0.515152	0.52			Doff	12	Plantar	0.542857	0.228571	0.628571	0.538462			PD3	12	Plantar	0.586207	0.275862	0.827586	0.555556
PD2	16	Plantar	0.518519	0.407407	0.962963	0.52			Doff	12	Plantar	0.592593	0.037037	0.777778	0.518519			PD3	12	Plantar	0.583333	0.375	0.916667	0.517241
PD2	16	Plantar	0.538462	0.307692	0.769231	0.517241			Doff	12	Plantar	0.606061	0.212121	0.76	0.518519			PD3	12	Plantar	0.583333	0.166667	0.833333	0.5
PD2	16	Plantar	0.551724	0.344828	0.793103	0.576923			Doff	12	Plantar	0.52	0.2	0.774194	0.53125			PD3	12	Plantar	0.517241	0.206897	0.724138	0.545455
PD2	16	Plantar	0.517241	0.413793	0.862069	0.541667			Doff	12	Plantar	0.625	0.16	1	0.535714			PD3	12	Plantar	0.632903	0	0.580645	0.545455
PD2	16	Plantar	0.516129	0.354839	1	0.62069			Doff	15	Plantar	0.525	0.425	0.9	0.558824			PD3	12	Plantar	0.576923	0.3	0.538462	0.518519
PD2	16	Plantar	0.5	0.1875	0.741935	0.571429			Doff	15	Plantar	0.522727	0.454545	0.931818	0.555556			PD3	12	Plantar	0.76	0.340426	0.518519	0.5
PD2	16	Plantar	0.541667	0.037037	0.541667	0.575758			Doff	15	Plantar	0.512821	0.435897	0.974359	0.5			PD3	15	Plantar	0.592593	0.166667	0.592593	0.571429
PD2	16	Plantar	0.555556	0.103448	0.555556	0.535714			Doff	15	Plantar	0.517241	0.103448	0.62069	0.5625			PD3	15	Plantar	0.512195	0.219512	0.756098	0.541667
PD2	2	Dorsal	0.551724	0.275862	0.724138	0.586207			Doff	15	Plantar	0.518519	0.148148	0.62963	0.534884			PD3	15	Plantar	0.5	0.2	0.7	0.515152
PD2	2	Dorsal	0.545455	0.0434783	0.575758	0.6			Doff	15	Plantar	0.6	0.36	0.8	0.585366			PD3	15	Plantar	0.517241	0.103448	0.586207	0.515152
PD2	2	Dorsal	0.565217	0	0.565217	0.571429			Doff	15	Plantar	0.518519	0.259259	0.740741	0.529412			PD3	15	Plantar	0.535714	0.142857	0.642857	0.527778
PD2	2	Dorsal	0.863636	0.363636	0.78125	0.666667			Doff	15	Plantar	0.588235	0.0294118	0.588235	0.518519			PD3	15	Plantar	0.514286	0.114286	0.542857	0.533333
PD2	2	Dorsal	0.59375	0.1875	0.72	0.517241			Doff	16	Plantar	0.555556	0.148148	0.592593	0.580645			PD3	15	Plantar	0.542857	0.0571429	0.514286	0.517241
PD2	3	Dorsal	0.55	0	0.8	0.515152			Doff	16	Plantar	0.545455	0.0909091	0.575758	0.521739			PD3	15	Plantar	0.5	0.15625	0.6875	0.575758
PD2	3	Dorsal	0.521739	0.0434783	0.565217	0.566667			Doff	16	Plantar	0.567568	0.135135	0.675676	0.56			PD3	15	Plantar	0.53125	0.09375	0.625	0.5625
PD2	3	Dorsal	0.541667	0.125	0.583333	0.527778			Doff	16	Plantar	0.5	0.166667	0.666667	0.525			PD3	15	Plantar	0.517241	0.137931	0.586207	0.512821
PD2	4	Dorsal	0.66	0.28	0.62	0.529412			Doff	16	Plantar	0.529412	0.117647	0.676471	0.566667			PD3	15	Plantar	0.576923	0.115385	0.615385	0.567568
PD2	4	Dorsal	0.6875	0.08	0.75	0.511111			Doff	16	Plantar	0.571429	0	0.619048	0.566667			PD3	15	Plantar	0.571429	0.285714	0.821429	0.5
PD2	4	Dorsal	0.609756	0.166667	0.731707	0.583333			Doff	16	Plantar	0.578947	0.0476191	0.578947	0.535714			PD3	15	Plantar	0.515152	0.242424	0.757576	0.55814
PD2	4	Dorsal	0.592593	0.243902	0.666667	0.514286			Doff	16	Plantar	0.535714	0.321429	0.785714	0.53125			PD3	15	Plantar	0.527778	0.194444	0.722222	0.625
PD2	4	Dorsal	0.612245	0.122449	0.653061	0.542857			Doff	16	Plantar	0.518519	0.185185	0.703704	0.516129			PD3	16	Plantar	0.518519	0.111111	0.592593	0.580645
PD2	4	Dorsal	0.733333	0.0222222	0.555556	0.515152			Doff	16	Plantar	0.538462	0.192308	0.653846	0.5			PD3	16	Plantar	0.517241	0.103448	0.586207	0.517241
PD2	4	Dorsal	0.8	0.0666667	0.633333	0.5			Doff	16	Plantar	0.52381	0.285714	0.666667	0.551724			PD3	16	Plantar	0.514286	0.128571	0.771429	0.592593
PD2	4	Dorsal	0.953488	0.15	0.674419	0.542857			Doff	16	Plantar	0.55	0.1	0.7	0.517241			PD3	16	Plantar	0.513514	0.216216	0.783784	0.571429
PD2	4	Dorsal	0.628571	0.119048	0.595238	0.515152			Doff	19	Plantar	0.535714	0.0357143	0.5	0.5			PD3	16	Plantar	0.527778	0.277778	0.861111	0.551724
PD2	4	Dorsal	0.617647	0.0238095	0.647059	0.583333			Doff	19	Plantar	0.777778	0.103448	0.833333	0.517241			PD3	16	Plantar	0.53125	0.125	0.6875	0.555556
PD2	4	Dorsal	0.564103	0.358974	0.948718	0.516129			Doff	19	Plantar	0.677419	0.16129	0.741935	0.5			PD3	16	Plantar	0.575758	0.242424	0.69697	0.516129
PD2	4	Dorsal	0.516129	0.193548	0.65	0.518519			Doff	19	Plantar	0.526316	0.157895	0.631579	0.5			PD3	16	Plantar	0.527778	0.111111	0.722222	0.514286
PD2	4	Dorsal	0.513514	0.189189	0.621622	0.516129			Doff	19	Plantar	0.518519	0.296296	0.851852	0.538462			PD3	16	Plantar	0.518519	0.222222	0.703704	0.5
PD2	4	Dorsal	0.6	0.3	0.8	0.538462			Doff	2	Dorsal	0.551724	0.310345	0.724138	0.526316			PD3	16	Plantar	0.571429	0.2	0.742857	0.583333
PD2	9	Dorsal	0.666667	0.238095	0.809524	0.52			Doff	2	Dorsal	0.571429	0	0.52381	0.545455			PD3	16	Plantar	0.525	0.05	0.55	0.515152
PD2	9	Dorsal	0.583333	0.166667	0.708333	0.555556			Doff	2	Dorsal	0.5625	0.166667	0.6875	0.535714			PD3	16	Plantar	0.5	0.075	0.529412	0.62963
PD2	9	Dorsal	0.518519	0.148148	0.592593	0.6			Doff	2	Dorsal	0.5	0.0384615	0.615385	0.5			PD3	16	Plantar	0.5	0.357143	0.821429	0.520833
PD2	9	Dorsal	0.666667	0.0333333	0.666667	0.5			Doff	3	Dorsal	0.571429	0.214286	0.678571	0.606061			PD3	16	Plantar	0.518519	0.37037	0.888889	0.536585
PD2	9	Dorsal	0.576923	0.153846	0.615385	0.517241			Doff	3	Dorsal	0.923077	0.461538	0.821429	0.629032			PD3	19	Plantar	0.583333	0.0588235	0.583333	0.512195
PD2	9	Dorsal	0.529412	0.205882	0.5	0.56			Doff	3	Dorsal	0.538462	0.192308	0.615385	0.545455			PD3	19	Plantar	0.594595	0	0.72973	0.517241
PD2	9	Dorsal	0.954545	0	0.681818	0.6			Doff	3	Dorsal	0.846154	0.384615	1	0.606061			PD3	19	Plantar	0.970588	0	0.558824	0.518519
PD2	9	Dorsal	0.954545	0.380952	0.526316	0.62963			Doff	4	Dorsal	0.73913	0.347826	0.594595	0.529412			PD3	2	Dorsal	0.882353	0.0952381	0.529412	0.586207
PD2	9	Dorsal	0.526316	0	0.64	0.5			Doff	4	Dorsal	0.588235	0.470588	0.939394	0.518519			PD3	3	Dorsal	0.5	0	0.545455	0.527778
PD2	12	Dorsal	0.521739	0.296296	0.652174	0.565217			Doff	4	Dorsal	0.6875	0.125	0.75	0.538462			PD3	3	Dorsal	0.75	0.347826	0.6875	0.5
PD2	12	Dorsal	0.62963	0.259259	0.814815	0.652174			Doff	4	Dorsal	0.545455	0.333333	0.69697	0.576923			PD3	4	Dorsal	0.722222	0.0833333	0.694444	0.5
PD2	12	Dorsal	0.555556	0.269231	0.740741	0.606061			Doff	4	Dorsal	0.771429	0.5	0.571429	0.535714			PD3	4	Dorsal	0.578947	0.157895	0.741935	0.535714
PD2	12	Dorsal	0.575758	0	0.575758	0.514286			Doff	4	Dorsal	0.514286	0.0285714	0.857143	0.535714			PD3	4	Dorsal	0.677419	0.129032	0.515152	0.518519
PD2	12	Dorsal	0.678571	0.0714286	0.571429	0.527778			Doff	9	Dorsal	0.5	0.365385	0.973684	0.5			PD3	4	Dorsal	0.818182	0.5	0.909091	0.53125
PD2	12	Dorsal	0.583333	0.0416667	0.75	0.526316			Doff	9	Dorsal	0.939394	0.363636	0.606061	0.512195			PD3	4	Dorsal	0.818182	0.4	0.88	0.515152
PD2	12	Dorsal	0.636364	0.0909091	0.55	0.515152			Doff	9	Dorsal	0.787879	0.1	0.588235	0.5			PD3	4	Dorsal	0.56	0.375	0.833333	0.513514
PD2	12	Dorsal	0.833333	0.25	0.772727	0.613636			Doff	9	Dorsal	0.571429	0.285714	0.6	0.517241			PD3	4	Dorsal	0.52381	0.0952381	0.595238	0.551724
PD2	12	Dorsal	0.975	0.4	0.9	0.538462			Doff	12	Dorsal	0.516129	0.0571429	0.709677	0.5			PD3	4	Dorsal	0.56	0.243243	0.6	0.517241
PD2	15	Dorsal	0.619048	0.0333333	0.714286	0.5625			Doff	12	Dorsal	0.612903	0.225806	0.612903	0.518519			PD3	4	Dorsal	0.513514	0.176471	0.72973	0.627778
PD2	15	Dorsal	0.6	0.423077	0.6	0.5			Doff	12	Dorsal	0.615789	0.368421	0.894737	0.517241			PD3	4	Dorsal	0.588235	0.4	0.823529	0.567568
PD2	15	Dorsal	0.623846	0.222222	0.722222	0.526316			Doff	12	Dorsal	0.75	0.4	0.757576	0.56			PD3	12	Dorsal	0.590909	0.272727	0.909091	0.627647
PD2	15	Dorsal	0.636364	0.5	0.5	0.580645			Doff	12	Dorsal	0.666667	0.208333	0.72	0.551724			PD3	12	Dorsal	0.833333	0.333333	0.52	0.529412
PD2	15	Dorsal	0.64	0.263158	0.6	0.515152			Doff	12	Dorsal	0.730769	0.0769231	0.666667	0.625			PD3	19	Dorsal	0.555556	0.185185	0.740741	0.517241
PD2	15	Dorsal	0.56	0	0.52	0.529412			Doff	15	Dorsal	0.5	0.307692	0.653846	0.516129			PD3	19	Dorsal	0.5	0.176471	0.705882	0.5
PD2	15	Dorsal	0.555556	0.222222	0.814815	0.533333			Doff	15	Dorsal	0.5	0.107143	0.607143	0.591837			PD3	19	Dorsal	0.514286	0.114286	0.657143	0.52
PD2	15	Dorsal	0.918919	0.351351	0.72973	0.5			Doff	15	Dorsal	0.62069	0.137931	0.655172	0.536585			PD3	19	Dorsal	0.5	0	0.529412	0.558824
PD2	16	Dorsal	0.5	0.277778	0.851852	0.516129			Doff	15	Dorsal	0.512195	0	0.609756	0.62626			PD3	19	Dorsal	0.608696	0.310345	0.565217	0.571429
PD2	16	Dorsal	0.521739	0.26087	0.694444	0.571429			Doff	15	Dorsal	0.607143	0.0243902	0.535714	0.538462			PD3	19	Dorsal	0.72973	0.0666667	0.666667	0.627647
PD2	19	Dorsal	0.866667	0.142857	0.6	0.526316			Doff	19	Dorsal	0.5	0.04	0.62	0.526316			PD3	19	Dorsal	0.733333	0.222222	0.638889	0.535714
PD2	19	Dorsal	1	0.285714	0.526316	0.515152			Doff	19	Dorsal	0.592593	0.178571	0.518519	0.5			PD3	19	Dorsal	0.529412	0.147059	0.558824	0.518519
PD2	19	Dorsal	0.884615	0.115385	0.692308	0.515152			Doff	19	Dorsal	0.567568	0.04	0.540541	0.542857			PD3	19	Dorsal	0.521739	0.173913	0.826087	0.555556
PD2	19	Dorsal	0.823529	0.0416667	0.705882	0.52381			Doff	19	Dorsal	0.52	0.222222	0.6	0.65			PD3	19	Dorsal	1	0.230769	0.586207	0.545455
PD2	19	Dorsal	0.583333	0.0434783	0.541667	0.538462			Doff	19	Dorsal	0.681818	0.0454546	0.636364	0.666667			PD3	19	Dorsal	0.586207	0.0344828	0.682927	0.513514
PD2	19	Dorsal	0.73913	0.0344828	0.608696	0.53125			Doff	19	Dorsal	0.809524	0.5	0.619048	0.55			PD3	19	Dorsal	0.512195	0.195122	0.756757	0.586207
PD2	19	Dorsal	0.642857	0.0909091	0.642857	0.571429			Doff	19	Dorsal	0.842105	0.131579	0.657895	0.541667
PD2	19	Dorsal	0.857143	0.0869565	0.521739	0.518519			Doff	19	Dorsal	0.789474	0.136364	0.636364	0.5
PD2	19	Dorsal	0.777778	0.148148	0.846154	0.518519			Doff	19	Dorsal	0.625	0.233333	0.7	0.629048
PD2	19	Dorsal	0.740741	0.0416667	0.555556	0.521739			Doff	19	Dorsal	0.793103	0.241379	0.793103	0.5
PD2	19	Dorsal	0.875	0.375	0.625	0.75
PD2	19	Dorsal	0.540541	0.135135	0.513514	0.666667
PD2	19	Dorsal	0.621622	0.108108	0.677419	0.5
	Average		0.621973	0.18255	0.673229	0.552708				Average		0.592584	0.202474	0.698824	0.543087				Average		0.581296	0.179842	0.684737	0.543296
	St. Deviation		0.13102	0.13406	0.12751	0.044259				St. Deviation		0.103911	0.132509	0.121383	0.0390395				St. Deviation		0.0975902	0.121398	0.129904	0.0379381
	Total Number Steps		114	114	114	114				Total Number Steps		111	111	111	111				Total Number Steps		107	107	107	107
	# of steps outside 2 S.D.		33	47	38	12				# of steps outside 2 S.D.		24	52	40	10				# of steps outside 2 S.D.		18	44	42	10

## Sheet: Post-Inj Dox
Time point	Animal ID	Plantar/Dorsal	Hindlimb Phase	Heterolateral Phase	Homolateral Phase	Forelimb Phase			Time point	Animal ID	Plantar/Dorsal	Hindlimb Phase	Heterolateral Phase	Homolateral Phase	Forelimb Phase			Time point	Animal ID	Plantar/Dorsal	Hindlimb Phase	Heterolateral Phase	Homolateral Phase	Forelimb Phase			Time point	Animal ID	Plantar/Dorsal	Hindlimb Phase	Heterolateral Phase	Homolateral Phase	Forelimb Phase			Time point	Animal ID	Plantar/Dorsal	Hindlimb Phase	Heterolateral Phase	Homolateral Phase	Forelimb Phase
D2D5	2	Plantar	0.622222	0.266667	0.733333	0.567568			D2D8	2	Plantar	0.6	0.12	0.64	0.518519			D3D5	2	Plantar	0.75	0.25	0.666667	0.533333			D3D8	2	Plantar	0.5	0.107143	0.571429	0.518519			D3D13	2	Plantar	0.538462	0.461538	0.923077	0.538462
D2D5	2	Plantar	0.517241	0.137931	0.724138	0.540541			D2D8	2	Plantar	0.555556	0.185185	0.666667	0.516129			D3D5	2	Plantar	0.565217	0.130435	0.608696	0.571429			D3D8	2	Plantar	0.521739	0.173913	0.608696	0.545455			D3D13	2	Plantar	0.5	0.321429	0.892857	0.516129
D2D5	2	Plantar	0.5	0.105263	0.631579	0.526316			D2D8	2	Plantar	0.7	0.366667	0.9	0.52			D3D5	2	Plantar	0.5	0.0909091	0.590909	0.533333			D3D8	2	Plantar	0.518519	0.148148	0.592593	0.538462			D3D13	2	Plantar	0.515152	0.242424	0.787879	0.529412
D2D5	2	Plantar	0.652174	0.0434783	0.521739	0.538462			D2D8	2	Plantar	0.695652	0.434783	0.966667	0.518519			D3D5	2	Plantar	0.5	0	0.590909	0.5			D3D8	2	Plantar	0.541667	0.0833333	0.625	0.5			D3D13	2	Plantar	0.55	0	0.55	0.55
D2D5	2	Plantar	0.545455	0.0454546	0.545455	0.6			D2D8	2	Plantar	0.564103	0.282051	0.869565	0.521739			D3D5	2	Plantar	0.526316	0	0.631579	0.52381			D3D8	2	Plantar	0.565217	0	0.565217	0.6			D3D13	2	Plantar	0.5	0	0.55	0.55
D2D5	2	Plantar	0.514286	0.342857	0.714286	0.52381			D2D8	2	Plantar	0.791667	0.291667	0.833333	0.521739			D3D5	2	Plantar	0.6	0.05	0.65	0.590909			D3D8	2	Plantar	0.5	0.0909091	0.590909	0.55			D3D13	2	Plantar	0.521739	0.0869565	0.608696	0.545455
D2D5	2	Plantar	0.515152	0.424242	0.848485	0.521739			D2D8	2	Plantar	0.517241	0.448276	0.793103	0.55			D3D5	2	Plantar	0.6	0	0.55	0.631579			D3D8	2	Plantar	0.5	0	0.611111	0.578947			D3D13	2	Plantar	0.590909	0.0454546	0.681818	0.56
D2D5	2	Plantar	0.535714	0.321429	0.714286	0.5			D2D8	2	Plantar	0.565217	0.434783	0.956522	0.535714			D3D5	2	Plantar	0.5	0.0909091	0.590909	0.521739			D3D8	2	Plantar	0.6	0.15	0.6	0.526316			D3D13	2	Plantar	0.72	0.130434	0.72	0.565217
D2D5	2	Plantar	0.5	0.458333	0.833333	0.628571			D2D8	2	Plantar	0.583333	0.25	0.75	0.55			D3D5	2	Plantar	0.555556	0.0555556	0.666667	0.52381			D3D8	2	Plantar	0.578947	0.105263	0.578947	0.5			D3D13	2	Plantar	0.541667	0.291667	0.791667	0.535714
D2D5	2	Plantar	0.548387	0.0645161	0.548387	0.548387			D2D8	2	Plantar	0.565217	0.130435	0.565217	0.52			D3D5	2	Plantar	0.518519	0.444444	0.925926	0.52381			D3D8	2	Plantar	0.52381	0.0952381	0.571429	0.555556			D3D13	2	Plantar	0.52381	0.190476	0.809524	0.5
D2D5	2	Plantar	0.526316	0.16129	0.631579	0.576923			D2D8	2	Plantar	0.517241	0.137931	0.62069	0.521739			D3D5	2	Plantar	0.521739	0.26087	0.888889	0.6			D3D8	2	Plantar	0.588235	0.0476191	0.529412	0.526316			D3D13	2	Plantar	0.653846	0.0769231	0.5	0.541667
D2D5	3	Plantar	0.53125	0.15625	0.625	0.590909			D2D8	2	Plantar	0.5	0.0344828	0.535714	0.538462			D3D5	3	Plantar	0.52381	0.0952381	0.52381	0.571429			D3D8	3	Plantar	0.541667	0.25	0.666667	0.565217			D3D13	2	Plantar	0.5	0.423077	1	0.627143
D2D5	3	Plantar	0.542857	0.0857143	0.6	0.589756			D2D8	2	Plantar	0.529412	0.0714286	0.588235	0.518519			D3D5	3	Plantar	0.526316	0.0526316	0.578947	0.55			D3D8	3	Plantar	0.571429	0.0476191	0.571429	0.5			D3D13	2	Plantar	0.576923	0.384615	0.846154	0.538462
D2D5	3	Plantar	0.545455	0.030303	0.515152	0.6			D2D8	2	Plantar	0.590909	0	0.545455	0.53125			D3D5	3	Plantar	0.736842	0.157895	0.52381	0.55			D3D8	3	Plantar	0.627059	0.117647	0.705882	0.5			D3D13	3	Plantar	0.541667	0.0833333	0.5	0.52381
D2D5	3	Plantar	0.5	0.25	0.75	0.5			D2D8	2	Plantar	0.5	0.176471	0.5	0.6			D3D5	3	Plantar	0.909091	0.363636	0.894737	0.611111			D3D8	3	Plantar	0.631579	0.263158	0.789474	0.5			D3D13	3	Plantar	0.5	0	0.541667	0.521739
D2D5	3	Plantar	0.538462	0.230769	0.5	0.666667			D2D8	3	Plantar	0.541667	0.0833333	0.541667	0.586207			D3D5	3	Plantar	0.590909	0.0454546	0.5	0.681818			D3D8	3	Plantar	0.571429	0.380952	0.809524	0.5			D3D13	3	Plantar	0.521739	0.26087	0.73913	0.545455
D2D5	3	Plantar	0.525	0.125	0.65	0.533333			D2D8	3	Plantar	0.647059	0.117647	0.588235	0.5			D3D5	3	Plantar	0.52381	0.0454546	0.52381	0.541667			D3D8	3	Plantar	0.684211	0.263158	0.684211	0.5			D3D13	3	Plantar	0.55	0.35	0.85	0.541667
D2D5	3	Plantar	0.513514	0.162162	0.756757	0.518519			D2D8	3	Plantar	0.555556	0.222222	0.592593	0.5			D3D5	3	Plantar	0.545455	0.0454546	0.590909	0.533333			D3D8	3	Plantar	0.565217	0.26087	0.782609	0.541667			D3D13	3	Plantar	0.521739	0	0.521739	0.5
D2D5	3	Plantar	0.515152	0.181818	0.727273	0.666667			D2D8	3	Plantar	0.538462	0.0384615	0.5	0.521739			D3D5	3	Plantar	0.619048	0.333333	0.714286	0.545455			D3D8	3	Plantar	0.608696	0.304348	0.782609	0.521739			D3D13	3	Plantar	0.619048	0.0434783	0.52381	0.526316
D2D5	3	Plantar	0.529412	0.176471	0.735294	0.567568			D2D8	3	Plantar	0.625	0	0.5	0.518519			D3D5	3	Plantar	0.521739	0.217391	0.565217	0.521739			D3D8	3	Plantar	0.6	0	0.6	0.571429			D3D13	3	Plantar	0.521739	0.217391	0.782609	0.545455
D2D5	3	Plantar	0.590909	0.272727	0.727273	0.5			D2D8	3	Plantar	0.538462	0.0384615	0.538462	0.5			D3D5	3	Plantar	0.538462	0.269231	0.769231	0.6			D3D8	3	Plantar	0.526316	0	0.631579	0.5			D3D13	3	Plantar	0.521739	0.0869565	0.521739	0.571429
D2D5	3	Plantar	0.608696	0.217391	0.73913	0.545455			D2D8	3	Plantar	0.56	0.2	0.68	0.576923			D3D5	3	Plantar	0.521739	0.347826	0.826087	0.578947			D3D8	4	Plantar	0.56	0.16	0.68	0.6			D3D13	3	Plantar	0.545455	0.0454546	0.5	0.590909
D2D5	3	Plantar	0.5	0.233333	0.733333	0.558824			D2D8	3	Plantar	0.5	0.142857	0.75	0.545455			D3D5	3	Plantar	0.541667	0.166667	0.541667	0.625			D3D8	4	Plantar	0.518519	0.111111	0.62963	0.611111			D3D13	3	Plantar	0.538462	0.0769231	0.576923	0.545455
D2D5	3	Plantar	0.518519	0.296296	0.814815	0.5			D2D8	3	Plantar	0.705882	0.411765	0.941176	0.535714			D3D5	3	Plantar	0.521739	0.0434783	0.521739	0.5			D3D8	4	Plantar	0.545455	0.242424	0.666667	0.551724			D3D13	3	Plantar	0.578947	0.0526316	0.578947	0.5
D2D5	3	Plantar	0.5	0.333333	0.866667	0.5			D2D8	3	Plantar	0.611111	0.5	1	0.5			D3D5	4	Plantar	0.5	0.192308	0.555556	0.55			D3D8	4	Plantar	0.514286	0.114286	0.542857	0.5			D3D13	4	Plantar	0.545455	0.242424	0.787879	0.52
D2D5	4	Plantar	0.5	0.447368	0.921053	0.517241			D2D8	3	Plantar	0.538462	0.0384615	0.615385	0.6			D3D5	4	Plantar	0.555556	0.0384615	0.538462	0.571429			D3D8	4	Plantar	0.625	0.5	0.916667	0.575758			D3D13	4	Plantar	0.529412	0.294118	0.705882	0.52381
D2D5	4	Plantar	0.515152	0.393939	0.727273	0.538462			D2D8	3	Plantar	0.5	0.0384615	0.615385	0.625			D3D5	4	Plantar	0.6	0.24	0.88	0.52381			D3D8	4	Plantar	0.56	0.4	0.84	0.517241			D3D13	4	Plantar	0.64	0.12	0.6	0.529412
D2D5	4	Plantar	0.6	0.171429	0.828571	0.571429			D2D8	4	Plantar	0.527778	0.138889	0.638889	0.5			D3D5	4	Plantar	0.555556	0.111111	0.62963	0.583333			D3D8	4	Plantar	0.580645	0.290323	0.758621	0.5			D3D13	4	Plantar	0.521739	0.217391	0.673913	0.5625
D2D5	4	Plantar	0.742857	0.114286	0.571429	0.525			D2D8	4	Plantar	0.607143	0.107143	0.607143	0.53125			D3D5	4	Plantar	0.583333	0.333333	0.583333	0.545455			D3D8	4	Plantar	0.551724	0.275862	0.735294	0.592593			D3D13	4	Plantar	0.512195	0.195122	0.682927	0.540541
D2D5	4	Plantar	0.516129	0.111111	0.709677	0.529412			D2D8	4	Plantar	0.666667	0.111111	0.592593	0.60069			D3D5	9	Plantar	0.578947	0.473684	0.947368	0.529412			D3D8	4	Plantar	0.5	0.0625	0.53125	0.541667			D3D13	4	Plantar	0.527778	0.0833333	0.583333	0.52
D2D5	4	Plantar	0.566667	0.466667	0.966667	0.576923			D2D8	4	Plantar	0.5	0.333333	0.791667	0.645161			D3D5	9	Plantar	0.5	0.454545	0.863636	0.5			D3D8	4	Plantar	0.5	0.03125	0.5625	0.545455			D3D13	4	Plantar	0.516129	0.129032	0.612903	0.64
D2D5	4	Plantar	0.555556	0.0857143	0.666667	0.529412			D2D8	4	Plantar	0.5	0.236842	0.631579	0.645161			D3D5	9	Plantar	0.52381	0.0476191	0.52381	0.517241			D3D8	9	Plantar	0.55	0	0.55	0.558824			D3D13	4	Plantar	0.513514	0.189189	0.72973	0.567568
D2D5	4	Plantar	0.628571	0	0.628571	0.666667			D2D8	4	Plantar	0.783784	0.0540541	0.567568	0.53125			D3D5	9	Plantar	1	0.107143	0.571429	0.515152			D3D8	9	Plantar	0.5	0.05	0.55	0.533333			D3D13	4	Plantar	0.514286	0.0571429	0.542857	0.534884
D2D5	4	Plantar	0.526316	0.0789474	0.526316	0.514286			D2D8	4	Plantar	0.533333	0.166667	0.666667	0.516129			D3D5	9	Plantar	0.52381	0.380952	0.904762	0.56			D3D8	9	Plantar	0.578947	0.210526	0.736842	0.517241			D3D13	4	Plantar	0.529412	0.0294118	0.558824	0.560976
D2D5	9	Plantar	0.807692	0.384615	0.761905	0.59375			D2D8	4	Plantar	0.5625	0.09375	0.5625	0.555556			D3D5	9	Plantar	0.545455	0.409091	0.909091	0.5			D3D8	9	Plantar	0.611111	0.111111	0.555556	0.517241			D3D13	9	Plantar	0.526316	0.0526316	0.578947	0.5
D2D5	9	Plantar	0.566667	0.0333333	0.533333	0.545455			D2D8	4	Plantar	0.576923	0.115385	0.615385	0.52			D3D5	9	Plantar	0.678571	0	0.535714	0.517241			D3D8	9	Plantar	0.555556	0.166667	0.5	0.533333			D3D13	9	Plantar	0.55	0.05	0.55	0.526316
D2D5	9	Plantar	0.52	0.36	0.84	0.551724			D2D8	4	Plantar	0.518519	0.148148	0.592593	0.513514			D3D5	9	Plantar	0.555556	0.037037	0.518519	0.565217			D3D8	9	Plantar	0.5	0.136364	0.545455	0.5			D3D13	9	Plantar	0.6	0.0909091	0.55	0.575
D2D5	9	Plantar	0.535714	0.464286	0.928571	0.56			D2D8	4	Plantar	0.5	0.0454545	0.681818	0.568182			D3D5	9	Plantar	0.565217	0	0.521739	0.652632			D3D8	9	Plantar	0.52381	0.0476191	0.571429	0.5			D3D13	9	Plantar	0.636364	0.0833333	0.590909	0.514286
D2D5	9	Plantar	0.535714	0.464286	0.892857	0.583333			D2D8	4	Plantar	0.548387	0.16129	0.612903	0.534483			D3D5	9	Plantar	0.56	0.16	0.68	0.533333			D3D8	9	Plantar	0.631579	0.0833333	0.631579	0.52381			D3D13	9	Plantar	0.565217	0	0.521739	0.555556
D2D5	9	Plantar	0.548387	0.354839	0.928571	0.59375			D2D8	4	Plantar	0.8	0.0322581	0.55	0.535714			D3D5	9	Plantar	0.583333	0.166667	0.666667	0.518519			D3D8	9	Plantar	0.583333	0.0416667	0.583333	0.5			D3D13	9	Plantar	0.5	0.0869565	0.5	0.52
D2D5	9	Plantar	0.617647	0.147059	0.741935	0.514286			D2D8	4	Plantar	0.692308	0.153846	0.641026	0.555556			D3D5	12	Plantar	0.515152	0.333333	0.818182	0.526316			D3D8	9	Plantar	0.5	0	0.625	0.52381			D3D13	9	Plantar	0.578947	0.105263	0.578947	0.56
D2D5	9	Plantar	0.52	0.16	0.64	0.5625			D2D8	9	Plantar	0.521739	0	0.521739	0.555556			D3D5	12	Plantar	0.518519	0.296296	0.777778	0.55			D3D8	9	Plantar	0.5	0.0909091	0.545455	0.6			D3D13	9	Plantar	0.56	0.12	0.6	0.5
D2D5	9	Plantar	0.592593	0.148148	0.592593	0.521739			D2D8	9	Plantar	0.545455	0.0454545	0.545455	0.538462			D3D5	12	Plantar	0.535714	0.321429	0.714286	0.590909			D3D8	12	Plantar	0.533333	0.1	0.7	0.647059			D3D13	9	Plantar	0.578947	0.08	0.526316	0.5
D2D5	12	Plantar	0.5	0.214286	0.678571	0.5			D2D8	9	Plantar	0.55	0.15	0.65	0.518519			D3D5	12	Plantar	0.518519	0.37037	0.851852	0.52381			D3D8	12	Plantar	0.551724	0.0689655	0.586207	0.55			D3D13	9	Plantar	0.608696	0.0434783	0.521739	0.541667
D2D5	12	Plantar	0.540541	0.351351	0.756757	0.56			D2D8	9	Plantar	0.521739	0.0434783	0.608696	0.518519			D3D5	12	Plantar	0.521739	0.26087	0.913043	0.52			D3D8	12	Plantar	0.533333	0.0666667	0.533333	0.521739			D3D13	9	Plantar	0.565217	0.04	0.565217	0.52381
D2D5	12	Plantar	0.514286	0.4	0.885714	0.634146			D2D8	9	Plantar	0.695652	0.173913	0.652174	0.53125			D3D5	12	Plantar	0.545455	0.0454546	0.545455	0.55			D3D8	12	Plantar	0.52	0.0952381	0.52	0.56			D3D13	12	Plantar	0.59375	0.375	0.78125	0.571429
D2D5	12	Plantar	0.536585	0.097561	0.8	0.5			D2D8	9	Plantar	0.571429	0.142857	0.666667	0.535714			D3D5	12	Plantar	0.545455	0	0.5	0.55			D3D8	12	Plantar	0.684211	0.315789	0.8	0.571429			D3D13	12	Plantar	0.657895	0.105263	0.631579	0.625
D2D5	12	Plantar	0.517241	0.103448	0.62069	0.5			D2D8	9	Plantar	0.6	0.125	0.55	0.558824			D3D5	12	Plantar	0.5	0.0416667	0.5	0.5			D3D8	12	Plantar	0.5	0.352941	0.791667	0.555556			D3D13	12	Plantar	0.529412	0.137255	0.509804	0.5
D2D5	12	Plantar	0.516129	0.0645161	0.548387	0.52			D2D8	9	Plantar	0.535714	0.142857	0.571429	0.555556			D3D5	12	Plantar	0.555556	0.166667	0.777778	0.52381			D3D8	12	Plantar	0.7	0.2	0.695652	0.652632			D3D13	12	Plantar	0.55	0.117647	0.725	0.6
D2D5	12	Plantar	0.6	0.08	0.52	0.541667			D2D8	9	Plantar	0.5	0.0769231	0.576923	0.5			D3D5	12	Plantar	0.722222	0.444444	1	0.545455			D3D8	12	Plantar	0.538462	0.0769231	0.653846	0.529412			D3D13	12	Plantar	0.52381	0.3	0.857143	0.545455
D2D5	12	Plantar	0.612903	0.147059	0.548387	0.52			D2D8	9	Plantar	0.5	0.166667	0.541667	0.5625			D3D5	15	Plantar	0.542857	0.171429	0.742857	0.538462			D3D8	12	Plantar	0.695652	0.130435	0.782609	0.538462			D3D13	12	Plantar	0.5	0.147059	0.735294	0.52
D2D5	12	Plantar	0.558824	0.131579	0.588235	0.538462			D2D8	9	Plantar	0.571429	0.238095	0.619048	0.534884			D3D5	15	Plantar	0.513514	0.135135	0.648649	0.541667			D3D8	15	Plantar	0.652174	0.0434783	0.608696	0.515152			D3D13	12	Plantar	0.527778	0.194444	0.638889	0.5
D2D5	12	Plantar	0.59375	0.1875	0.65625	0.555556			D2D8	9	Plantar	0.666667	0.047619	0.5	0.585366			D3D5	15	Plantar	0.590909	0.204545	0.704545	0.52			D3D8	15	Plantar	0.538462	0.0769231	0.576923	0.527778			D3D13	12	Plantar	0.52	0	0.72	0.571429
D2D5	12	Plantar	0.5	0.235294	0.705882	0.52			D2D8	9	Plantar	0.541667	0	0.5	0.529412			D3D5	15	Plantar	0.551724	0.344828	0.896552	0.5			D3D8	15	Plantar	0.5	0.433333	0.933333	0.518519			D3D13	15	Plantar	0.5	0.266667	0.866667	0.535714
D2D5	12	Plantar	0.513514	0.297297	0.72973	0.555556			D2D8	9	Plantar	0.52381	0.0416667	0.52381	0.518519			D3D5	15	Plantar	0.518519	0.259259	0.814815	0.555556			D3D8	15	Plantar	0.615385	0.269231	0.807692	0.538462			D3D13	15	Plantar	0.514286	0.228571	0.771429	0.515152
D2D5	12	Plantar	0.518519	0.0555556	0.592593	0.5			D2D8	12	Plantar	0.518519	0.037037	0.555556	0.600645			D3D5	15	Plantar	0.533333	0.3	0.8	0.542857			D3D8	15	Plantar	0.5	0.2	0.7	0.5			D3D13	15	Plantar	0.551724	0.103448	0.689655	0.516129
D2D5	15	Plantar	0.534884	0.162791	0.55814	0.540541			D2D8	12	Plantar	0.533333	0.037037	0.6	0.521739			D3D5	15	Plantar	0.551724	0.0344828	0.689655	0.535714			D3D8	15	Plantar	0.511628	0.0465116	0.581395	0.551724			D3D13	15	Plantar	0.548387	0.129032	0.580645	0.526316
D2D5	15	Plantar	0.55102	0.0697674	0.632653	0.5			D2D8	12	Plantar	0.56	0.166667	0.56	0.56			D3D5	15	Plantar	0.52	0.133333	0.6	0.52			D3D8	15	Plantar	0.5	0	0.555556	0.5			D3D13	15	Plantar	0.535714	0	0.607143	0.515152
D2D5	15	Plantar	0.545455	0.163265	0.690909	0.5			D2D8	12	Plantar	0.56	0	0.52	0.525			D3D5	15	Plantar	0.566667	0.0322581	0.666667	0.516129			D3D8	15	Plantar	0.558824	0.111111	0.647059	0.5			D3D13	15	Plantar	0.586207	0.107143	0.586207	0.555556
D2D5	15	Plantar	0.5	0	0.56	0.527778			D2D8	12	Plantar	0.615385	0.346154	0.730769	0.566667			D3D5	15	Plantar	0.551724	0.206897	0.655172	0.5			D3D8	15	Plantar	0.7	0.35	1	0.545455			D3D13	15	Plantar	0.5	0.125	0.65625	0.595238
D2D5	15	Plantar	0.511628	0.0930233	0.534884	0.5			D2D8	12	Plantar	0.652174	0.26087	0.913043	0.566667			D3D5	15	Plantar	0.548387	0.225806	0.677419	0.52			D3D8	15	Plantar	0.5	0.333333	0.833333	0.5			D3D13	15	Plantar	0.5625	0.125	0.59375	0.516129
D2D5	15	Plantar	0.586957	0.108696	0.586957	0.536585			D2D8	12	Plantar	0.518519	0.37037	0.851852	0.535714			D3D5	15	Plantar	0.607143	0.214286	0.714286	0.521739			D3D8	15	Plantar	0.514286	0.257143	0.771429	0.533333			D3D13	15	Plantar	0.517241	0.241379	0.827586	0.516129
D2D5	15	Plantar	0.606061	0.424242	0.909091	0.558824			D2D8	12	Plantar	0.56	0	0.6	0.53125			D3D5	15	Plantar	0.538462	0.115385	0.615385	0.533333			D3D8	15	Plantar	0.516129	0.193548	0.741935	0.516129			D3D13	15	Plantar	0.516129	0.193548	0.741935	0.533333
D2D5	15	Plantar	0.512821	0.410256	0.897436	0.551724			D2D8	12	Plantar	0.535714	0.0357143	0.535714	0.516129			D3D5	15	Plantar	0.576923	0.153846	0.653846	0.518519			D3D8	15	Plantar	0.5	0.205882	0.705882	0.545455			D3D13	15	Plantar	0.545455	0.151515	0.69697	0.517241
D2D5	15	Plantar	0.595238	0.47619	0.928571	0.5			D2D8	12	Plantar	0.527778	0.138889	0.611111	0.538462			D3D5	16	Plantar	0.5	0.269231	0.730769	0.540541			D3D8	16	Plantar	0.551724	0.482759	0.896552	0.52			D3D13	15	Plantar	0.580645	0.193548	0.709677	0.512195
D2D5	15	Plantar	0.575	0.425	1	0.5			D2D8	15	Plantar	0.515152	0.151515	0.636364	0.5			D3D5	16	Plantar	0.5	0.192308	0.730769	0.64			D3D8	16	Plantar	0.571429	0.25	0.931034	0.521739			D3D13	15	Plantar	0.566667	0.2	0.733333	0.53125
D2D5	15	Plantar	0.540541	0.27027	0.837838	0.529412			D2D8	15	Plantar	0.536585	0.317073	0.804878	0.551724			D3D5	16	Plantar	0.521739	0.391304	0.826087	0.555556			D3D8	16	Plantar	0.52	0.12	0.6	0.52381			D3D13	16	Plantar	0.558824	0.323529	0.676471	0.518519
D2D5	16	Plantar	0.52381	0.452381	0.904762	0.516129			D2D8	15	Plantar	0.538462	0.205128	0.564103	0.517241			D3D5	16	Plantar	0.52381	0.47619	0.952381	0.515152			D3D8	16	Plantar	0.5	0.0769231	0.538462	0.551724			D3D13	16	Plantar	0.515152	0.151515	0.575758	0.541667
D2D5	16	Plantar	0.545455	0.181818	0.857143	0.516129			D2D8	15	Plantar	0.514286	0.025641	0.542857	0.5			D3D5	16	Plantar	0.545455	0.0909091	0.590909	0.518519			D3D8	16	Plantar	0.5	0.153846	0.615385	0.55			D3D13	16	Plantar	0.518519	0	0.555556	0.512195
D2D5	16	Plantar	0.512821	0.102564	0.659091	0.518519			D2D8	15	Plantar	0.514286	0.114286	0.6	0.517241			D3D5	16	Plantar	0.545455	0.136364	0.590909	0.535714			D3D8	16	Plantar	0.518519	0.037037	0.518519	0.521739			D3D13	16	Plantar	0.53125	0.09375	0.53125	0.5
D2D5	16	Plantar	0.533333	0.0888889	0.615385	0.5			D2D8	15	Plantar	0.513514	0.216216	0.72973	0.5			D3D5	16	Plantar	0.5	0.318182	0.818182	0.518519			D3D8	16	Plantar	0.565217	0.0434783	0.521739	0.555556			D3D13	16	Plantar	0.576923	0.384615	0.807692	0.5
D2D5	16	Plantar	0.515152	0	0.575758	0.62063			D2D8	15	Plantar	0.512821	0.153846	0.692308	0.5			D3D5	16	Plantar	0.578947	0.210526	0.736842	0.521739			D3D8	16	Plantar	0.518519	0.148148	0.555556	0.555556			D3D13	16	Plantar	0.6	0.32	0.84	0.513514
D2D5	16	Plantar	0.529412	0.0909091	0.558824	0.56			D2D8	15	Plantar	0.526316	0.105263	0.578947	0.538462			D3D5	16	Plantar	0.52	0.12	0.56	0.545455			D3D8	16	Plantar	0.75	0.375	0.875	0.535714			D3D13	16	Plantar	0.583333	0.291667	0.75	0.521739
D2D5	16	Plantar	0.540541	0.108108	0.567568	0.535714			D2D8	15	Plantar	0.548387	0.193548	0.612903	0.526316			D3D5	16	Plantar	0.588235	0.0588235	0.529412	0.545455			D3D8	16	Plantar	0.666667	0.388889	0.888889	0.52			D3D13	16	Plantar	0.56	0.28	0.76	0.5
D2D5	16	Plantar	0.533333	0	0.633333	0.5			D2D8	15	Plantar	0.545455	0.151515	0.666667	0.545455			D3D5	16	Plantar	0.576923	0.0769231	0.5	0.5			D3D8	16	Plantar	0.55	0.1	0.55	0.5625			D3D13	16	Plantar	0.521739	0.0869565	0.608696	0.526316
D2D5	16	Plantar	0.607143	0	0.571429	0.62069			D2D8	15	Plantar	0.527778	0.0833333	0.583333	0.535714			D3D5	19	Plantar	0.575758	0.0606061	0.69697	0.5			D3D8	16	Plantar	0.578947	0.157895	0.526316	0.516129			D3D13	16	Plantar	0.538462	0.115385	0.615385	0.529412
D2D5	16	Plantar	0.5	0.1	0.633333	0.615385			D2D8	15	Plantar	0.551724	0.0689655	0.655172	0.5			D3D5	19	Plantar	0.542857	0.0857143	0.542857	0.555556			D3D8	19	Plantar	0.615385	0	0.5	0.545455			D3D13	16	Plantar	0.583333	0	0.5	0.5
D2D5	16	Plantar	0.521739	0.304348	0.782609	0.516129			D2D8	16	Plantar	0.518519	0.037037	0.555556	0.606061			D3D5	19	Plantar	0.575758	0.121212	0.515152	0.846154			D3D8	19	Plantar	0.555556	0.037037	0.518519	0.560976			D3D13	16	Plantar	0.56	0	0.52	0.5
D2D5	16	Plantar	0.5	0.333333	0.791667	0.517241			D2D8	16	Plantar	0.535714	0.428571	0.892857	0.612903			D3D5	19	Plantar	0.55	0.2	0.75	0.857143			D3D8	19	Plantar	0.545455	0.0454546	0.636364	0.5			D3D13	19	Plantar	0.666667	0	0.666667	0.521739
D2D5	16	Plantar	0.52	0.32	0.84	0.5			D2D8	16	Plantar	0.535714	0.464286	0.928571	0.545455			D3D5	19	Plantar	0.55814	0.232558	0.837209	0.722222			D3D8	19	Plantar	0.5	0.0454546	0.636364	0.516129			D3D13	19	Plantar	0.625172	0.137931	0.655172	0.529412
D2D5	19	Plantar	0.548387	0	0.548387	0.529412			D2D8	16	Plantar	0.512195	0.146341	0.560976	0.606061			D3D5	19	Plantar	0.551724	0.275862	0.827586	0.571429			D3D8	19	Plantar	0.541667	0.0416667	0.583333	0.535714			D3D13	19	Plantar	0.5	0	0.538462	0.542857
D2D5	19	Plantar	0.645161	0	0.516129	0.5			D2D8	16	Plantar	0.5	0.0487805	0.5	0.529412			D3D5	19	Plantar	0.555556	0.296296	0.851852	0.5			D3D8	19	Plantar	0.571429	0.428571	0.9375	0.521739			D3D13	19	Plantar	0.526316	0.0526316	0.526316	0.53125
D2D5	19	Plantar	0.56	0.32	0.72	0.5			D2D8	16	Plantar	0.541667	0.166667	0.541667	0.518519			D3D5	19	Plantar	0.518519	0.296296	0.851852	0.55			D3D8	19	Plantar	0.594595	0.432432	0.918919	0.529412			D3D13	19	Plantar	0.625	0.222222	0.777778	0.533333
D2D5	19	Plantar	0.695652	0.195652	0.608696	0.513514			D2D8	16	Plantar	0.571429	0.142857	0.619048	0.538462			D3D5	3	Dorsal	0.527778	0.416667	0.861111	0.5			D3D8	19	Plantar	0.533333	0	0.566667	0.5			D3D13	19	Plantar	0.55	0.05	0.65	0.56
D2D5	19	Plantar	0.571429	0.108696	0.685714	0.515152			D2D8	16	Plantar	0.517241	0.0689655	0.551724	0.576923			D3D5	4	Dorsal	0.622105	0.210526	0.972222	0.535714			D3D8	3	Dorsal	0.52	0.12	0.56	0.535714			D3D13	19	Plantar	0.56	0.16	0.6	0.5
D2D5	19	Plantar	0.583333	0	0.541667	0.522727			D2D8	16	Plantar	0.517241	0.0344828	0.517241	0.535714			D3D5	4	Dorsal	0.9375	0	0.9375	0.516129			D3D8	3	Dorsal	0.541667	0.0833333	0.541667	0.516129			D3D13	19	Plantar	0.761905	0.0476191	0.666667	0.515152
D2D5	19	Plantar	0.590909	0.0833333	0.545455	0.584906			D2D8	16	Plantar	0.555556	0.481481	1	0.535714			D3D5	4	Dorsal	0.764706	0.0588235	0.647059	0.733333			D3D8	4	Dorsal	0.59375	0.21875	0.8125	0.733333			D3D13	19	Plantar	0.6	0.2	0.6	0.515152
D2D5	19	Plantar	0.565217	0.173913	0.695652	0.512821			D2D8	16	Plantar	0.518519	0.259259	0.888889	0.5			D3D5	4	Dorsal	0.538462	0.307692	0.769231	0.533333			D3D8	4	Dorsal	0.842105	0.368421	0.774194	0.533333			D3D13	19	Plantar	0.866667	0.105263	0.631579	0.53125
D2D5	19	Plantar	0.5	0	0.571429	0.511111			D2D8	16	Plantar	0.5	0.0384615	0.5	0.512195			D3D5	4	Dorsal	0.545455	0.181818	0.590909	0.533333			D3D8	4	Dorsal	0.566667	0.1	0.566667	0.533333			D3D13	19	Plantar	0.578947	0.157895	0.736842	0.515152
D2D5	19	Plantar	0.515152	0.0357143	0.606061	0.578947			D2D8	19	Plantar	0.538462	0.0384615	0.538462	0.5			D3D5	4	Dorsal	0.5	0.0454546	0.5	0.5			D3D8	4	Dorsal	0.612903	0.0967742	0.548387	0.5			D3D13	2	Dorsal	0.705882	0.12	0.588235	0.53125
D2D5	19	Plantar	0.571429	0.0909091	0.6	0.513514			D2D8	19	Plantar	0.542857	0.0857143	0.628571	0.517241			D3D5	4	Dorsal	0.65	0.4	0.769231	0.518519			D3D8	4	Dorsal	0.518519	0	0.518519	0.518519			D3D13	2	Dorsal	0.555556	0.388889	0.884615	0.529412
D2D5	19	Plantar	0.56	0.16	0.68	0.527778			D2D8	19	Plantar	0.558824	0.0285714	0.529412	0.5			D3D5	4	Dorsal	0.5	0.178571	0.678571	0.533333			D3D8	12	Dorsal	0.52381	0.129032	0.571429	0.533333			D3D13	4	Dorsal	0.540541	0.27027	0.72973	0.529412
D2D5	19	Plantar	0.65	0.166667	0.6	0.564103			D2D8	19	Plantar	0.730769	0.346154	0.769231	0.518519			D3D5	9	Dorsal	0.619048	0.0952381	0.571429	0.517241			D3D8	12	Dorsal	0.666667	0.333333	1	0.517241			D3D13	4	Dorsal	0.538462	0.153846	0.5	0.533333
D2D5	2	Dorsal	0.518519	0.259259	0.703704	0.513514			D2D8	19	Plantar	0.521739	0.0869565	0.521739	0.517241			D3D5	9	Dorsal	0.526316	0.105263	0.631579	0.52			D3D8	12	Dorsal	0.526316	0.210526	0.789474	0.52			D3D13	4	Dorsal	0.518519	0.0740741	0.518519	0.571429
D2D5	2	Dorsal	0.590909	0.272727	0.818182	0.514286			D2D8	19	Plantar	0.875	0.125	0.708333	0.56			D3D5	9	Dorsal	0.55	0	0.55	0.52			D3D8	12	Dorsal	0.727273	0.363636	0.75	0.52			D3D13	4	Dorsal	0.5	0.037037	0.545455	0.538462
D2D5	2	Dorsal	0.578947	0.263158	0.878788	0.511628			D2D8	19	Plantar	0.684211	0	0.631579	0.551724			D3D5	12	Dorsal	0.571429	0	0.578947	0.555556			D3D8	19	Dorsal	0.516129	0.483871	0.967742	0.555556			D3D13	4	Dorsal	0.518519	0.037037	0.555556	0.517241
D2D5	4	Dorsal	0.555556	0.0697674	0.583333	0.548387			D2D8	19	Plantar	0.777778	0.130435	0.722222	0.625			D3D5	12	Dorsal	0.526316	0.0555556	0.555556	0.5			D3D8	19	Dorsal	0.6875	0.4375	0.83871	0.5			D3D13	12	Dorsal	0.586207	0	0.586207	0.517241
D2D5	4	Dorsal	0.651163	0.186047	0.511628	0.525			D2D8	19	Plantar	0.615385	0.0384615	0.538462	0.516129			D3D5	12	Dorsal	0.5	0	0.541667	0.545455			D3D8	19	Dorsal	0.62069	0.0689655	0.517241	0.545455			D3D13	12	Dorsal	0.5	0.166667	0.944444	0.518519
D2D5	4	Dorsal	0.551724	0.482759	0.966667	0.512821			D2D8	19	Plantar	0.621739	0.0384615	0.608696	0.591837			D3D5	12	Dorsal	0.846154	0.5	0.615385	0.526316			D3D8	19	Dorsal	0.529412	0.117647	0.705882	0.629048			D3D13	12	Dorsal	0.52	0.12	0.56	0.5
D2D5	4	Dorsal	0.625	0.458333	0.896552	0.512195			D2D8	19	Plantar	0.526316	0.210526	0.789474	0.536585			D3D5	12	Dorsal	0.857143	0.0645161	0.612903	0.52381			D3D8	19	Dorsal	0.55	0.2	0.65	0.6			D3D13	12	Dorsal	0.555556	0.0555556	0.666667	0.541667
D2D5	9	Dorsal	0.535714	0.0357143	0.535714	0.533333			D2D8	19	Plantar	0.555556	0.277778	0.777778	0.52			D3D5	15	Dorsal	0.516129	0.0967742	0.516129	0.52381												D3D13	12	Dorsal	0.5	0.0666667	0.55	0.52
D2D5	9	Dorsal	0.952381	0.0476191	0.52381	0.536585			D2D8	12	Dorsal	0.526316	0.0434783	0.521739	0.538462			D3D5	19	Dorsal	0.594595	0.27027	0.783784	0.545455												D3D13	12	Dorsal	0.533333	0.24	0.733333	0.5
D2D5	9	Dorsal	0.6	0.3	1	0.586207			D2D8	12	Dorsal	0.538462	0	0.52381	0.526316			D3D5	19	Dorsal	0.923077	0.375	0.615385	0.5												D3D13	15	Dorsal	0.59375	0.0689655	0.5625	0.52
D2D5	9	Dorsal	0.5	0.125	0.625	0.633333			D2D8	12	Dorsal	0.608696	0.102564	0.512821	0.5			D3D5	19	Dorsal	0.65	0.441176	0.852941	0.521739												D3D13	19	Dorsal	0.777778	0.222222	0.722222	0.5
D2D5	12	Dorsal	0.5	0.0833333	0.583333	0.516129			D2D8	12	Dorsal	0.904762	0.102564	0.5625	0.542857			D3D5	19	Dorsal	0.529412	0.235294	0.823529	0.6												D3D13	19	Dorsal	0.923077	0	0.615385	0.5
D2D5	15	Dorsal	0.526316	0.0526316	0.526316	0.551724			D2D8	15	Dorsal	0.615385	0.0285714	0.542857	0.622222			D3D5	19	Dorsal	0.5	0.416667	0.791667	0.5												D3D13	19	Dorsal	0.666667	0.142857	0.714286	0.571429
D2D5	15	Dorsal	0.538462	0.0384615	0.730769	0.52381			D2D8	19	Dorsal	0.5	0.0714286	0.5	0.666667			D3D5	19	Dorsal	0.545455	0.0454546	0.590909	0.636364												D3D13	19	Dorsal	0.619048	0.416667	0.714286	0.6
									D2D8	19	Dorsal	0.514286	0	0.529412	0.55			D3D5	19	Dorsal	0.608333	0.125	0.708333	0.529412
	Average		0.556802	0.192243	0.693036	0.542291				Average		0.572281	0.14574	0.639194	0.541669				Average		0.57533	0.185702	0.685639	0.549993				Average		0.565111	0.166391	0.666809	0.538359				Average		0.564499	0.143785	0.654226	0.534048
	St. Deviation		0.0651032	0.141241	0.134213	0.0405218				St. Deviation		0.0817831	0.125352	0.128653	0.0363629				St. Deviation		0.0976466	0.139146	0.13752	0.0604134				St. Deviation		0.0655329	0.134381	0.132231	0.0383637				St. Deviation		0.0713303	0.11405	0.117535	0.0291551
	Total Number Steps		107	107	107	107				Total Number Steps		108	108	108	108				Total Number Steps		108	108	108	108				Total Number Steps		100	100	100	100				Total Number Steps		107	107	107	107
	# of steps outside 2 S.D.		8	42	43	9				# of steps outside 2 S.D.		17	28	24	7				# of steps outside 2 S.D.		13	49	40	11				# of steps outside 2 S.D.		12	37	31	5				# of steps outside 2 S.D.		12	36	32	3
