# Supplementary figures and images for: Silencing long-descending inter-enlargement propriospinal neurons improves hindlimb stepping after contusive spinal cord injuries
Source: eLife journal article supplement (doi:10.7554/elife.82944), 2023-12-15

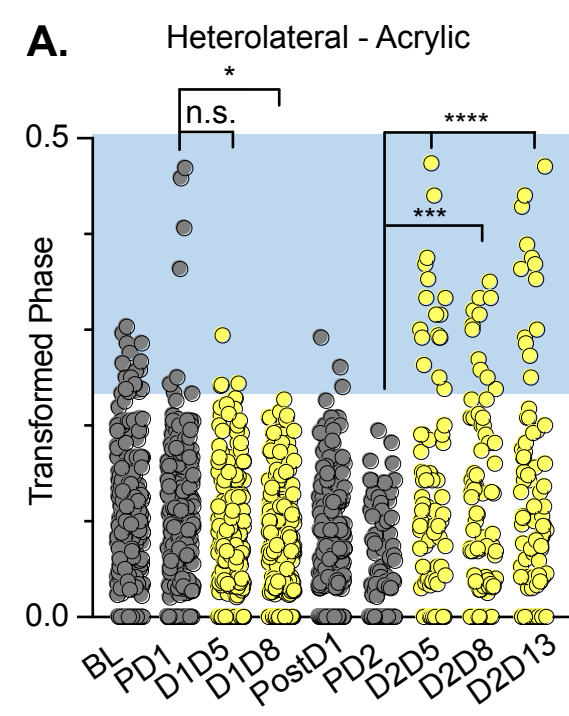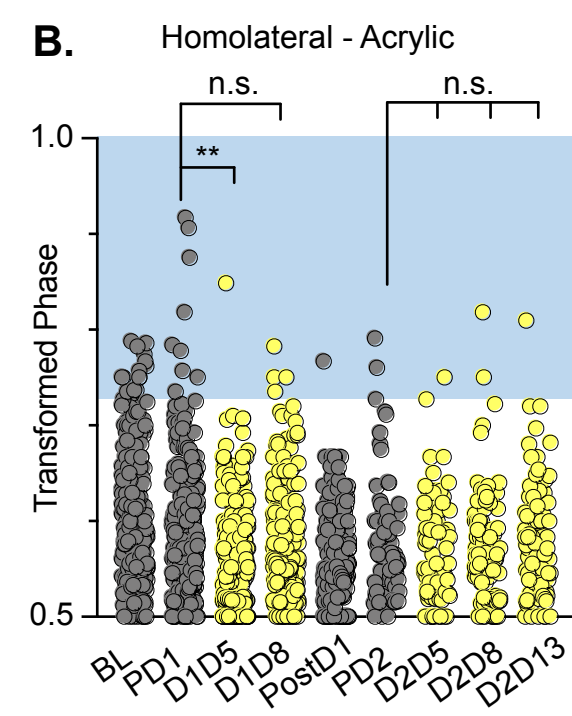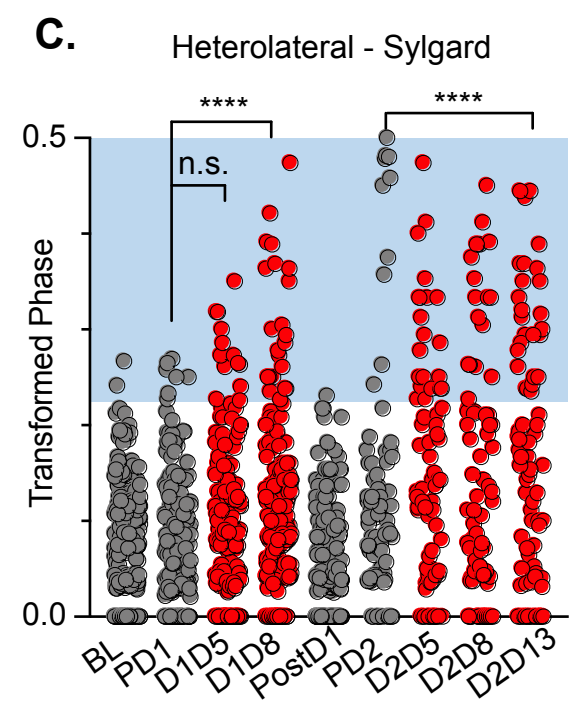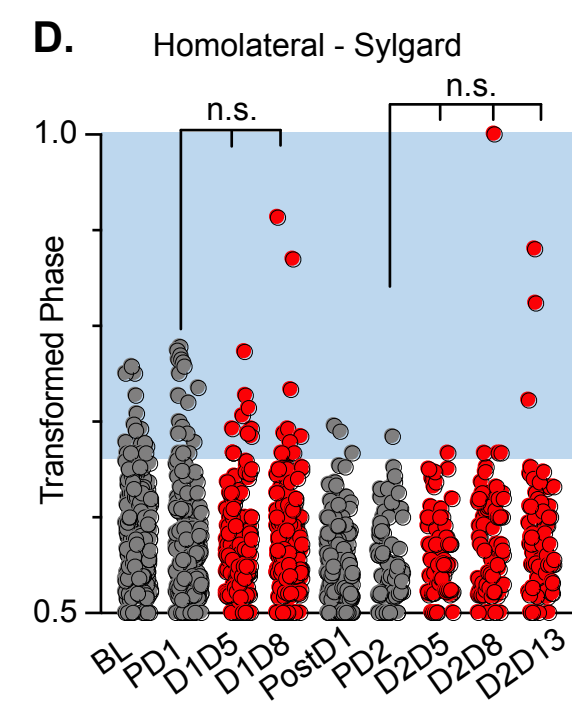

Supplement: supp [file elife_poa_e82944_Figure_2_figure_supplement_1.pdf › elife_poa_e82944_Figure_2_figure_supplement_1.pdf]

LAPNs

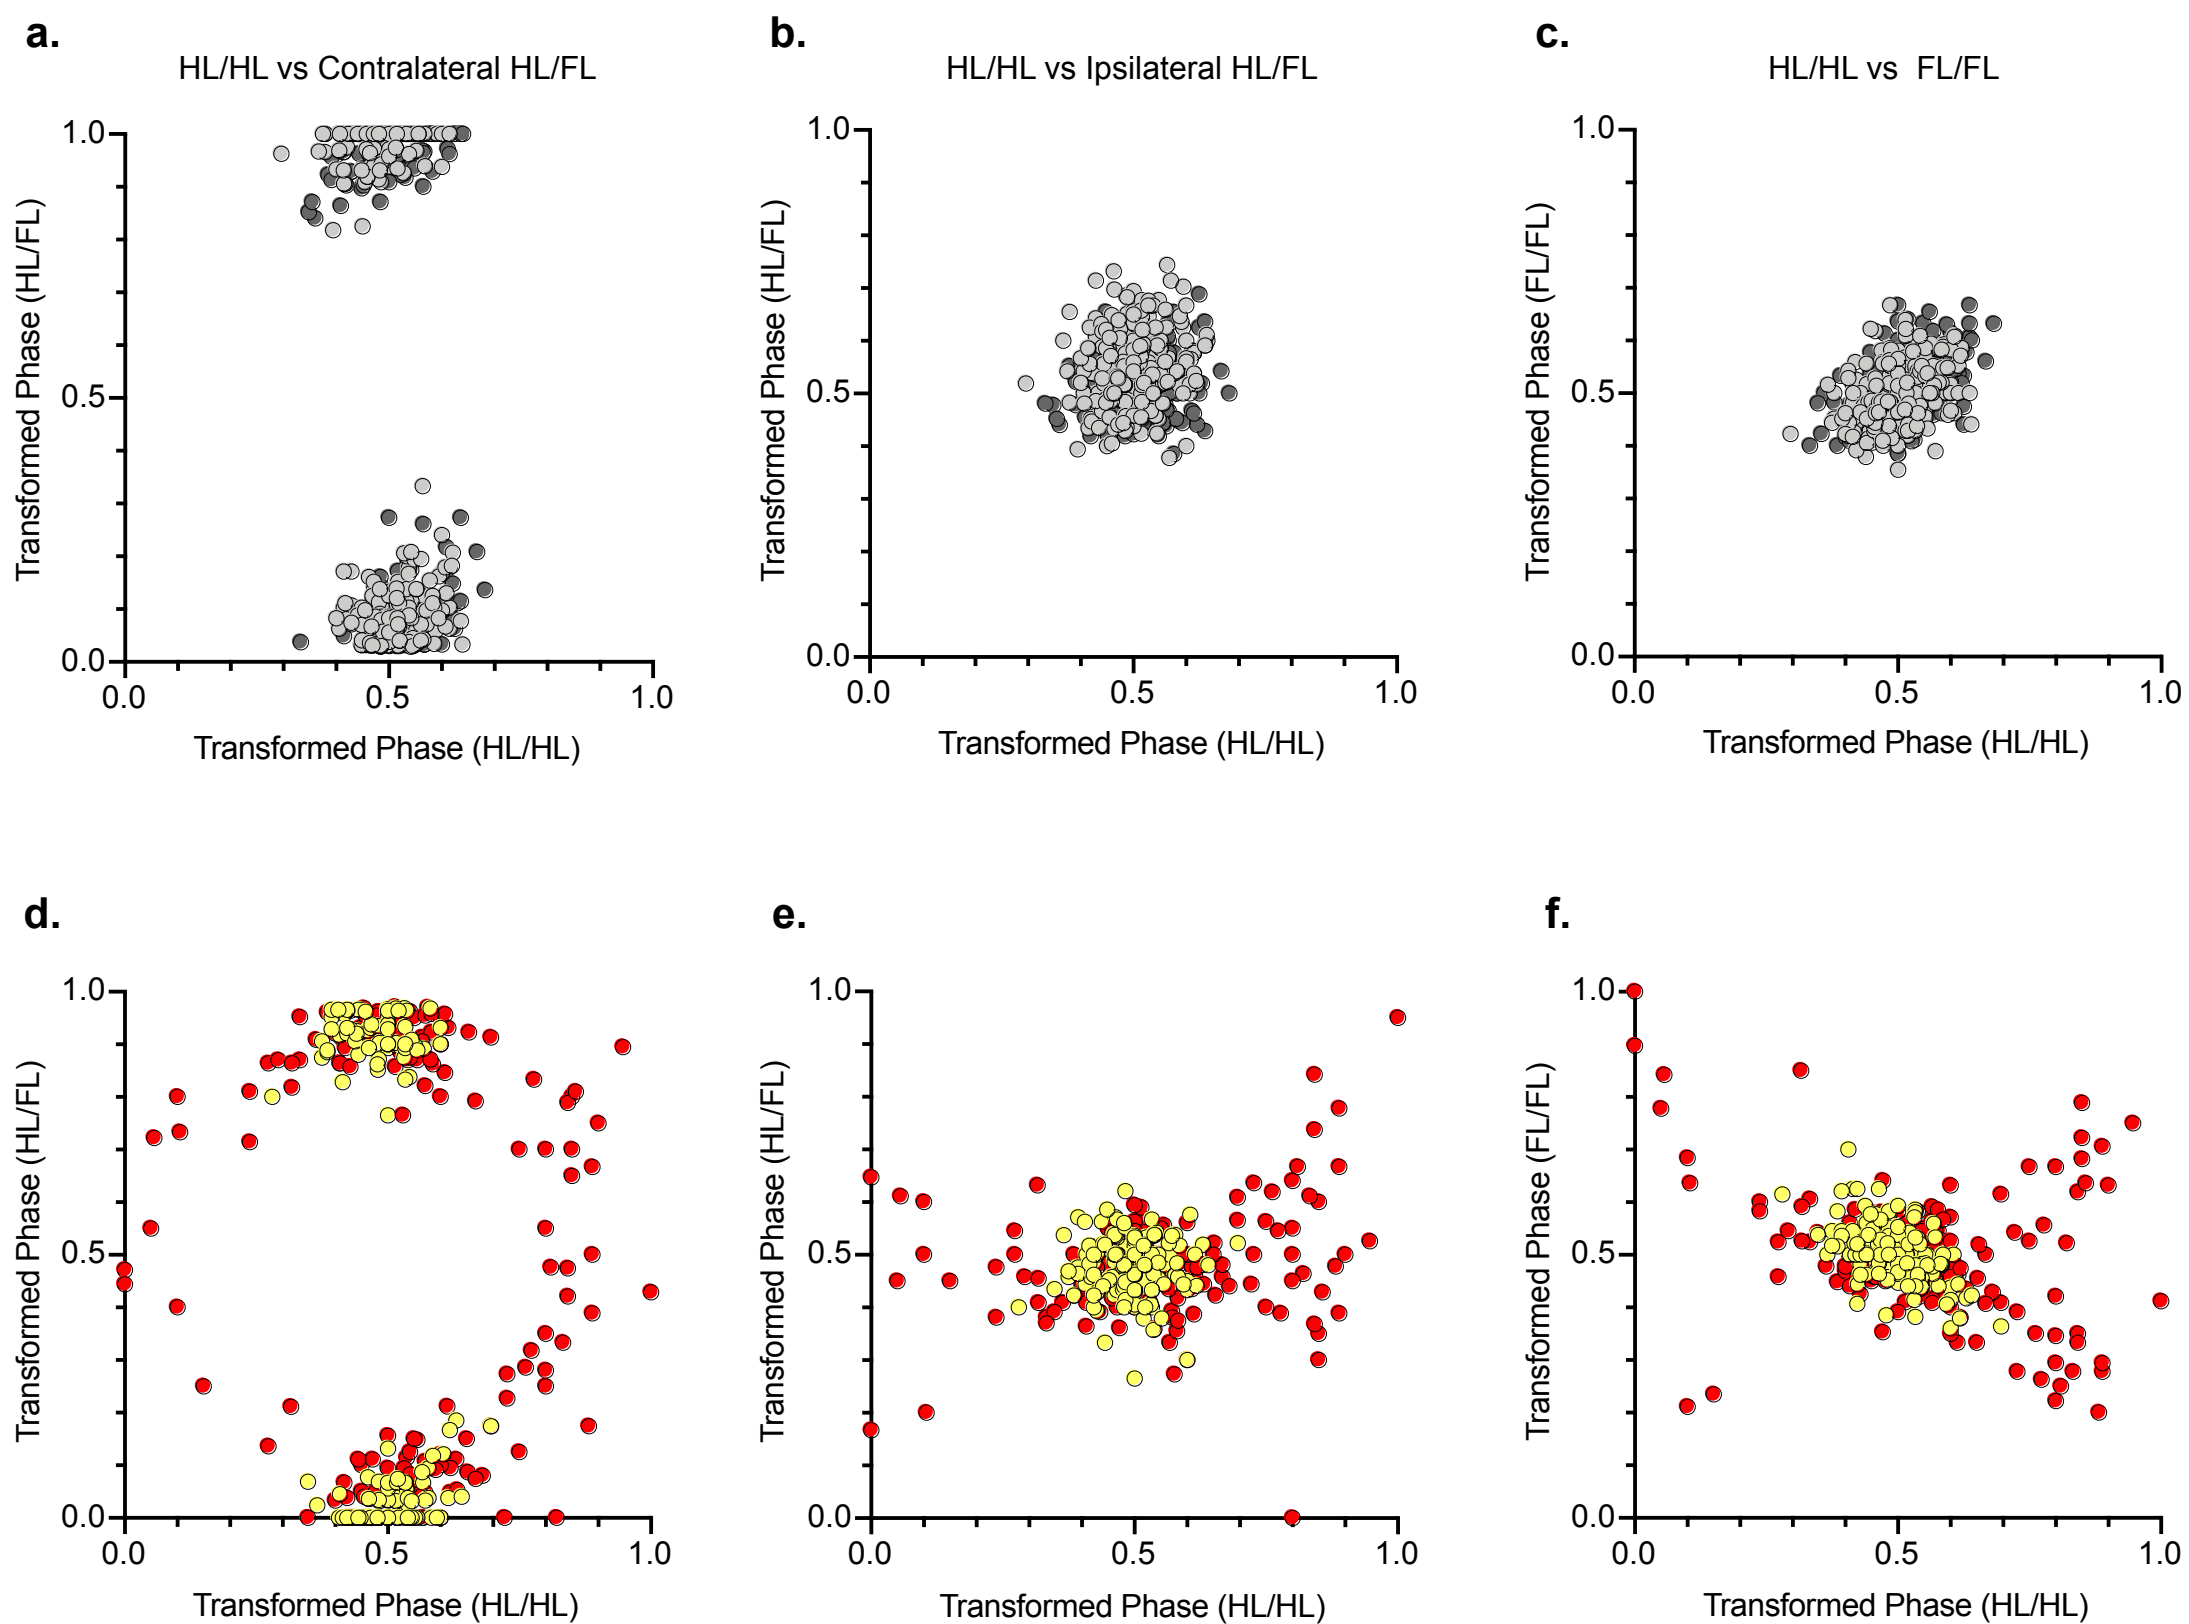

LDPNs

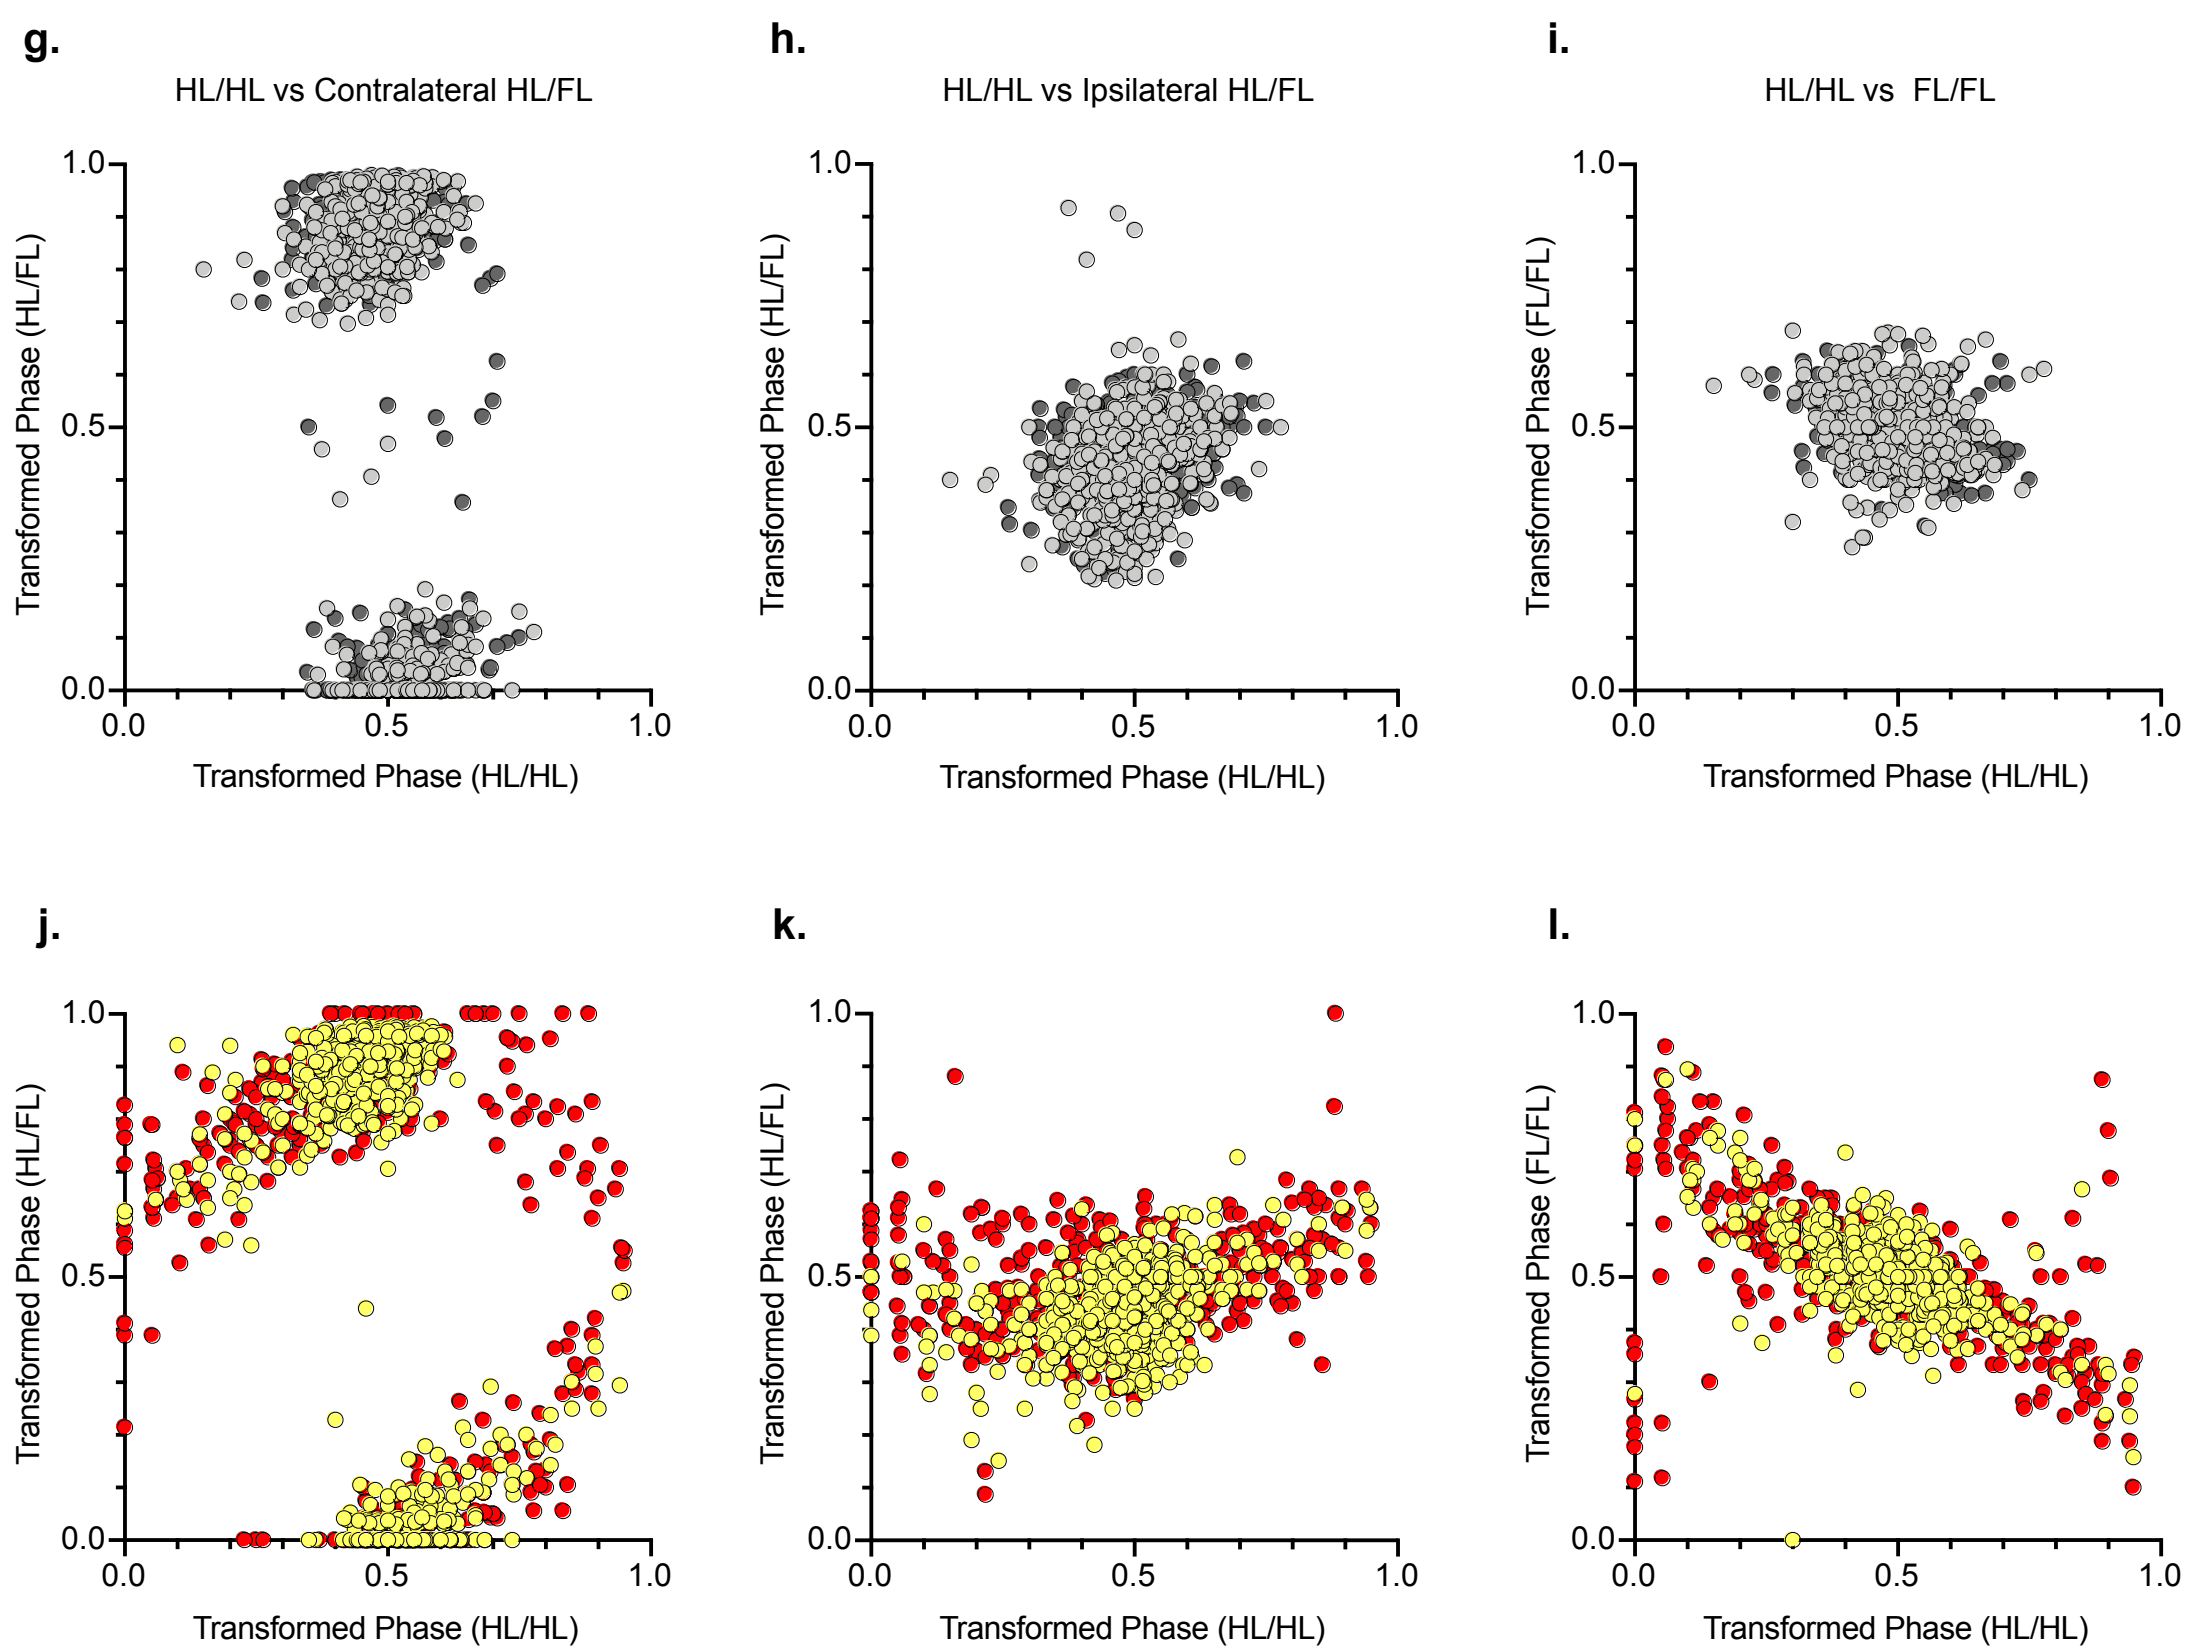

Control Acrylic
  Control Sylgard
  Dox Acrylic
  Dox Sylgard

Supplement: supp [file elife_poa_e82944_Figure_2_figure_supplement_2.pdf › elife_poa_e82944_Figure_2_figure_supplement_2.pdf]

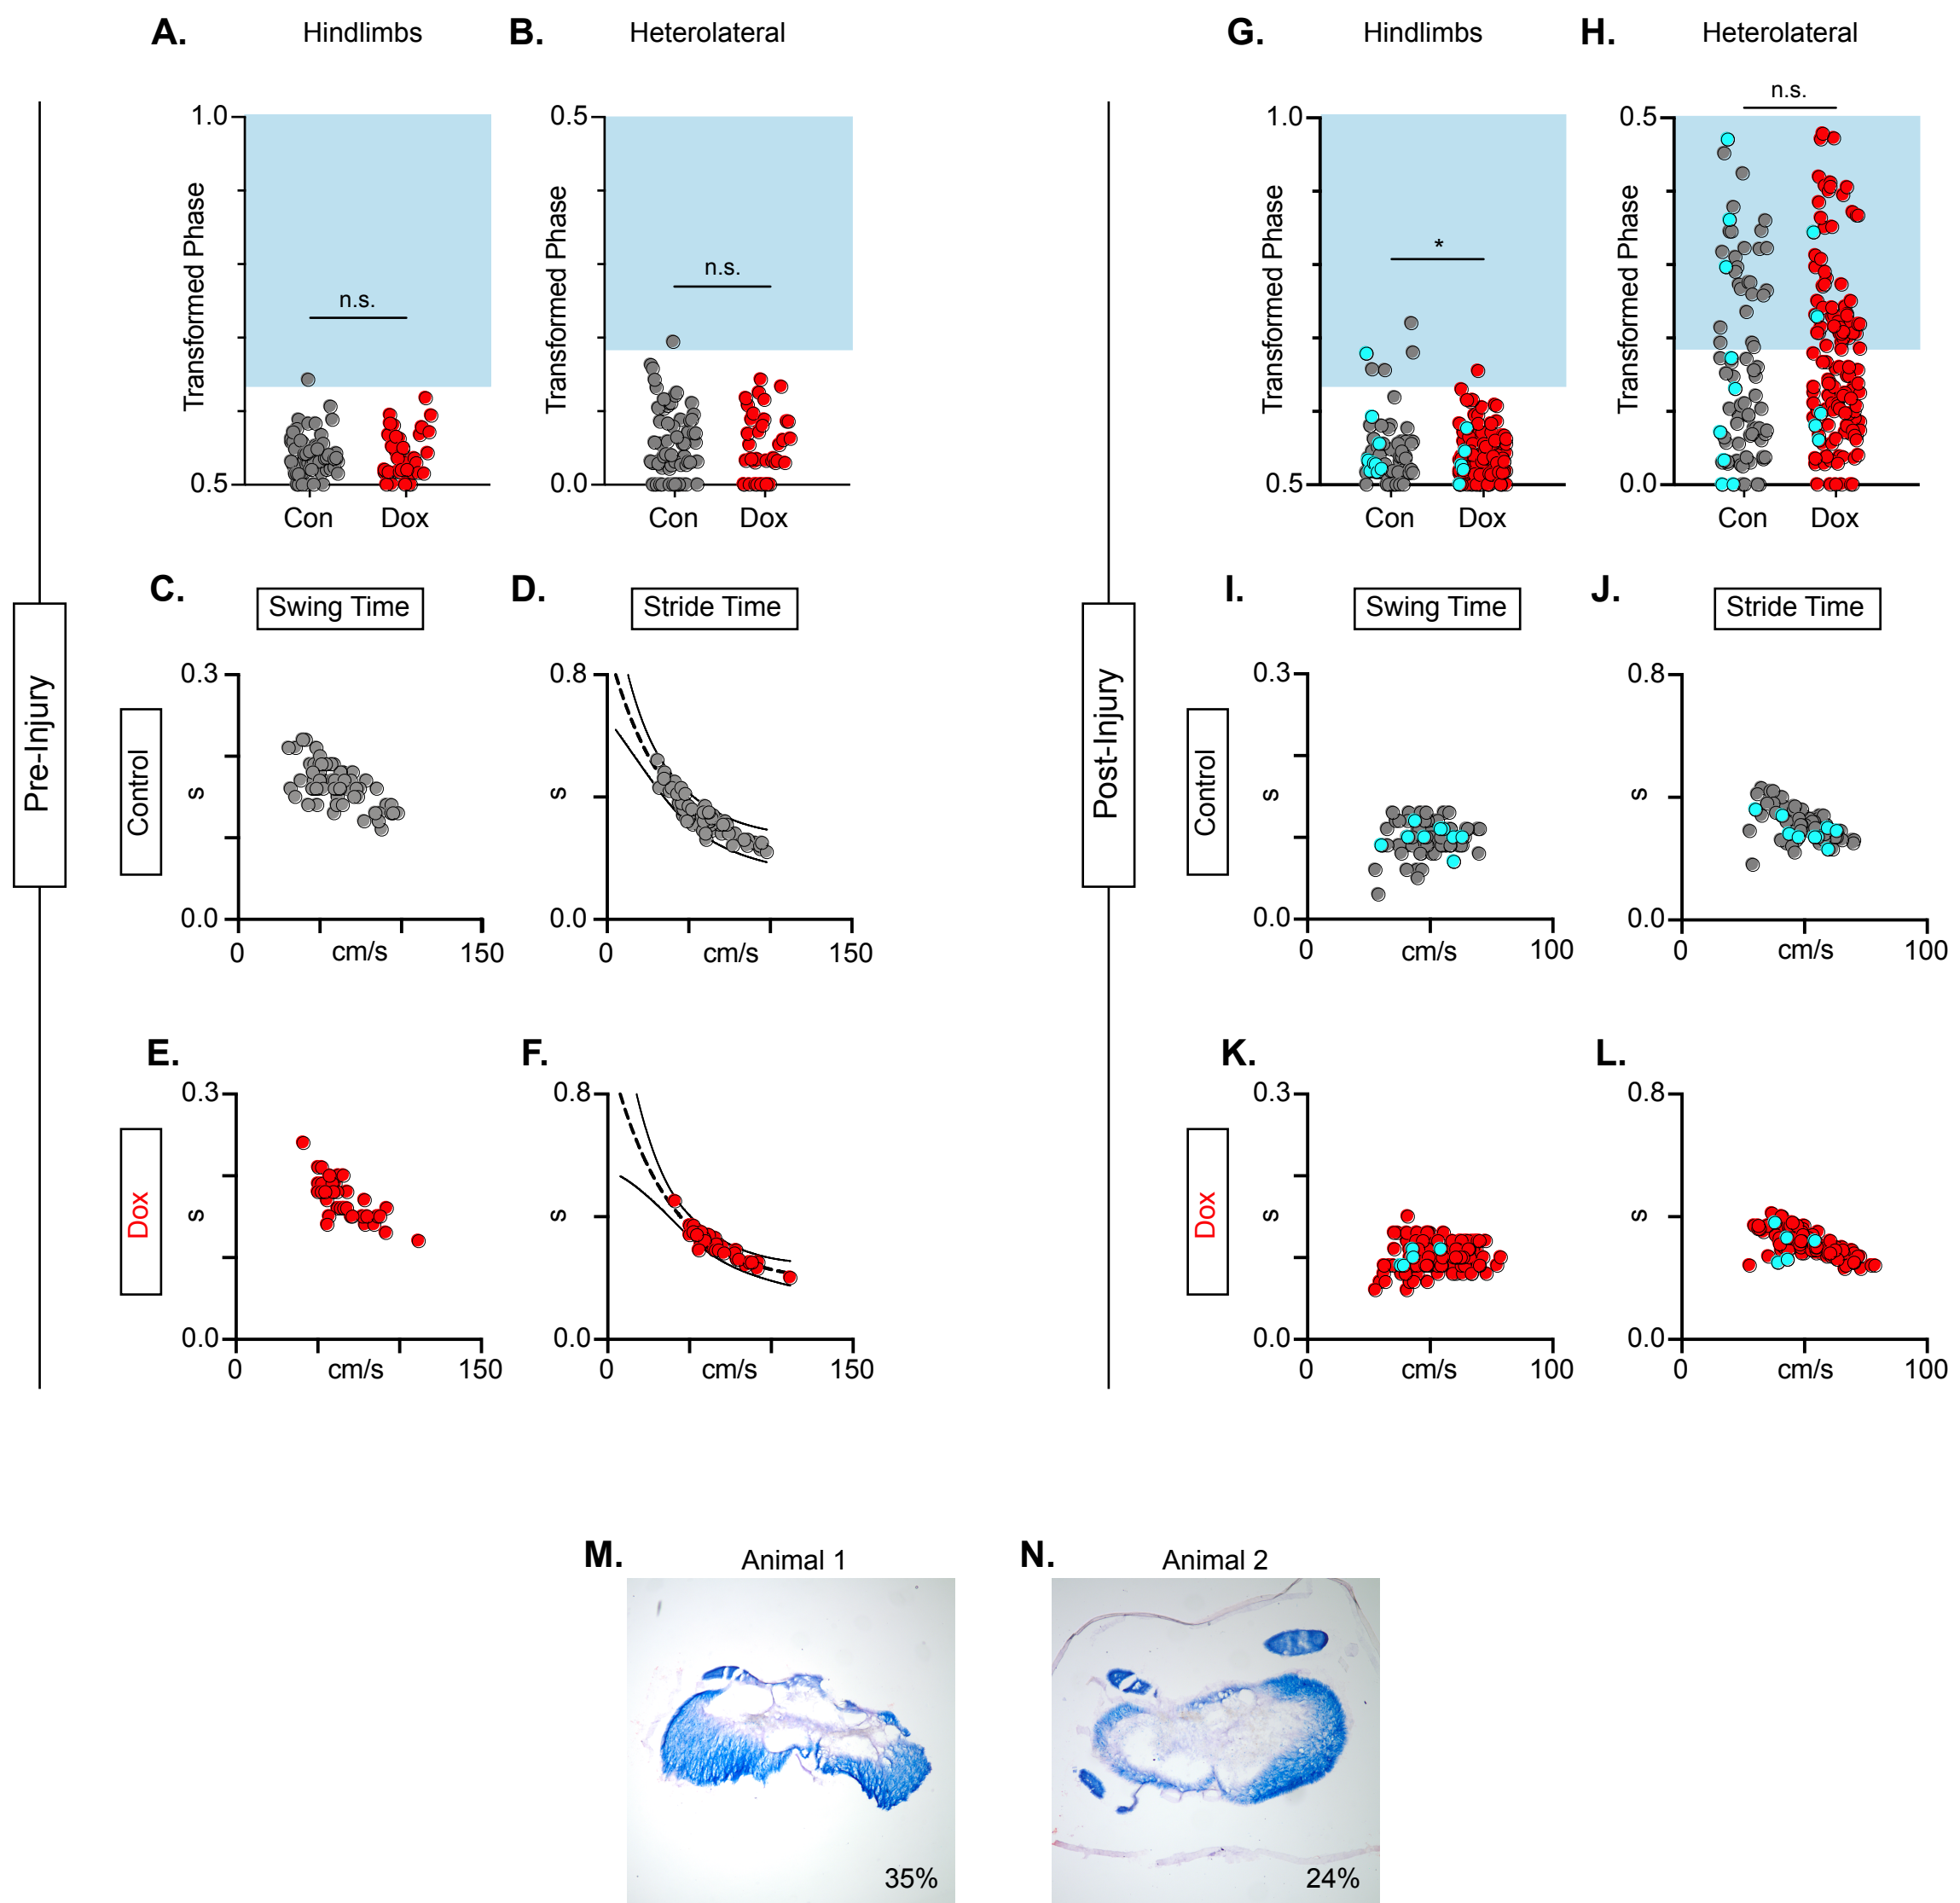

Supplement: supp [file elife_poa_e82944_Figure_9_figure_supplement_1.pdf › elife_poa_e82944_Figure_9_figure_supplement_1.pdf]
